# Supplementary material for: Copper(i)/Ganphos catalysis: enantioselective synthesis of diverse spirooxindoles using iminoesters and alkyl substituted methyleneindolinones
Source: Royal Society of Chemistry journal article supplement (doi:10.1039/d0ob00546k), 2020-01-01
Supplement: d0ob00546k1.pdf [file d0ob00546k1.pdf]

# *Supporting Information*

## **Copper(I)/Ganphos Catalysis: Enantioselective Synthesis of Diversified Spirooxindoles Using Alkyl Substituted Imino Ester and Methyleneindolinones**

Hao Cui<sup>‡</sup>, Ke Li<sup>‡</sup>, Yue Wang, Manman Song, Congcong Wang, Donghui Wei,\* Er-Qing Li,\* Zheng Duan,\* and François Mathey

College of Chemistry, Green Catalysis Center, International Phosphorus Laboratory, International Joint Research Laboratory for Functional Organophosphorus Materials of Henan Province, Zhengzhou University, Zhengzhou 450001, P. R. China

|                                                                                                  |      |
|--------------------------------------------------------------------------------------------------|------|
| 1. General Experimental Details .....                                                            | S1   |
| 2. General Procedure for the Synthesis of Ligands.....                                           | S2   |
| 3. Synthesis of starting materials .....                                                         | S4   |
| 4. Reaction Conditions.....                                                                      | S5   |
| 5. General Procedure for Reactions. ....                                                         | S7   |
| 6. Characterization of compounds. ....                                                           | S9   |
| 7. Copies of NMR spectra.....                                                                    | S32  |
| 8. Copies of HPLC Chromatograms .....                                                            | S70  |
| 9. X-ray crystal structures.....                                                                 | S106 |
| 10. Energy, geometrical coordinates and vibrational frequencies of the optimized structures..... | S107 |

## 1. General Experimental Details

All reactions were performed under nitrogen using solvents dried by standard methods. NMR spectra were obtained using Bruker AV300 spectrometer. Chemical shifts are expressed in parts per million (ppm) downfield from internal TMS. HRMS spectra were obtained on an Agilent 1290-6540 UHPLC Q-ToF HR-MS spectrometer. X-ray crystallographic analyses were performed on an Oxford diffraction Gemini E diffractometer. Melting Point: heating rate: 4 °C/min, the thermometer was not corrected. Enantiomer excesses were determined by chiral HPLC analysis on Chiralcel IA/OD/AD in comparison with the authentic racemates. Chiral HPLC analysis recorded on Shimadzu labtotal LC-20AT. Silica gel (200-300 mesh) was used for the chromatographic separations. All commercially available reagents were used without further purification.

The DFT calculations were performed using the Gaussian16 program<sup>1</sup>. All structures were optimized at the M06-L<sup>2-4</sup>/6-31G(d, p)/SMD<sub>THF</sub> level, and the corresponding vibrational frequencies were calculated at the same level. Then, frequency calculations at the same level of theory were carried out to identify all of the stationary points as minima (zero imaginary frequency) or transition state (only one frequency), and to provide free energies. The NCI analysis was plotted using Multiwfn<sup>5</sup>.

## References

1. M. J. Frisch, G. W. Trucks, H. B. Schlegel, G. E. Scuseria, M. A. Robb, J. R. Cheeseman, G. Scalmani, V. Barone, G. A. Petersson, H. Nakatsuji, X. Li, M. Caricato, A. V. Marenich, J. Bloino, B. G. Janesko, R. Gomperts, B. Mennucci, H. P. Hratchian, J. V. Ortiz, A. F. Izmaylov, J. L. Sonnenberg, D. Williams-Young, F. Ding, F. Lipparini, F. Egidi, J. Goings, B. Peng, A. Petrone, T. Henderson, D. Ranasinghe, V. G. Zakrzewski, J. Gao, N. Rega, G. Zheng, W. Liang, M. Hada, M. Ehara, K. Toyota, R. Fukuda, J. Hasegawa, M. Ishida, T. Nakajima, Y. Honda, O. Kitao, H. Nakai, T. Vreven, K. Throssell, J. A. Montgomery Jr., J. E. Peralta, F. Ogliaro, M. J.

Bearpark, J. J. Heyd, E. N. Brothers, K. N. Kudin, V. N. Staroverov, T. A. Keith, R. Kobayashi, J. Normand, K. Raghavachari, A. P. Rendell, J. C. Burant, S. S. Iyengar, J. Tomasi, M. Cossi, J. M. Millam, M. Klene, C. Adamo, R. Cammi, J. W. Ochterski, R. L. Martin, K. Morokuma, O. Farkas, J. B. Foresman, D. J. Fox, Gaussian16, Gaussian, Inc., Wallingford, CT, 2016.

2. Y. Zhao, D. G. Truhlar, *Theor. Chem. Acc.* 2008, **120**, 215.
3. Y. T. Zhao, D. G. Truhlar, *J. Chem. Theory Comput.* 2008, **4**, 1849.
4. Y. T. Zhao, D. G. Truhlar, *Acc. Chem. Res.* 2008, **41**, 157.
5. T. Lu, F. Chen, *J. Comput. Chem.*, 2011, **33**, 580.

## 2. General Procedure for the Synthesis of Ligands

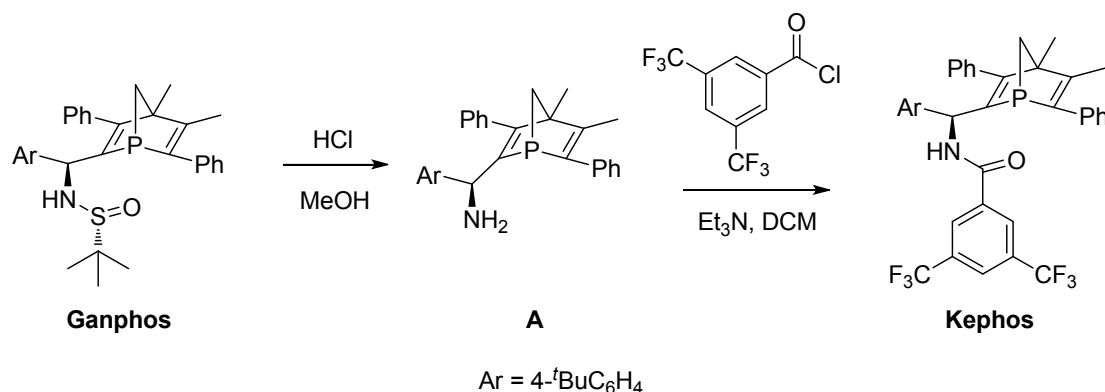

The **Ganphos** was prepared according to the modified procedure of literature.<sup>6</sup>

4 M HCl (4 mmol) was added slowly to the solution of **Ganphos** (0.5 mmol) in MeOH at room temperature and the mixture was stirred for 8 h until completion of the material as indicated by TLC analysis, followed by extracted with aq NaHCO<sub>3</sub> and DCM. The combined organic phases were dried over MgSO<sub>4</sub> and the solvents were removed in vacuo. Residue was directly purified by chromatography to afford **A**. The isolated yield is 74%.

A stirred solution of **A** in DCM was added 3,5-Bis(trifluoromethyl)phenyl isothiocyanate (1.4 eq.) and Et<sub>3</sub>N (2.0 eq) under the protection of N<sub>2</sub>. The mixture was then stirred at room temperature until completion of **A** as indicated by TLC analysis, after completion of the reaction, the reaction mixture was extracted with aq NaHCO<sub>3</sub> and DCM. The organic phases were dried over MgSO<sub>4</sub> and the solvents were directly purified by silica gel chromatography using petroleum ether/EtOAc as the eluent to afford the desired **Kephos** in 80% yield.

6. Z.-J. Gan, M.-N. Zhi, R.-P. Han, E.-Q. Li, Z. Duan, F. Mathey. *Org. Lett.* 2019, **21**, 2782.

### General Data for Kephos

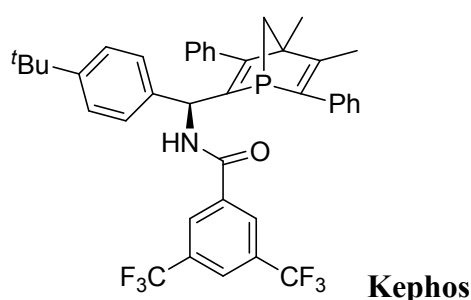

### N-((S)-4-(tert-butyl)phenyl)((1R,4S)-4,5-dimethyl-3,6-diphenyl-1-phosphabicyclo[2.2.1]hepta-2,5-dien-2-yl)methyl)-3,5-bis(trifluoromethyl)benzamide

White solid,  $R_f = 0.38$ . (petroleum ether/ ethyl acetate 5/1). **MP**: 76.5-77.5 °C.  $[\alpha]_D^{25} = 95$  ( $c$  0.16, CH<sub>2</sub>Cl<sub>2</sub>).

<sup>31</sup>P NMR (121 MHz, CDCl<sub>3</sub>)  $\delta$  -18.68 (s) ppm. <sup>1</sup>H NMR (300 MHz, CDCl<sub>3</sub>)  $\delta$  1.31 (s, 9H), 1.35 (s, 3H), 2.08 (s, 3H), 2.17 (dd,  $J = 19.6, 9.8$  Hz, 2H), 5.86 (t,  $J = 7.9$  Hz, 1H), 6.37 (d,  $J = 7.4$  Hz, 1H), 6.78 (t,  $J = 7.3$  Hz, 1H), 6.91 (t,  $J = 7.6$  Hz, 2H), 7.06 (d,  $J = 7.9$  Hz, 2H), 7.11 (d,  $J = 6.4$  Hz, 2H), 7.29 (d,  $J = 7.3$  Hz, 1H), 7.31-7.42 (m, 6H), 7.68 (s, 2H), 7.82 (s, 1H) ppm. <sup>13</sup>C NMR (75 MHz, CDCl<sub>3</sub>)  $\delta$  15.5, 20.5, 31.4, 34.6, 54.7 (d,  $J_{C-P} = 18.8$  Hz), 63.5, 71.4 (d,  $J_{C-P} = 5.2$  Hz), 121.1, 124.6 (d,  $J_{C-F} = 10.6$  Hz), 126.0, 126.1, 126.9 (d,  $J_{C-P} = 2.6$  Hz), 127.4, 127.4, 127.5, 127.8, 128.0,

128.1, 128.4, 131.6 (q,  $J_{C-F} = 33.7$  Hz), 136.1, 137.3, 137.5 (d,  $J_{C-F} = 1.8$  Hz), 138.2 (d,  $J_{C-P} = 20.8$  Hz), 147.9 (d,  $J_{C-P} = 21.7$  Hz), 151.1, 152.8 (d,  $J_{C-P} = 26.4$  Hz), 157.3, 162.4, 163.4 ppm.

### 3. Synthesis of starting materials

#### Synthesis of methyleneindolinone derivatives **1**.<sup>[7]</sup>

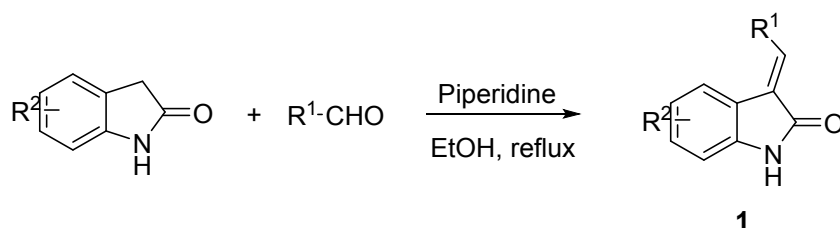

A mixture of oxindole (10 mmol), corresponding aldehyde (11 mmol), and 20 mol% piperidine (2 mmol) were dissolved in 15 mL ethanol. After refluxing for 8 hours, the reaction was cooled to room temperature. Crude product was purified by column chromatography on silica gel to give the compound **1**.

#### Synthesis of glycine imino ester **2**.<sup>7</sup>

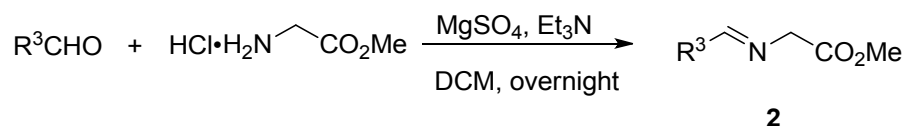

To a suspension of glycine methyl ester hydrochloride (1.1 equiv) and  $MgSO_4$  (2.0 equiv) in DCM was added  $Et_3N$  (1.1 equiv). Then, this solution was stirred at room temperature for 1 h. Subsequently, the aldehyde (1.0 equiv) was added and the reaction was stirred at room temperature overnight. After completion  $MgSO_4$  was removed by filtration and the filtrate was washed with water and extracted with DCM. The combined organic phases were dried over anhydrous  $MgSO_4$ , filtered and dried under reduced pressure.

7. C. Gomez, M. Gicquel, J.-C. Carry, L. Schio, P. Retailleau, A. Voituriez, A. Marinetti, *J. Org. Chem.* **2013**, 78, 1488.

## 4. Reaction Conditions

**Table S1: Optimization Reaction<sup>a</sup>**

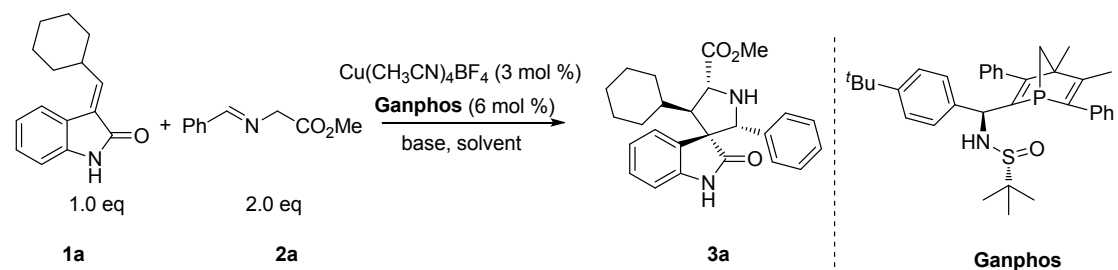

| entry           | solvent                | base                     | yield (%) <sup>b</sup> | dr <sup>c</sup> | ee (%) <sup>d</sup> |
|-----------------|------------------------|--------------------------|------------------------|-----------------|---------------------|
| 1               | THF                    | $\text{Et}_3\text{N}$    | 86                     | 73:27           | 92                  |
| 2               | $\text{Et}_2\text{O}$  | $\text{Et}_3\text{N}$    | 89                     | 80:20           | 64                  |
| 3               | DCM                    | $\text{Et}_3\text{N}$    | trace                  | -               | -                   |
| 4               | $\text{CH}_3\text{CN}$ | $\text{Et}_3\text{N}$    | n.r.                   | -               | -                   |
| 5               | EtOAc                  | $\text{Et}_3\text{N}$    | 96                     | 69:31           | 79                  |
| 6               | MeOH                   | $\text{Et}_3\text{N}$    | 94                     | 96:4            | 78                  |
| 7               | EtOH                   | $\text{Et}_3\text{N}$    | 94                     | >20:1           | 72                  |
| 8               | THF                    | $\text{Cs}_2\text{CO}_3$ | 59                     | 75:25           | 91                  |
| 9               | THF                    | <i>t</i> -BuOK           | 74                     | 76:24           | 80                  |
| 10              | THF                    | $\text{K}_2\text{CO}_3$  | 59                     | 70:30           | 91                  |
| 11              | THF                    | DMAP                     | 49.5                   | 76:24           | 85                  |
| 12              | THF:MeOH/1:1           | $\text{Et}_3\text{N}$    | 72                     | 90:10           | 79                  |
| 13              | THF:MeOH/2:1           | $\text{Et}_3\text{N}$    | 77                     | 89:11           | 76                  |
| 14 <sup>e</sup> | MeOH                   | $\text{Et}_3\text{N}$    | 54                     | 93:7            | 62                  |
| 15 <sup>e</sup> | EtOH                   | $\text{Et}_3\text{N}$    | trace                  | -               | -                   |
| 16 <sup>e</sup> | THF                    | $\text{Et}_3\text{N}$    | 74                     | 85:15           | 95                  |
| 17 <sup>f</sup> | THF                    | $\text{Et}_3\text{N}$    | 77                     | 86:14           | 88                  |
| 18 <sup>g</sup> | THF                    | $\text{Et}_3\text{N}$    | 80                     | 81:19           | 91                  |
| 19 <sup>h</sup> | THF                    | $\text{Et}_3\text{N}$    | 89                     | 80:20           | 89                  |

|                    |            |                        |           |             |           |
|--------------------|------------|------------------------|-----------|-------------|-----------|
| 20 <sup>i</sup>    | THF        | Et <sub>3</sub> N      | 89        | 83:17       | 86        |
| 21 <sup>e, g</sup> | THF        | Et <sub>3</sub> N      | 97        | 89:11       | 93        |
| 22 <sup>e, h</sup> | <b>THF</b> | <b>Et<sub>3</sub>N</b> | <b>80</b> | <b>92:8</b> | <b>95</b> |
| 23 <sup>e, i</sup> | THF        | Et <sub>3</sub> N      | 69        | 92:8        | 92        |

<sup>a</sup> Reaction conditions: **1a** (0.1 mmol), **2a** (0.2 mmol), Cu(MeCN)<sub>4</sub>BF<sub>4</sub> (3 mol%), **L\*** (6 mol%) and base (20 mol%) in solvent (1.0 mL), RT, N<sub>2</sub>, 4 h. <sup>b</sup> Yields of isolated product. <sup>c</sup> Determined by <sup>1</sup>H NMR analysis of the crude mixture. <sup>d</sup> Determined by chiral HPLC analysis. <sup>e</sup> The reaction was performed at -20 °C. <sup>f</sup> MeOH (2.0 eq) in THF (1.0 mL). <sup>g</sup> EtOH (3.0 eq) in THF (1.0 mL). <sup>h</sup> EtOH (4.0 eq) in THF (1.0 mL). <sup>i</sup> EtOH (6.0 eq) in THF (1.0 mL).

**Table S2: Optimization Reaction<sup>a</sup>**

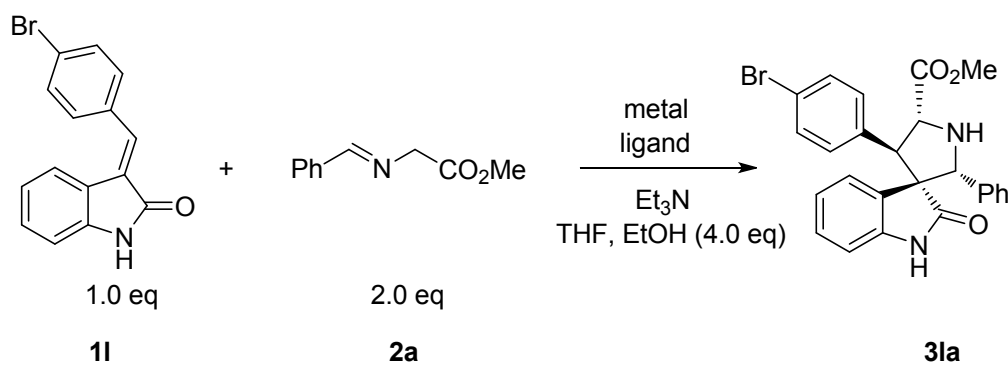

| entry | metal                                     | ligand     | yield (%) <sup>b</sup> | dr <sup>c</sup> | ee (%) <sup>d</sup> |
|-------|-------------------------------------------|------------|------------------------|-----------------|---------------------|
| 1     | Cu(MeCN) <sub>4</sub> BF <sub>4</sub>     | L1         | 53                     | 20:1            | 78                  |
| 2     | <b>Cu(MeCN)<sub>4</sub>BF<sub>4</sub></b> | <b>L11</b> | <b>63</b>              | 20:1            | <b>90</b>           |
| 3     | Cu(MeCN) <sub>4</sub> BF <sub>4</sub>     | L12        | 46                     | 20:1            | 19                  |
| 4     | Cu(MeCN) <sub>4</sub> BF <sub>4</sub>     | L13        | 63                     | 20:1            | 84                  |
| 5     | Cu(MeCN) <sub>4</sub> BF <sub>4</sub>     | L14        | 42                     | 20:1            | 25                  |
| 6     | Cu(MeCN) <sub>4</sub> BF <sub>4</sub>     | L15        | 52                     | 20:1            | 4.4                 |

<sup>a</sup> Reaction conditions: **1a** (0.1 mmol), **2a** (0.2 mmol), Cu(MeCN)<sub>4</sub>BF<sub>4</sub> (3 mol%), L (6 mol%) and Et<sub>3</sub>N (20 mol%) in THF/EtOH (1.0 mL), -20°C, N<sub>2</sub>, 4 h. <sup>b</sup> Yields of isolated product. <sup>c</sup> Determined by <sup>1</sup>H NMR analysis of the crude mixture. <sup>d</sup> Determined by chiral HPLC analysis.

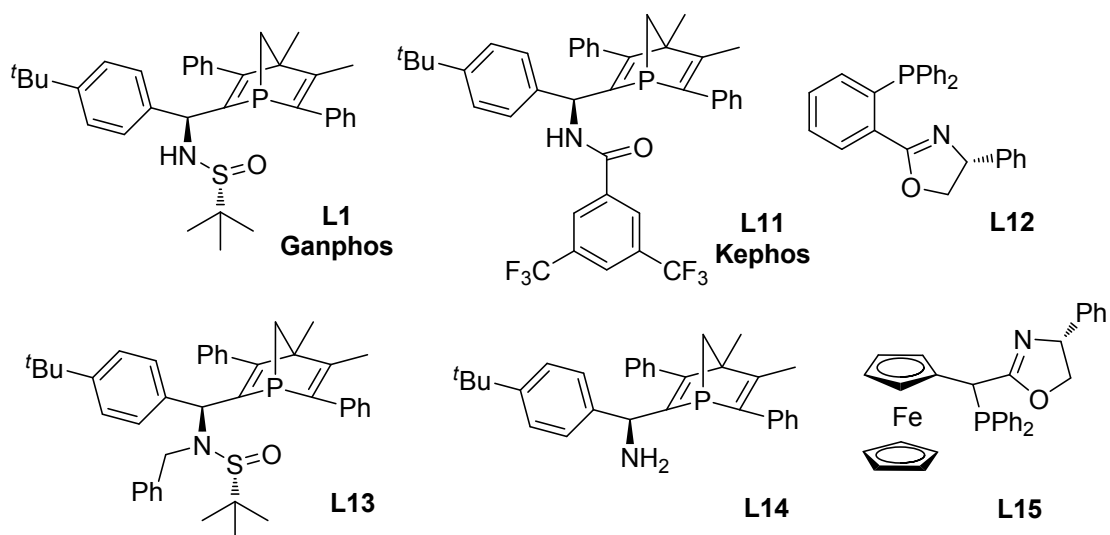

## 5. General Procedure for Reactions

### 1) Procedure A: Synthesis of Chiral spiro[pyrrolidin-3,3'-oxindole]s by Ganphos (3aa-3al)

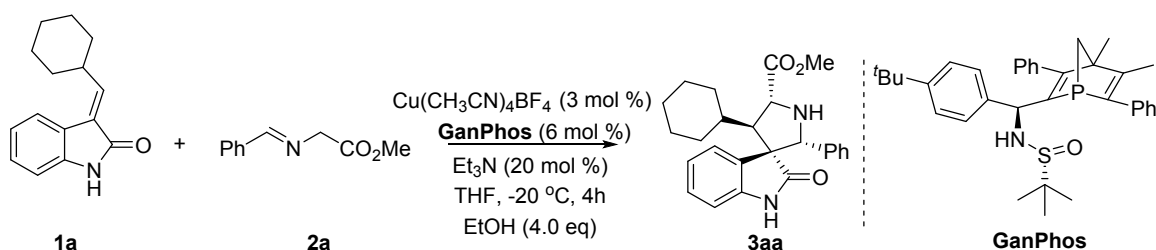

In a Schlenk tube, **Ganphos** (3.3 mg, 0.006 mmol, 6 mol %) and  $\text{Cu}(\text{CH}_3\text{CN})_4\text{BF}_4$  (1.1 mg, 0.003 mmol, 3 mol %) were dissolved in THF (1.0 mL) which have EtOH (4.0 eq) as additive. After being stirred for 1h at room temperature, 3-(cyclohexylmethylene)indolin-2-one **1a** (0.1 mmol), glycine imino ester **2a** (0.2 mmol) and  $\text{Et}_3\text{N}$  (2.8  $\mu\text{L}$ , 0.02 mmol) were added subsequently. The reaction mixture was stirred at  $-20\text{ }^\circ\text{C}$  for 4 h. When the reaction was completed as monitored by TLC, the mixture was concentrated and the residue was purified by column chromatography (eluent: ethyl acetate/petroleum ether = 1:2) to afford the cycloadduct **3aa** in 80% yield (32.0 mg). Chiral **3ab-3al** were synthesized in the same reaction conditions.



## 2) Procedure B: Synthesis Chiral of spiro[pyrrolidin-3,3'-oxindole]s by Kephos (3la-3mm)

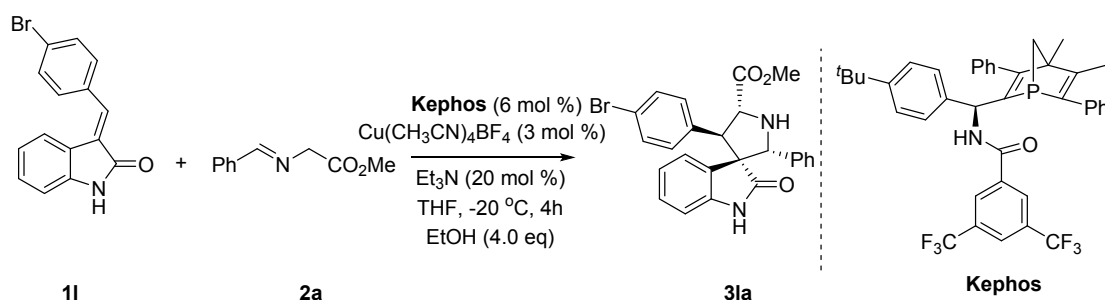

In a Schlenk tube, **Kephos** (4.7 mg, 0.006 mmol, 6 mol %) and  $\text{Cu}(\text{CH}_3\text{CN})_4\text{BF}_4$  (1.1 mg, 0.003 mmol, 3 mol %) were dissolved in THF (1.0 mL) which have EtOH (4.0 eq) as additive. After being stirred for 1h at room temperature, 3-(4-bromobenzylidene)indolin-2-one **11** (0.1 mmol), glycine imino ester **2a** (0.2 mmol) and  $\text{Et}_3\text{N}$  (2.8  $\mu\text{L}$ , 0.02 mmol) were added subsequently. The reaction mixture was stirred at  $-20\text{ }^\circ\text{C}$  for 4 h. When the reaction was completed as monitored by TLC, the mixture was concentrated and the residue was purified by column chromatography (eluent: ethyl acetate/petroleum ether = 1:2) to afford the cycloadduct. Chiral **3lc-3mm** were synthesized in the same reaction conditions.

## 6. Characterization of compounds

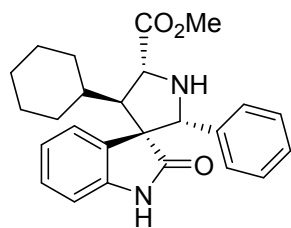

### (2'R, 3S, 4'R, 5'R)-Methyl 4'-cyclohexyl-2-oxo-2'-phenylspiro[indoline-3, 3'-pyrrolidine]-5'-carboxylate (3aa).

White solid (32.0 mg, 80% yield),  $R_f = 0.30$ . (petroleum ether/ ethyl acetate 2/1).

**MP:** 84.8-85.5 °C.  $[\alpha]_D^{25} = +37$  ( $c$  0.23,  $\text{CH}_2\text{Cl}_2$ ).

**$^1\text{H NMR}$**  (300 MHz,  $\text{CDCl}_3$ )  $\delta$  0.70-1.02 (m, 7H), 1.49-1.78 (m, 4H), 2.88 (t,  $J = 9.6$  Hz, 1H), 3.85 (s, 3H), 3.92 (d,  $J = 9.4$  Hz, 1H), 4.41 (s, 1H), 6.74 (d,  $J = 7.6$  Hz, 1H), 6.84 (d,  $J = 6.7$  Hz, 2H), 7.15-7.10 (m, 4H), 7.24 (d,  $J = 7.7$  Hz, 1H), 7.36 (d,  $J = 7.1$  Hz, 1H), 7.77 (s, 1H) ppm.  **$^{13}\text{C NMR}$**  (75 MHz,  $\text{CDCl}_3$ )  $\delta$  25.7, 26.0, 26.2, 30.5, 32.1, 38.2, 52.5, 59.0, 63.1, 66.0, 74.7, 109.8, 122.2, 124.5, 126.2, 127.7, 127.8, 128.1, 130.5, 136.1, 140.9, 173.4, 180.4. ppm. **HRMS** (ESI,  $m/z$ ): Calcd for  $\text{C}_{25}\text{H}_{29}\text{N}_2\text{O}_3$   $[\text{M}+\text{H}]^+$ : 405.2173, found: 405.2172. **HPLC:** The product was analyzed by HPLC to determine the enantiomeric excess: 95% ee (Chiralpak AD-H, hexane/*i*-propanol = 90 : 10, flow rate 1.0 mL/min,  $\lambda = 254$  nm);  $t_r = 20.92$ . and 29.21 min.

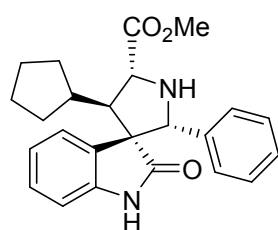

### (2'R, 3S, 4'R, 5'R)-Methyl 4'-cyclopentyl-2-oxo-2'-phenylspiro[indoline-3, 3'-pyrrolidine]-5'-carboxylate (3ba).

White solid (38.2 mg, 98% yield),  $R_f = 0.32$ . (petroleum ether/ ethyl acetate 2/1).

**MP:** 142.8-143.3 °C.  $[\alpha]_D^{25} = +81.3$  ( $c$  0.30,  $\text{CH}_2\text{Cl}_2$ ).

**$^1\text{H NMR}$**  (300 MHz,  $\text{CDCl}_3$ )  $\delta$  0.59-0.90 (m, 2H), 1.07 (dd,  $J = 20.1, 9.8$  Hz, 1H), 1.16-1.41 (m, 4H), 1.83 (dd,  $J = 11.4, 6.4$  Hz, 1H), 1.96 (dd,  $J = 16.8, 7.6$  Hz, 1H),

2.89 (dd,  $J = 10.7, 9.7$  Hz, 1H), 3.19 (br s, 1H), 3.84 (s, 3H), 3.89 (d,  $J = 9.4$  Hz, 1H), 4.48 (s, 1H), 6.74 (d,  $J = 7.6$  Hz, 1H), 6.89 (dd,  $J = 7.5, 1.7$  Hz, 2H), 7.04-7.15 (m, 4H), 7.23 (dd,  $J = 7.7, 1.1$  Hz, 1H), 7.36 (d,  $J = 7.4$  Hz, 1H), 8.26 (s, 1H) ppm.  $^{13}\text{C}$  NMR (75 MHz,  $\text{CDCl}_3$ )  $\delta$  24.4, 25.4, 30.5, 31.4, 41.3, 52.4, 60.5, 63.5, 67.3, 74.1, 109.9, 122.3, 124.4, 126.1, 127.7, 127.9, 128.1, 131.0, 136.4, 141.2, 173.4, 180.8 ppm. **HRMS** (ESI,  $m/z$ ): Calcd for  $\text{C}_{24}\text{H}_{27}\text{N}_2\text{O}_3$   $[\text{M}+\text{H}]^+$ : 391.2016, found: 391.2015. **HPLC**: The product was analyzed by HPLC to determine the enantiomeric excess: 93% ee (Chiralpak AD-H, hexane/*i*-propanol = 90 : 10, flow rate 1.0 mL/min,  $\lambda = 254$  nm);  $t_r = 25.29$ . and 30.14 min.

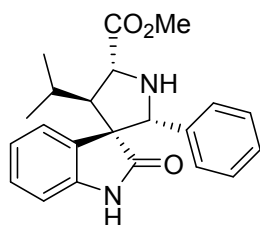

**(2'R, 3S, 4'R, 5'R)-Methyl 4'-isopropyl-2-oxo-2'-phenylspiro[indoline-3, 3'-pyrrolidine]-5'-carboxylate (3ca).**

White solid (33.0 mg, 91% yield),  $R_f = 0.30$ . (petroleum ether/ ethyl acetate 2/1).

**MP**: 71.8-72.4 °C.  $[\alpha]_D^{25} = +77$  ( $c$  0.10,  $\text{CH}_2\text{Cl}_2$ ).

$^1\text{H}$  NMR (300 MHz,  $\text{CDCl}_3$ )  $\delta$  0.41 (d,  $J = 6.4$  Hz, 3H), 0.93 (d,  $J = 6.7$  Hz, 3H), 1.85-1.95 (m, 1H), 2.83 (t,  $J = 9.9$  Hz, 1H), 3.84 (s, 3H), 3.90 (d,  $J = 9.5$  Hz, 1H), 4.43 (s, 1H), 6.75 (d,  $J = 7.6$  Hz, 1H), 6.82-6.88 (m, 2H), 7.14-7.07 (m, 4H), 7.24 (dd,  $J = 7.8, 1.0$  Hz, 1H), 7.35 (d,  $J = 7.3$  Hz, 1H), 8.09 (s, 1H) ppm.  $^{13}\text{C}$  NMR (75 MHz,  $\text{CDCl}_3$ )  $\delta$  20.6, 21.8, 28.7, 52.4, 60.4, 63.2, 66.4, 74.6, 109.9, 122.3, 124.6, 126.2, 127.7, 127.8, 128.1, 130.6, 136.3, 141.1, 173.4, 180.6 ppm. **HRMS** (ESI,  $m/z$ ): Calcd for  $\text{C}_{22}\text{H}_{25}\text{N}_2\text{O}_3$   $[\text{M}+\text{H}]^+$ : 365.1860, found: 365.1857. **HPLC**: The product was analyzed by HPLC to determine the enantiomeric excess: 97% ee (Chiralpak AD-H, hexane/*i*-propanol = 90 : 10, flow rate 1.0 mL/min,  $\lambda = 254$  nm);  $t_r = 24.33$  and 34.26 min.

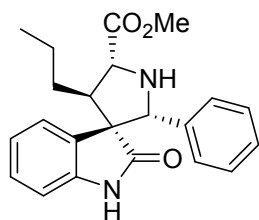

**(2'R, 3S, 4'R, 5'R)-Methyl 2-oxo-2'-phenyl-4'-propylspiro[indoline-3, 3'-pyrrolidine]-5'-carboxylate (3da).**

White solid (33.0 mg, 91% yield),  $R_f = 0.30$ . (petroleum ether/ ethyl acetate 2/1).

**MP:** 65.2-66.0 °C.  $[\alpha]_D^{25} = +31$  ( $c$  0.17,  $\text{CH}_2\text{Cl}_2$ ).

**$^1\text{H NMR}$**  (300 MHz,  $\text{CDCl}_3$ )  $\delta$  0.70 (t,  $J = 7.0$  Hz, 3H), 0.77-0.89 (m, 1H), 1.02-1.16 (m, 1H), 1.48-1.75 (m, 2H), 2.78 (dd,  $J = 15.0, 8.5$  Hz, 1H), 3.44 (br s, 1H), 3.82 (d,  $J = 5.2$  Hz, 1H), 3.86 (s, 3H), 4.47 (s, 1H), 6.72 (d,  $J = 7.7$  Hz, 1H), 6.88 (d,  $J = 1.7$  Hz, 2H), 7.12 (m, 4H), 7.22 (d,  $J = 1.0$  Hz, 1H), 7.36 (d,  $J = 7.4$  Hz, 1H), 7.63 (s, 1H) ppm.  **$^{13}\text{C NMR}$**  (75 MHz,  $\text{CDCl}_3$ )  $\delta$  13.9, 20.7, 33.1, 52.4, 53.3, 62.9, 67.4, 73.2, 109.7, 122.2, 125.0, 126.1, 127.7, 127.9, 128.2, 129.5, 135.8, 141.1, 172.7, 180.3 ppm.

**HRMS** (ESI,  $m/z$ ): Calcd for  $\text{C}_{22}\text{H}_{25}\text{N}_2\text{O}_3$   $[\text{M}+\text{H}]^+$ : 365.1860, found: 365.1858.

**HPLC:** The product was analyzed by HPLC to determine the enantiomeric excess: 85% ee (Chiralpak AD-H, hexane/*i*-propanol = 90 : 10, flow rate 1.0 mL/min,  $\lambda = 254$  nm);  $t_r = 21.71$  and 27.87 min.

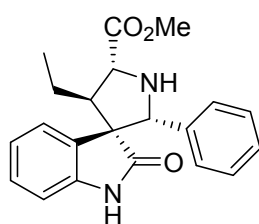

**(2'R, 3S, 4'R, 5'R)-Methyl 4'-ethyl-2-oxo-2'-phenylspiro[indoline-3, 3'-pyrrolidine]-5'-carboxylate (3ea).**

White solid (31 mg, 89% yield),  $R_f = 0.33$ . (petroleum ether/ ethyl acetate 2/1).

**MP:** 69.8-70.2 °C.  $[\alpha]_D^{25} = +24$  ( $c$  0.20,  $\text{CH}_2\text{Cl}_2$ ).

**$^1\text{H NMR}$**  (300 MHz,  $\text{CDCl}_3$ )  $\delta$  0.59 (t,  $J = 7.3$  Hz, 3H), 1.66 (ddd,  $J = 22.2, 14.4, 6.8$  Hz, 2H), 2.68 (dd,  $J = 15.1, 8.3$  Hz, 1H), 3.41 (br s, 1H), 3.81 (d,  $J = 2.6$  Hz, 1H),

3.85 (s, 3H), 4.46 (s, 1H), 6.73 (d,  $J = 7.6$  Hz, 1H), 6.90 (d,  $J = 6.4$  Hz, 2H), 7.03-7.15 (m, 4H), 7.22 (d,  $J = 7.6$  Hz, 1H), 7.35 (d,  $J = 7.4$  Hz, 1H), 8.20 (s, 1H) ppm.  $^{13}\text{C}$  NMR (75 MHz,  $\text{CDCl}_3$ )  $\delta$  12.1, 23.9, 52.4, 55.3, 62.9, 67.2, 73.1, 109.9, 122.2, 124.9, 126.1, 127.7, 127.9, 128.2, 129.5, 136.0, 141.3, 172.7, 180.7 ppm. HRMS (ESI,  $m/z$ ): Calcd for  $\text{C}_{21}\text{H}_{23}\text{N}_2\text{O}_3$   $[\text{M}+\text{H}]^+$ : 351.1703, found: 351.1705. HPLC: The product was analyzed by HPLC to determine the enantiomeric excess: 85% ee (Chiralpak AD-H, hexane/*i*-propanol = 90 : 10, flow rate 1.0 mL/min,  $\lambda = 254$  nm);  $t_r = 28.20$  and 33.27 min.

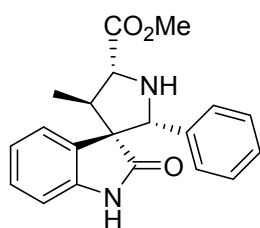

**(2'R, 3S, 4'R, 5'R)-Methyl 4'-methyl-2-oxo-2'-phenylspiro[indoline-3, 3'-pyrrolidine]-5'-carboxylate (3fa).**

White solid (24 mg, 72% yield),  $R_f = 0.36$ . (petroleum ether/ ethyl acetate 2/1).

**MP:** 64.5-65.5 °C.  $[\alpha]_D^{25} = +27$  ( $c$  0.10,  $\text{CH}_2\text{Cl}_2$ ).

$^1\text{H}$  NMR (300 MHz,  $\text{CDCl}_3$ )  $\delta$  1.17 (d,  $J = 7.1$  Hz, 3H) 2.75-2.87 (m, 1H), 3.48 (br s, 1H), 3.78 (d,  $J = 8.1$  Hz, 1H), 3.85 (s, 3H), 4.49 (s, 1H), 6.72 (d,  $J = 7.6$  Hz, 1H), 6.91 (d,  $J = 6.7$  Hz, 2H), 7.03-7.16 (m, 4H), 7.22 (d,  $J = 7.5$  Hz, 1H), 7.35 (d,  $J = 7.3$  Hz, 1H), 8.01 (s, 1H) ppm.  $^{13}\text{C}$  NMR (75 MHz,  $\text{CDCl}_3$ )  $\delta$  16.8, 47.4, 52.3, 63.3, 68.5, 72.3, 109.9, 122.2, 125.2, 126.1, 127.7, 127.9, 128.2, 129.2, 136.1, 141.4, 172.6, 180.3 ppm. HRMS (ESI,  $m/z$ ): Calcd for  $\text{C}_{20}\text{H}_{21}\text{N}_2\text{O}_3$   $[\text{M}+\text{H}]^+$ : 337.1547, found: 337.1549. HPLC: The product was analyzed by HPLC to determine the enantiomeric excess: 70% ee (Chiralpak OD-H, hexane/*i*-propanol = 95 : 5, flow rate 1.0 mL/min,  $\lambda = 254$  nm);  $t_r = 16.27$  and 24.09 min.

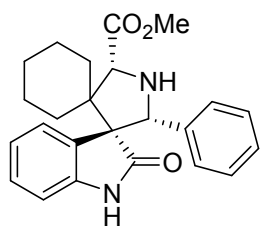

**Methyl (2'R, 4'S, 5'R)-2''-oxo-5'-phenyldispiro[cyclohexane-1,3'-pyrrolidine-4', 3''-indoline]-2'-carboxylate (3ga).**

White solid (36.3 mg, 92% yield),  $R_f = 0.35$ . (petroleum ether/ ethyl acetate 2/1).

**MP:** 170.2-171.6 °C.  $[\alpha]_D^{25} = +40$  ( $c$  0.10,  $\text{CH}_2\text{Cl}_2$ ).

**$^1\text{H}$  NMR** (300 MHz,  $\text{CDCl}_3$ )  $\delta$  1.15 (dd,  $J = 16.0, 6.3$  Hz, 2H), 1.26 (t,  $J = 7.1$  Hz, 1H), 1.44 (dt,  $J = 37.2, 11.1$  Hz, 5H), 1.70 (t,  $J = 12.5$  Hz, 1H), 1.85-1.98 (m, 1H), 3.85 (s, 3H), 3.90 (s, 1H), 4.58 (s, 1H), 6.69 (d,  $J = 7.6$  Hz, 1H), 6.91 (d,  $J = 6.6$  Hz, 2H), 6.96-7.06 (m, 3H), 7.10 (t,  $J = 7.5$  Hz, 1H), 7.23 (t,  $J = 7.6$  Hz, 1H), 7.46 (d,  $J = 7.5$  Hz, 1H), 8.08 (s, 1H) ppm.  **$^{13}\text{C}$  NMR** (75 MHz,  $\text{CDCl}_3$ )  $\delta$  22.7, 23.2, 25.3, 30.0, 36.6, 51.9, 55.5, 67.1, 69.6, 69.8, 109.7, 121.7, 126.3, 126.6, 127.5, 127.7, 128.2, 128.5, 135.9, 141.6, 172.5, 178.1 ppm. **HRMS** (ESI,  $m/z$ ): Calcd for  $\text{C}_{24}\text{H}_{27}\text{N}_2\text{O}_3$   $[\text{M}+\text{H}]^+$ : 391.2016, found: 391.2018. **HPLC:** The product was analyzed by HPLC to determine the enantiomeric excess: 93% ee (Chiralpak OD-H, hexane/*i*-propanol = 95 : 5, flow rate 1.0 mL/min,  $\lambda = 254$  nm);  $t_r = 16.62$  and 24.36min.

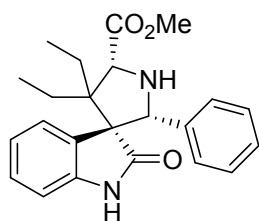

**(2'R, 3S, 5'R)-Methyl 4', 4'-diethyl-2-oxo-2'-phenylspiro[indoline-3, 3'-pyrrolidine]-5'-carboxylate (3ha)**

White solid (22.0 mg, 58% yield),  $R_f = 0.35$ . (petroleum ether/ ethyl acetate 2/1).

**MP:** 89.5-90.2 °C.  $[\alpha]_D^{25} = -33$  ( $c$  0.12,  $\text{CH}_2\text{Cl}_2$ ).

**$^1\text{H}$  NMR** (300 MHz,  $\text{CDCl}_3$ )  $\delta$  0.40 (t,  $J = 7.4$  Hz, 3H), 1.12 (t,  $J = 7.2$  Hz, 3H), 1.64 (dd,  $J = 14.4, 7.4$  Hz, 1H), 1.88 (dd,  $J = 14.4, 7.3$  Hz, 1H), 2.05 (dd,  $J = 14.4, 7.1$  Hz, 2H), 3.84 (s, 3H), 4.01 (s, 1H), 4.52 (s, 1H), 6.61 (d,  $J = 7.5$  Hz, 1H), 6.85 (d,  $J = 7.3$  Hz, 2H), 7.10-7.02 (m, 4H), 7.17 (t,  $J = 7.5$  Hz, 1H), 7.46 (d,  $J = 7.4$  Hz, 1H), 7.61 (s, 1H) ppm.  **$^{13}\text{C}$  NMR** (75 MHz,  $\text{CDCl}_3$ )  $\delta$  8.3, 8.5, 22.0, 29.7, 52.0, 57.9, 67.2, 69.3, 69.8, 109.6, 121.7, 126.5, 127.7, 127.9, 129.2, 134.4, 141.1, 148.3, 171.6, 177.5 ppm. **HRMS** (ESI,  $m/z$ ): Calcd for  $\text{C}_{23}\text{H}_{27}\text{N}_2\text{O}_3$   $[\text{M}+\text{H}]^+$ : 379.2016, found: 379.2013. **HPLC:** The product was analyzed by HPLC to determine the enantiomeric excess: 90%

ee (Chiralpak OD-H, hexane/*i*-propanol = 95 : 5, flow rate 1.0 mL/min,  $\lambda$  = 254 nm);  
tr = 15.03 and 26.41 min.

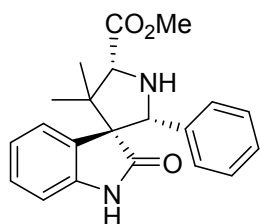

**(2'R, 3S, 5'R)-Methyl 4',4'-dimethyl-2-oxo-2'-phenylspiro[indoline-3, 3'-pyrrolidine]-5'-carboxylate (3ia).**

Colorless oil (24.2 mg, 69% yield),  $R_f$  = 0.35. (petroleum ether/ ethyl acetate 2/1).

$[\alpha]_D^{25} = +16$  ( $c$  0.10,  $\text{CH}_2\text{Cl}_2$ ).

$^1\text{H NMR}$  (300 MHz,  $\text{CDCl}_3$ )  $\delta$  1.01 (s, 3H), 1.47 (s, 3H), 3.83 (s, 3H), 3.88 (s, 1H), 4.59 (s, 1H), 6.69 (d,  $J$  = 7.6 Hz, 1H), 6.95 (d,  $J$  = 6.7 Hz, 2H), 7.12-7.03 (m, 4H), 7.21 (t,  $J$  = 7.7 Hz, 1H), 7.41 (d,  $J$  = 7.4 Hz, 1H), 7.80 (s, 1H) ppm.  $^{13}\text{C NMR}$  (75 MHz,  $\text{CDCl}_3$ )  $\delta$  21.74, 30.6, 50.7, 51.9, 67.1, 68.6, 71.0, 109.7, 121.8, 126.2, 126.4, 127.5, 127.5, 127.8, 128.3, 135.7, 141.9, 171.6, 178.2 ppm. **HRMS** (ESI,  $m/z$ ): Calcd for  $\text{C}_{21}\text{H}_{23}\text{N}_2\text{O}_3$   $[\text{M}+\text{H}]^+$ : 351.1703, found: 351.1702. **HPLC**: The product was analyzed by HPLC to determine the enantiomeric excess: 90% ee (Chiralpak OD-H, hexane/*i*-propanol = 90 : 10, flow rate 1.0 mL/min,  $\lambda$  = 254 nm); tr = 7.48 and 10.53 min.

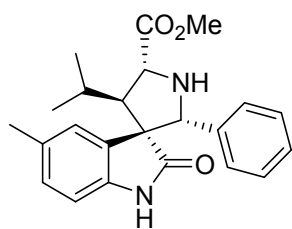

**(2'R, 3S, 4'R, 5'R)-Methyl 4'-isopropyl-5-methyl-2-oxo-2'-phenylspiro[indoline-3, 3'-pyrrolidine]-5'-carboxylate (3ja).**

White solid (24.0 mg, 64% yield),  $R_f$  = 0.32. (petroleum ether/ ethyl acetate 2/1).

**MP**: 126.0-126.6°C.  $[\alpha]_D^{25} = +78$  ( $c$  0.12,  $\text{CH}_2\text{Cl}_2$ ).

**<sup>1</sup>H NMR** (300 MHz, CDCl<sub>3</sub>) δ 0.42 (d, *J* = 6.4 Hz, 3H), 0.93 (d, *J* = 6.7 Hz, 3H), 1.81-1.95 (m, 1H), 2.42 (s, 3H), 2.82 (t, *J* = 10.0 Hz, 1H), 3.10 (br s, 1H), 3.84 (s, 3H), 3.89 (d, *J* = 9.7 Hz, 1H), 4.42 (s, 1H), 6.64 (d, *J* = 7.9 Hz, 1H), 6.86 (dd, *J* = 7.5, 1.6 Hz, 2H), 7.11-7.04 (m, 4H), 7.15 (s, 1H), 7.87 (s, 1H) ppm. **<sup>13</sup>C NMR** (75 MHz, CDCl<sub>3</sub>) δ 20.8, 21.4, 21.8, 28.7, 52.4, 60.5, 63.3, 66.5, 74.7, 109.6, 125.3, 126.2, 127.6, 127.8, 128.5, 130.8, 131.7, 136.5, 138.6, 173.5, 180.5 ppm. **HRMS** (ESI, *m/z*): Calcd for C<sub>23</sub>H<sub>27</sub>N<sub>2</sub>O<sub>3</sub> [M+H]<sup>+</sup>: 379.2016, found: 379.2018. **HPLC**: The product was analyzed by HPLC to determine the enantiomeric excess: 83% ee (Chiralpak AD-H, hexane/*i*-propanol = 90 : 10, flow rate 1.0 mL/min, λ = 254 nm); tr = 16.56 and 28.54 min.

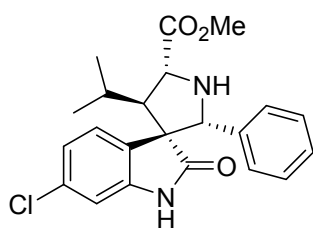

**(2'*R*, 3*S*, 4'*R*, 5'*R*)-Methyl 6-chloro-4'-isopropyl-2-oxo-2'-phenylspiro[indoline-3, 3'-pyrrolidine]-5'-carboxylate (3ka).**

White solid (35.0 mg, 88% yield), *R<sub>f</sub>* = 0.32. (petroleum ether/ ethyl acetate 2/1).

**MP**: 187.5-188.0 °C. [α]<sub>D</sub><sup>25</sup> = -95 (*c* 0.12, CH<sub>2</sub>Cl<sub>2</sub>).

**<sup>1</sup>H NMR** (300 MHz, CDCl<sub>3</sub>) δ 0.43 (d, *J* = 6.5 Hz, 3H), 0.91 (d, *J* = 6.6 Hz, 3H), 1.98-2.14 (m, 1H), 2.95 (dd, *J* = 10.7, 6.9 Hz, 1H), 3.61 (br s, 1H), 3.80 (s, 3H), 4.10 (d, *J* = 6.9 Hz, 1H), 4.68 (s, 1H), 6.65 (d, *J* = 1.4 Hz, 1H), 6.82 (d, *J* = 7.3 Hz, 2H), 7.03-7.16 (m, 4H), 7.37 (d, *J* = 8.0 Hz, 1H), 7.88 (s, 1H) ppm. **<sup>13</sup>C NMR** (75 MHz, CDCl<sub>3</sub>) δ 21.8, 22.3, 30.1, 52.5, 59.9, 63.8, 64.3, 73.2, 110.3, 122.6, 123.3, 126.1, 127.9, 128.1, 129.2, 133.5, 134.1, 141.6, 175.6, 177.7 ppm. **HRMS** (ESI, *m/z*): Calcd for C<sub>22</sub>H<sub>24</sub>ClN<sub>2</sub>O<sub>3</sub> [M+H]<sup>+</sup>: 399.1470, found: 399.1473. **HPLC**: The product was analyzed by HPLC to determine the enantiomeric excess: 84% ee (Chiralpak OD-H, hexane/*i*-propanol = 95 : 5, flow rate 1.0 mL/min, λ = 254 nm); tr = 9.98 and 12.07 min.



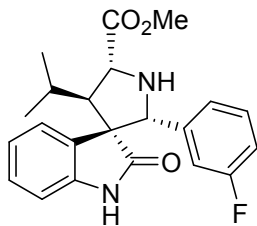

**(2'R, 3S, 4'R, 5'R)-Methyl 2'-(3-fluorophenyl)-4'-isopropyl-2-oxospiro[indoline-3, 3'-pyrrolidine]-5'-carboxylate (3ab)**

White solid (24.0 mg, 66% yield),  $R_f = 0.32$ . (petroleum ether/ ethyl acetate 2/1).

**MP:** 52.4-53.2 °C.  $[\alpha]_D^{25} = +69$  ( $c$  0.12,  $\text{CH}_2\text{Cl}_2$ ).

**$^1\text{H}$  NMR** (300 MHz,  $\text{CDCl}_3$ )  $\delta$  0.42 (d,  $J = 6.4$  Hz, 3H), 0.93 (d,  $J = 6.7$  Hz, 3H), 1.83-1.95 (m, 1H), 2.83 (t,  $J = 9.9$  Hz, 1H), 3.04 (br s, 1H), 3.85 (s, 3H), 3.90 (d,  $J = 9.6$  Hz, 1H), 4.42 (s, 1H), 6.64 (dd,  $J = 9.6, 1.9$  Hz, 2H), 6.76-6.86 (m, 2H), 7.04 (td,  $J = 8.0, 6.1$  Hz, 1H), 7.13 (td,  $J = 7.6, 1.0$  Hz, 1H), 7.24-7.31 (m, 1H), 7.34 (d,  $J = 7.5$  Hz, 1H), 8.04 (s, 1H) ppm.  **$^{13}\text{C}$  NMR** (75 MHz,  $\text{CDCl}_3$ )  $\delta$  20.6, 21.8, 28.7, 52.5, 60.2, 63.0, 66.3, 73.8, 110.0, 113.4 (d,  $J_{\text{C-F}} = 22.5$  Hz), 114.6 (d,  $J_{\text{C-F}} = 21.0$  Hz), 121.8 (d,  $J_{\text{C-F}} = 2.8$  Hz), 122.5, 124.6, 128.4, 129.3 (d,  $J_{\text{C-F}} = 8.2$  Hz), 130.3, 139.2 (d,  $J_{\text{C-F}} = 7.3$  Hz), 141.0, 162.3 (d,  $J_{\text{C-F}} = 245.4$  Hz), 173.3, 180.3 ppm. **HRMS** (ESI,  $m/z$ ): Calcd for  $\text{C}_{22}\text{H}_{24}\text{FN}_2\text{O}_3$   $[\text{M}+\text{H}]^+$ : 383.1765, found: 383.1763. **HPLC:** The product was analyzed by HPLC to determine the enantiomeric excess: 90% ee (Chiralpak AD-H, hexane/*i*-propanol = 90 : 10, flow rate 1.0 mL/min,  $\lambda = 254$  nm);  $t_r = 20.94$  and 32.37 min.

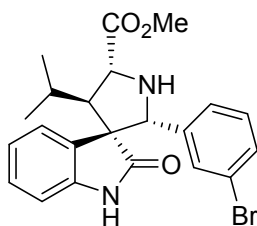

**(2'R, 3S, 4'R, 5'R)-Methyl 2'-(3-bromophenyl)-4'-isopropyl-2-oxospiro[indoline-3, 3'-pyrrolidine]-5'-carboxylate (3ac).**

White solid (34.0 mg, 79% yield),  $R_f = 0.33$ . (petroleum ether/ ethyl acetate 2/1).

**MP:** 106.5-107.2 °C.  $[\alpha]_D^{25} = +86$  ( $c$  0.10,  $\text{CH}_2\text{Cl}_2$ ).

**<sup>1</sup>H NMR** (300 MHz, CDCl<sub>3</sub>) δ 0.43 (d, *J* = 6.4 Hz, 3H), 0.92 (d, *J* = 6.7 Hz, 3H), 1.83-1.93 (m, 1H), 2.84 (t, *J* = 9.9 Hz, 1H), 3.02 (br s, 1H), 3.85 (s, 3H), 3.90 (d, *J* = 9.6 Hz, 1H), 4.39 (s, 1H), 6.91-6.78 (m, 2H), 6.93 (t, *J* = 7.9 Hz, 1H), 7.06-7.17 (m, 2H), 7.36-7.23 (m, 3H), 8.17 (s, 1H) ppm. **<sup>13</sup>C NMR** (75 MHz, CDCl<sub>3</sub>) δ 20.6, 21.8, 28.7, 52.5, 56.0, 63.0, 66.3, 73.6, 110.2, 122.0, 122.5, 124.5, 124.9, 128.4, 129.4, 129.5, 130.3, 130.8, 139.1, 141.0, 173.3, 180.2 ppm. **HRMS** (ESI, *m/z*): Calcd for C<sub>22</sub>H<sub>24</sub>BrN<sub>2</sub>O<sub>3</sub> [M+H]<sup>+</sup>: 443.0965, found: 443.0964. **HPLC**: The product was analyzed by HPLC to determine the enantiomeric excess: 92% ee (Chiralpak AD-H, hexane/*i*-propanol = 90 : 10, flow rate 1.0 mL/min, λ = 254 nm); tr = 21.83 and 33.31 min.

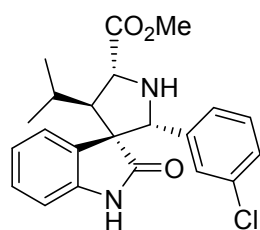

**(2'*R*, 3*S*, 4'*R*, 5'*R*)-Methyl 2'-(3-chlorophenyl)-4'-isopropyl-2-oxospiro[indoline-3, 3'-pyrrolidine]-5'-carboxylate (3ad).**

White solid (36.2 mg, 91% yield), *R<sub>f</sub>* = 0.31. (petroleum ether/ ethyl acetate 2/1).

**MP:** 104.2-105.0 °C. [α]<sub>D</sub><sup>25</sup> = +112 (*c* 0.15, CH<sub>2</sub>Cl<sub>2</sub>).

**<sup>1</sup>H NMR** (300 MHz, CDCl<sub>3</sub>) δ 0.42 (d, *J* = 6.4 Hz, 3H), 0.92 (d, *J* = 6.7 Hz, 3H), 1.81-1.94 (m, 1H), 2.83 (t, *J* = 9.9 Hz, 1H), 3.02 (br s, 1H), 3.85 (s, 3H), 3.90 (d, *J* = 9.6 Hz, 1H), 4.40 (s, 1H), 6.72 (d, *J* = 7.7 Hz, 1H), 6.81 (d, *J* = 7.6 Hz, 1H), 7.01-6.94 (m, 2H), 7.07-7.17 (m, 2H), 7.24-7.31 (m, 1H), 7.34 (d, *J* = 7.4 Hz, 1H), 8.29 (s, 1H) ppm. **<sup>13</sup>C NMR** (75 MHz, CDCl<sub>3</sub>) δ 20.6, 21.8, 28.7, 52.5, 56.0, 63.0, 66.2, 73.7, 110.2, 122.5, 124.4, 124.5, 126.6, 127.8, 128.4, 129.1, 130.3, 133.7, 138.8, 141.0, 173.3, 180.4 ppm. **HRMS** (ESI, *m/z*): Calcd for C<sub>22</sub>H<sub>24</sub>ClN<sub>2</sub>O<sub>3</sub> [M+H]<sup>+</sup>: 399.1470, found: 399.1468. **HPLC**: The product was analyzed by HPLC to determine the enantiomeric excess: 89% ee (Chiralpak AD-H, hexane/*i*-propanol = 90 : 10, flow rate 1.0 mL/min, λ = 254 nm); tr = 19.96 and 30.63 min.

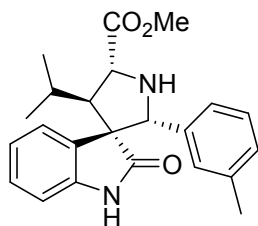

**(2'R, 3S, 4'R, 5'R)-Methyl 4'-isopropyl-2'-oxo-2'-(m-tolyl)spiro[indoline-3, 3'-pyrrolidine]-5'-carboxylate (3ae).**

white solid (32.0 mg, 85% yield),  $R_f = 0.32$ . (petroleum ether/ ethyl acetate 2/1).

**MP:** 62.2-62.8 °C.  $[\alpha]_D^{25} = +30$  ( $c$  0.21,  $\text{CH}_2\text{Cl}_2$ )

$^1\text{H NMR}$  (300 MHz,  $\text{CDCl}_3$ )  $\delta$  0.40 (d,  $J = 6.4$  Hz, 3H), 0.92 (d,  $J = 6.6$  Hz, 3H), 1.89 (qd,  $J = 13.0, 6.5$  Hz, 1H), 2.13 (s, 3H), 2.81 (t,  $J = 9.9$  Hz, 1H), 3.14 (br s, 1H), 3.83 (s, 3H), 3.88 (d,  $J = 9.5$  Hz, 1H), 4.39 (s, 1H), 6.56 (d,  $J = 3.5$  Hz, 1H), 6.69-6.82 (m, 2H), 6.91 (d,  $J = 4.8$  Hz, 2H), 7.11 (t,  $J = 7.4$  Hz, 1H), 7.23 (d,  $J = 7.6$  Hz, 1H), 7.34 (d,  $J = 7.4$  Hz, 1H), 8.41 (s, 1H) ppm.  $^{13}\text{C NMR}$  (75 MHz,  $\text{CDCl}_3$ )  $\delta$  20.6, 21.3, 21.8, 28.6, 52.4, 60.5, 63.2, 66.2, 74.4, 109.9, 122.1, 123.2, 124.5, 126.8, 127.6, 128.0, 128.3, 130.6, 136.1, 137.2, 141.3, 173.4, 180.8 ppm. **HRMS** (ESI,  $m/z$ ): Calcd for  $\text{C}_{23}\text{H}_{27}\text{N}_2\text{O}_3$   $[\text{M}+\text{H}]^+$ : 379.2016, found: 379.2019. **HPLC:** The product was analyzed by HPLC to determine the enantiomeric excess: 96% ee (Chiralpak AD-H, hexane/*i*-propanol = 90 : 10, flow rate 1.0 mL/min,  $\lambda = 254$  nm);  $t_r = 19.16$  and 22.54 min.

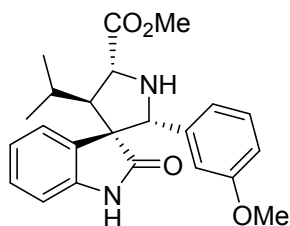

**(2'R, 3S, 4'R, 5'R)-Methyl 4'-isopropyl-2'-(3-methoxyphenyl)-2-oxospiro[indoline-3,3'-pyrrolidine]-5'-carboxylate (3af).**

White solid (32.4 mg, 82% yield),  $R_f = 0.33$ . (petroleum ether/ ethyl acetate 2/1).

**MP:** 59.1-59.8 °C.  $[\alpha]_D^{25} = +56$  ( $c$  0.26,  $\text{CH}_2\text{Cl}_2$ ).

$^1\text{H NMR}$  (300 MHz,  $\text{CDCl}_3$ )  $\delta$  0.42 (d,  $J = 6.4$  Hz, 3H), 0.93 (d,  $J = 6.6$  Hz, 3H), 1.82-1.96 (m, 1H), 2.82 (t,  $J = 9.9$  Hz, 1H), 3.12 (br s, 1H), 3.54 (s, 3H), 3.84 (s, 3H),

3.89 (d,  $J = 9.5$  Hz, 1H), 4.41 (s, 1H), 6.39 (s, 1H), 6.45 (d,  $J = 7.6$  Hz, 1H), 6.65 (dd,  $J = 8.1, 2.2$  Hz, 1H), 6.77 (d,  $J = 7.6$  Hz, 1H), 6.97 (t,  $J = 7.9$  Hz, 1H), 7.11 (t,  $J = 7.4$  Hz, 1H), 7.20-7.26 (m, 1H), 7.34 (d,  $J = 7.4$  Hz, 1H), 8.22 (s, 1H) ppm.  $^{13}\text{C}$  NMR (75 MHz,  $\text{CDCl}_3$ )  $\delta$  20.6, 21.9, 28.7, 52.4, 54.9, 60.4, 63.2, 66.3, 74.5, 110.0, 111.3, 113.8, 118.4, 122.3, 124.6, 128.1, 128.8, 130.6, 137.9, 141.3, 159.0, 173.4, 180.7 ppm.

**HRMS** (ESI,  $m/z$ ): Calcd for  $\text{C}_{23}\text{H}_{27}\text{N}_2\text{O}_4$   $[\text{M}+\text{H}]^+$ : 395.1965, found: 399.1964.

**HPLC**: The product was analyzed by HPLC to determine the enantiomeric excess: 92% ee (Chiralpak AD-H, hexane/*i*-propanol = 90 : 10, flow rate 1.0 mL/min,  $\lambda = 254$  nm);  $t_r = 36.90$  and 42.24 min.

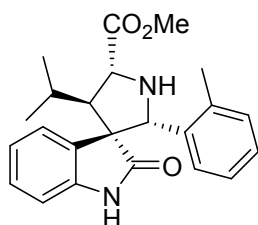

**(2'R, 3S, 4'R, 5'R)-Methyl 4'-isopropyl-2-oxo-2'-(*o*-tolyl)spiro[indoline-3,3'-pyrrolidine]-5'-carboxylate (3ag).**

White solid (20.0 mg, 53% yield),  $R_f = 0.32$ . (petroleum ether/ ethyl acetate 2/1).

**MP**: 177.0-177.6 °C.  $[\alpha]_D^{25} = -118$  ( $c$  0.16,  $\text{CH}_2\text{Cl}_2$ ).

$^1\text{H}$  NMR (300 MHz,  $\text{CDCl}_3$ )  $\delta$  0.39 (d,  $J = 6.5$  Hz, 3H), 0.91 (d,  $J = 6.5$  Hz, 3H), 1.83 (s, 3H), 2.07-2.20 (m, 1H), 3.03 (dd,  $J = 10.6, 7.2$  Hz, 1H), 3.43 (br s, 1H), 3.81 (s, 3H), 4.15 (d,  $J = 7.1$  Hz, 1H), 5.11 (s, 1H), 6.61 (d,  $J = 7.5$  Hz, 1H), 6.86 (d,  $J = 4.0$  Hz, 1H), 6.94-7.00 (m, 2H), 7.03 (d,  $J = 7.4$  Hz, 1H), 7.10 (d,  $J = 7.3$  Hz, 1H), 7.47 (t,  $J = 8.5$  Hz, 2H), 8.18 (s, 1H) ppm.  $^{13}\text{C}$  NMR (75 MHz,  $\text{CDCl}_3$ )  $\delta$  19.7, 21.7, 22.4, 30.0, 52.4, 59.6, 64.0, 64.4, 68.0, 109.7, 122.1, 123.1, 125.7, 125.8, 127.6, 127.9, 130.2, 130.3, 133.2, 136.9, 140.4, 175.9, 178.4 ppm. **HRMS** (ESI,  $m/z$ ): Calcd for  $\text{C}_{23}\text{H}_{27}\text{N}_2\text{O}_3$   $[\text{M}+\text{H}]^+$ : 379.2016, found: 379.2018. **HPLC**: The product was analyzed by HPLC to determine the enantiomeric excess: 72% ee (Chiralpak AD-H, hexane/*i*-propanol = 95 : 5, flow rate 1.0 mL/min,  $\lambda = 254$  nm);  $t_r = 30.08$  and 32.47 min.

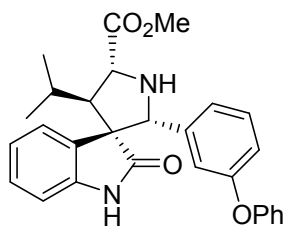

**(2'R, 3S, 4'R, 5'R)-Methyl 4'-isopropyl-2-oxo-2'-(3-phenoxyphenyl)spiro-[indoline-3,3'-pyrrolidine]-5'-carboxylate (3ah).**

White solid (33.0 mg, 72% yield),  $R_f = 0.32$ . (petroleum ether/ ethyl acetate 2/1).

**MP:** 65.0-66.0 °C.  $[\alpha]_D^{25} = +98$  ( $c$  0.17,  $\text{CH}_2\text{Cl}_2$ ).

**$^1\text{H}$  NMR** (300 MHz,  $\text{CDCl}_3$ )  $\delta$  0.40 (d,  $J = 6.4$  Hz, 3H), 0.91 (d,  $J = 6.7$  Hz, 3H), 1.82-1.93 (m, 1H), 2.81 (t,  $J = 9.9$  Hz, 1H), 3.07 (br s, 1H), 3.81 (s, 3H), 3.88 (d,  $J = 9.5$  Hz, 1H), 4.40 (s, 1H), 6.49 (s, 1H), 6.73 (t,  $J = 8.3$  Hz, 2H), 6.78 (d,  $J = 7.8$  Hz, 3H), 7.06 (t,  $J = 7.7$  Hz, 3H), 7.16-7.25 (m, 3H), 7.29 (d,  $J = 7.7$  Hz, 1H), 8.28 (s, 1H) ppm.  **$^{13}\text{C}$  NMR** (75 MHz,  $\text{CDCl}_3$ )  $\delta$  20.6, 21.8, 28.7, 52.4, 60.4, 63.1, 66.3, 74.2, 110.1, 117.3, 118.5, 118.6, 121.1, 122.4, 122.9, 124.5, 128.2, 129.3, 129.6, 130.4, 138.4, 141.1, 156.4, 157.2, 173.3, 180.6 ppm. **HRMS** (ESI,  $m/z$ ): Calcd for  $\text{C}_{28}\text{H}_{29}\text{N}_2\text{O}_4$   $[\text{M}+\text{H}]^+$ : 457.2122, found: 457.2124. **HPLC:** The product was analyzed by HPLC to determine the enantiomeric excess: 92% ee (Chiralpak AD-H, hexane/*i*-propanol = 90:10, flow rate 1.0 mL/min,  $\lambda = 254$  nm);  $t_r = 32.42$  and 36.80 min.

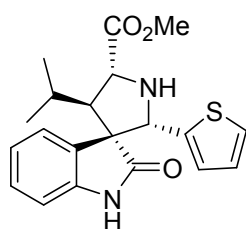

**(2'S, 3S, 4'R, 5'R)-Methyl 4'-isopropyl-2-oxo-2'-(thiophen-2-yl)spiro[indoline-3,3'-pyrrolidine]-5'-carboxylate (3ai).**

White solid; (25.0 mg, 68% yield),  $R_f = 0.32$ . (petroleum ether/ ethyl acetate 2/1).

**MP:** 65.2-66.0 °C.  $[\alpha]_D^{25} = +18$  ( $c$  0.18,  $\text{CH}_2\text{Cl}_2$ ).

**$^1\text{H}$  NMR** (300 MHz,  $\text{CDCl}_3$ )  $\delta$  0.44 (d,  $J = 6.4$  Hz, 3H), 0.94 (d,  $J = 6.6$  Hz, 3H), 1.83-1.95 (m, 1H), 2.85 (t,  $J = 9.5$  Hz, 1H), 3.22 (br s, 1H), 3.84 (s, 3H), 3.90 (d,  $J =$

9.0 Hz, 1H), 4.64 (s, 1H), 6.61 (d,  $J = 3.2$  Hz, 1H), 6.69-6.77 (m, 1H), 6.83 (d,  $J = 7.6$  Hz, 1H), 6.99 (d,  $J = 4.8$  Hz, 1H), 7.10 (t,  $J = 7.4$  Hz, 1H), 7.29 (dd,  $J = 11.9, 5.0$  Hz, 2H), 8.44 (s, 1H) ppm.  $^{13}\text{C}$  NMR (75 MHz,  $\text{CDCl}_3$ )  $\delta$  20.6, 21.9, 28.8, 52.5, 60.3, 62.9, 66.1, 70.4, 110.2, 122.4, 124.0, 124.2, 124.6, 126.5, 128.4, 129.7, 139.2, 141.6, 173.0, 180.9 ppm. **HRMS** (ESI,  $m/z$ ): Calcd for  $\text{C}_{20}\text{H}_{23}\text{N}_2\text{O}_3\text{S}$   $[\text{M}+\text{H}]^+$ : 371.1424, found: 371.1426. **HPLC**: The product was analyzed by HPLC to determine the enantiomeric excess: 91% ee (Chiralpak AD-H, hexane/*i*-propanol = 90 : 10, flow rate 1.0 mL/min,  $\lambda = 254$  nm,  $t_r = 31.21$  and 38.19 min.).

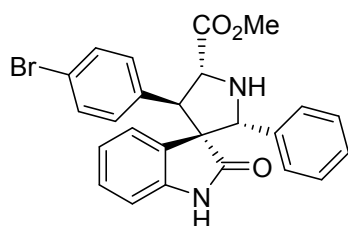

**(2'R, 3S, 4'R, 5'R)-Methyl 4'-(4-bromophenyl)-2-oxo-2'-phenylspiro[indoline-3,3'-pyrrolidine]-5'-carboxylate (3la).**

White solid; (30.0 mg, 63% yield),  $R_f = 0.32$ . (petroleum ether/ ethyl acetate 2/1).

**MP**: 165.2-166.0 °C.  $[\alpha]_D^{25} = +165$  ( $c$  0.13,  $\text{CH}_2\text{Cl}_2$ ).

$^1\text{H}$  NMR (300 MHz,  $\text{CDCl}_3$ )  $\delta$  3.81 (s, 3H), 4.10 (d,  $J = 5.6$  Hz, 1H), 4.51 (d,  $J = 5.5$  Hz, 1H), 4.68 (s, 1H), 6.25 (d,  $J = 7.5$  Hz, 1H), 6.58 (d,  $J = 7.7$  Hz, 1H), 6.77 (t,  $J = 7.5$  Hz, 1H), 6.94 (d,  $J = 7.3$  Hz, 2H), 7.00-7.16 (m, 6H), 7.40 (d,  $J = 8.3$  Hz, 2H), 8.10 (s, 1H) ppm.  $^{13}\text{C}$  NMR (75 MHz,  $\text{CDCl}_3$ )  $\delta$  52.6, 56.8, 64.0, 65.9, 72.5, 109.5, 121.4, 122.1, 125.0, 126.3, 127.6, 128.0, 128.1, 128.2, 130.5, 131.6, 135.6, 137.8, 141.0, 172.8, 179.5 ppm. **HRMS** (ESI,  $m/z$ ): Calcd for  $\text{C}_{25}\text{H}_{22}\text{BrN}_2\text{O}_3$   $[\text{M}+\text{H}]^+$ : 477.0808, found: 477.0811. **HPLC**: The product was analyzed by HPLC to determine the enantiomeric excess: 90% ee (Chiralpak AD-H, hexane/*i*-propanol = 90 : 10, flow rate 1.0 mL/min,  $\lambda = 254$  nm,  $t_r = 24.16$  and 28.61 min.).

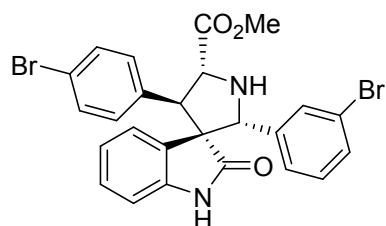

**(2'R, 3S, 4'R, 5'R)-Methyl 2'-(3-bromophenyl)-4'-(4-bromophenyl)-2-oxospiro-[indoline-3,3'-pyrrolidine]-5'-carboxylate (3lc).**

White solid; (34.0 mg, 61% yield),  $R_f = 0.30$ . (petroleum ether/ ethyl acetate 2/1).

**MP:** 103.5-104.2 °C.  $[\alpha]_D^{25} = +61$  ( $c$  0.10,  $\text{CH}_2\text{Cl}_2$ ).

**$^1\text{H}$  NMR** (300 MHz,  $\text{CDCl}_3$ )  $\delta$  3.57 (br s, 1H), 3.82 (s, 3H), 4.11 (d,  $J = 6.0$  Hz, 1H), 4.52 (d,  $J = 5.7$  Hz, 1H), 4.64 (s, 1H), 6.29 (d,  $J = 7.5$  Hz, 1H), 6.64 (d,  $J = 7.8$  Hz, 1H), 6.81 (t,  $J = 7.5$  Hz, 1H), 6.88-7.01 (m, 2H), 7.03-7.15 (m, 4H), 7.29 (d,  $J = 7.7$  Hz, 1H), 7.41 (d,  $J = 8.4$  Hz, 2H), 7.61 (s, 1H) ppm.  **$^{13}\text{C}$  NMR** (75 MHz,  $\text{CDCl}_3$ )  $\delta$  52.6, 56.7, 63.8, 65.7, 71.8, 109.6, 120.8, 121.5, 122.2, 122.4, 124.9, 125.0, 127.4, 128.5, 129.6, 130.5, 131.1, 131.6, 137.4, 138.3, 140.7, 172.6, 178.7 ppm. **HRMS** (ESI,  $m/z$ ): Calcd for  $\text{C}_{25}\text{H}_{21}\text{Br}_2\text{N}_2\text{O}_3$   $[\text{M}+\text{H}]^+$ : 554.9913, found: 554.9915. **HPLC:** The product was analyzed by HPLC to determine the enantiomeric excess: 86% ee (Chiralpak IA-H, hexane/*i*-propanol = 90 : 10, flow rate 1.0 mL/min,  $\lambda = 254$  nm,  $t_r = 19.56$  and 26.06 min.).

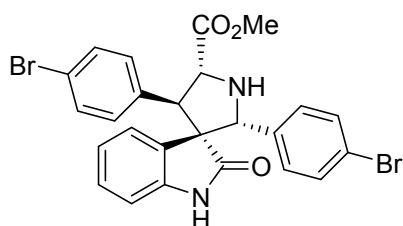

**(2'R, 3S, 4'R, 5'R)-Methyl 2',4'-bis(4-bromophenyl)-2-oxospiro[indoline-3,3'-pyrrolidine]-5'-carboxylate (3lj).**

White solid; (50.0 mg, 90% yield),  $R_f = 0.30$ . (petroleum ether/ ethyl acetate 2/1).

**MP:** 124.3-125.2 °C.  $[\alpha]_D^{25} = +142$  ( $c$  0.18,  $\text{CH}_2\text{Cl}_2$ ).

**$^1\text{H}$  NMR** (300 MHz,  $\text{CDCl}_3$ )  $\delta$  3.80 (s, 3H), 4.09 (d,  $J = 5.8$  Hz, 1H), 4.51 (d,  $J = 5.8$  Hz, 1H), 4.64 (s, 1H), 6.29 (d,  $J = 7.5$  Hz, 1H), 6.61 (d,  $J = 7.7$  Hz, 1H), 6.81 (dd,  $J = 12.7, 8.0$  Hz, 3H), 7.05 (d,  $J = 8.4$  Hz, 2H), 7.10 (t,  $J = 8.0$  Hz, 1H), 7.20 (d,  $J = 8.4$  Hz, 2H), 7.40 (d,  $J = 8.3$  Hz, 2H), 8.11 (s, 1H) ppm.  **$^{13}\text{C}$  NMR** (75 MHz,  $\text{CDCl}_3$ )  $\delta$  52.6, 56.4, 63.8, 65.7, 71.8, 109.8, 121.5, 122.0, 122.3, 125.0, 127.4, 128.1, 128.5, 130.5, 131.2, 131.6, 135.2, 137.3, 140.8, 172.8, 179.1 ppm. **HRMS** (ESI,  $m/z$ ): Calcd for  $\text{C}_{25}\text{H}_{21}\text{Br}_2\text{N}_2\text{O}_3$   $[\text{M}+\text{H}]^+$ : 554.9913, found: 554.9914. **HPLC:** The product was

analyzed by HPLC to determine the enantiomeric excess: 88% ee (Chiralpak AD-H, hexane/*i*-propanol = 90 : 10, flow rate 1.0 mL/min,  $\lambda$  = 254 nm,  $t_r$  = 26.09 and 32.46 min.).

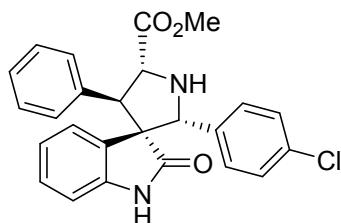

**(2'R, 3S, 4'R, 5'R)-Methyl 2'-(4-chlorophenyl)-2-oxo-4'-phenylspiro[indoline-3,3'-pyrrolidine]-5'-carboxylate (3mk).**

White solid; (34.0 mg, 79% yield),  $R_f$  = 0.30. (petroleum ether/ ethyl acetate 2/1).

**MP:** 177.7-178.5 °C.  $[\alpha]_D^{25}$  = +180 ( $c$  0.10, CH<sub>2</sub>Cl<sub>2</sub>).

**<sup>1</sup>H NMR** (300 MHz, CDCl<sub>3</sub>)  $\delta$  3.66 (br s, 1H), 3.83 (s, 3H), 4.16 (d,  $J$  = 5.0 Hz, 1H), 4.60 (d,  $J$  = 4.1 Hz, 1H), 4.71 (s, 1H), 6.10 (d,  $J$  = 7.5 Hz, 1H), 6.60 (d,  $J$  = 7.7 Hz, 1H), 6.71 (t,  $J$  = 7.5 Hz, 1H), 6.90 (d,  $J$  = 8.4 Hz, 2H), 7.00-7.11 (m, 3H), 7.21 (d,  $J$  = 7.4 Hz, 2H), 7.28-7.35 (m, 3H), 8.10 (s, 1H) ppm. **<sup>13</sup>C NMR** (75 MHz, CDCl<sub>3</sub>)  $\delta$  52.6, 57.0, 64.0, 66.0, 71.8, 109.5, 122.0, 125.1, 127.4, 127.6, 127.8, 128.2, 128.6, 128.9, 133.7, 134.5, 138.7, 140.9, 173.2, 179.5 ppm. **HRMS** (ESI,  $m/z$ ): Calcd for C<sub>25</sub>H<sub>22</sub>ClN<sub>2</sub>O<sub>3</sub> [M+H]<sup>+</sup>: 433.1313, found: 433.1311. **HPLC:** The product was analyzed by HPLC to determine the enantiomeric excess: 89% ee (Chiralpak AD-H, hexane/*i*-propanol = 90 : 10, flow rate 1.0 mL/min,  $\lambda$  = 254 nm,  $t_r$  = 25.75 and 34.96 min.).

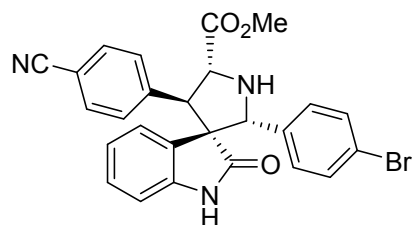

**(2'R, 3S, 4'R, 5'R)-Methyl 2'-(4-bromophenyl)-4'-(4-cyanophenyl)-2-oxospiro[indoline-3,3'-pyrrolidine]-5'-carboxylate (3nj).**

White solid; (34.0 mg, 68% yield),  $R_f$  = 0.20. (petroleum ether/ ethyl acetate 2/1).



**MP:** 86.7-87.4 °C.  $[\alpha]_D^{25} = +166$  (*c* 0.17, CH<sub>2</sub>Cl<sub>2</sub>).

**<sup>1</sup>H NMR** (300 MHz, CDCl<sub>3</sub>) δ 3.55 (br s, 1H), 3.80 (s, 3H), 4.17 (d, *J* = 5.9 Hz, 1H), 4.55 (s, 1H), 4.63 (s, 1H), 6.27 (d, *J* = 7.5 Hz, 1H), 6.62 (d, *J* = 7.7 Hz, 1H), 6.80 (dd, *J* = 15.4, 7.9 Hz, 3H), 7.11 (t, *J* = 7.7 Hz, 1H), 7.20 (d, *J* = 8.1 Hz, 2H), 7.29 (s, 2H), 7.55 (d, *J* = 8.0 Hz, 2H), 8.19 (s, 1H) ppm. **<sup>13</sup>C NMR** (75 MHz, CDCl<sub>3</sub>) δ 52.7, 56.9, 63.8, 65.2, 71.8, 110.0, 111.5, 118.5, 122.1, 122.4, 124.7, 127.2, 128.1, 128.8, 129.5, 131.2, 132.3, 135.0, 140.8, 143.6, 172.4, 178.9 ppm. **HRMS** (ESI, *m/z*): Calcd for C<sub>26</sub>H<sub>21</sub>BrN<sub>3</sub>O<sub>3</sub> [M+H]<sup>+</sup>: 502.0761, found: 502.0760. **HPLC:** The product was analyzed by HPLC to determine the enantiomeric excess: 83% ee (Chiralpak AD-H, hexane/*i*-propanol = 90 : 10, flow rate 1.0 mL/min, λ = 254 nm, tr = 67.76 and 72.41 min.).

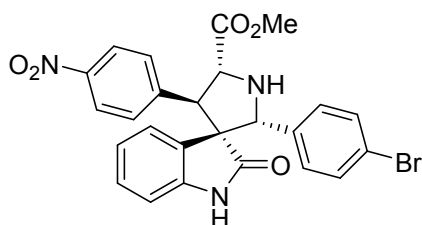

**(2'R, 3S, 4'R, 5'R)-Methyl 2'-(4-bromophenyl)-4'-(4-nitrophenyl)-2-oxospiro[indoline-3,3'-pyrrolidine]-5'-carboxylate (3oj).**

White solid; (48.0 mg, 92% yield), *R<sub>f</sub>* = 0.20. (petroleum ether/ ethyl acetate 2/1).

**MP:** 88.6-89.4 °C.  $[\alpha]_D^{25} = +144$  (*c* 0.20, CH<sub>2</sub>Cl<sub>2</sub>).

**<sup>1</sup>H NMR** (300 MHz, CDCl<sub>3</sub>) δ 3.50 (br s, 1H), 3.80 (s, 3H), 4.23 (d, *J* = 6.4 Hz, 1H), 4.59 (d, *J* = 6.2 Hz, 1H), 4.66 (s, 1H), 6.35 (d, *J* = 7.5 Hz, 1H), 6.63 (d, *J* = 7.7 Hz, 1H), 6.86-6.77 (m, 3H), 7.11 (t, *J* = 7.7 Hz, 1H), 7.21 (d, *J* = 8.2 Hz, 2H), 7.34 (d, *J* = 8.5 Hz, 2H), 8.11 (d, *J* = 8.5 Hz, 2H), 8.15 (s, 1H) ppm. **<sup>13</sup>C NMR** (75 MHz, CDCl<sub>3</sub>) δ 52.8, 56.7, 65.3, 69.2, 72.0, 110.0, 122.1, 122.5, 123.7, 124.7, 127.2, 128.1, 128.9, 129.6, 131.2, 135.0, 140.8, 145.5, 147.2, 172.3, 178.7 ppm. **HRMS** (ESI, *m/z*): Calcd for C<sub>25</sub>H<sub>21</sub>BrN<sub>3</sub>O<sub>5</sub> [M+H]<sup>+</sup>: 552.0659, found: 522.0658. **HPLC:** The product was analyzed by HPLC to determine the enantiomeric excess: 88% ee (Chiralpak AD-H, hexane/*i*-propanol = 80 : 20, flow rate 1.0 mL/min, λ = 254 nm, tr = 21.03 and 27.59 min.).

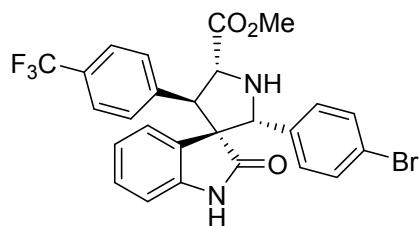

**(2'R, 3S, 4'R, 5'R)-Methyl 2'-(4-bromophenyl)-2-oxo-4'-(4-(trifluoromethyl)phenyl)spiro[indoline-3,3'-pyrrolidine]-5'-carboxylate (3pj).**

White solid; (46.0 mg, 85% yield),  $R_f = 0.30$ . (petroleum ether/ ethyl acetate 2/1).

**MP:** 88.0-89.0 °C.  $[\alpha]_D^{25} = +119$  ( $c$  0.27,  $\text{CH}_2\text{Cl}_2$ ).

**$^1\text{H NMR}$**  (300 MHz,  $\text{CDCl}_3$ )  $\delta$  3.82 (s, 3H), 4.21 (d,  $J = 5.8$  Hz, 1H), 4.58 (d,  $J = 5.8$  Hz, 1H), 4.66 (s, 1H), 6.21 (d,  $J = 7.5$  Hz, 1H), 6.62 (d,  $J = 7.7$  Hz, 1H), 6.76 (t,  $J = 7.6$  Hz, 1H), 6.85 (d,  $J = 8.3$  Hz, 2H), 7.09 (t,  $J = 7.6$  Hz, 1H), 7.23 (d,  $J = 8.3$  Hz, 2H), 7.31 (d,  $J = 8.0$  Hz, 2H), 7.54 (d,  $J = 8.0$  Hz, 2H), 7.77 (s, 1H) ppm.  **$^{13}\text{C NMR}$**  (75 MHz,  $\text{CDCl}_3$ )  $\delta$  52.7, 56.7, 63.8, 65.6, 72.0, 109.7, 122.1, 122.3, 124.8, 125.5 (d,  $J_{\text{C-F}} = 3.7$  Hz), 127.2, 128.1, 128.6, 129.2, 131.2, 135.0, 140.7, 142.4, 172.6, 178.8 ppm. **HRMS** (ESI,  $m/z$ ): Calcd for  $\text{C}_{26}\text{H}_{21}\text{BrF}_3\text{N}_2\text{O}_3$   $[\text{M}+\text{H}]^+$ : 545.0682, found: 545.0684. **HPLC:** The product was analyzed by HPLC to determine the enantiomeric excess: 81% ee (Chiralpak AD-H, hexane/*i*-propanol = 90 : 10, flow rate 1.0 mL/min,  $\lambda = 254$  nm,  $t_r = 19.00$  and 22.67 min.).

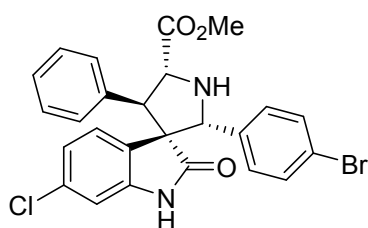

**(2'R, 3S, 4'R, 5'R)-Methyl 2'-(4-bromophenyl)-6-chloro-2-oxo-4'-phenylspiro[indoline-3,3'-pyrrolidine]-5'-carboxylate (3kj).**

White solid; (50.0 mg, 98% yield),  $R_f = 0.32$ . (petroleum ether/ ethyl acetate 2/1).

**MP:** 118.0-119.0 °C.  $[\alpha]_D^{25} = +86$  ( $c$  0.20,  $\text{CH}_2\text{Cl}_2$ ).

**$^1\text{H NMR}$**  (300 MHz,  $\text{CDCl}_3$ )  $\delta$  3.63 (br s, 1H), 3.82 (s, 3H), 4.13 (d,  $J = 4.7$  Hz, 1H), 4.55 (d,  $J = 3.5$  Hz, 1H), 4.64 (s, 1H), 5.90 (d,  $J = 8.2$  Hz, 1H), 6.61 (d,  $J = 1.4$  Hz,

1H), 6.62-6.70 (m, 1H), 6.84 (d,  $J = 8.4$  Hz, 2H), 7.06-7.24 (m, 4H), 7.32 (d,  $J = 6.4$  Hz, 3H), 8.10 (s, 1H) ppm.  $^{13}\text{C}$  NMR (75 MHz,  $\text{CDCl}_3$ )  $\delta$  52.6, 56.9, 63.6, 66.0, 71.8, 110.1, 122.0, 122.2, 125.6, 126.0, 127.8, 128.1, 128.7, 128.8, 131.3, 134.0, 134.5, 138.7, 142.0, 173.0, 179.4 ppm. **HRMS** (ESI,  $m/z$ ): Calcd for  $\text{C}_{25}\text{H}_{21}\text{BrClN}_2\text{O}_3$   $[\text{M}+\text{H}]^+$ : 511.0419, found: 511.0417. **HPLC**: The product was analyzed by HPLC to determine the enantiomeric excess: 86% ee (Chiralpak AD-H, hexane/*i*-propanol = 90 : 10, flow rate 1.0 mL/min,  $\lambda = 254$  nm,  $t_r = 25.72$  and 41.60 min.).

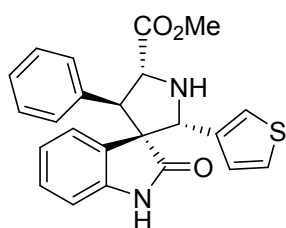

**(2'S, 3S, 4'R, 5'R)-Methyl 2-oxo-4'-phenyl-2'-(thiophen-3-yl)spiro[indoline-3,3'-pyrrolidine]-5'-carboxylate (3mi).**

White solid; (40.0 mg, 99% yield),  $R_f = 0.32$ . (petroleum ether/ ethyl acetate 2/1).

**MP**: 162.0-163.0 °C.  $[\alpha]_D^{25} = +99$  ( $c$  0.10,  $\text{CH}_2\text{Cl}_2$ ).

$^1\text{H}$  NMR (300 MHz,  $\text{CDCl}_3$ )  $\delta$  3.81 (s, 3H), 4.14 (d,  $J = 5.0$  Hz, 1H), 4.58 (d,  $J = 4.8$  Hz, 1H), 4.80 (s, 1H), 6.03 (d,  $J = 7.5$  Hz, 1H), 6.51 (d,  $J = 5.0$  Hz, 1H), 6.66 (t,  $J = 7.8$  Hz, 2H), 6.91 (s, 1H), 6.96-7.10 (m, 2H), 7.17-7.23 (m, 2H), 7.29 (d,  $J = 7.2$  Hz, 3H), 8.16 (s, 1H) ppm.  $^{13}\text{C}$  NMR (75 MHz,  $\text{CDCl}_3$ )  $\delta$  52.5, 57.4, 63.5, 66.3, 68.7, 109.4, 121.4, 121.9, 125.0, 125.3, 125.6, 127.5, 127.5, 128.1, 128.6, 128.9, 136.9, 139.1, 141.3, 173.0, 180.1 ppm. **HRMS** (ESI,  $m/z$ ): Calcd for  $\text{C}_{23}\text{H}_{21}\text{N}_2\text{O}_3\text{S}$   $[\text{M}+\text{H}]^+$ : 405.1267, found: 405.1268. **HPLC**: The product was analyzed by HPLC to determine the enantiomeric excess: 84% ee (Chiralpak AD-H, hexane/*i*-propanol = 90 : 10, flow rate 1.0 mL/min,  $\lambda = 254$  nm,  $t_r = 22.51$  and 31.45 min.).

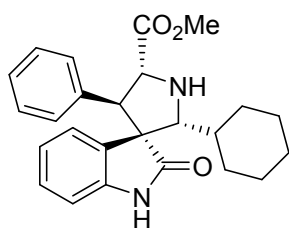

**(2'R, 3S, 4'R, 5'R)-Methyl 2'-cyclohexyl-2-oxo-4'-phenylspiro[indoline- 3,3'-pyrrolidine]-5'-carboxylate (3mk).**

White solid; (20.0 mg, 50% yield),  $R_f = 0.32$ . (petroleum ether/ ethyl acetate 2/1).

**MP:** 92.1-93.0 °C.  $[\alpha]_D^{25} = -14$  ( $c$  0.12,  $\text{CH}_2\text{Cl}_2$ ).

**$^1\text{H}$  NMR** (300 MHz,  $\text{CDCl}_3$ )  $\delta$  0.34-0.52 (m, 1H), 0.81-1.11 (m, 5H), 1.51 (s, 1H), 1.76 (dd,  $J = 38.0, 11.0$  Hz, 3H), 2.13 (d,  $J = 12.4$  Hz, 1H), 2.94 (br s, 1H), 3.41 (d,  $J = 9.3$  Hz, 1H), 3.71 (s, 3H), 3.94 (d,  $J = 7.2$  Hz, 1H), 4.39 (d,  $J = 7.3$  Hz, 1H), 6.33 (d,  $J = 7.5$  Hz, 1H), 6.73-6.64 (m, 2H), 7.01 (dd,  $J = 16.5, 7.7$  Hz, 3H), 7.14 (d,  $J = 6.3$  Hz, 3H), 8.47 (s, 1H) ppm.  **$^{13}\text{C}$  NMR** (75 MHz,  $\text{CDCl}_3$ )  $\delta$  25.7, 25.9, 26.1, 30.1, 31.9, 39.6, 52.4, 61.2, 62.0, 64.9, 73.8, 109.3, 121.7, 125.1, 127.2, 127.6, 128.1, 128.6, 130.4, 137.8, 140.1, 172.6, 181.3 ppm. **HRMS** (ESI,  $m/z$ ): Calcd for  $\text{C}_{25}\text{H}_{29}\text{N}_2\text{O}_3$   $[\text{M}+\text{H}]^+$ : 405.2173, found: 405.2172. **HPLC:** The product was analyzed by HPLC to determine the enantiomeric excess: 90% ee (Chiralpak AD-H, hexane/*i*-propanol = 90 : 10, flow rate 1.0 mL/min,  $\lambda = 254$  nm,  $t_r = 22.97$  and 66.69 min.).

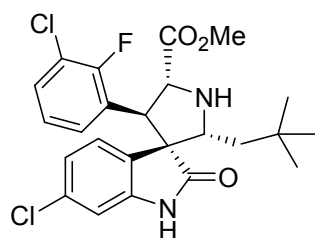

**(2'R, 3S, 4'S, 5'R)-Methyl 6-chloro-4'-(3-chloro-2-fluorophenyl)-2'-neopentyl-2-oxospiro[indoline-3,3'-pyrrolidine]-5'-carboxylate (3ql).**

White solid; (22.0 mg, 46% yield),  $R_f = 0.30$ . (petroleum ether/ ethyl acetate 2/1).

**MP:** 167.5-168.5 °C.  $[\alpha]_D^{25} = -15$  ( $c$  0.10,  $\text{CH}_2\text{Cl}_2$ ).

**$^1\text{H}$  NMR** (300 MHz,  $\text{CDCl}_3$ )  $\delta$  0.82 (s, 9H), 1.41 (dd,  $J = 14.1, 9.9$  Hz, 2H), 2.99 (br s, 1H), 3.40 (d,  $J = 8.9$  Hz, 1H), 3.77 (s, 3H), 4.15 (d,  $J = 6.5$  Hz, 1H), 4.44 (d,  $J = 6.3$  Hz, 1H), 6.00 (d,  $J = 8.1$  Hz, 1H), 6.66 (dd,  $J = 8.1, 1.6$  Hz, 1H), 6.87 (d,  $J = 1.5$  Hz, 1H), 7.13 (t,  $J = 8.0$  Hz, 1H), 7.24-7.33 (m, 1H), 7.39 (t,  $J = 6.8$  Hz, 1H), 8.25 (s, 1H) ppm.  **$^{13}\text{C}$  NMR** (75 MHz,  $\text{CDCl}_3$ )  $\delta$  29.8, 30.2, 43.2, 50.8, 52.6, 62.8, 65.4, 67.1, 110.3, 122.0, 123.8, 124.5, 124.5, 124.8, 125.7, 126.8, 126.8, 129.8, 134.0, 142.4,

172.1, 180.5 ppm. **HRMS** (ESI, m/z): Calcd for  $C_{24}H_{26}Cl_2FN_2O_3$   $[M+H]^+$ : 479.1299, found: 479.1297. **HPLC**: The product was analyzed by HPLC to determine the enantiomeric excess: 94% ee (Chiralpak AD-H, hexane/*i*-propanol = 90 : 10, flow rate 1.0 mL/min,  $\lambda$  = 254 nm,  $t_r$  = 22.21 and 32.85 min.).

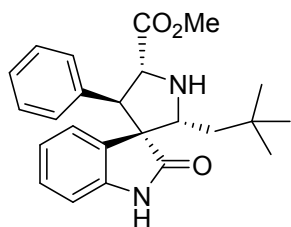

**(2'R, 3S, 4'R, 5'R)-Methyl 2'-neopentyl-2-oxo-4'-phenylspiro[indoline-3,3'-pyrrolidine]-5'-carboxylate (3ml).**

Yellow solid; (18.0 mg, 46% yield),  $R_f$  = 0.30. (petroleum ether/ ethyl acetate 2/1).

**MP**: 59.1-60.0 °C.  $[\alpha]_D^{25} = +43$  ( $c$  0.13,  $CH_2Cl_2$ ).

**$^1H$  NMR** (300 MHz,  $CDCl_3$ )  $\delta$  0.82 (s, 9H), 1.20-1.45 (m, 2H), 3.00 (br s, 1H), 3.58 (d,  $J$  = 9.4 Hz, 1H), 3.78 (s, 3H), 3.96 (d,  $J$  = 4.8 Hz, 1H), 4.47 (d,  $J$  = 4.6 Hz, 1H), 5.86 (d,  $J$  = 7.6 Hz, 1H), 6.61 (t,  $J$  = 7.6 Hz, 1H), 6.82 (d,  $J$  = 7.7 Hz, 1H), 7.05 (t,  $J$  = 7.6 Hz, 1H), 7.15 (d,  $J$  = 6.7 Hz, 2H), 7.20-7.32 (m, 3H), 8.74 (s, 1H) ppm.  **$^{13}C$  NMR** (75 MHz,  $CDCl_3$ )  $\delta$  29.8, 30.2, 43.6, 52.4, 57.0, 63.4, 66.2, 67.2, 109.3, 121.8, 125.0, 127.3, 127.5, 127.8, 128.4, 128.9, 139.6, 141.2, 173.1, 181.3 ppm. **HRMS** (ESI, m/z): Calcd for  $C_{24}H_{29}N_2O_3$   $[M+H]^+$ : 393.2173, found: 393.2172. **HPLC**: The product was analyzed by HPLC to determine the enantiomeric excess: 84% ee (Chiralpak AD-H, hexane/*i*-propanol = 90 : 10, flow rate 1.0 mL/min,  $\lambda$  = 254 nm,  $t_r$  = 7.68 and 22.61 min.).

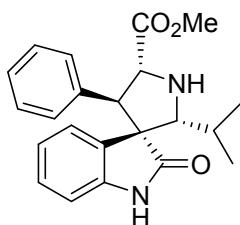

**(2'R, 3S, 4'R, 5'R)-Methyl 2'-isopropyl-2-oxo-4'-phenylspiro[indoline-3,3'-pyrrolidine]-5'-carboxylate (3mm).**

Yellow solid; (17.0 mg, 47% yield),  $R_f = 0.30$ . (petroleum ether/ ethyl acetate 2/1).

**MP:** 46.4-47.3 °C.  $[\alpha]_D^{25} = -10$  ( $c$  0.15,  $\text{CH}_2\text{Cl}_2$ ).

**$^1\text{H}$  NMR** (300 MHz,  $\text{CDCl}_3$ )  $\delta$  0.38 (d,  $J = 6.6$  Hz, 3H), 1.09 (d,  $J = 6.6$  Hz, 3H), 2.06 (dd,  $J = 14.4, 7.8$  Hz, 1H), 3.33 (d,  $J = 9.3$  Hz, 1H), 3.72 (s, 3H), 3.97 (d,  $J = 7.1$  Hz, 1H), 4.41 (d,  $J = 7.1$  Hz, 1H), 6.31 (d,  $J = 7.5$  Hz, 1H), 6.61-6.78 (m, 2H), 7.00 (d,  $J = 7.5$  Hz, 1H), 7.03-7.09 (m, 2H), 7.15 (t,  $J = 5.9$  Hz, 3H), 8.58 (s, 1H) ppm.  **$^{13}\text{C}$  NMR** (75 MHz,  $\text{CDCl}_3$ )  $\delta$  20.1, 22.0, 30.3, 52.4, 61.1, 62.1, 65.0, 75.3, 109.3, 121.8, 125.2, 127.2, 127.6, 128.1, 128.6, 130.3, 137.9, 140.3, 172.6, 181.3 ppm. **HRMS** (ESI,  $m/z$ ): Calcd for  $\text{C}_{22}\text{H}_{25}\text{N}_2\text{O}_3$   $[\text{M}+\text{H}]^+$ : 365.1860, found: 365.1859. **HPLC:** The product was analyzed by HPLC to determine the enantiomeric excess: 70% ee (Chiralpak AD-H, hexane/*i*-propanol = 90 : 10, flow rate 1.0 mL/min,  $\lambda = 254$  nm,  $t_r = 11.97$  and 13.45 min.).

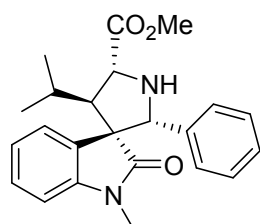

**(2'*R*, 3*S*, 4'*R*, 5'*R*)-Methyl 4'-isopropyl-1-methyl-2-oxo-2'-phenylspiro[indoline-3,3'-pyrrolidine]-5'-carboxylate (3ra).**

Colorless oil (17.0 mg, 45% yield),  $R_f = 0.42$ . (petroleum ether/ ethyl acetate 2/1).

$[\alpha]_D^{25} = +148$  ( $c$  0.10,  $\text{CH}_2\text{Cl}_2$ ).

**$^1\text{H}$  NMR** (300 MHz,  $\text{CDCl}_3$ )  $\delta$  0.42 (d,  $J = 6.4$  Hz, 3H), 0.98 (d,  $J = 6.7$  Hz, 3H), 1.90-2.05 (m, 1H), 2.76 (s, 3H), 2.83 (t,  $J = 9.5$  Hz, 1H), 3.86 (s, 3H), 3.91 (d,  $J = 9.1$  Hz, 1H), 4.42 (s, 1H), 6.69 (d,  $J = 7.7$  Hz, 1H), 6.73-6.81 (m, 2H), 7.05-7.18 (m, 4H), 7.31 (td,  $J = 7.7, 1.0$  Hz, 1H), 7.39 (d,  $J = 7.4$  Hz, 1H) ppm.  **$^{13}\text{C}$  NMR** (75 MHz,  $\text{CDCl}_3$ )  $\delta$  20.5, 22.1, 25.8, 28.6, 52.4, 60.2, 63.1, 66.4, 74.8, 108.0, 122.3, 124.4, 125.9, 127.7, 128.2, 129.8, 135.7, 144.1, 173.4, 178.3 ppm. The product was analyzed by HPLC to determine the enantiomeric excess: 75% ee (Chiralpak AD-H, hexane/*i*-propanol = 90 : 10, flow rate 1.0 mL/min,  $\lambda = 254$  nm);  $t_r = 11.30$  and 15.89 min.

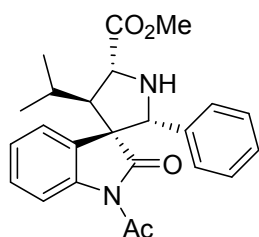

**(2'R, 3S, 4'R, 5'R)-Methyl 1-acetyl-4'-isopropyl-2-oxo-2'-phenylspiro[indoline-3,3'-pyrrolidine]-5'-carboxylate (3sa).**

White solid (24.0 mg, 59% yield),  $R_f = 0.55$ . (petroleum ether/ ethyl acetate 2/1).

**MP:** 43.4-44.2 °C.  $[\alpha]_D^{25} = -59$  ( $c$  0.20,  $\text{CH}_2\text{Cl}_2$ ).

**$^1\text{H NMR}$**  (300 MHz,  $\text{CDCl}_3$ )  $\delta$  0.41 (d,  $J = 6.6$  Hz, 3H), 0.95 (d,  $J = 6.6$  Hz, 3H), 2.10 (ddd,  $J = 17.3, 11.9, 5.4$  Hz, 1H), 2.30 (s, 3H), 3.02 (dd,  $J = 10.8, 6.7$  Hz, 1H), 3.84 (s, 3H), 4.15 (d,  $J = 6.6$  Hz, 1H), 4.72 (s, 1H), 6.71 (d,  $J = 7.4$  Hz, 2H), 7.06 (t,  $J = 7.4$  Hz, 2H), 7.15 (t,  $J = 7.1$  Hz, 1H), 7.28-7.34 (m, 2H), 7.52 (dd,  $J = 5.6, 3.0$  Hz, 1H), 7.95 (dd,  $J = 6.1, 2.9$  Hz, 1H) ppm.  **$^{13}\text{C NMR}$**  (75 MHz,  $\text{CDCl}_3$ )  $\delta$  22.1, 22.3, 26.1, 30.0, 52.6, 59.9, 64.1, 64.7, 74.5, 116.4, 121.7, 125.4, 125.6, 127.9, 128.5, 128.5, 129.4, 133.6, 139.7, 170.2, 175.5, 176.6 ppm. **HRMS** (ESI,  $m/z$ ): Calcd for  $\text{C}_{24}\text{H}_{27}\text{N}_2\text{O}_4$   $[\text{M}+\text{H}]^+$ : 407.1965, found: 407.1964. **HPLC:** The product was analyzed by HPLC to determine the enantiomeric excess: 76% ee (Chiralpak AD-H, hexane/*i*-propanol = 90 : 10, flow rate 1.0 mL/min,  $\lambda = 254$  nm);  $t_r = 7.24$  and 10.53 min.

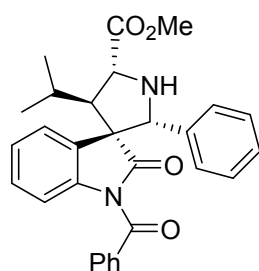

**(2'R, 3S, 4'R, 5'R)-Methyl 1-benzoyl-4'-isopropyl-2-oxo-2'-phenylspiro[indoline-3,3'-pyrrolidine]-5'-carboxylate (3ta).**

White solid (25.0 mg, 54% yield),  $R_f = 0.45$ . (petroleum ether/ ethyl acetate 2/1).

**MP:** 44.5-45.2 °C.  $[\alpha]_D^{25} = -100$  ( $c$  0.10,  $\text{CH}_2\text{Cl}_2$ ).

**$^1\text{H NMR}$**  (300 MHz,  $\text{CDCl}_3$ )  $\delta$  0.47 (d,  $J = 6.6$  Hz, 3H), 0.89 (d,  $J = 6.6$  Hz, 3H), 2.03 (ddd,  $J = 13.0, 9.1, 4.8$  Hz, 1H), 3.05 (dd,  $J = 10.8, 6.7$  Hz, 1H), 3.82 (s, 3H), 4.00 (d,

$J = 6.7$  Hz, 1H), 4.89 (s, 1H), 6.80 (d,  $J = 7.1$  Hz, 2H), 6.90-6.97 (m, 2H), 7.22 (d,  $J = 7.6$  Hz, 2H), 7.36-7.30 (m, 5H), 7.47-7.56 (m, 2H), 7.60 (dd,  $J = 5.9, 2.9$  Hz, 1H) ppm.  $^{13}\text{C}$  NMR (75 MHz,  $\text{CDCl}_3$ )  $\delta$  21.9, 22.3, 30.0, 52.5, 61.6, 64.0, 64.5, 73.2, 115.0, 122.3, 125.2, 125.9, 128.0, 128.2, 128.4, 128.5, 129.2, 130.3, 132.8, 133.9, 134.5, 140.1, 169.0, 175.4, 175.5 ppm. The product was analyzed by HPLC to determine the enantiomeric excess: 70% ee (Chiralpak AD-H, hexane/*i*-propanol = 90 : 10, flow rate 1.0 mL/min,  $\lambda = 254$  nm); tr = 14.65 and 28.80 min.

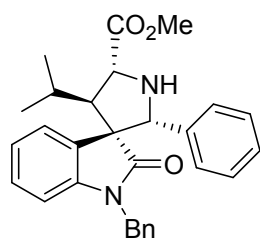

**(2'R, 3S, 4'R, 5'R)-Methyl 1-benzyl-4'-isopropyl-2'-oxo-2'-phenylspiro[indoline-3,3'-pyrrolidine]-5'-carboxylate (3ua).**

White solid (27.0 mg, 60% yield),  $R_f = 0.45$ . (petroleum ether/ ethyl acetate 2/1).

**MP:** 47.2-48.0 °C.  $[\alpha]_D^{25} = -88$  ( $c$  0.10,  $\text{CH}_2\text{Cl}_2$ ).

$^1\text{H}$  NMR (300 MHz,  $\text{CDCl}_3$ )  $\delta$  0.37 (d,  $J = 6.4$  Hz, 3H), 0.92 (d,  $J = 6.5$  Hz, 3H), 2.02-2.19 (m, 1H), 3.00-3.11 (m, 1H), 3.83 (s, 3H), 4.18 (d,  $J = 6.8$  Hz, 1H), 4.34 (d,  $J = 15.9$  Hz, 1H), 4.73-4.91 (m, 2H), 6.37 (d,  $J = 6.7$  Hz, 1H), 6.49 (d,  $J = 7.0$  Hz, 2H), 6.84 (d,  $J = 7.4$  Hz, 2H), 7.03-7.15 (m, 7H), 7.20 (d,  $J = 7.3$  Hz, 1H), 7.50 (d,  $J = 6.2$  Hz, 1H) ppm.  $^{13}\text{C}$  NMR (75 MHz,  $\text{CDCl}_3$ )  $\delta$  21.7, 22.4, 30.2, 43.3, 52.4, 60.4, 64.1, 64.4, 72.9, 109.3, 122.1, 122.6, 126.4, 126.6, 127.1, 127.9, 127.9, 128.0, 128.5, 130.1, 134.5, 135.2, 142.7, 175.7 ppm. **HRMS** (ESI,  $m/z$ ): Calcd for  $\text{C}_{29}\text{H}_{31}\text{N}_2\text{O}_3$   $[\text{M}+\text{H}]^+$ : 455.2329, found: 455.2326. **HPLC:** The product was analyzed by HPLC to determine the enantiomeric excess: 94% ee (Chiralpak AD-H, hexane/*i*-propanol = 90 : 10, flow rate 1.0 mL/min,  $\lambda = 254$  nm); tr = 24.59 and 28.02 min.



## **7. Copies of NMR spectra**

**<sup>31</sup>P NMR of Kephos**

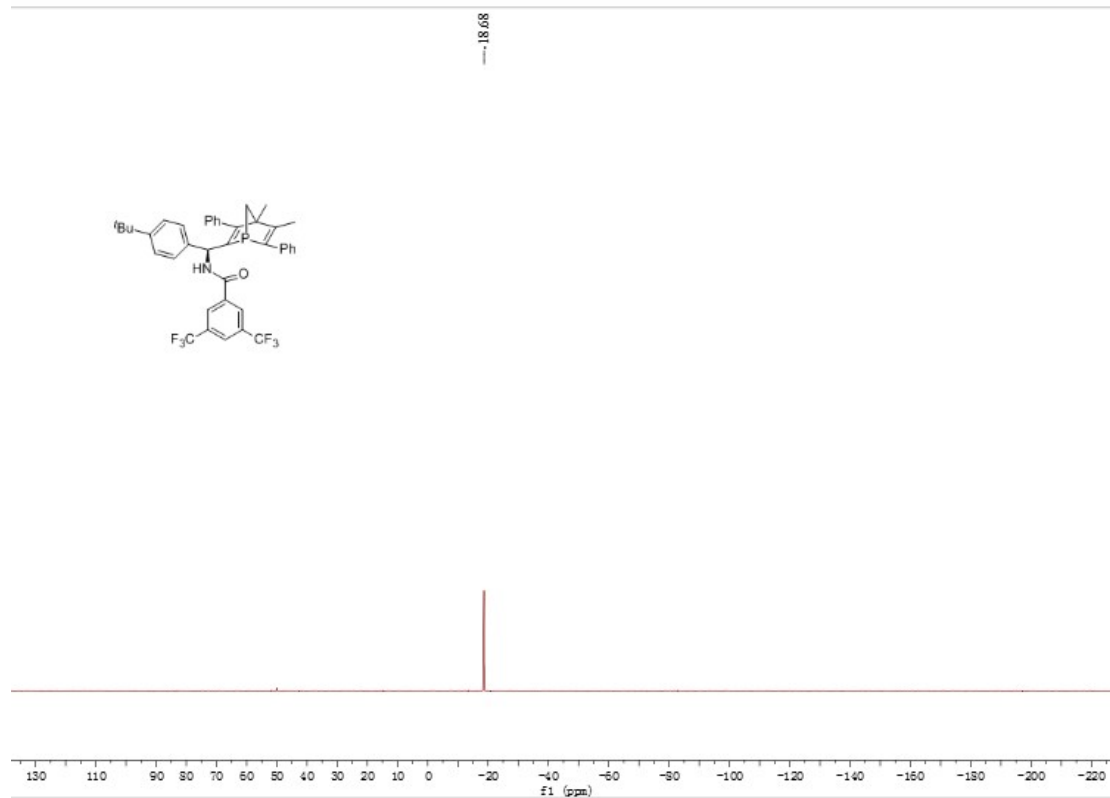

**$^1\text{H}$  NMR of Kephos**

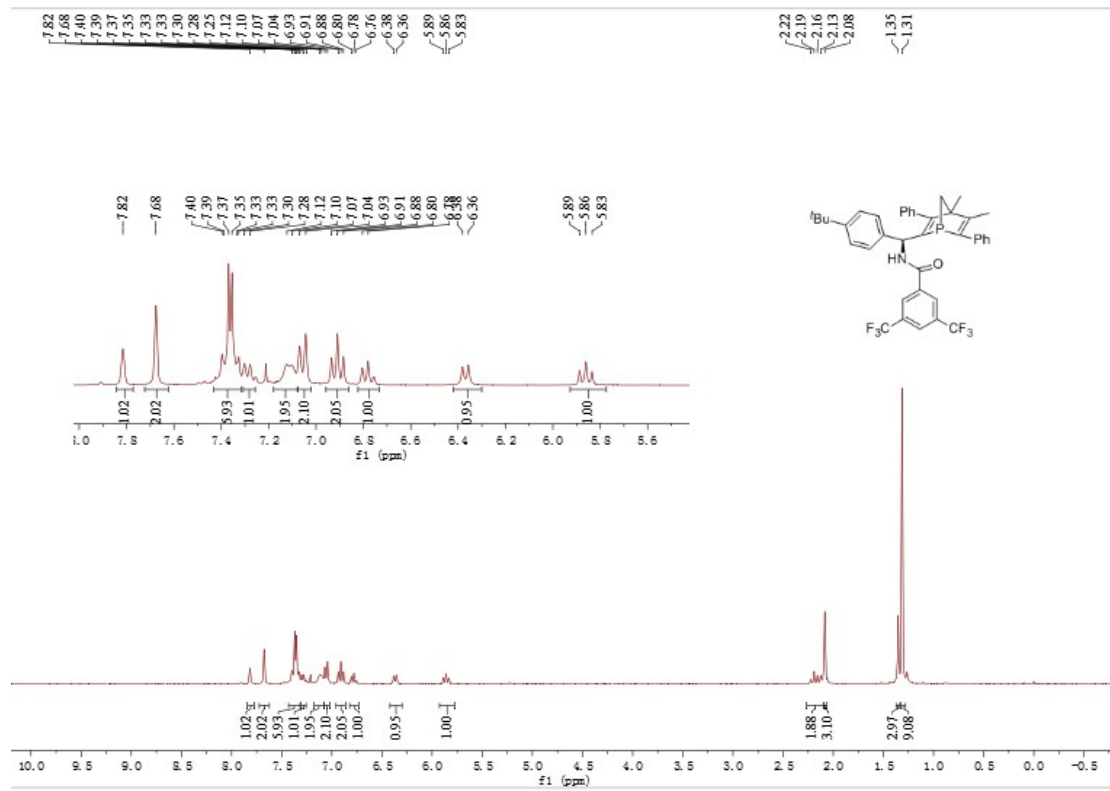

### <sup>13</sup>C NMR of Kephos

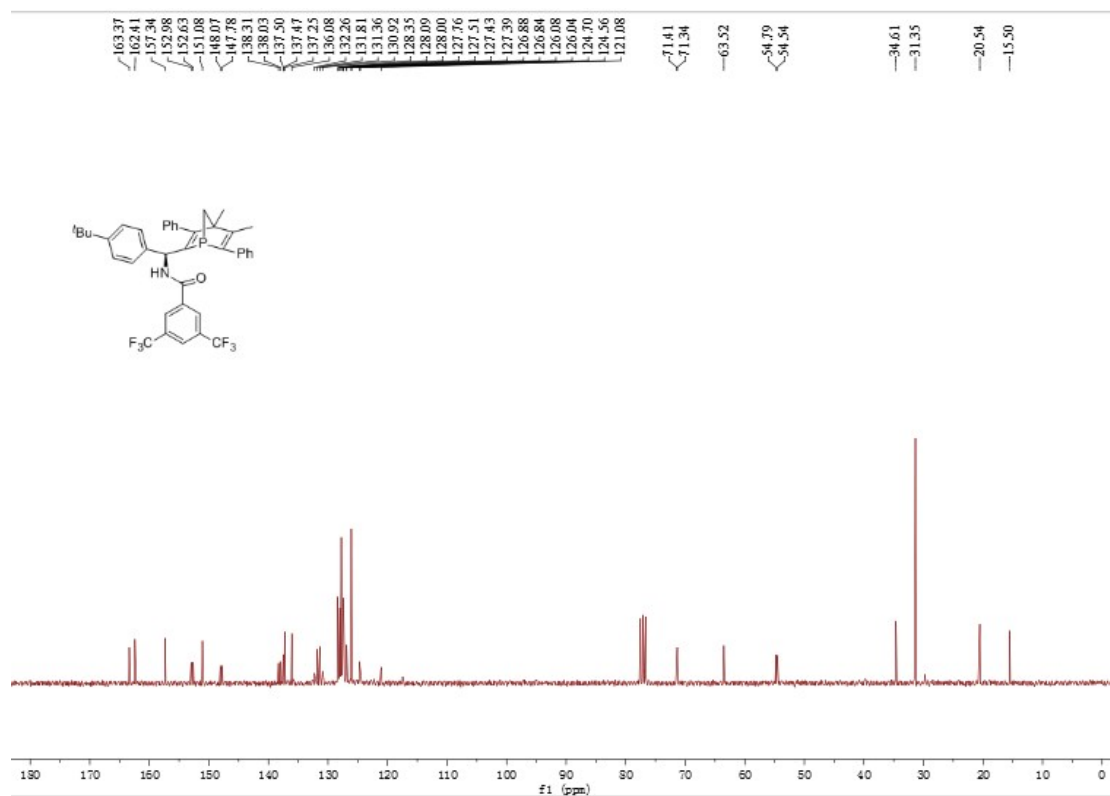

### <sup>1</sup>H NMR of 3aa

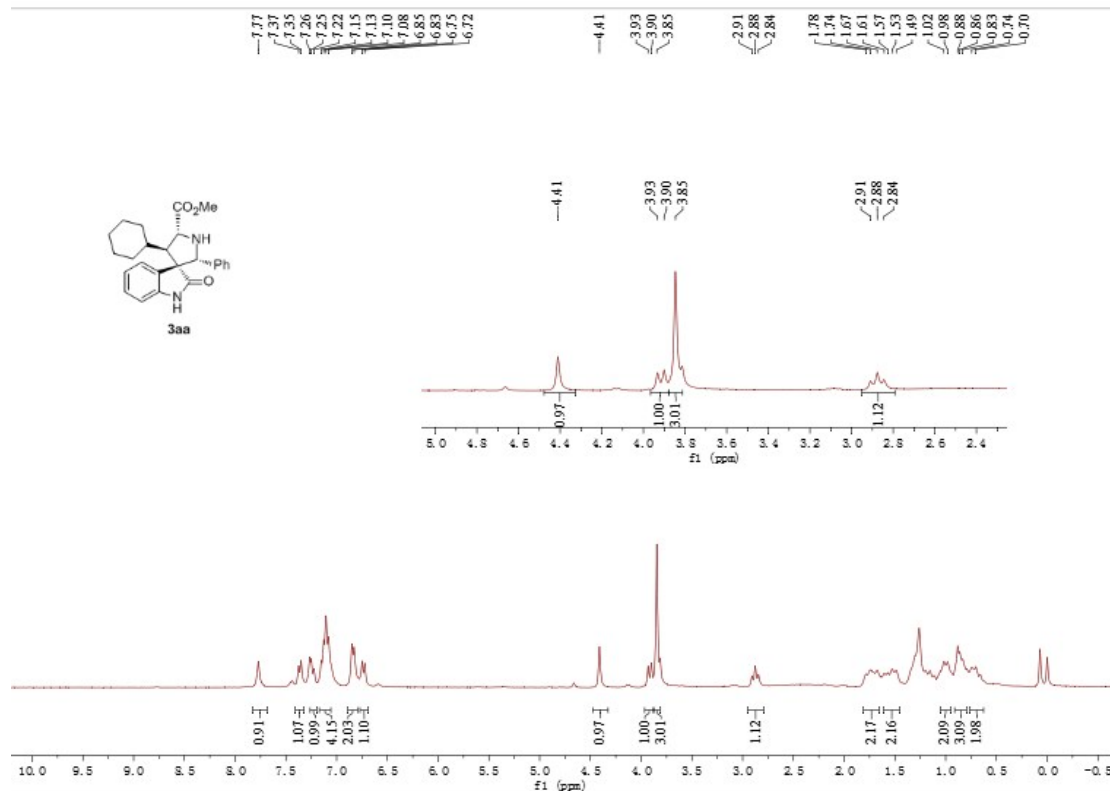

### <sup>13</sup>C NMR of 3aa

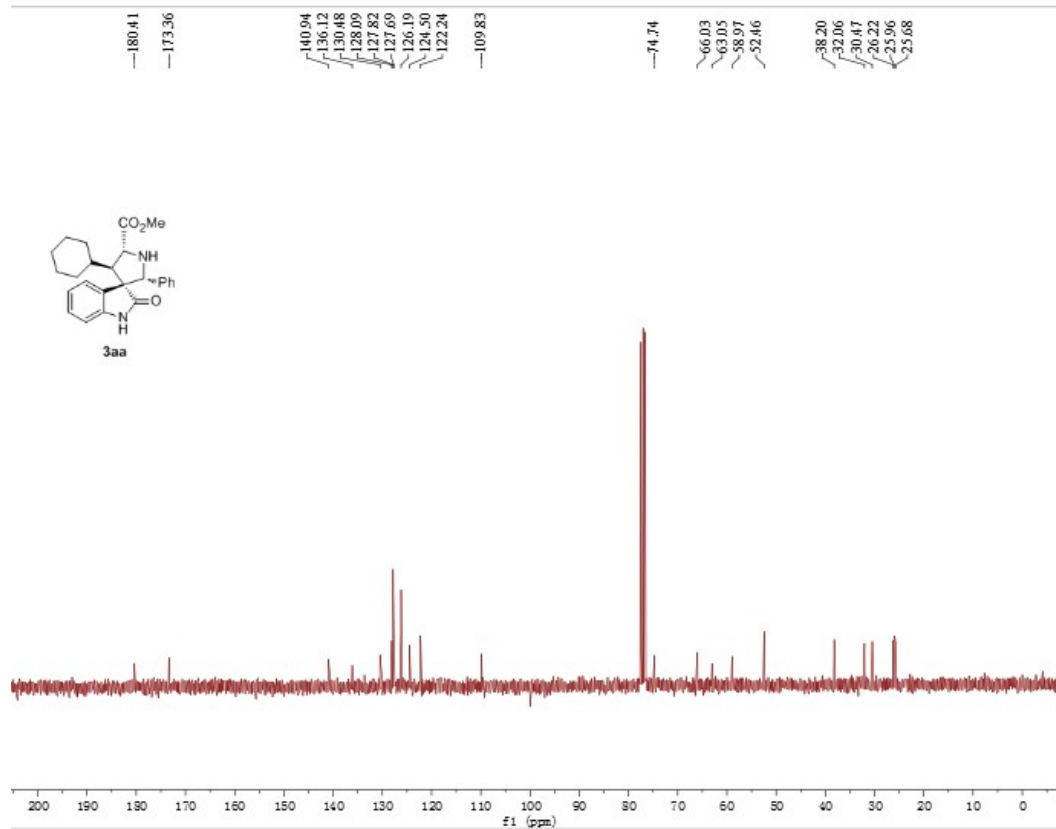

### <sup>1</sup>H NMR of 3ba

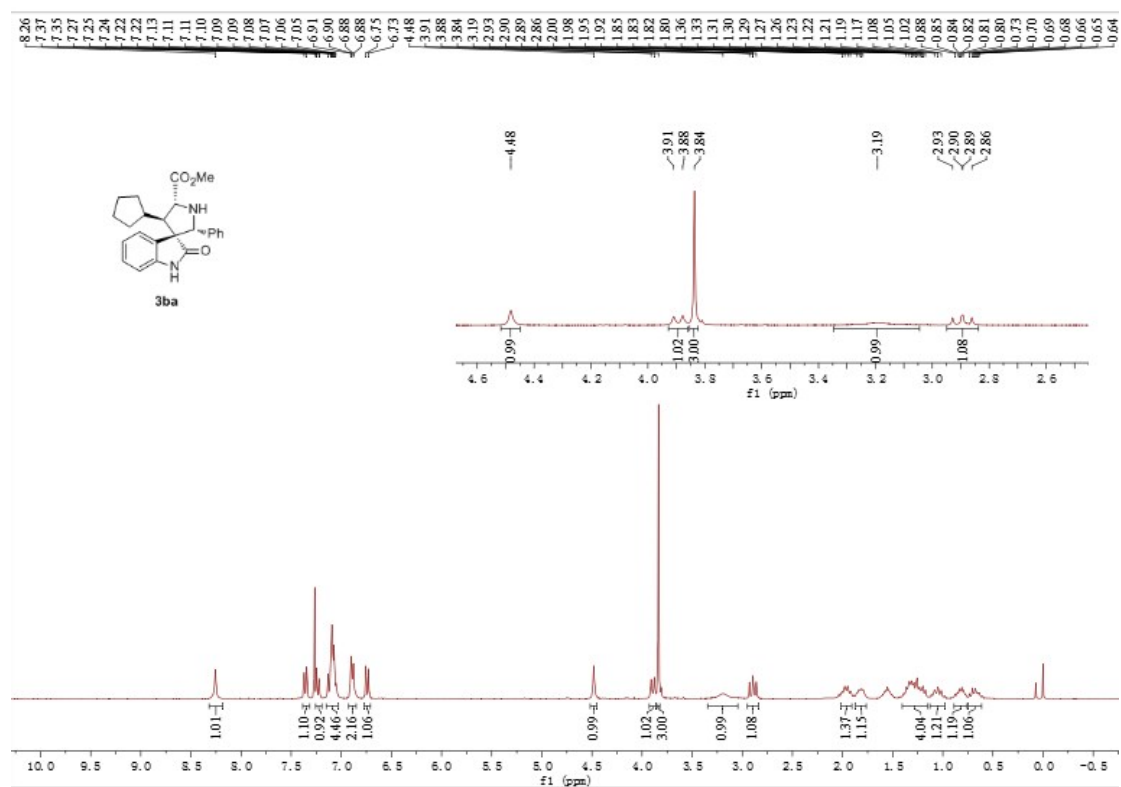

### <sup>13</sup>C NMR of 3ba

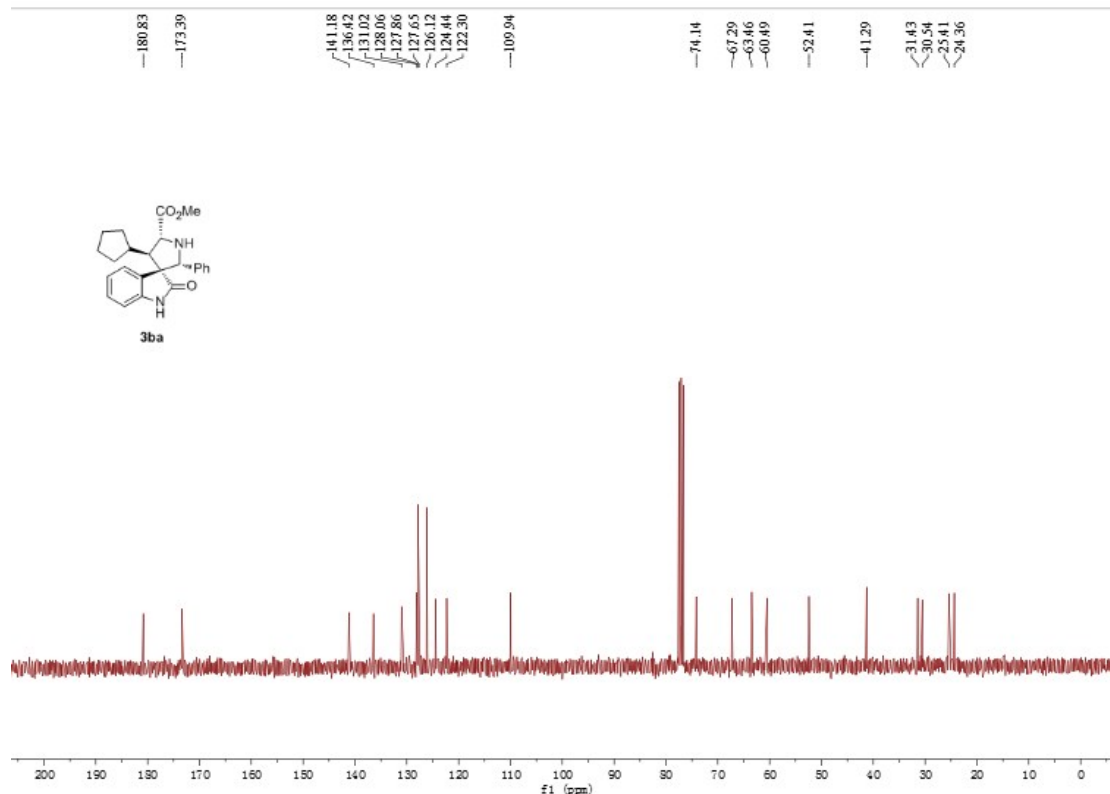

### <sup>1</sup>H NMR of 3ca

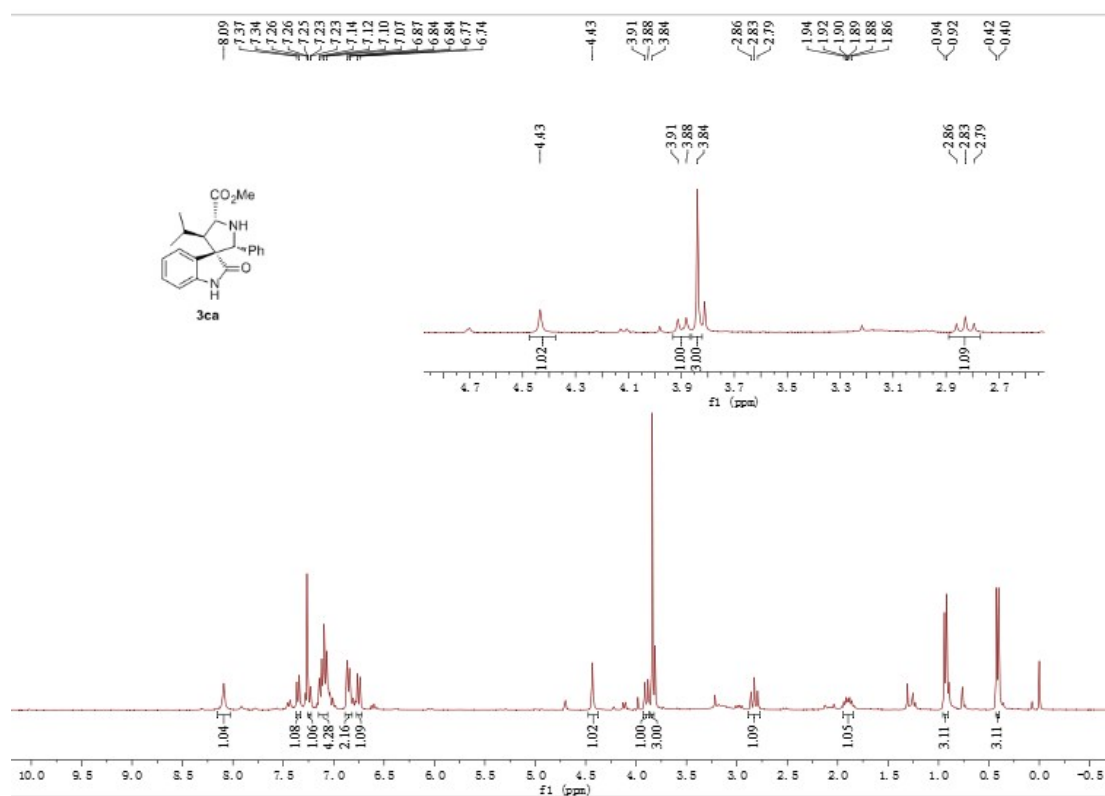

### <sup>13</sup>C NMR of 3ca

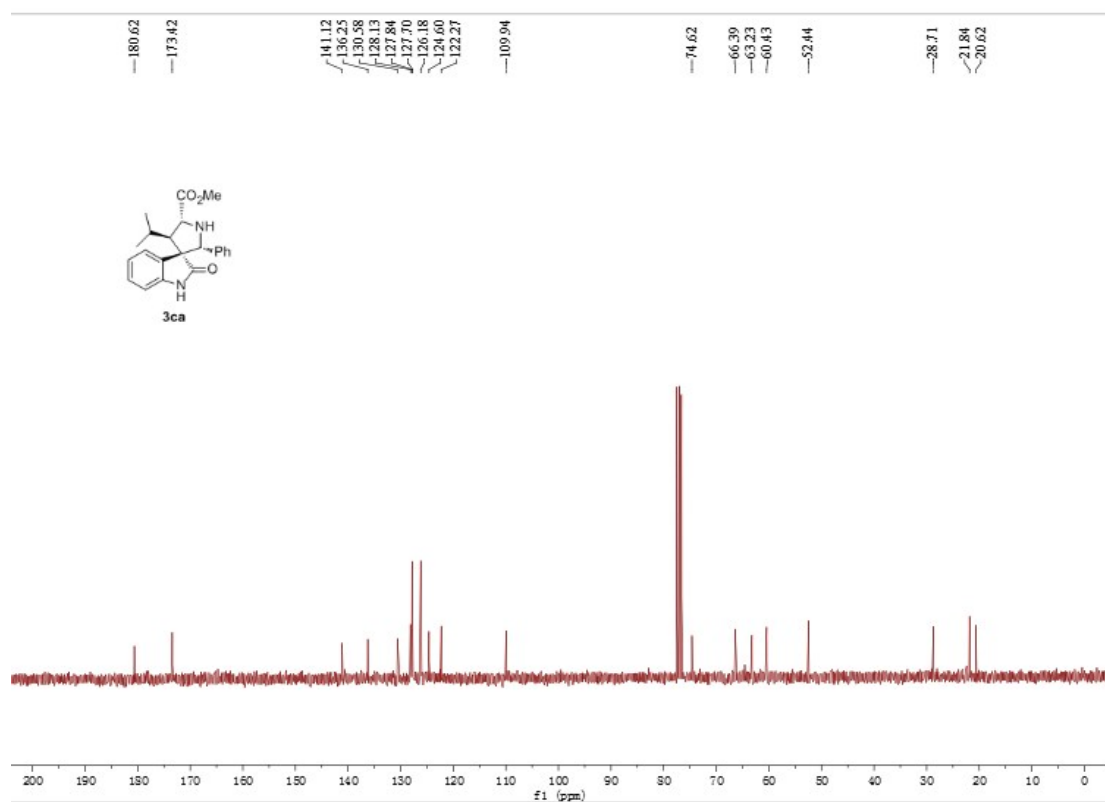

### <sup>1</sup>H NMR of 3da

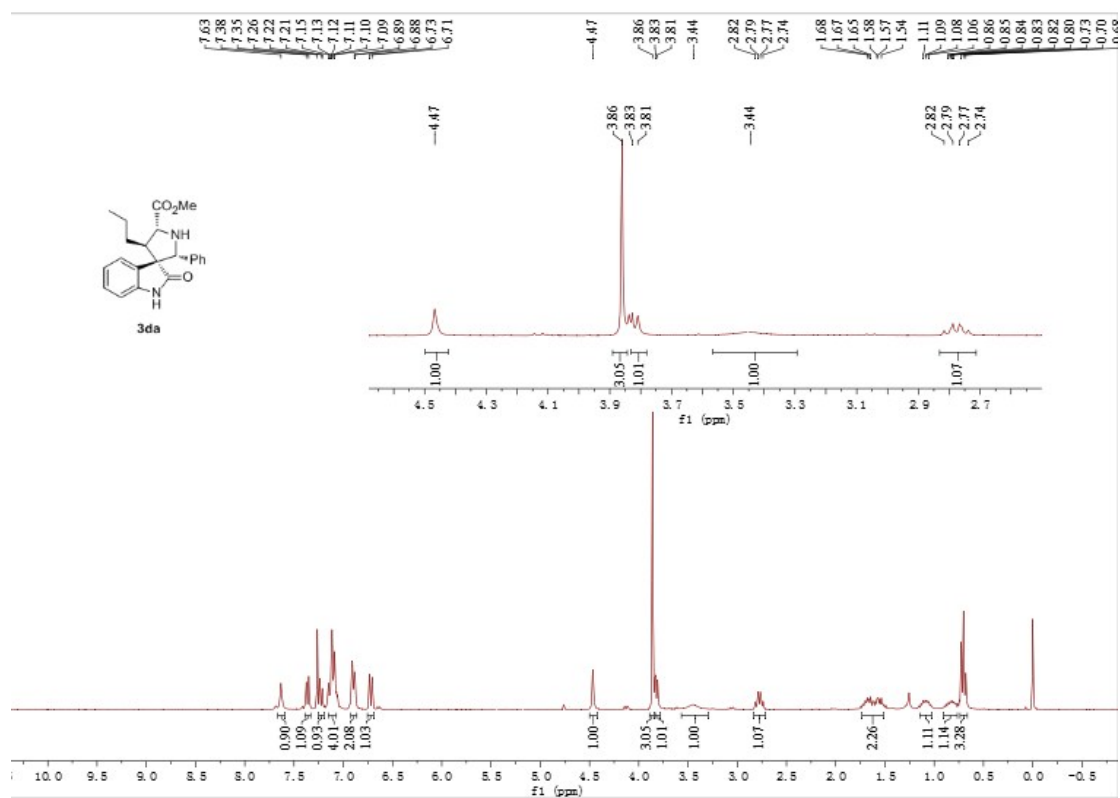

### <sup>13</sup>C NMR of 3da

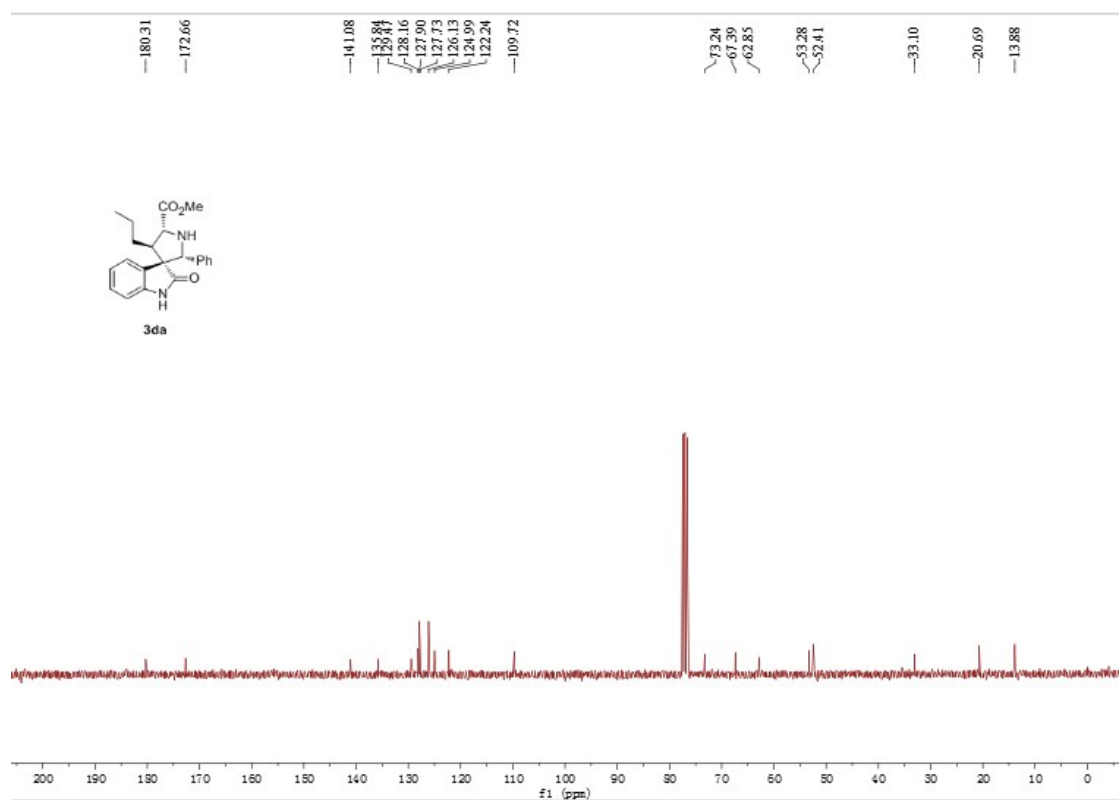

### <sup>1</sup>H NMR of 3ea

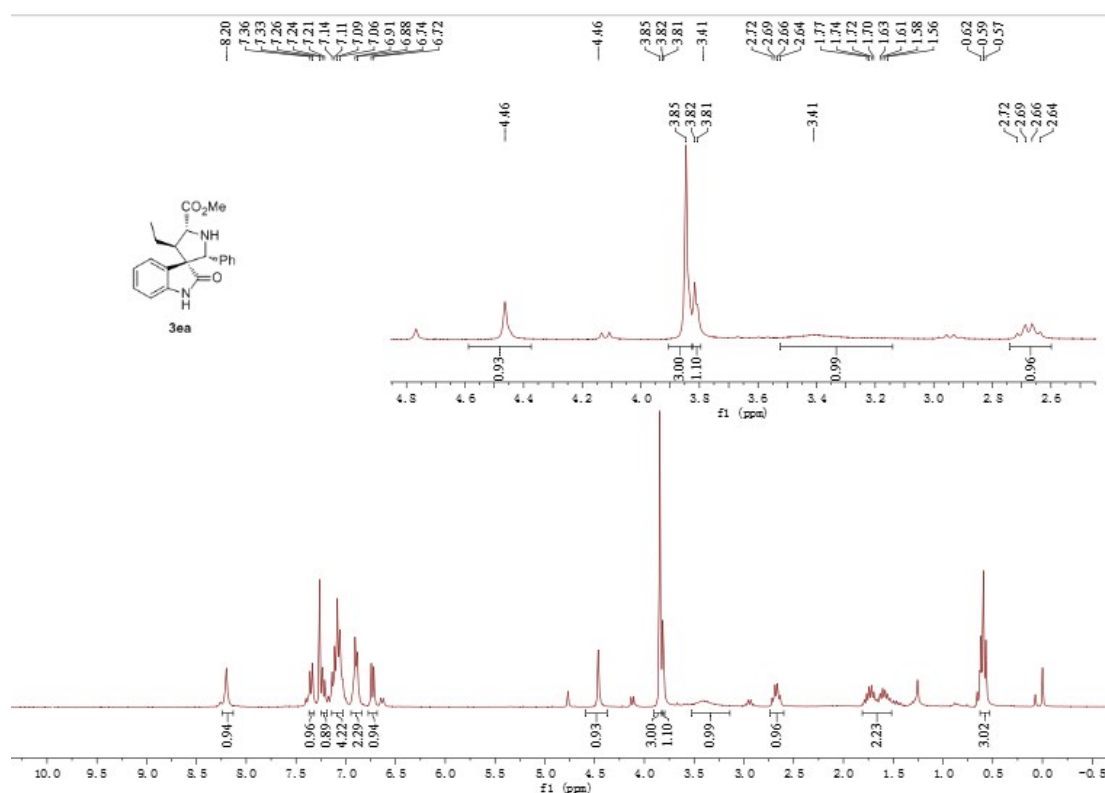

### <sup>13</sup>C NMR of 3ea

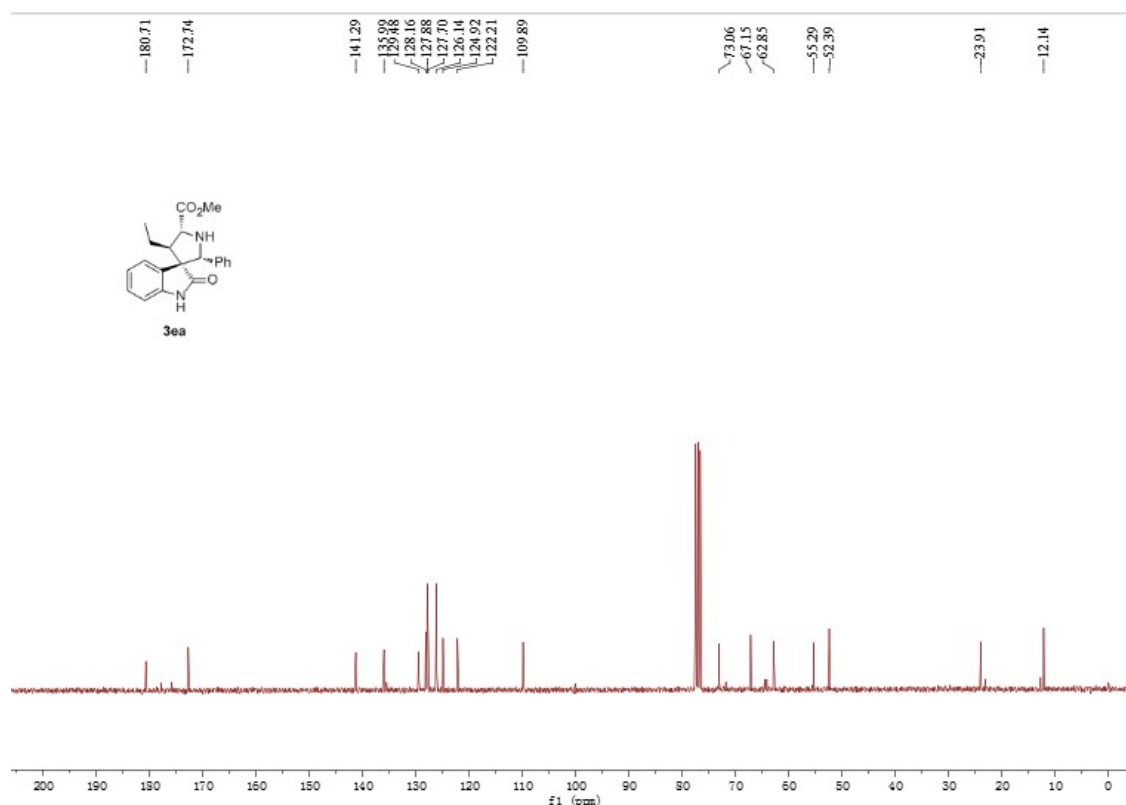



### <sup>1</sup>H NMR of 3fa

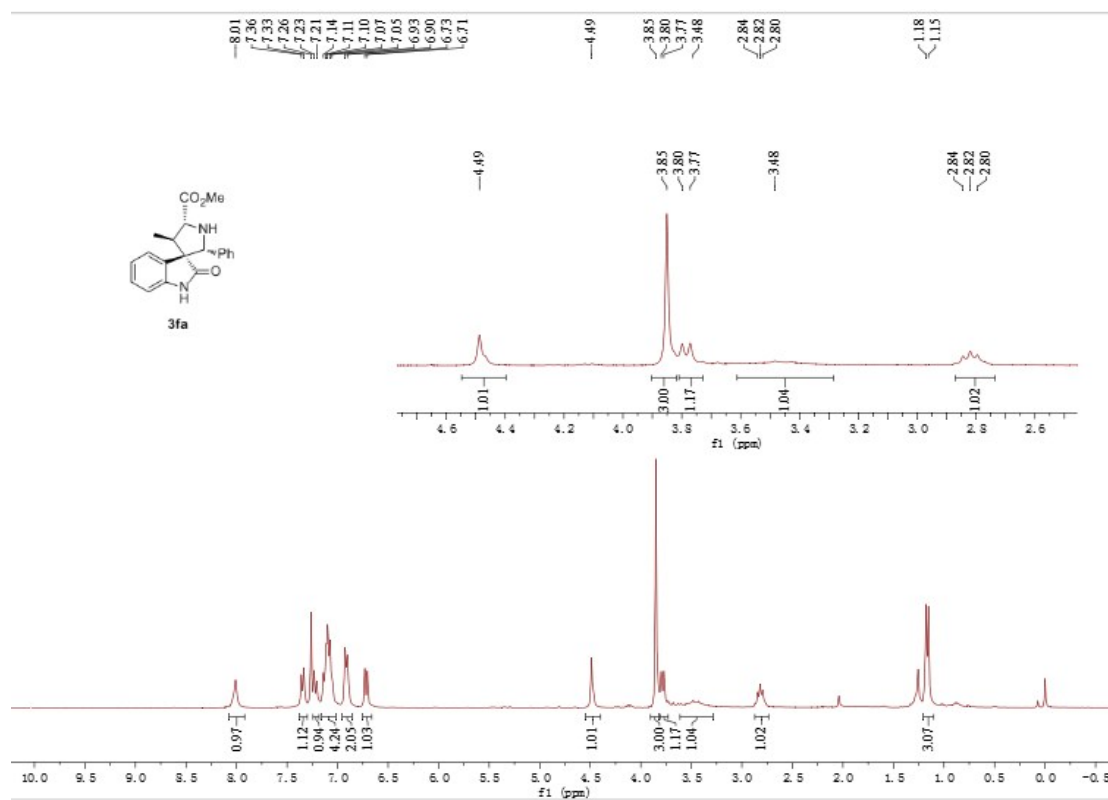

### <sup>13</sup>C NMR of 3fa

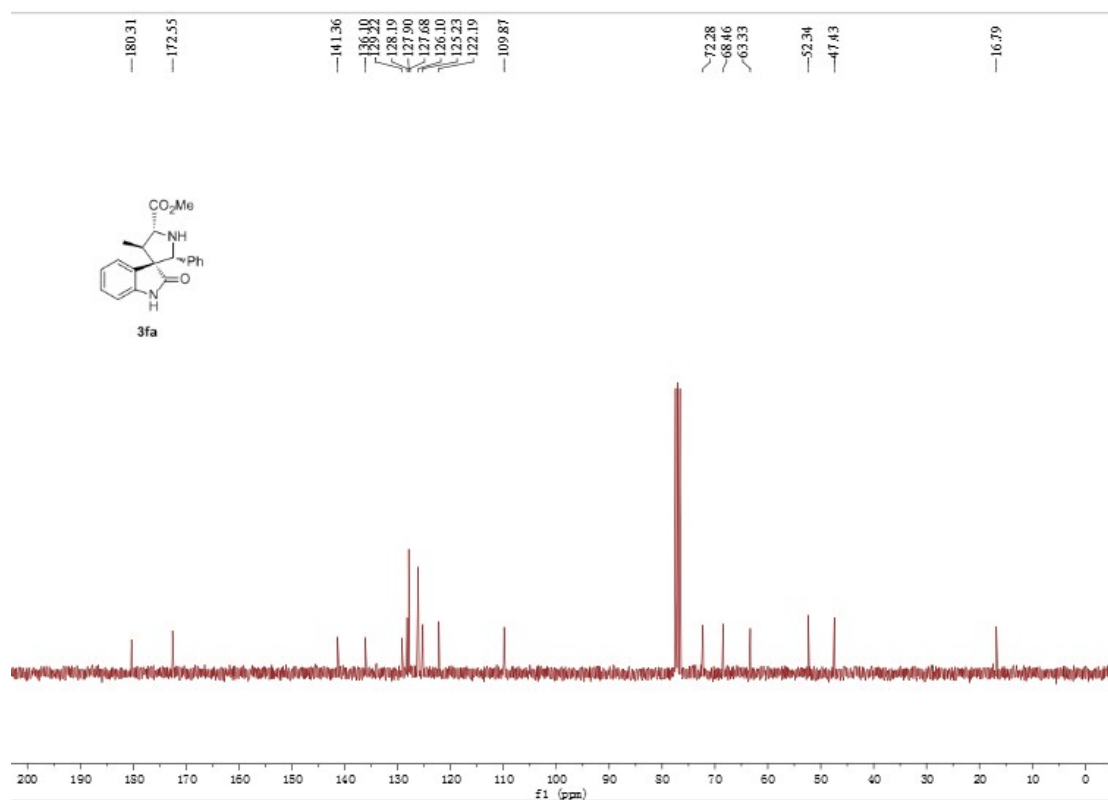

### <sup>1</sup>H NMR of 3ga

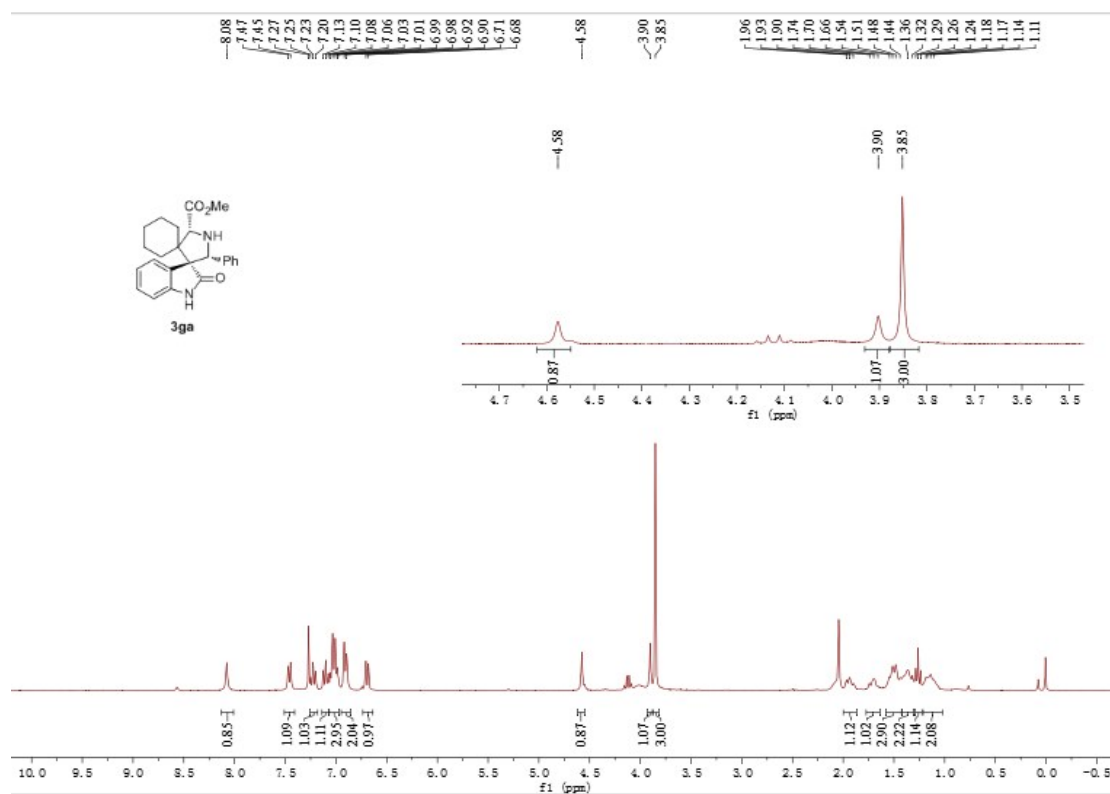

### <sup>13</sup>C NMR of 3ga

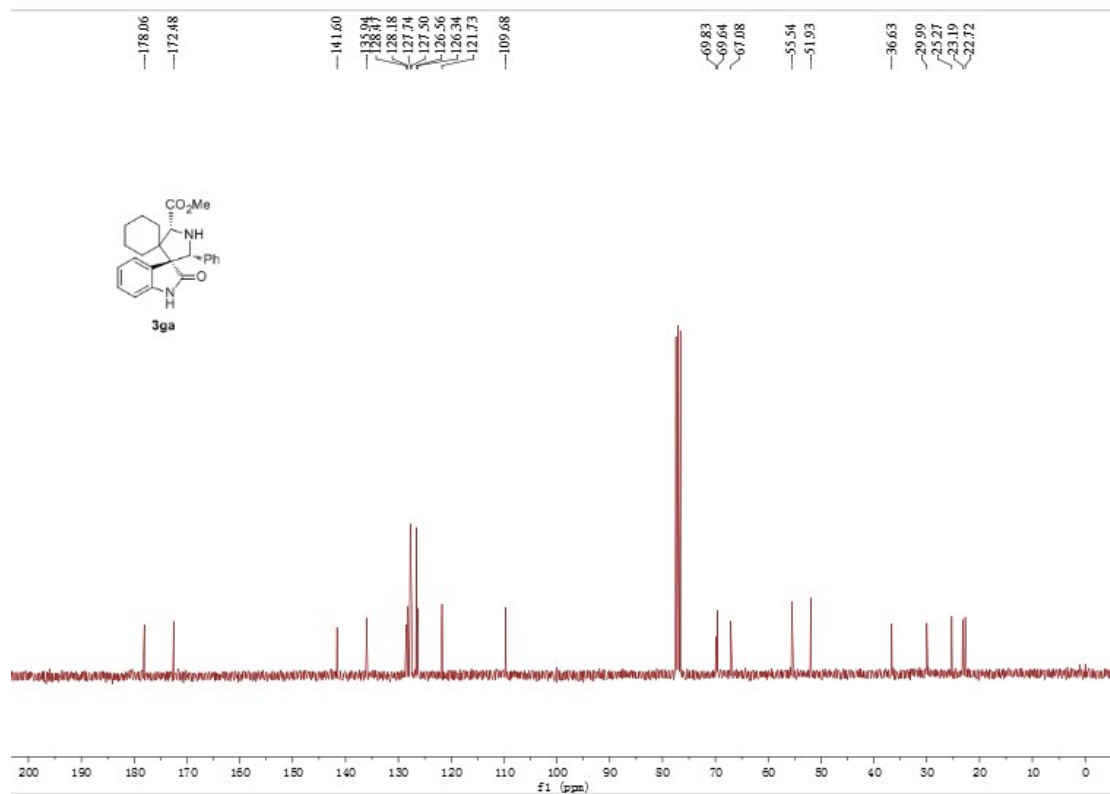

### <sup>1</sup>H NMR of 3ha

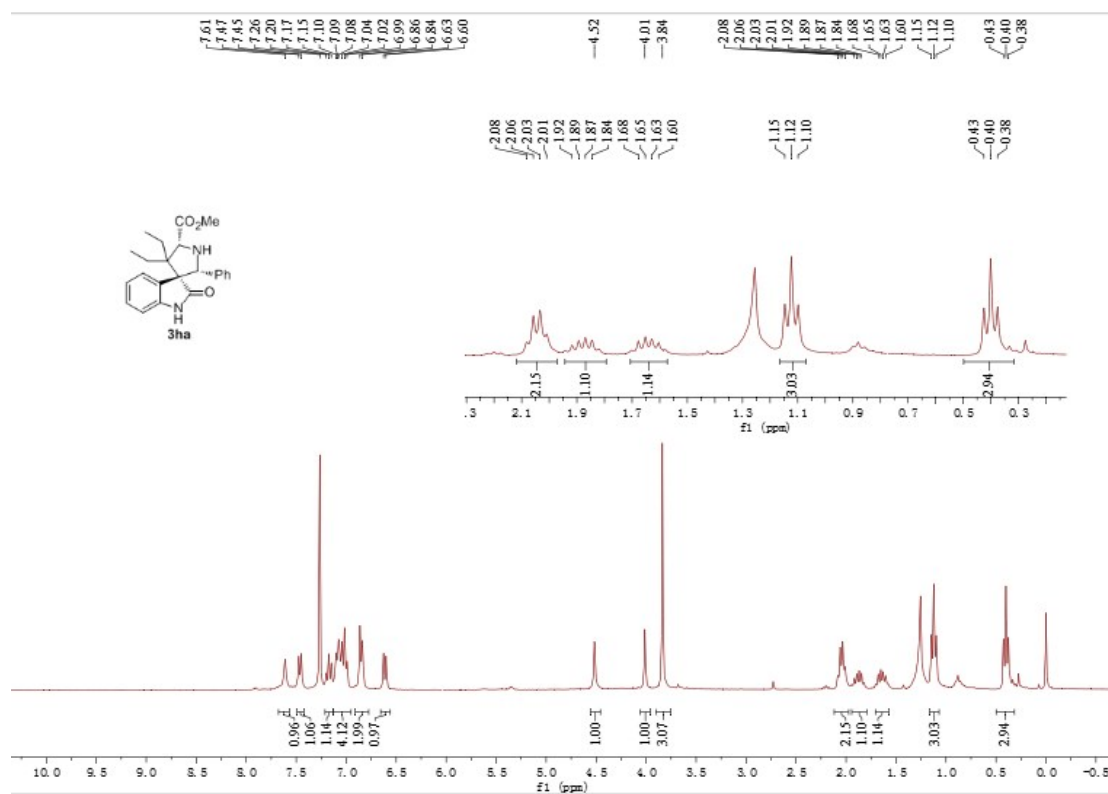

### <sup>13</sup>C NMR of 3ha

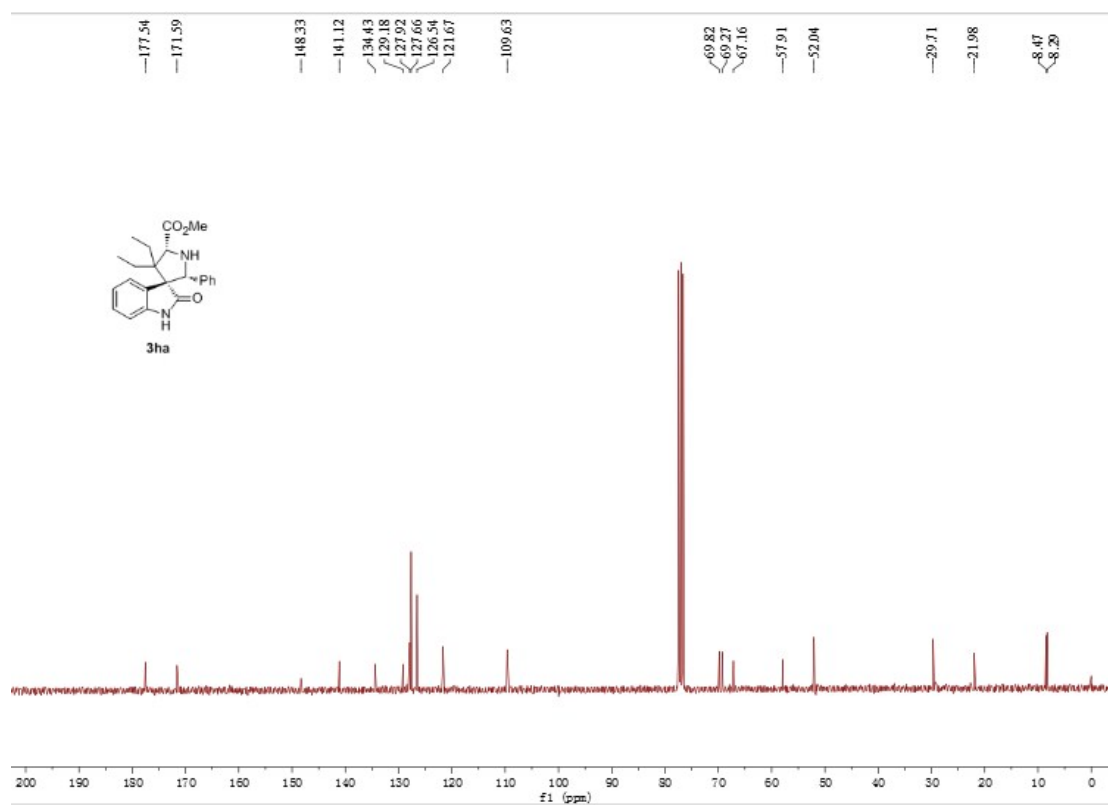

### <sup>1</sup>H NMR of 3ia

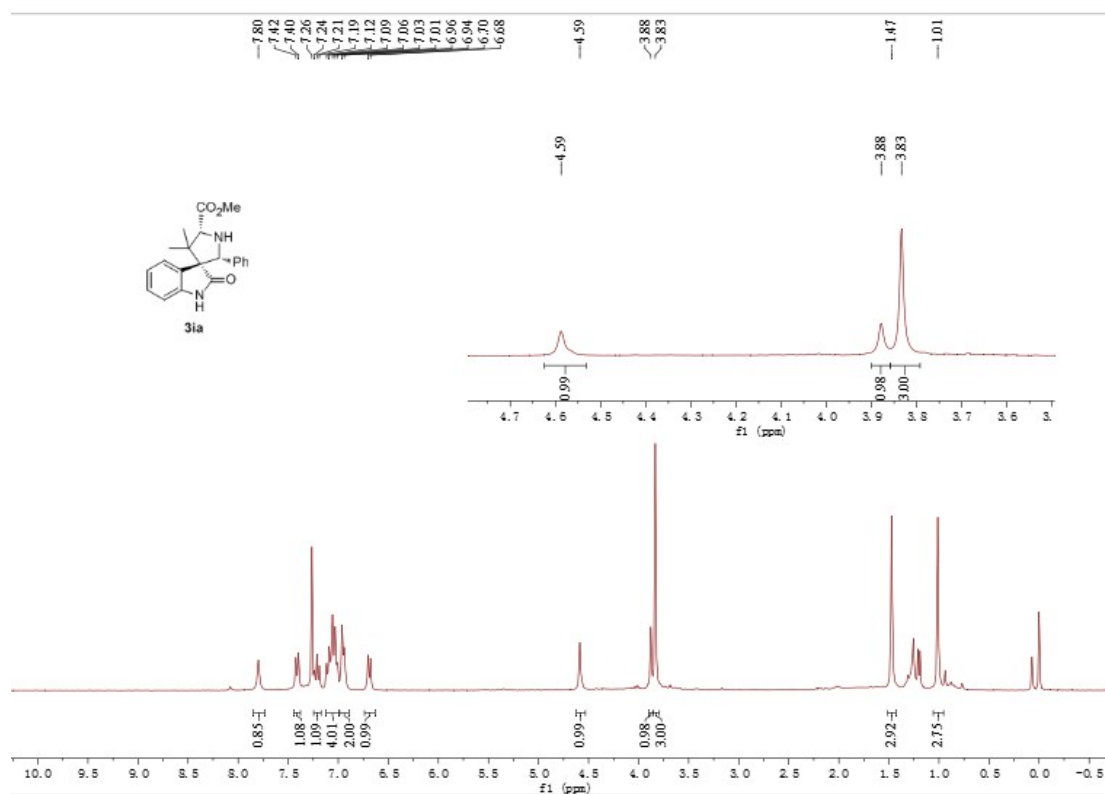

### <sup>13</sup>C NMR of 3ia

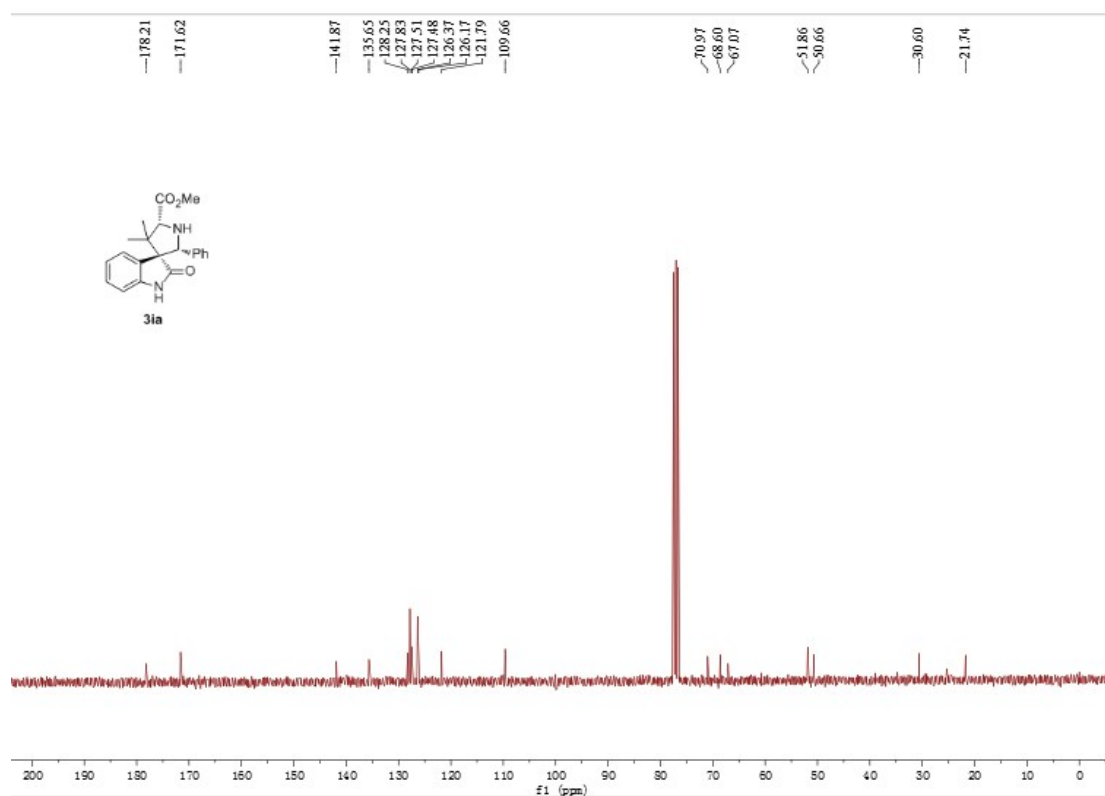

### <sup>1</sup>H NMR of 3ja

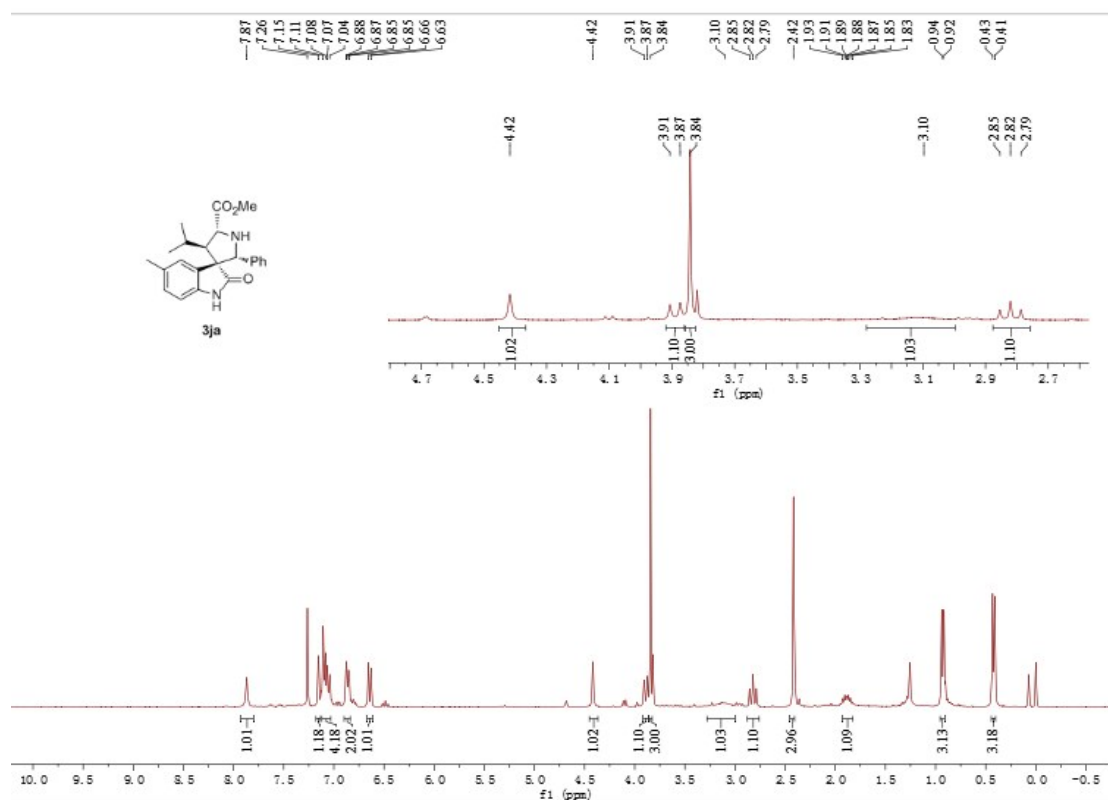

### <sup>13</sup>C NMR of 3ja

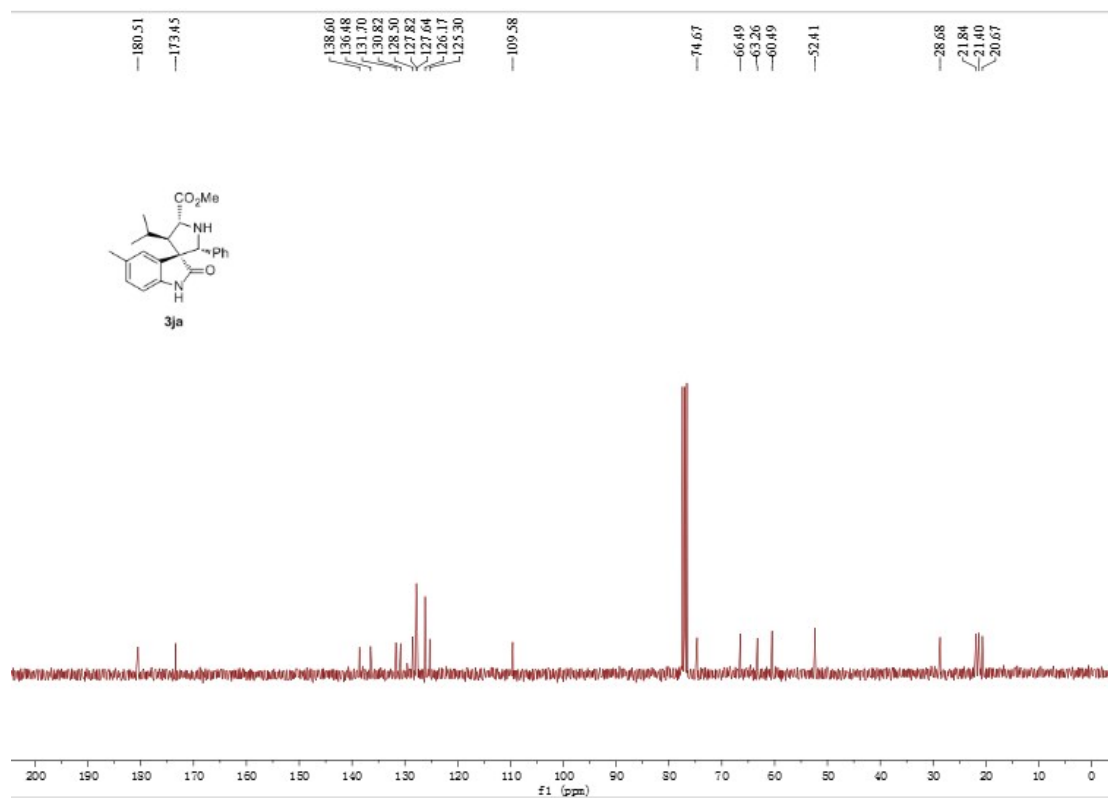

### <sup>1</sup>H NMR of 3ka

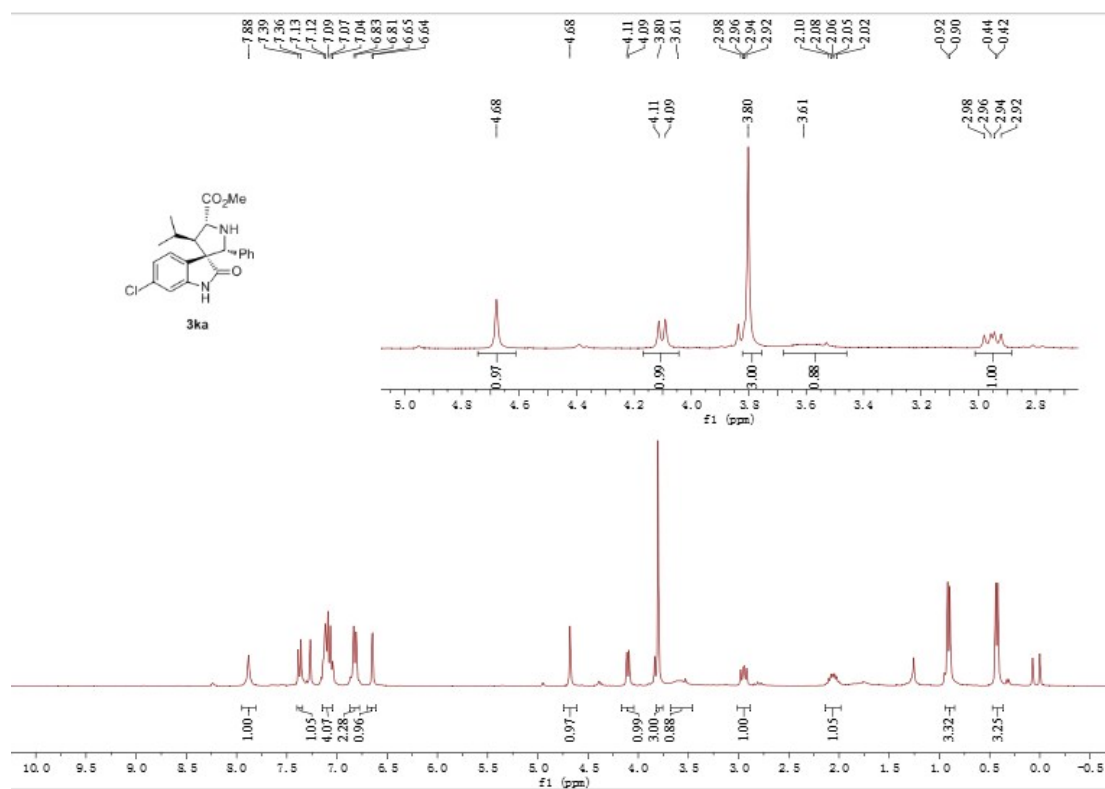

### <sup>13</sup>C NMR of 3ka

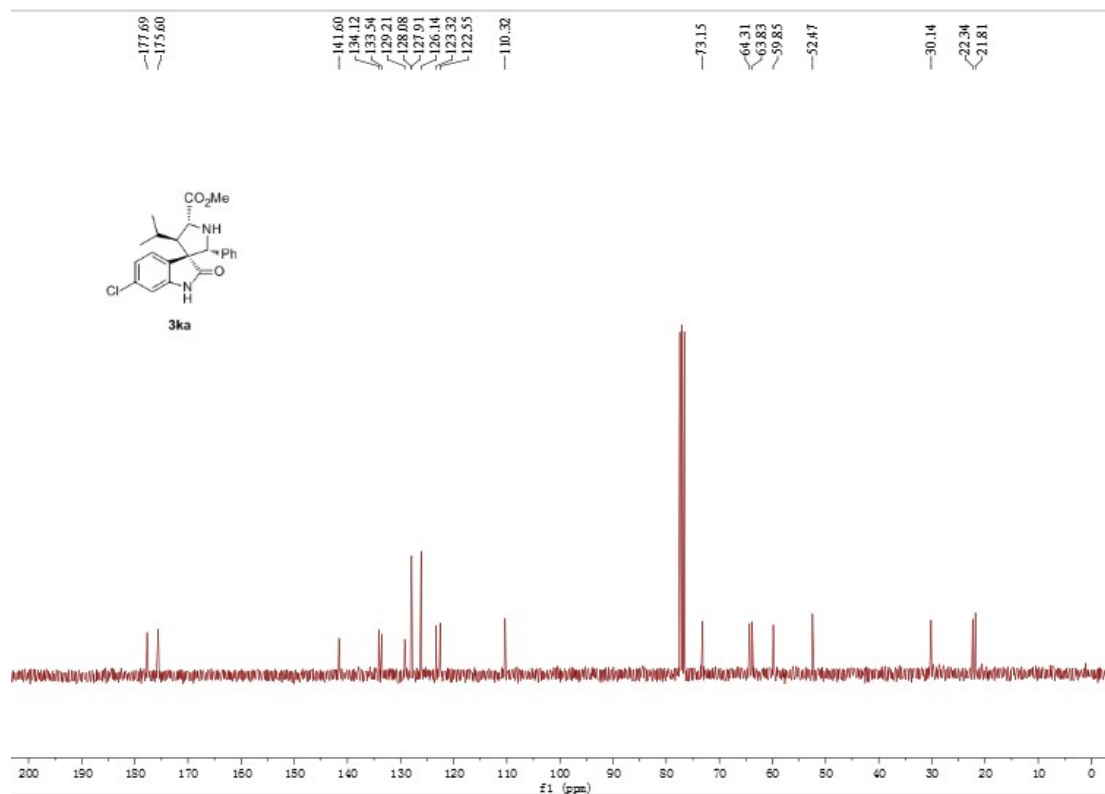

### <sup>1</sup>H NMR of 3ab

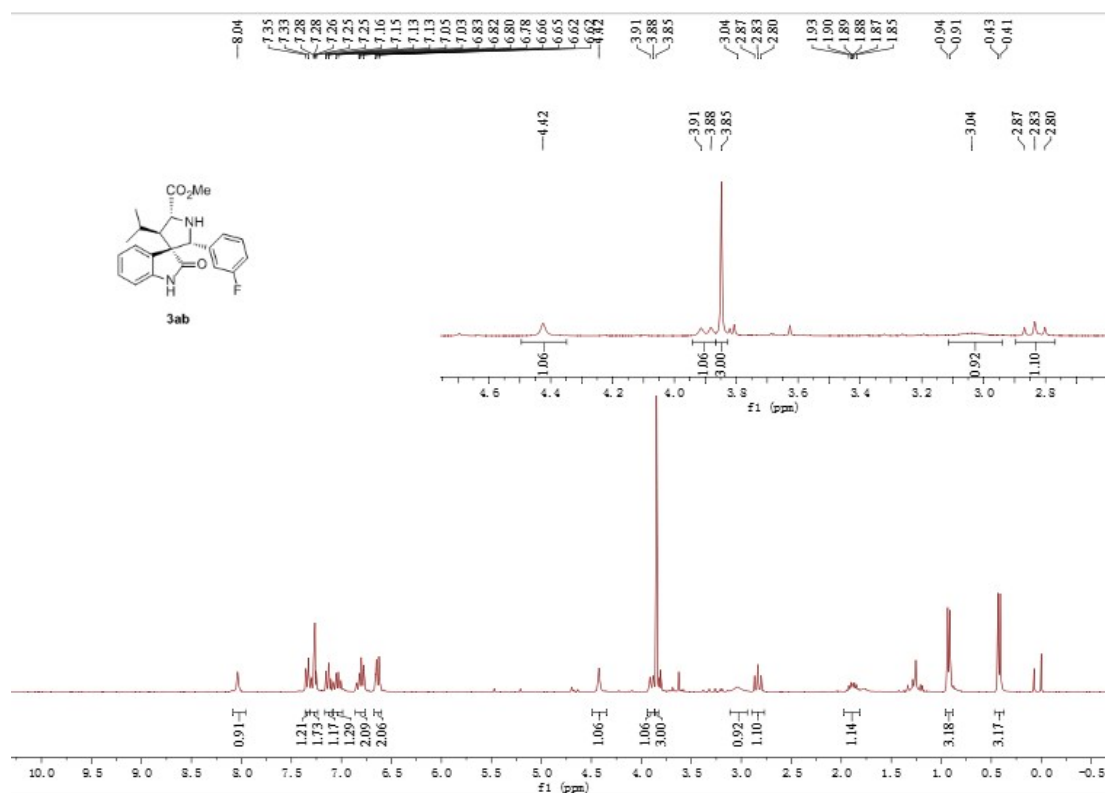

### <sup>13</sup>C NMR of 3ab

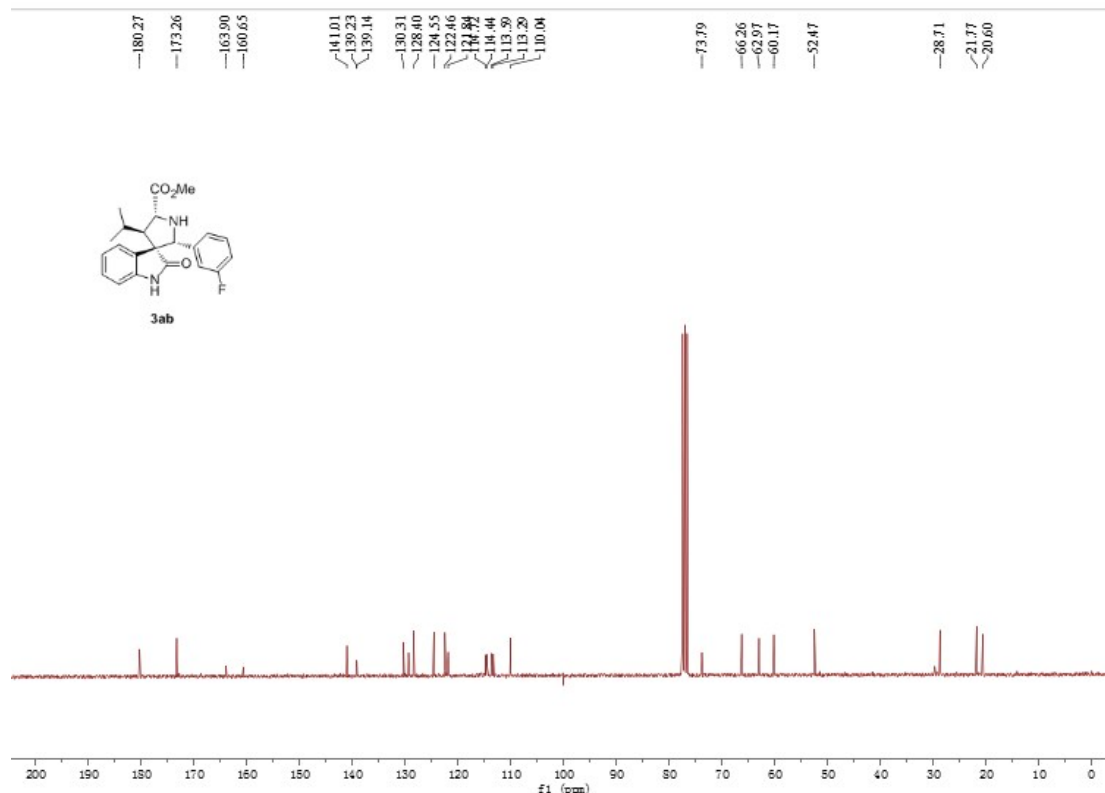

### <sup>1</sup>H NMR of 3ac

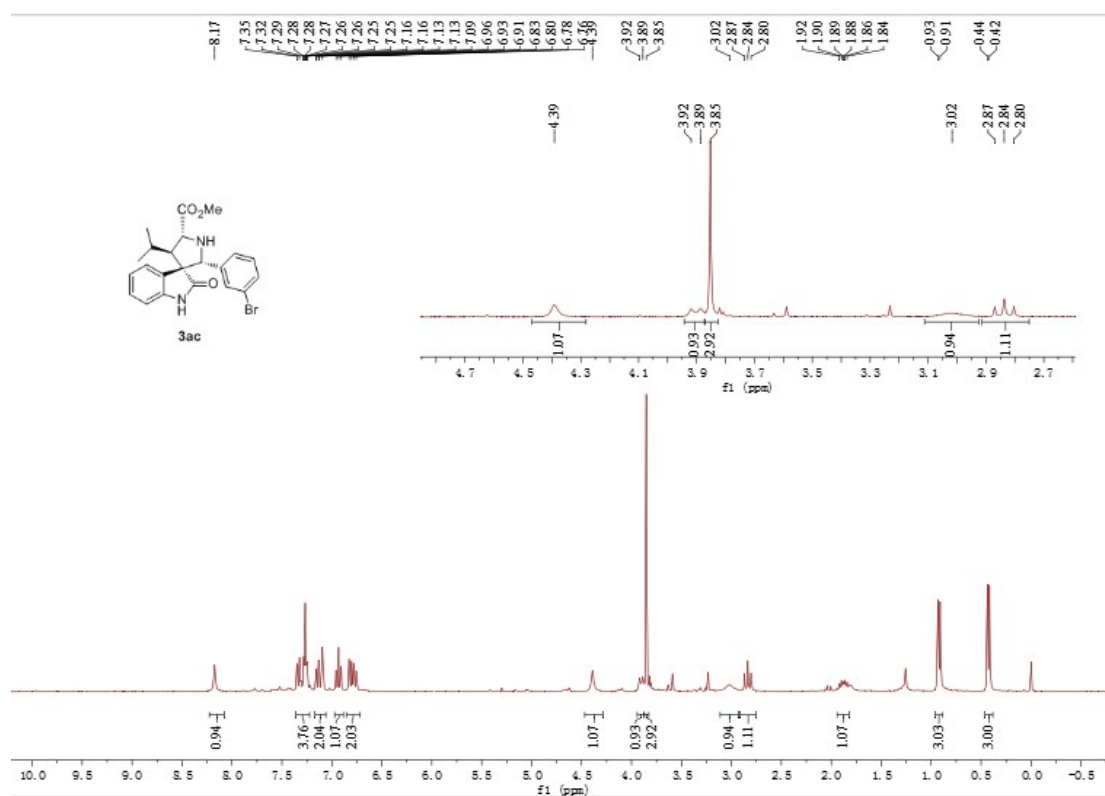

### <sup>13</sup>C NMR of 3ac

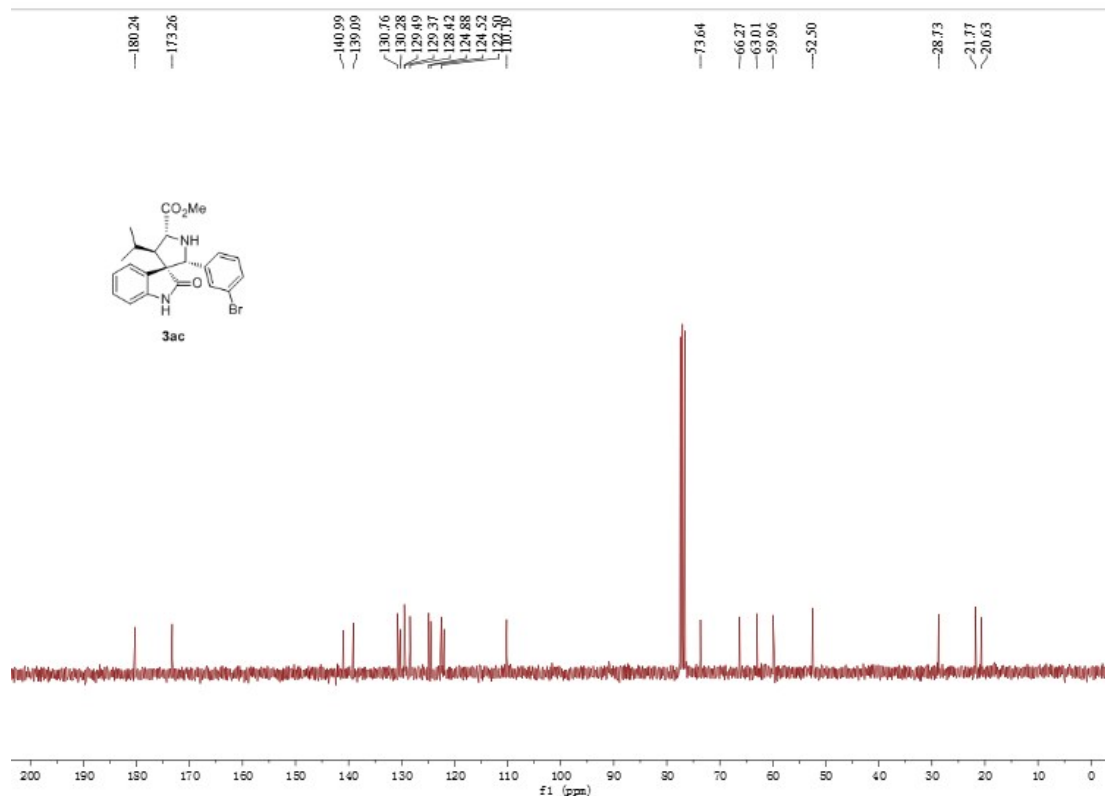



### <sup>1</sup>H NMR of 3ad

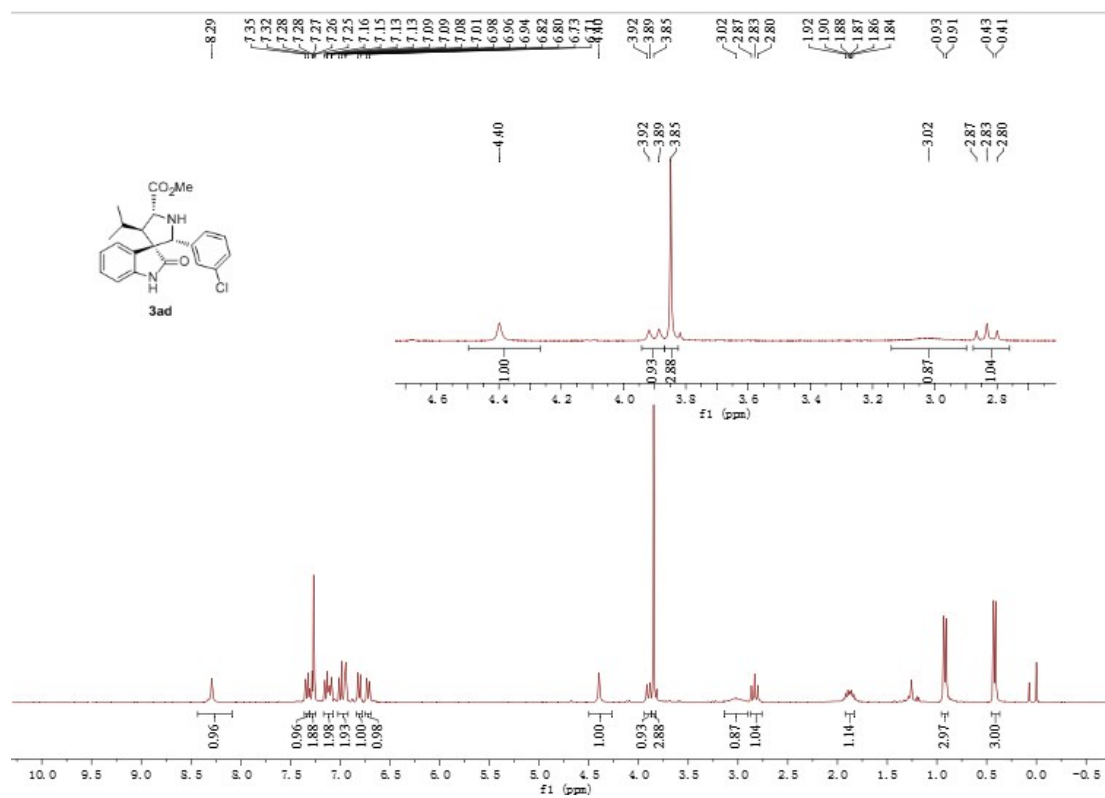

### <sup>13</sup>C NMR of 3ad

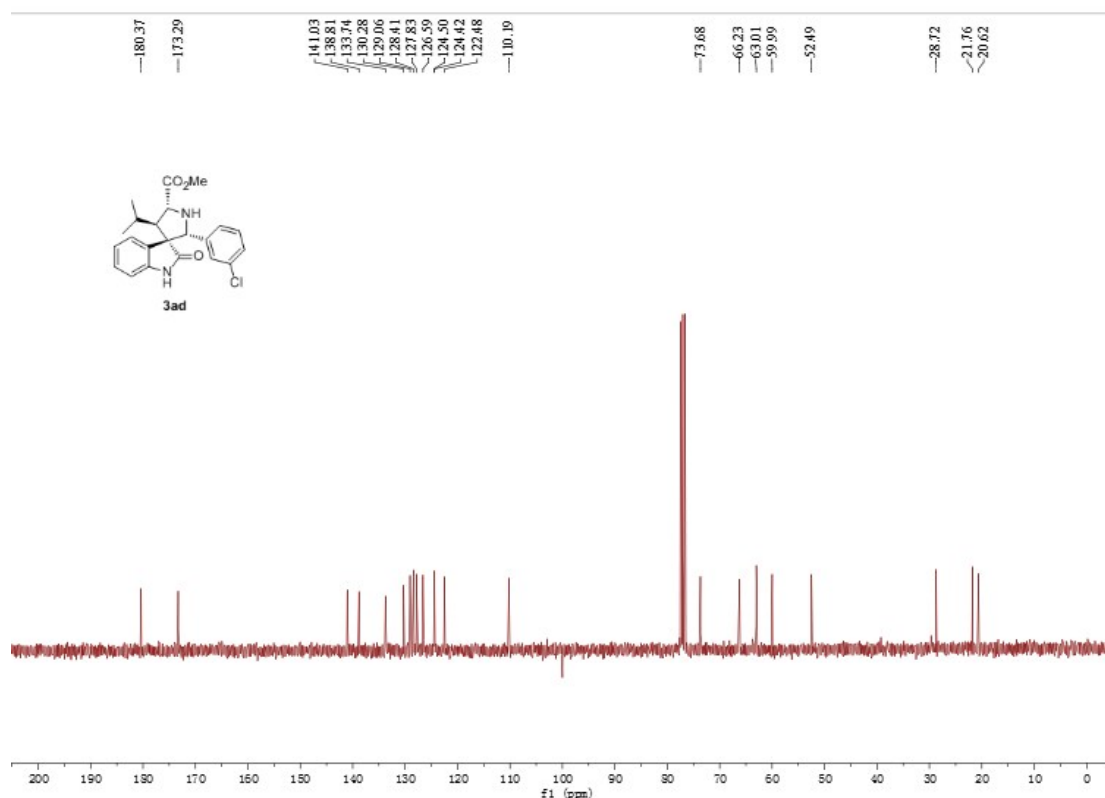

### <sup>1</sup>H NMR of 3ae

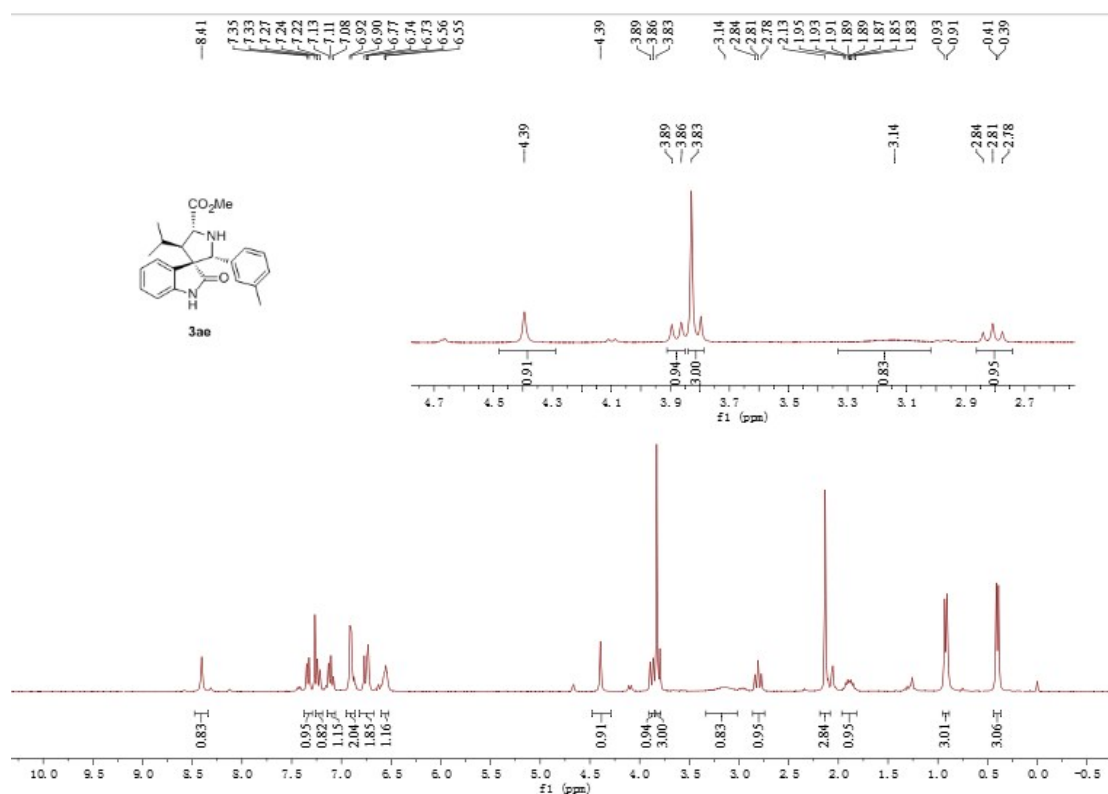

### <sup>13</sup>C NMR of 3ae

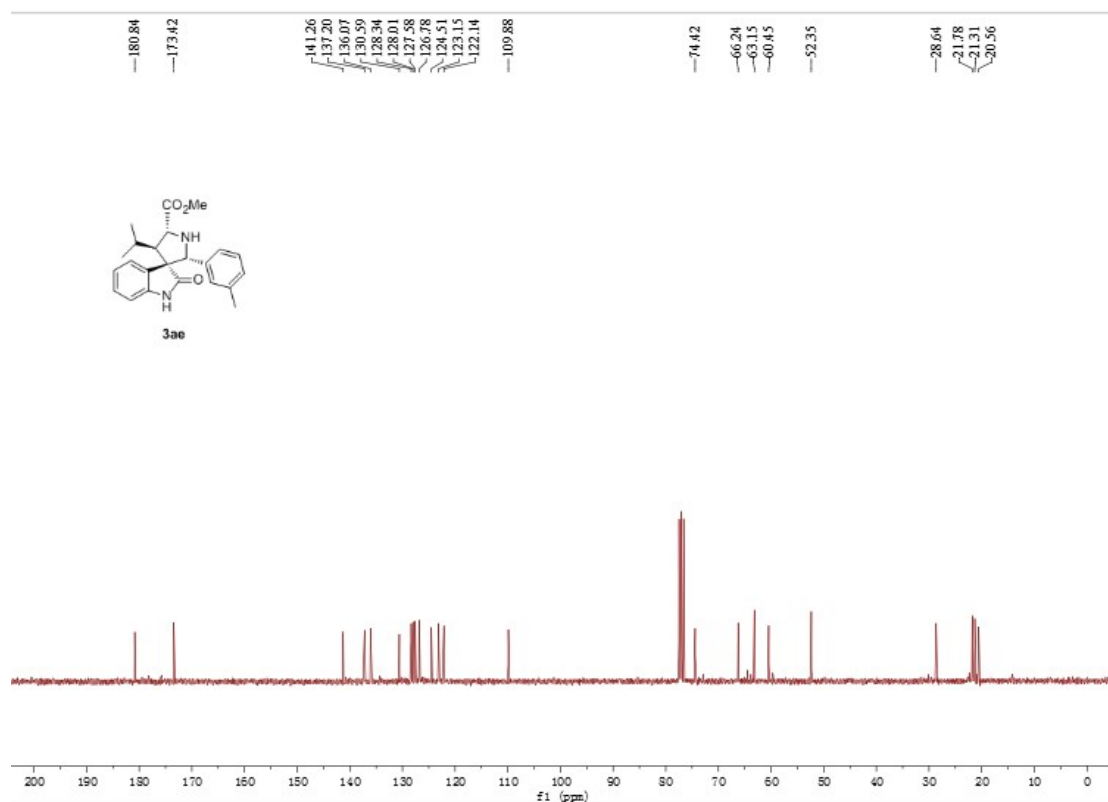

# <sup>1</sup>H NMR of 3af

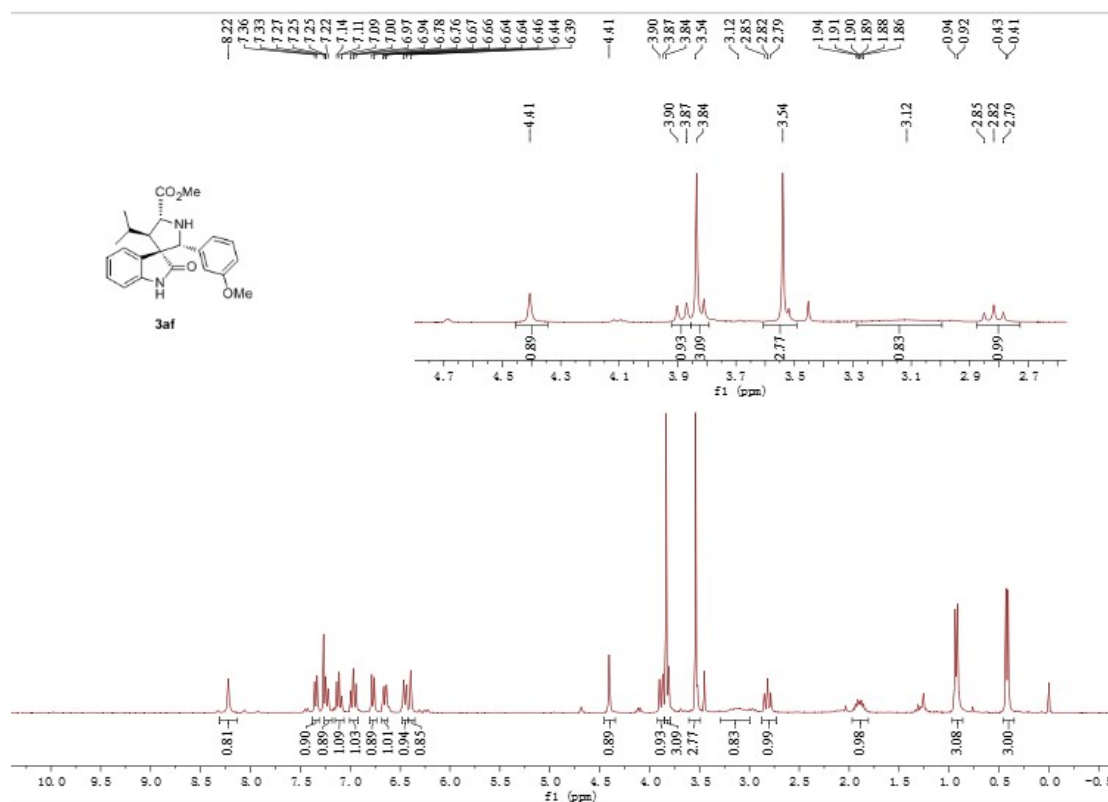

# <sup>13</sup>C NMR of 3af

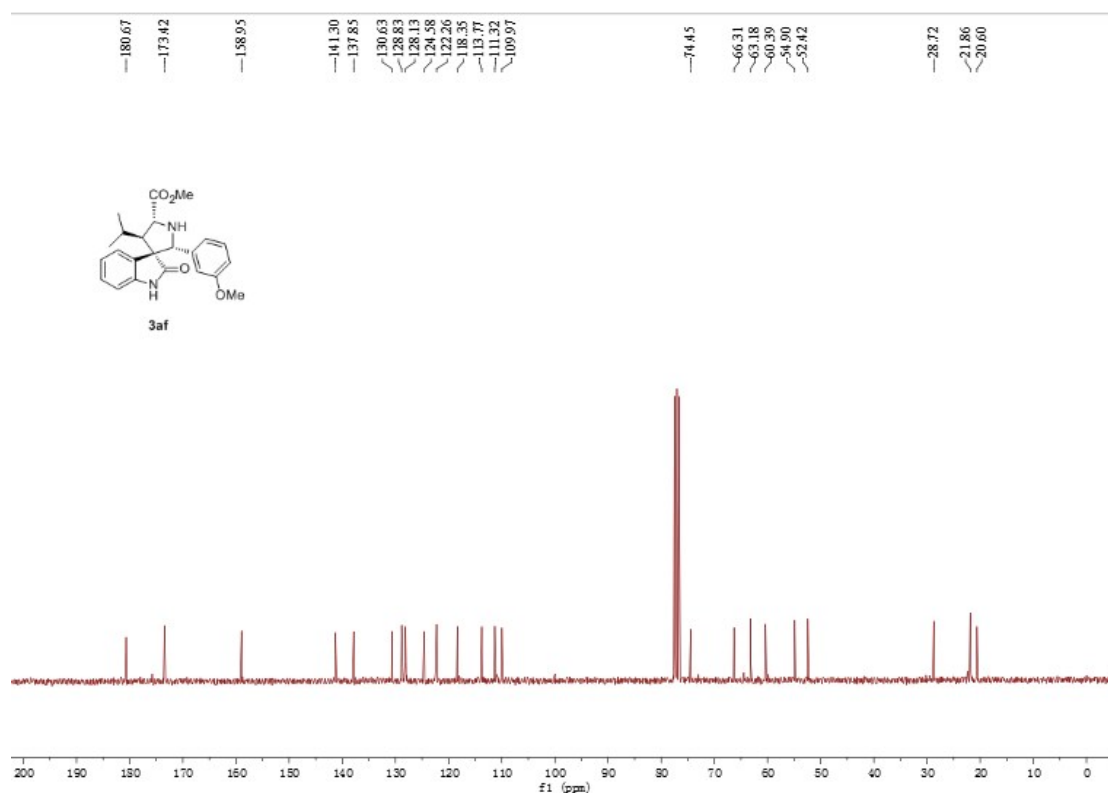

## <sup>1</sup>H NMR of 3ag

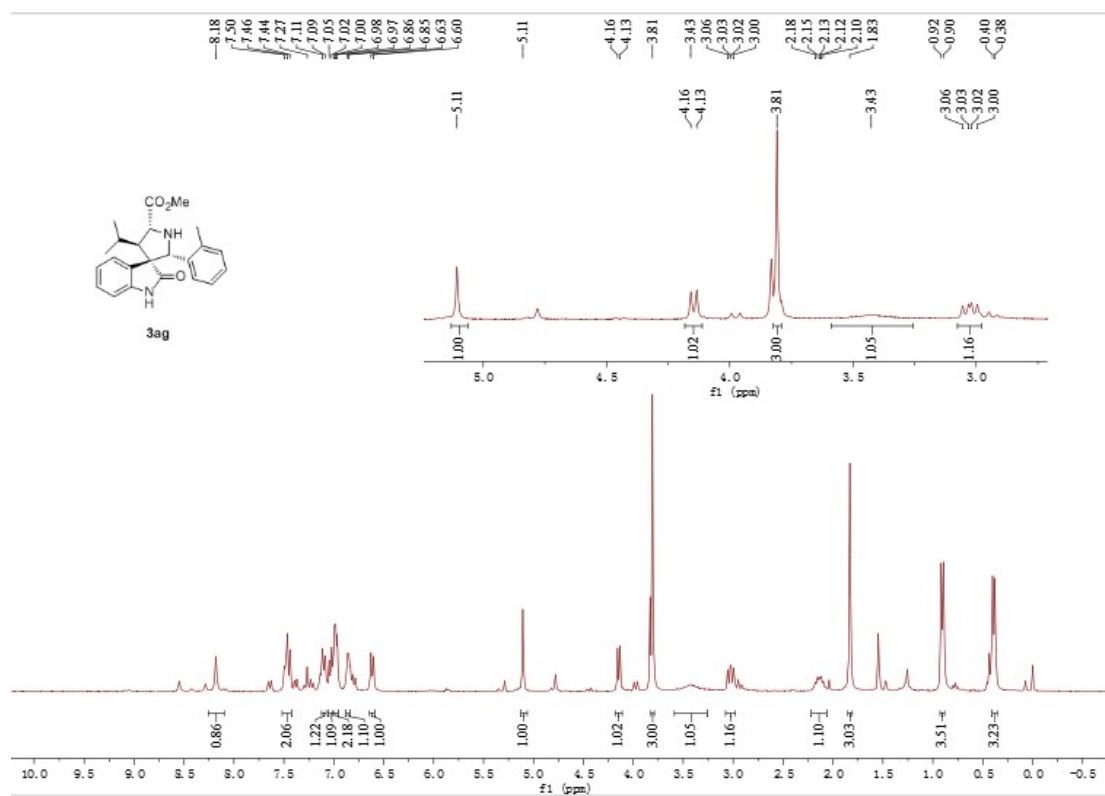

## <sup>13</sup>C NMR of 3ag

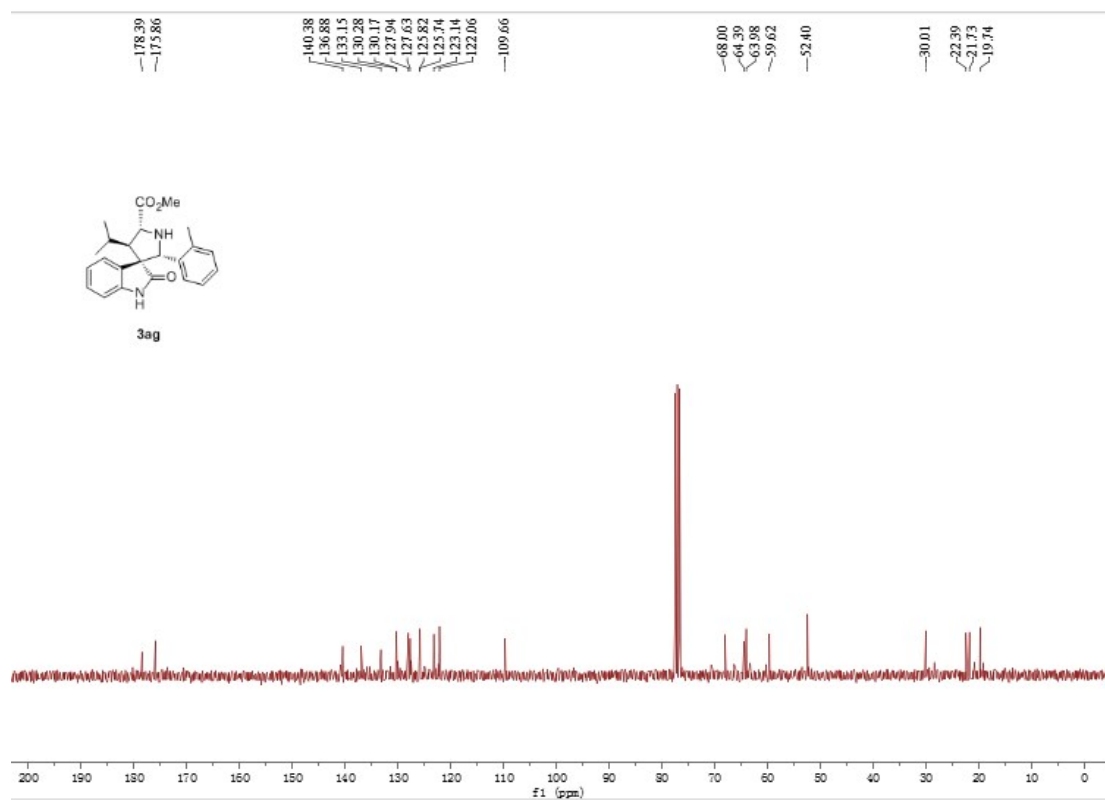

### <sup>1</sup>H NMR of 3ah

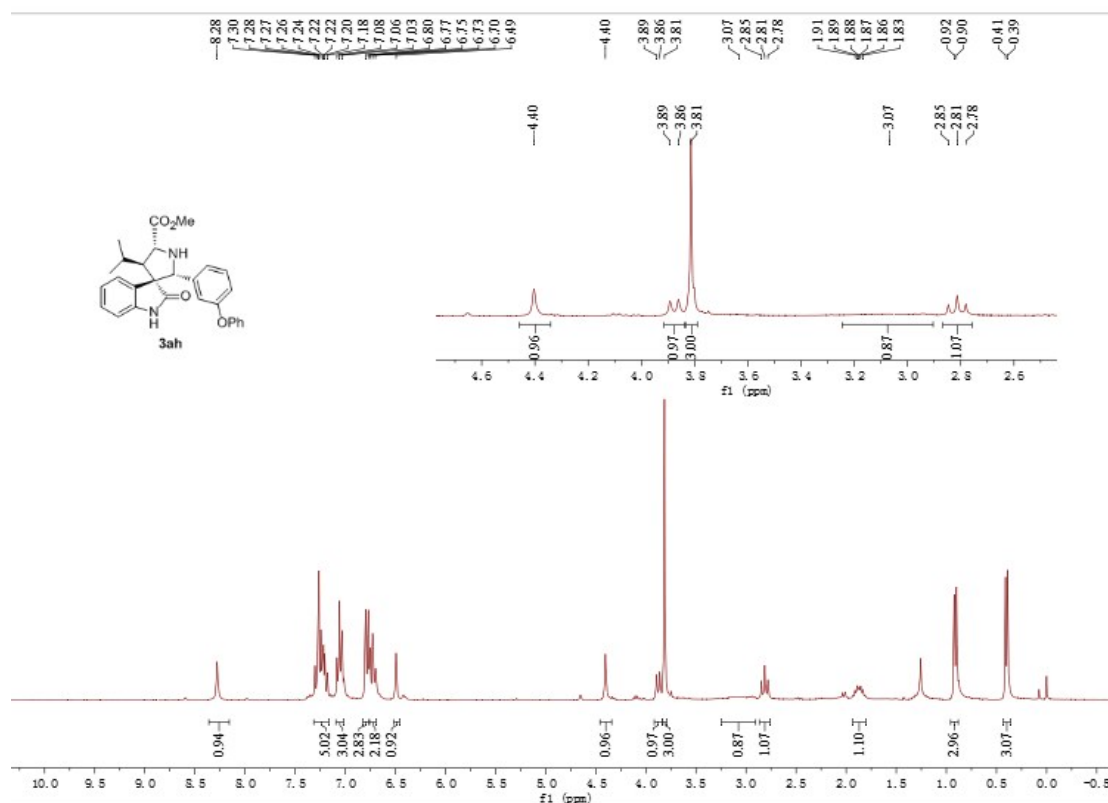

### <sup>13</sup>C NMR of 3ah

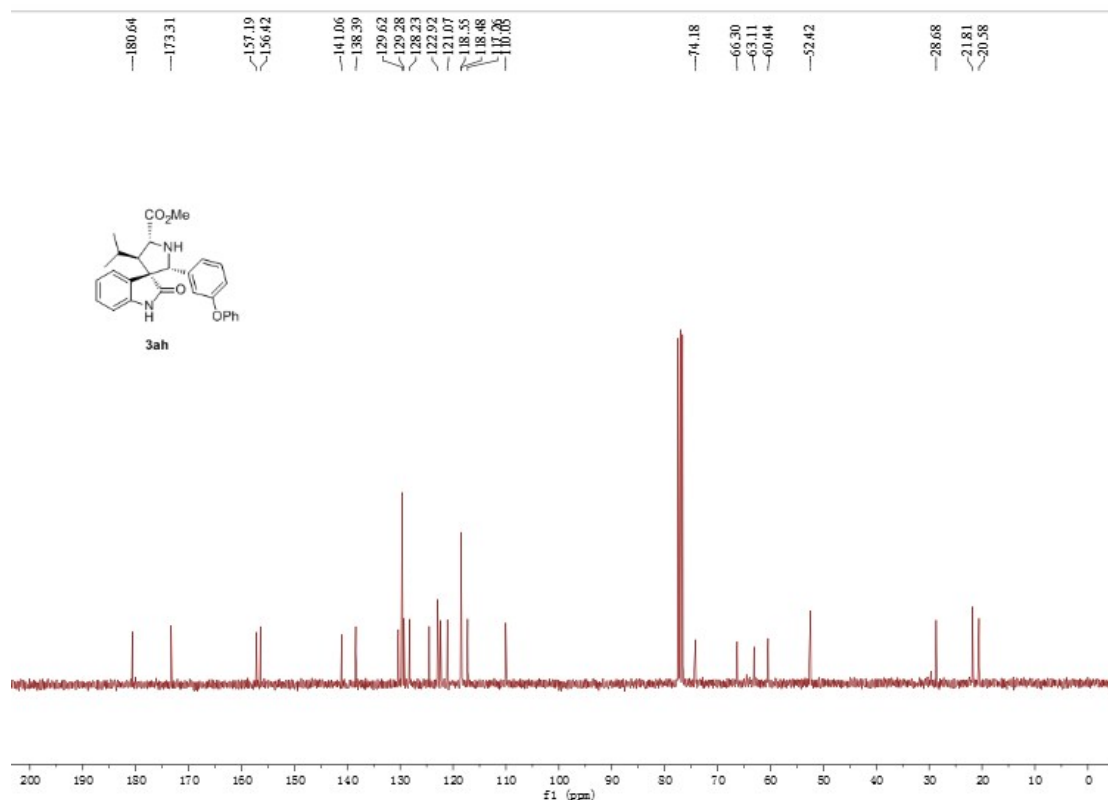

### <sup>1</sup>H NMR of 3ai

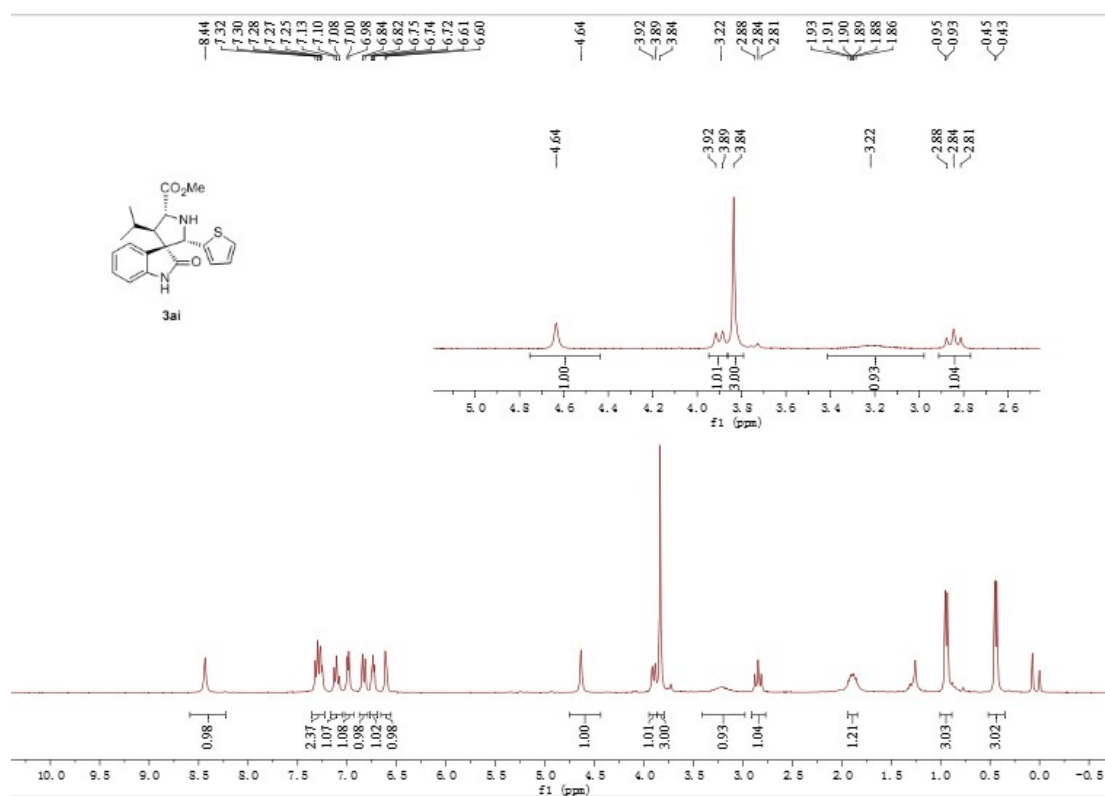

### <sup>13</sup>C NMR of 3ai

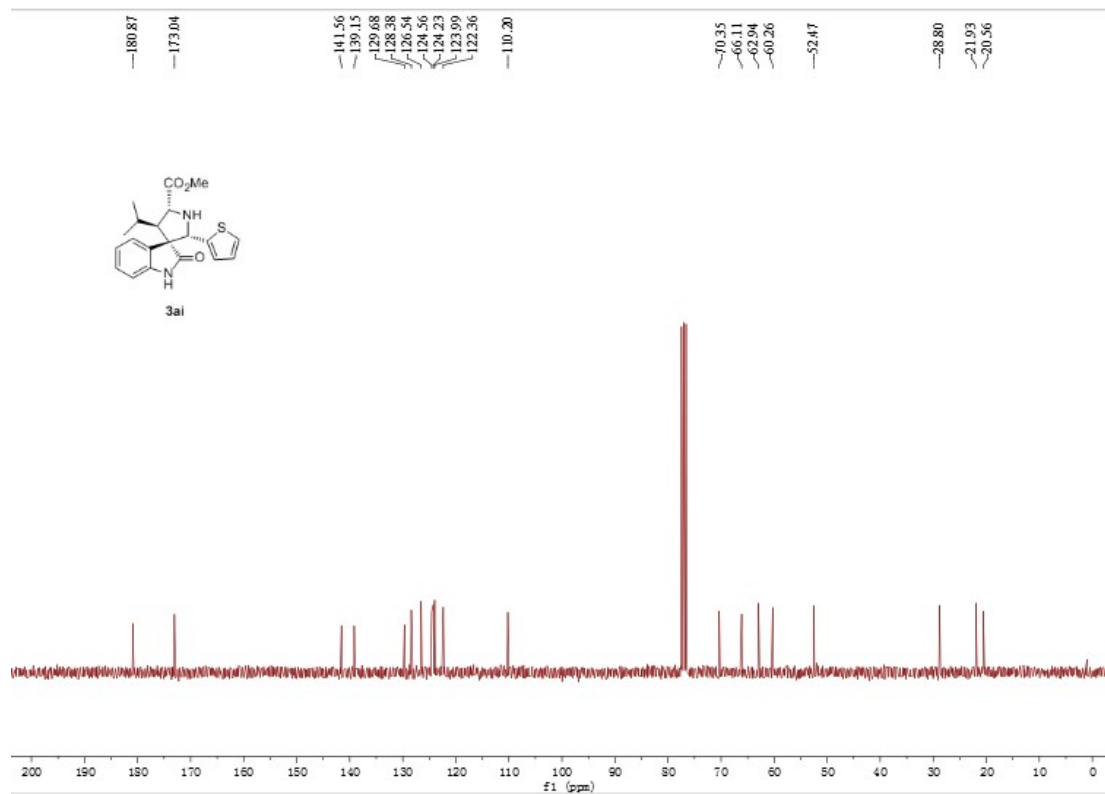

### <sup>1</sup>H NMR of 3la

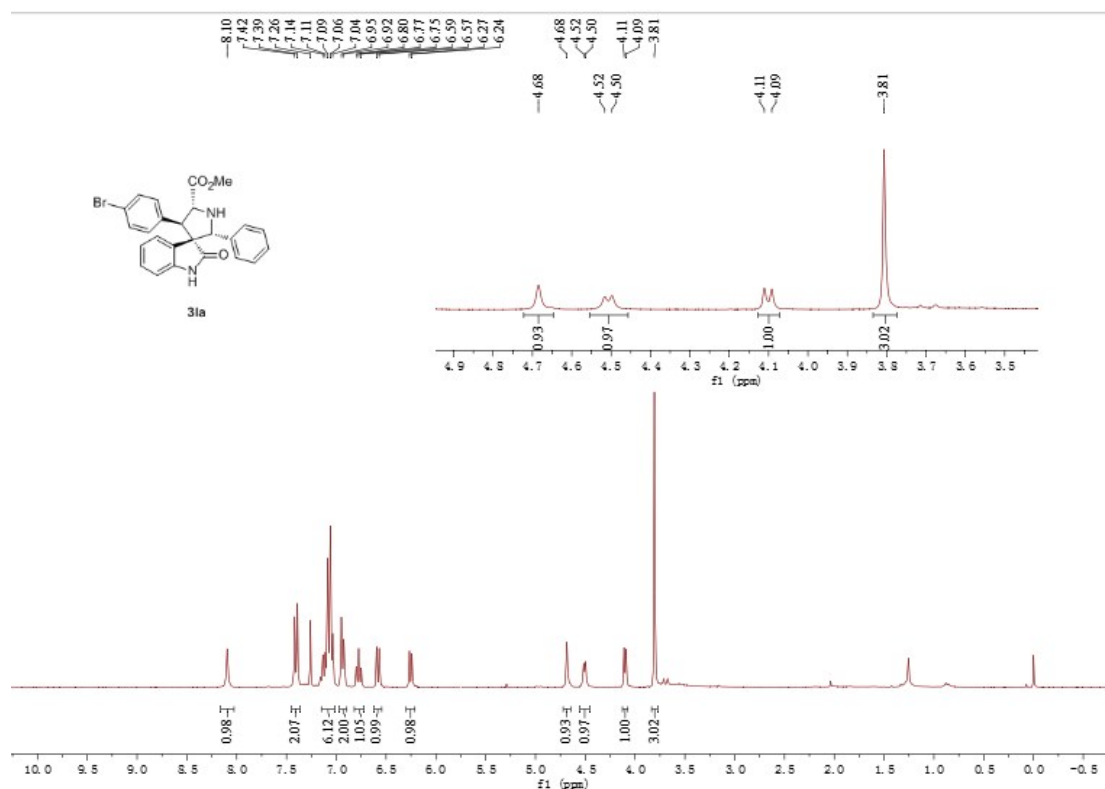

### <sup>13</sup>C NMR of 3la

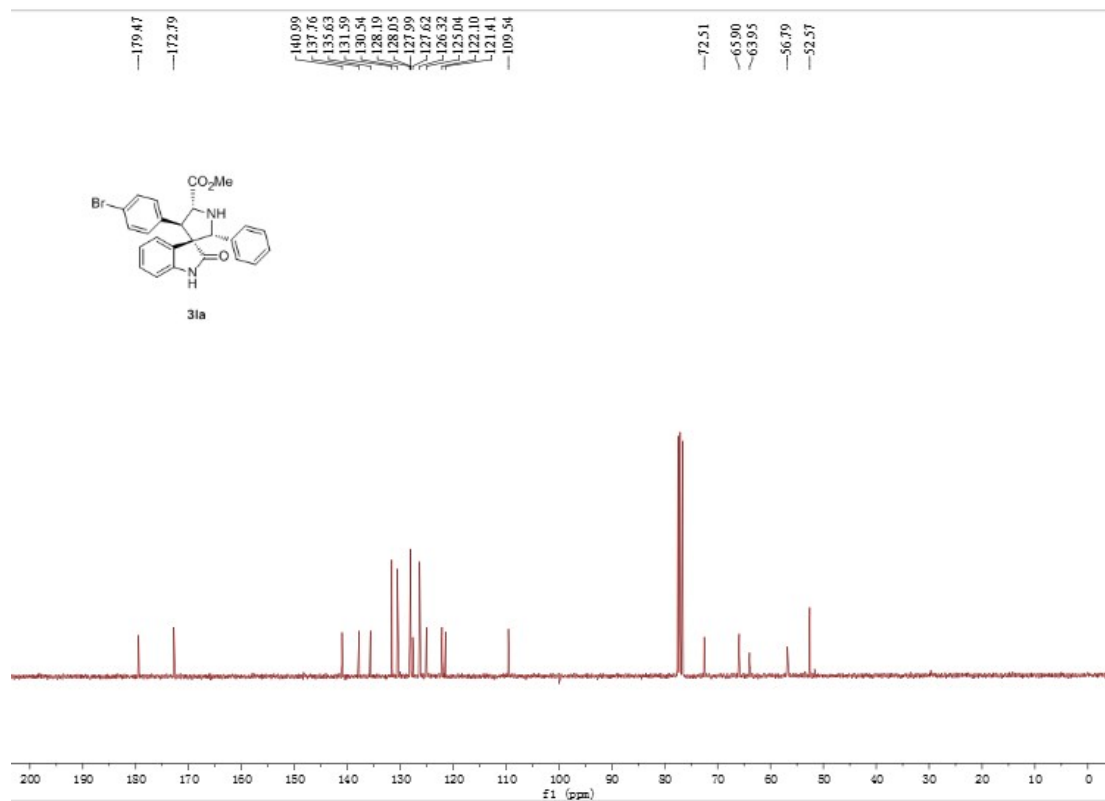

### <sup>1</sup>H NMR of 3lc

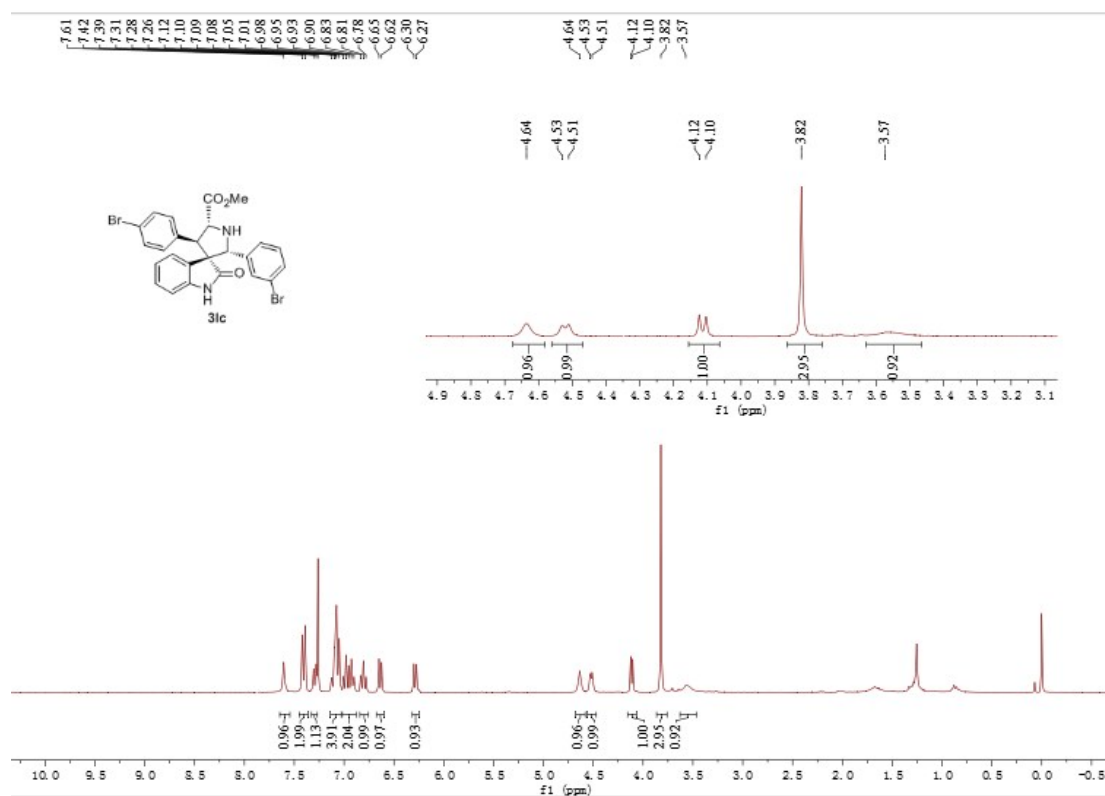

### <sup>13</sup>C NMR of 3lc

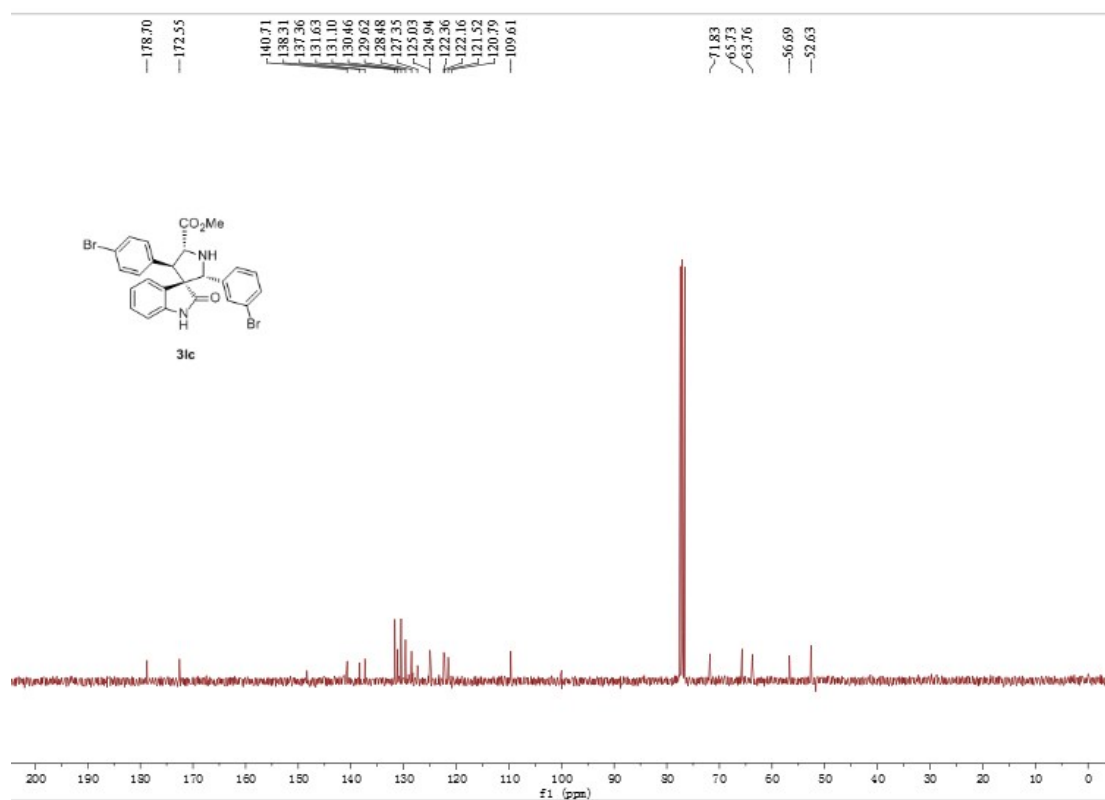



### <sup>1</sup>H NMR of 3lj

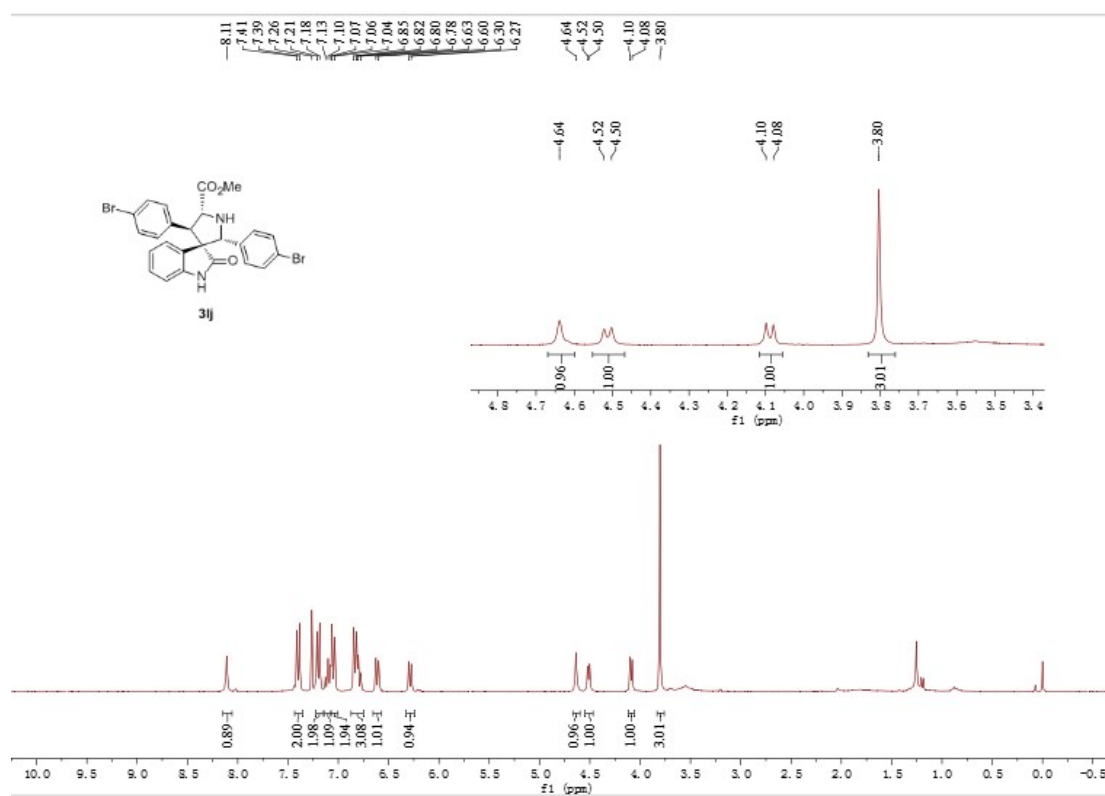

### <sup>13</sup>C NMR of 3lj

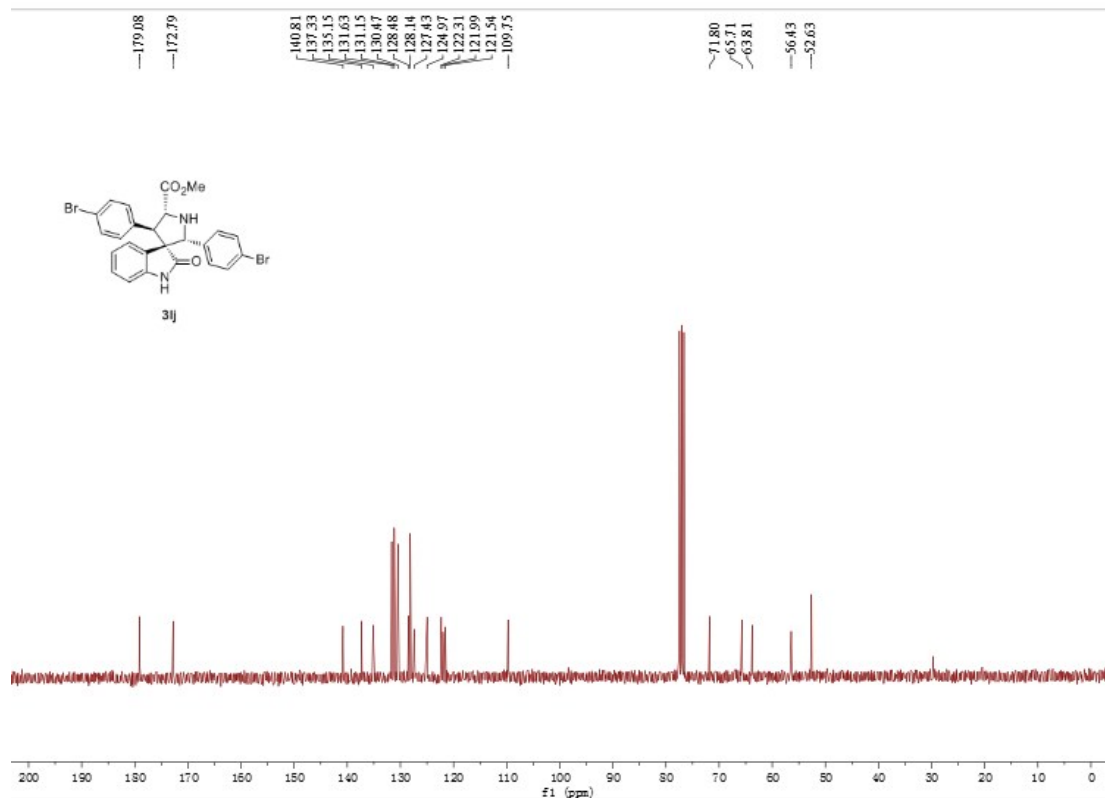

### <sup>1</sup>H NMR of 3mk

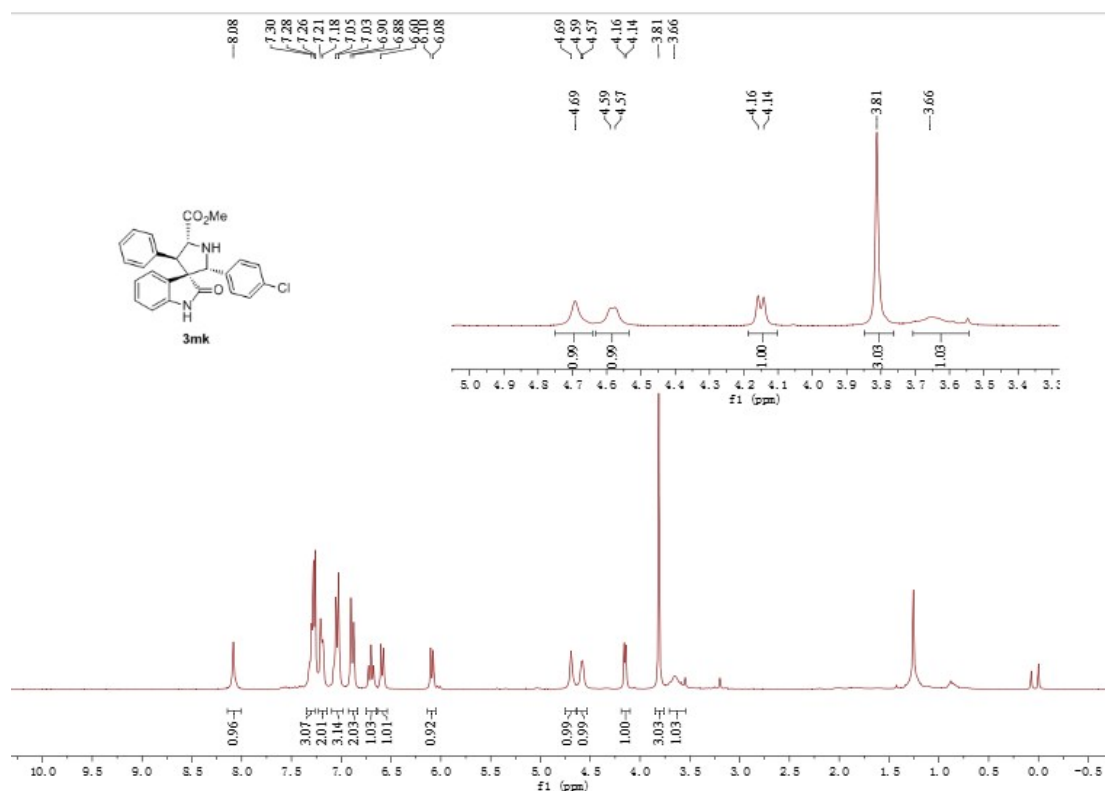

### <sup>13</sup>C NMR of 3mk

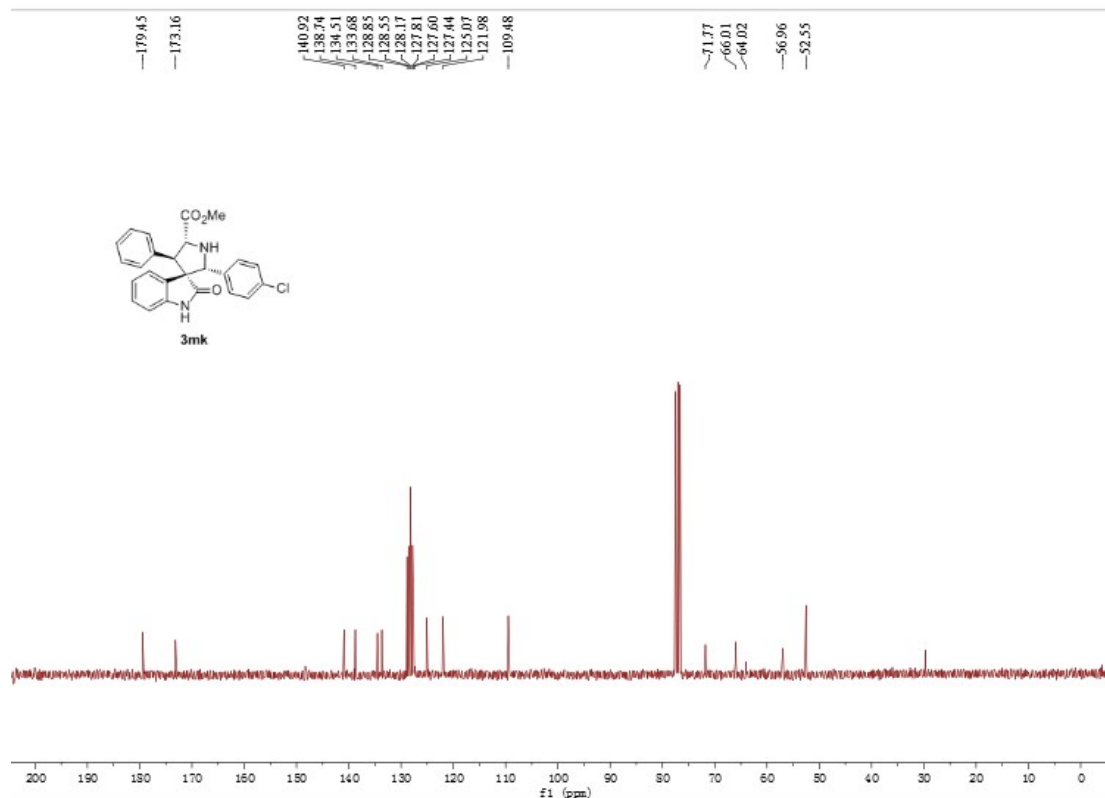

## <sup>1</sup>H NMR of 3nj

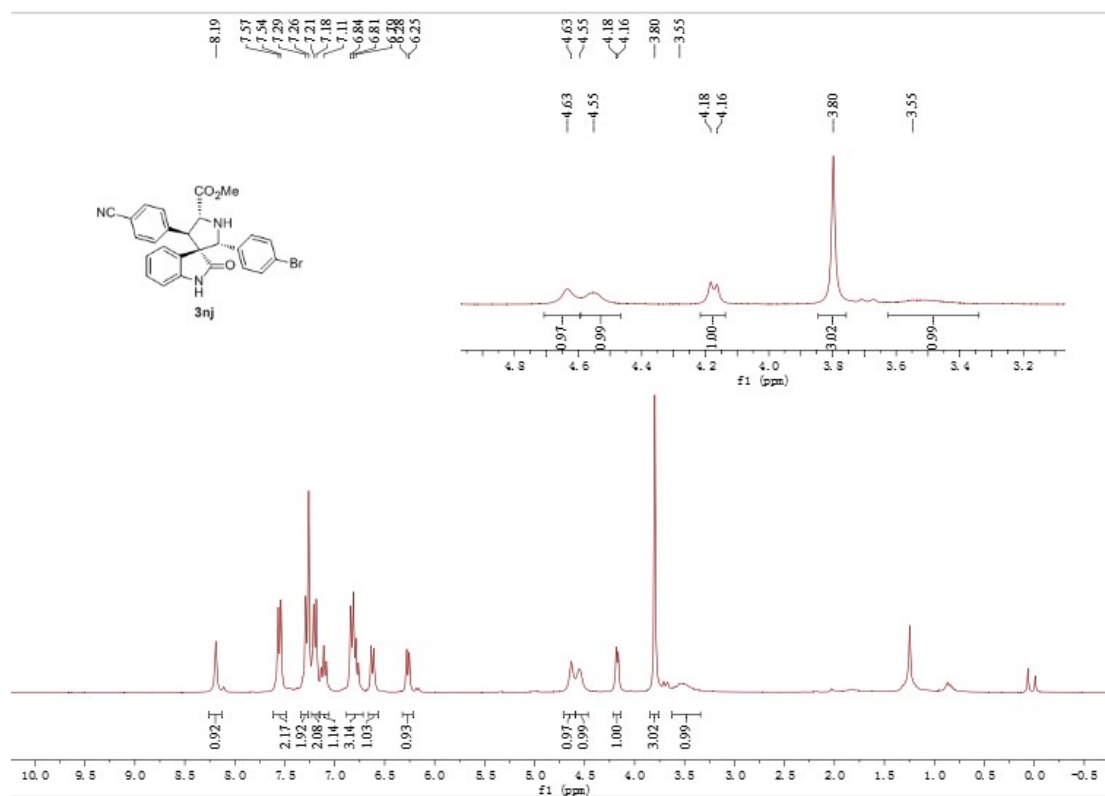

## <sup>13</sup>C NMR of 3nj

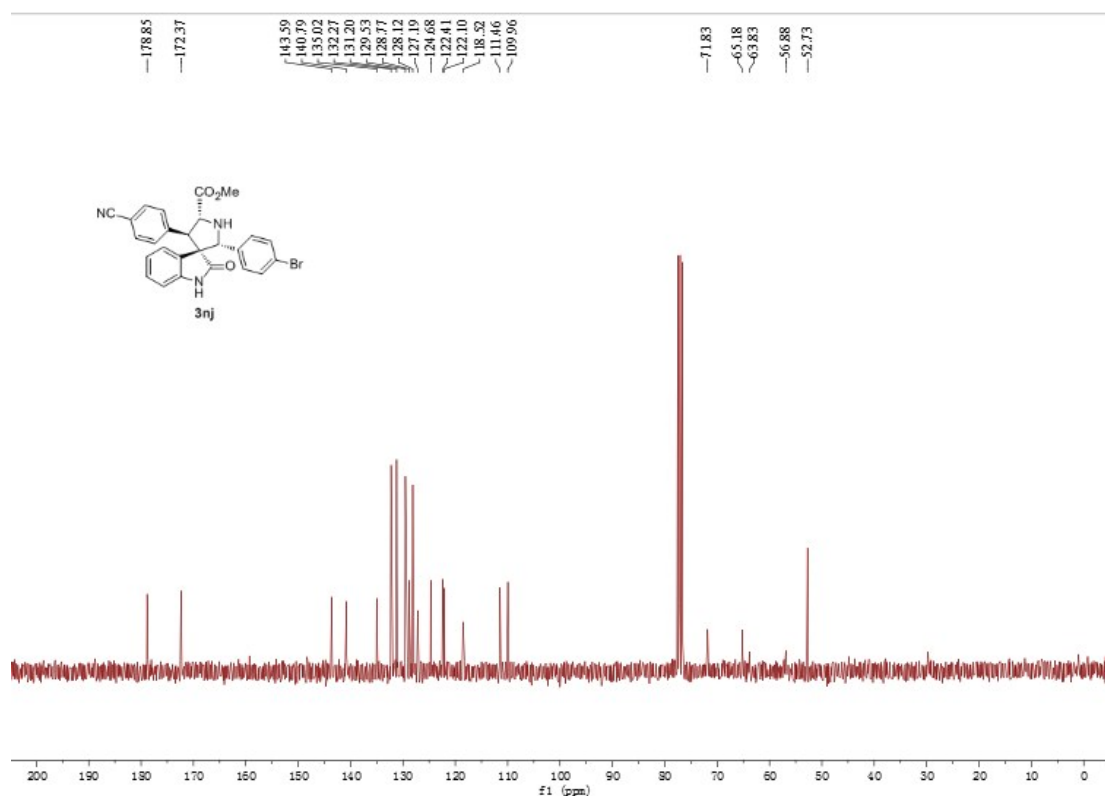

## <sup>1</sup>H NMR of 3oj

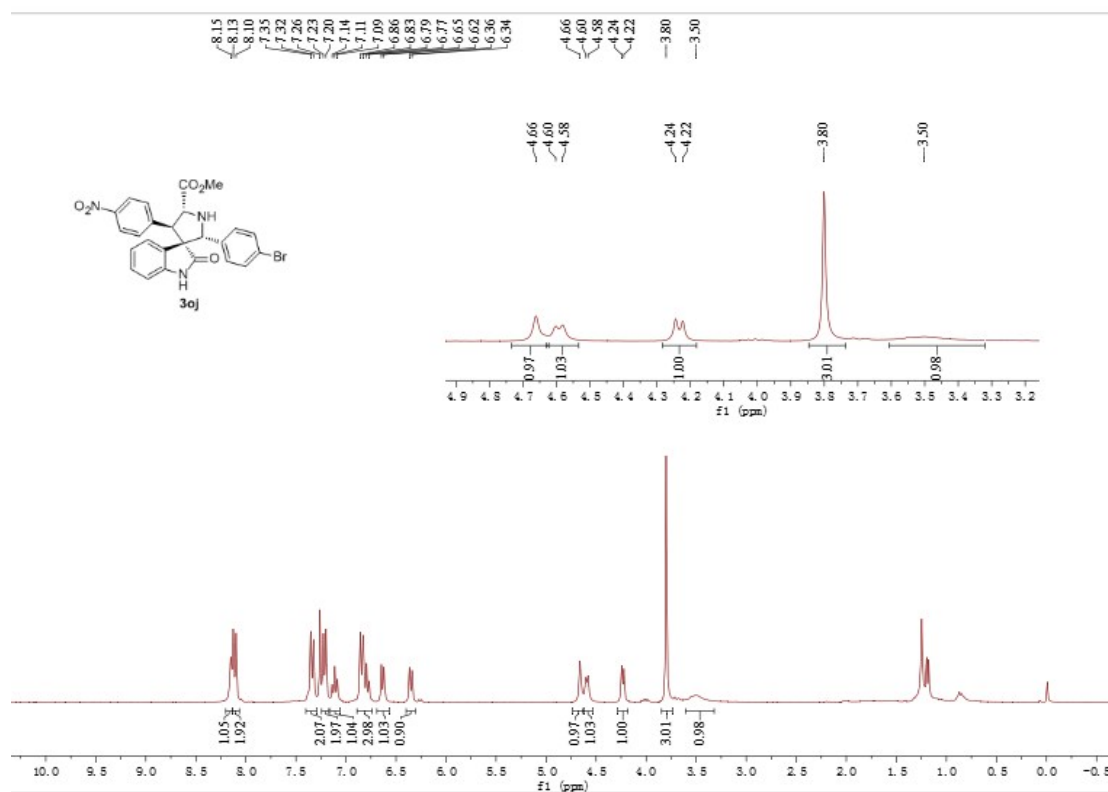

## <sup>13</sup>C NMR of 3oj

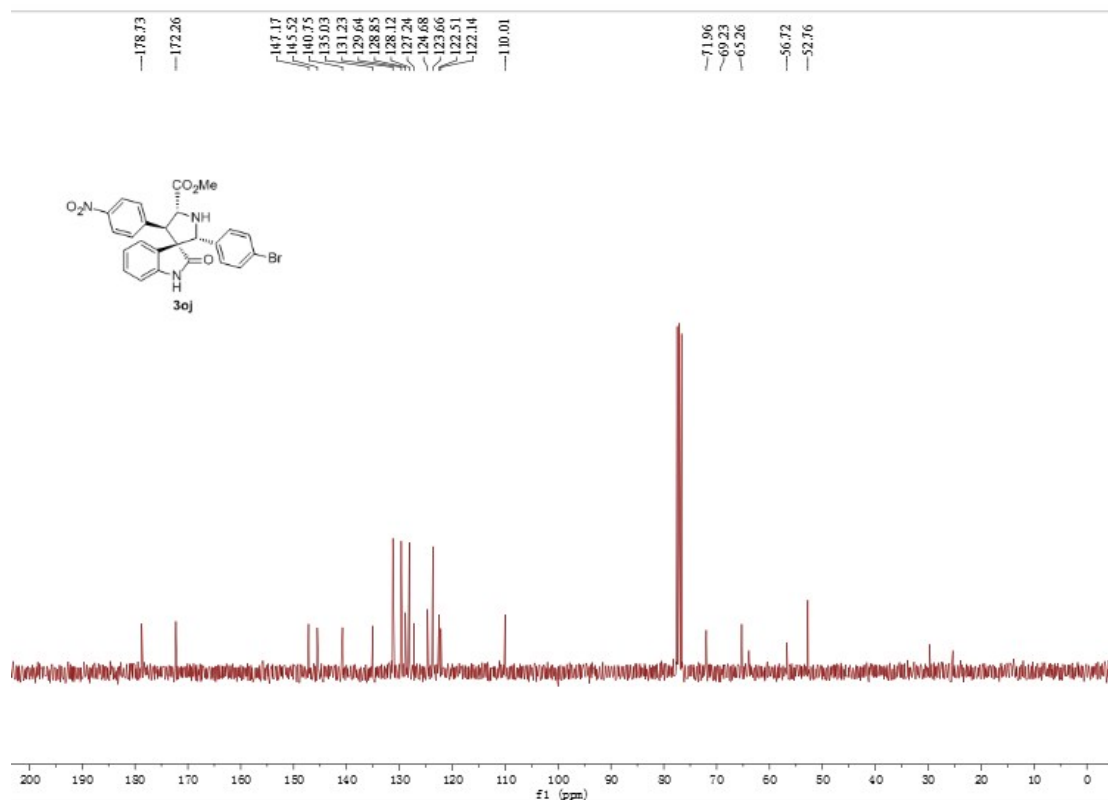

### <sup>1</sup>H NMR of 3pj

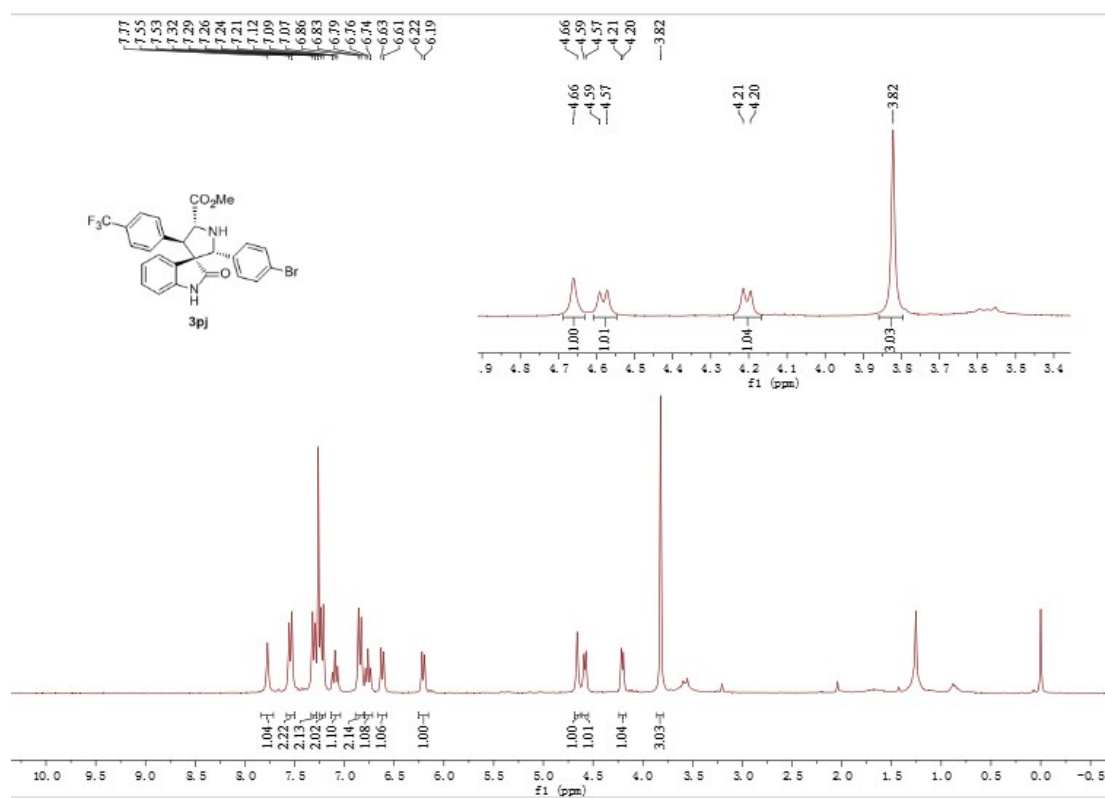

### <sup>13</sup>C NMR of 3pj

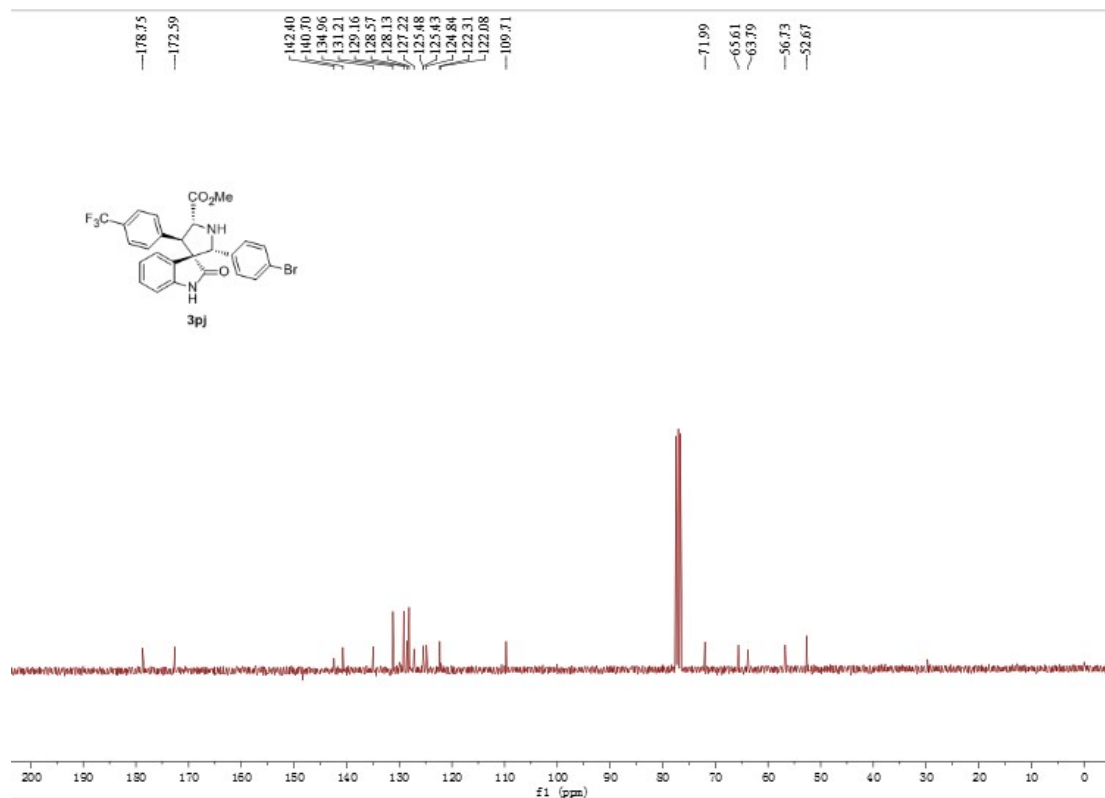



## <sup>1</sup>H NMR of 3mi

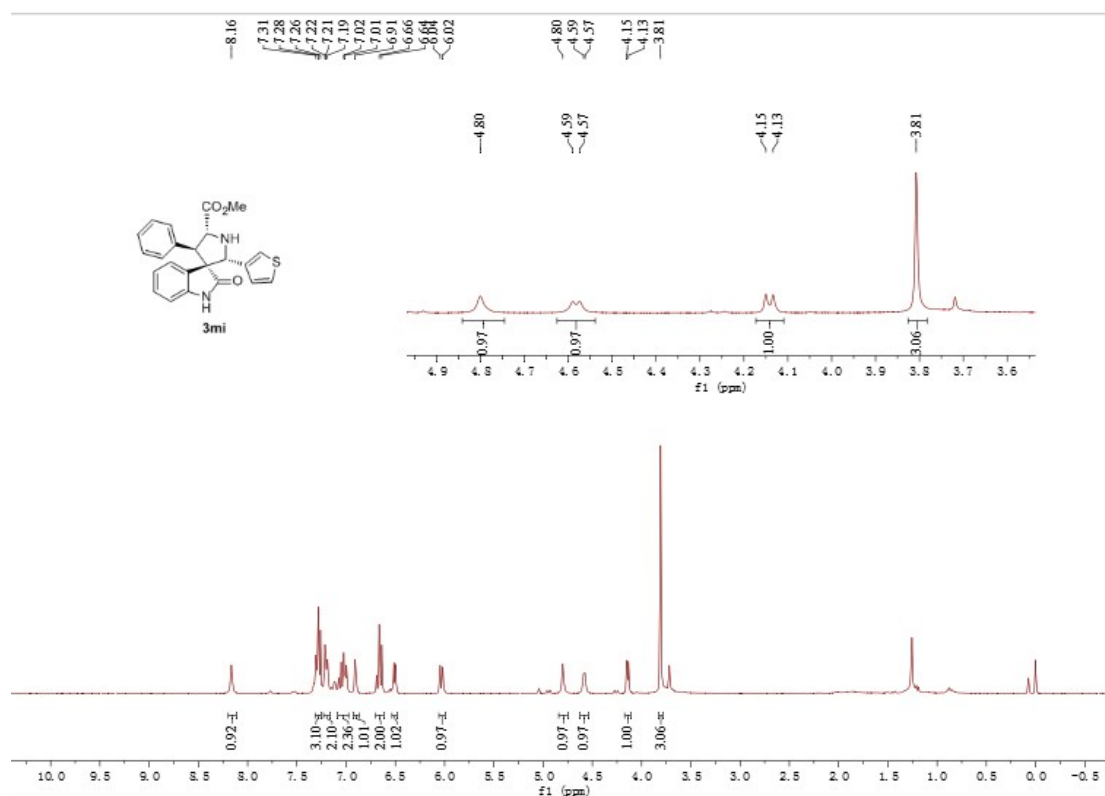

## <sup>13</sup>C NMR of 3mi

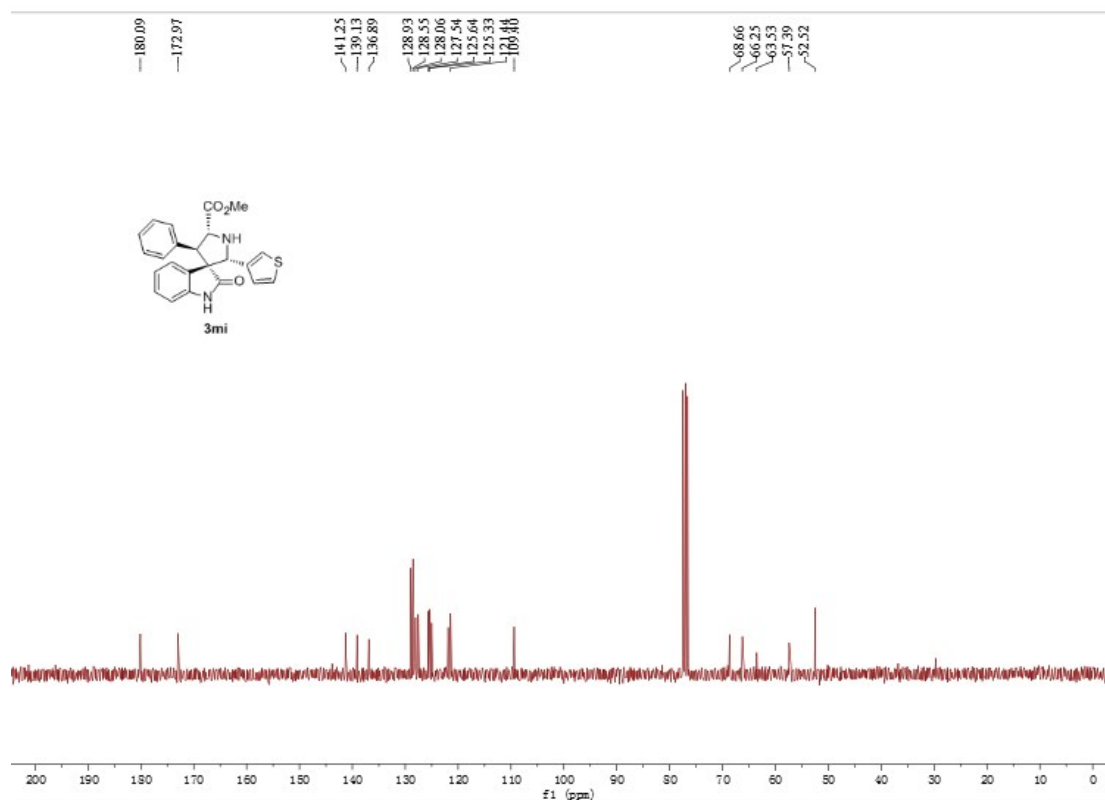

### <sup>1</sup>H NMR of 3mk

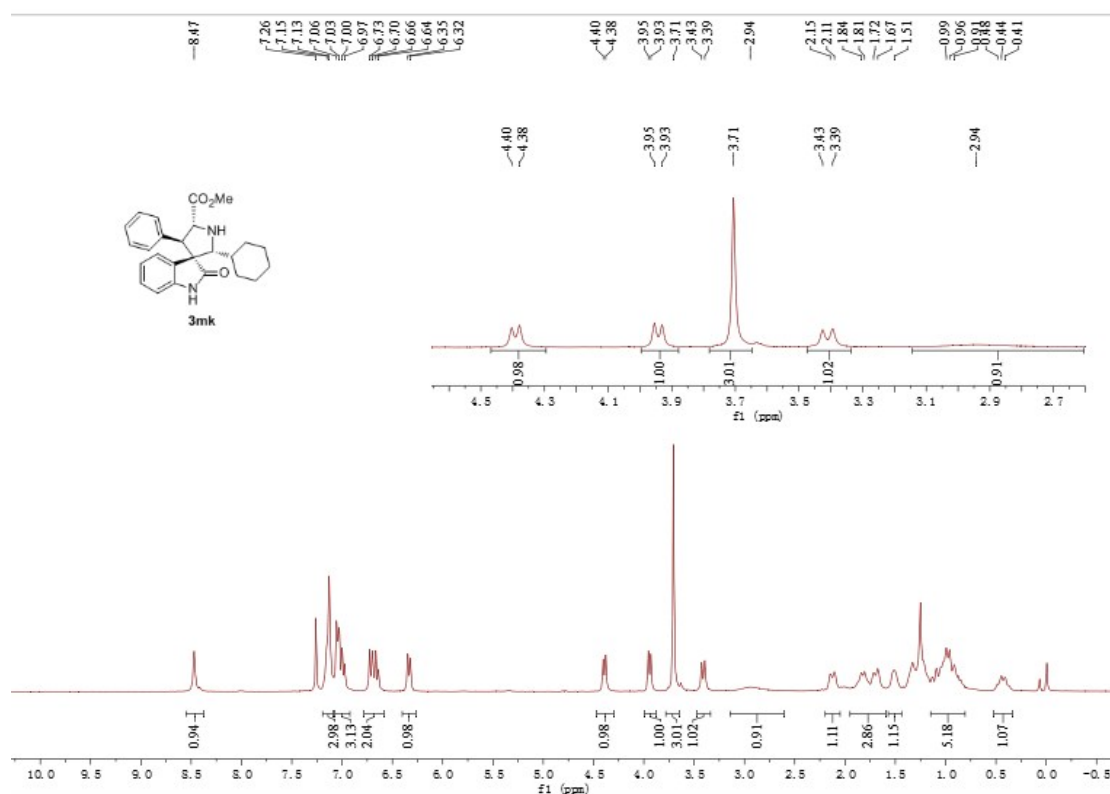

### <sup>13</sup>C NMR of 3mk

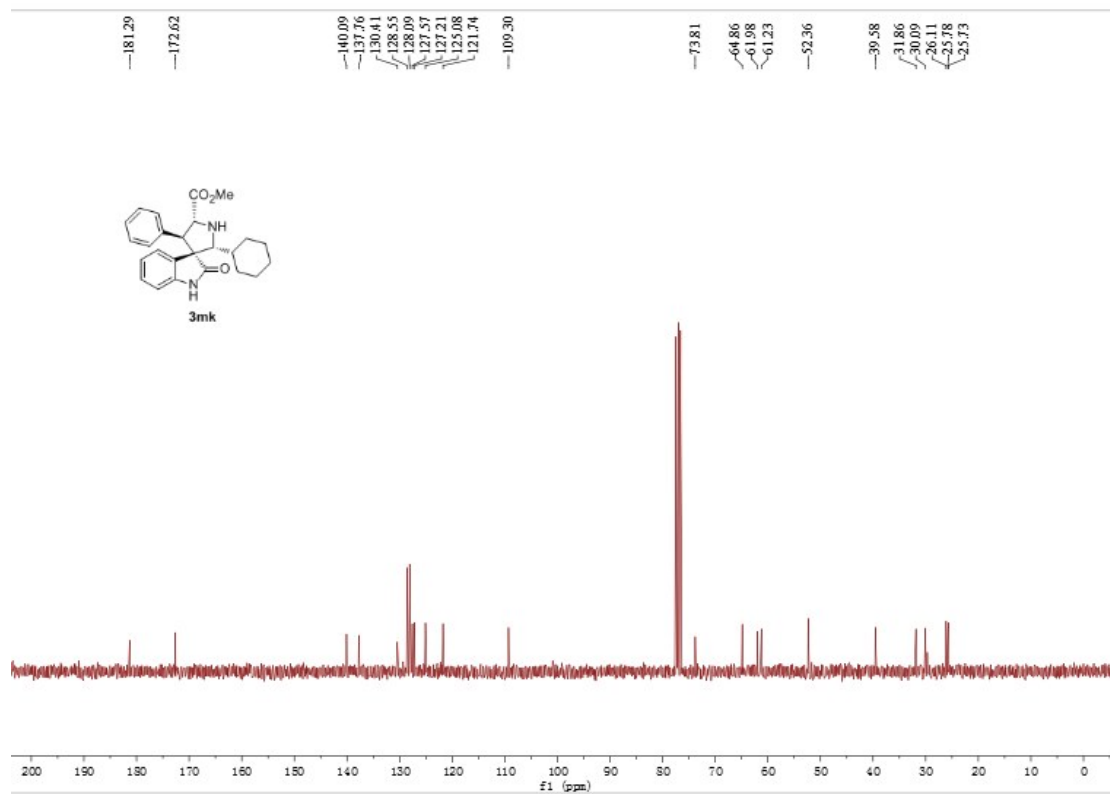



### <sup>1</sup>H NMR of 3ql

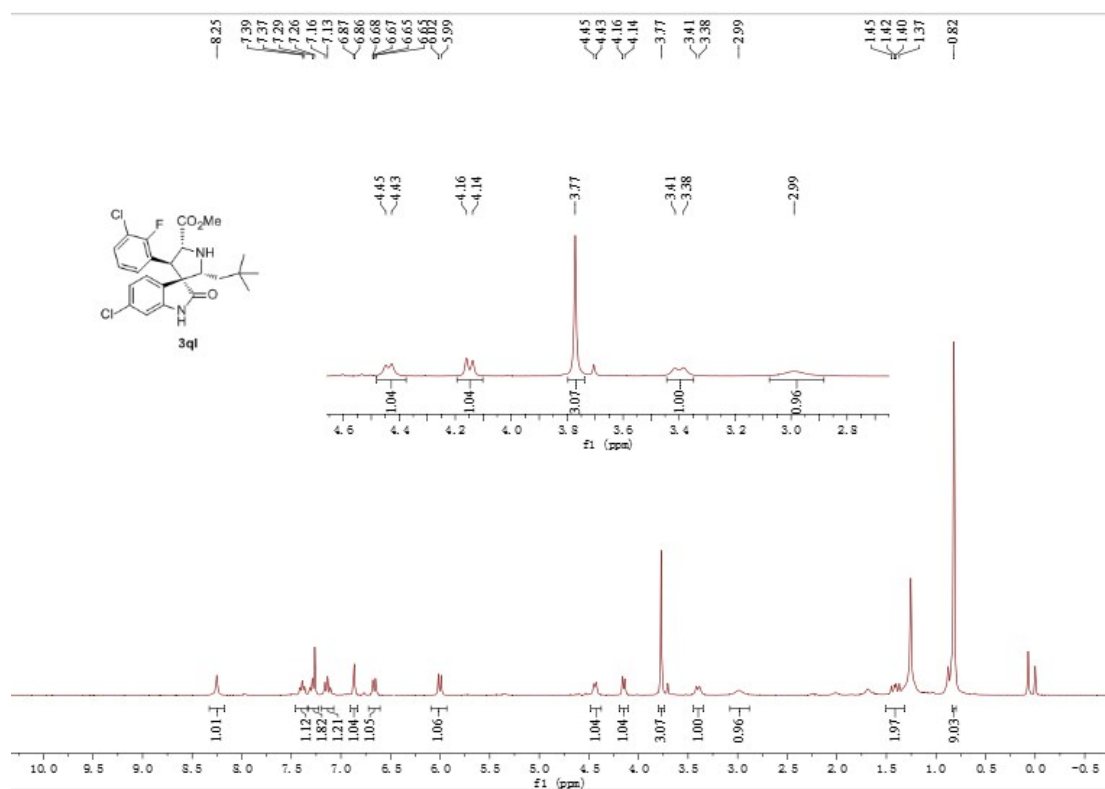

### <sup>13</sup>C NMR of 3ql

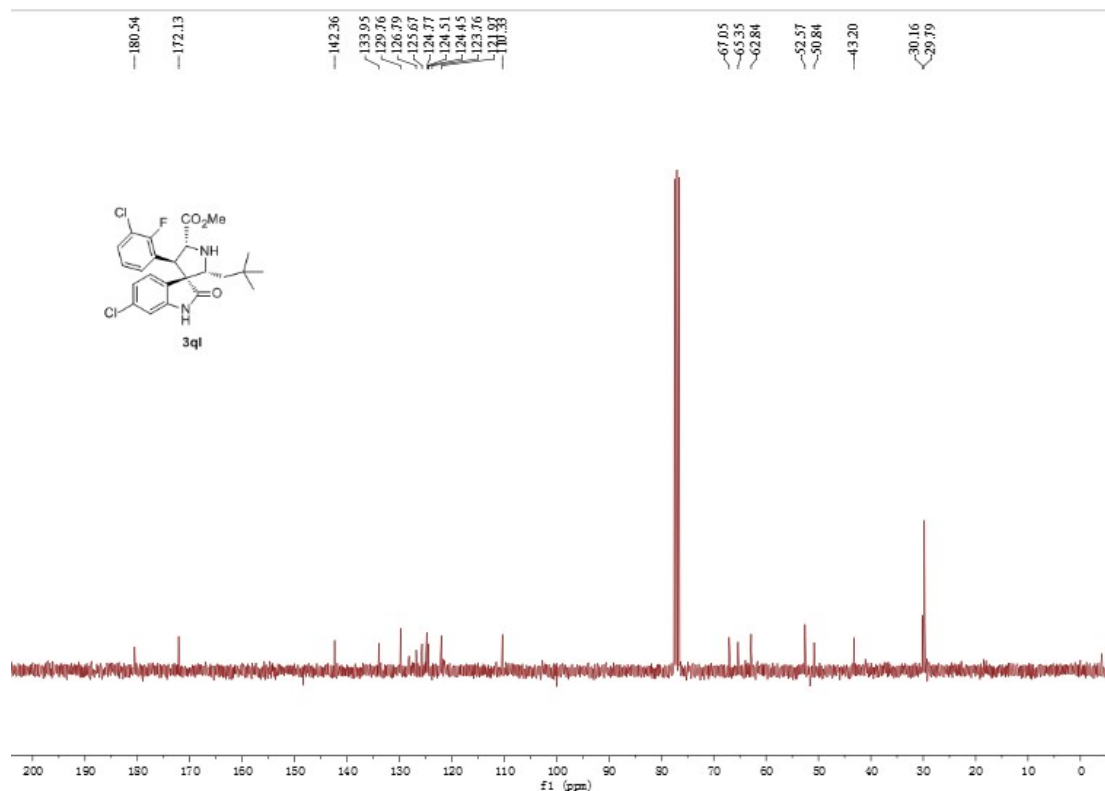

### <sup>1</sup>H NMR of 3ml

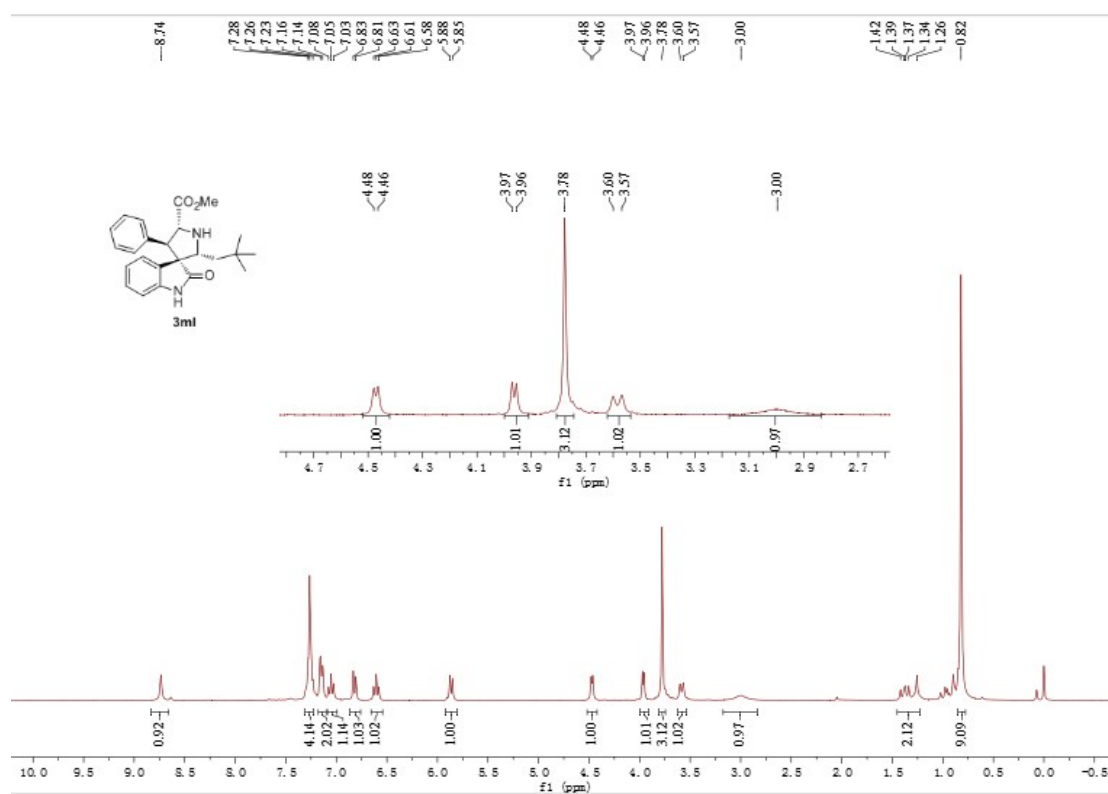

### <sup>13</sup>C NMR of 3ml

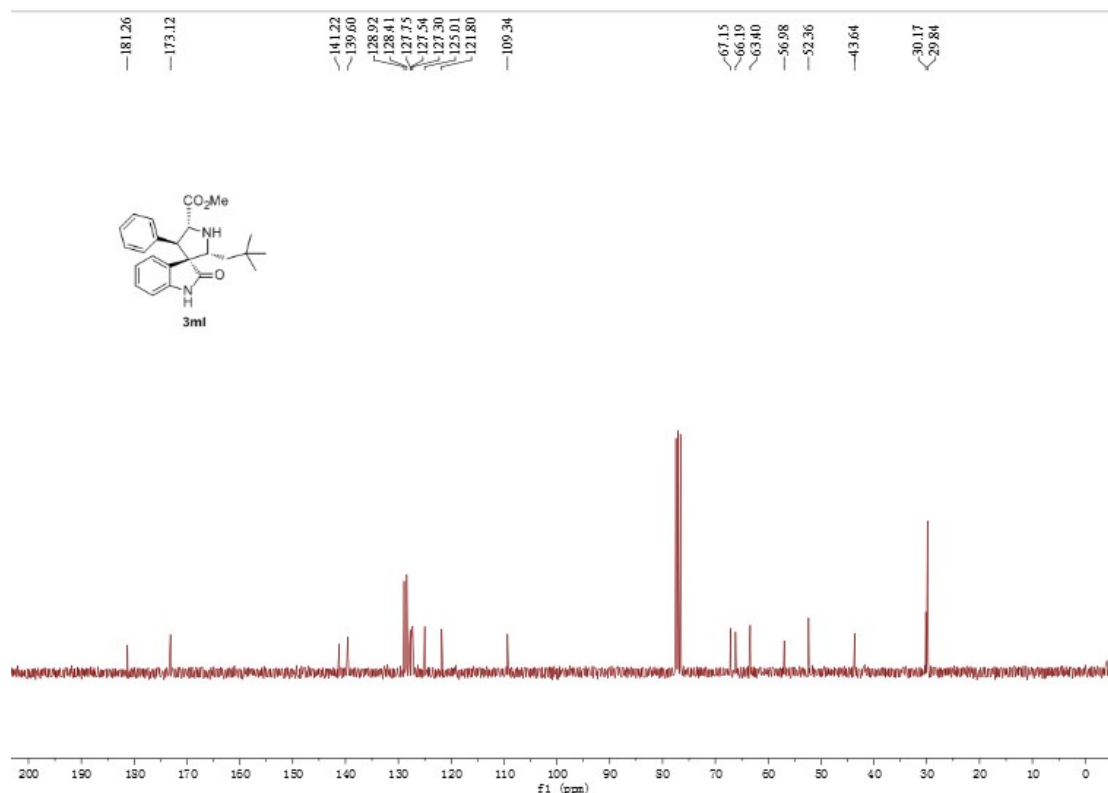

### <sup>1</sup>H NMR of 3mm

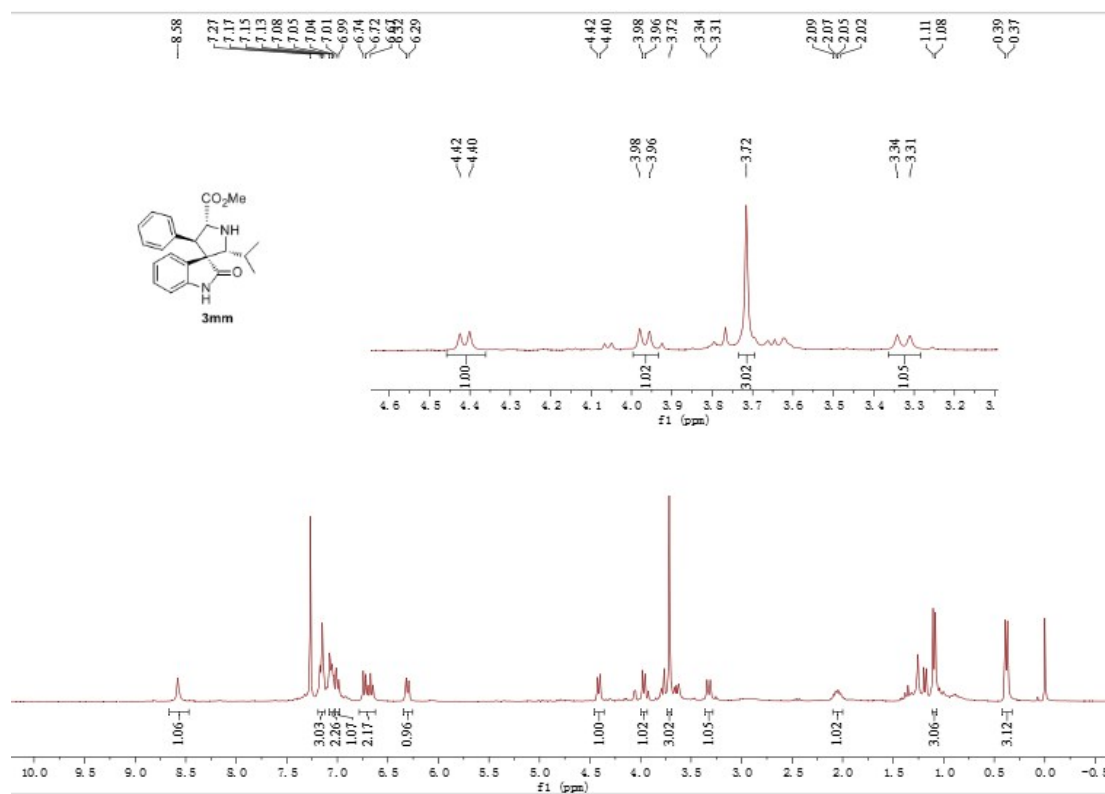

### <sup>13</sup>C NMR of 3mm

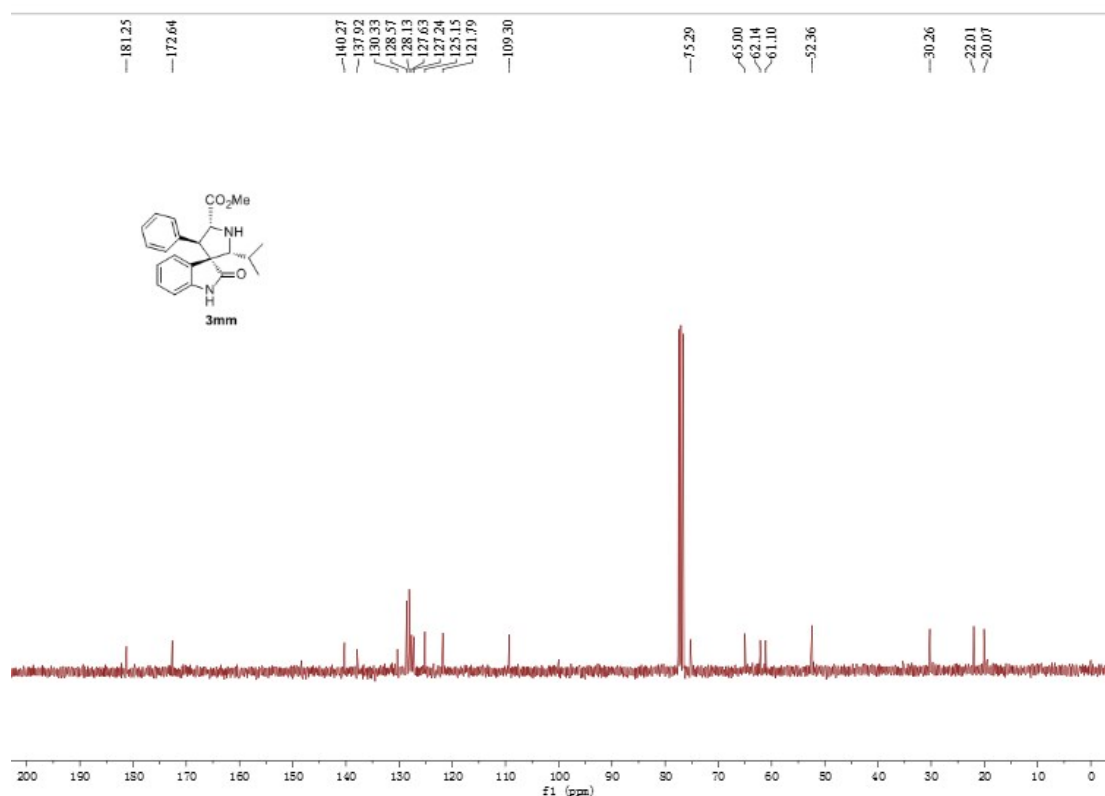

### <sup>1</sup>H NMR of 3ra

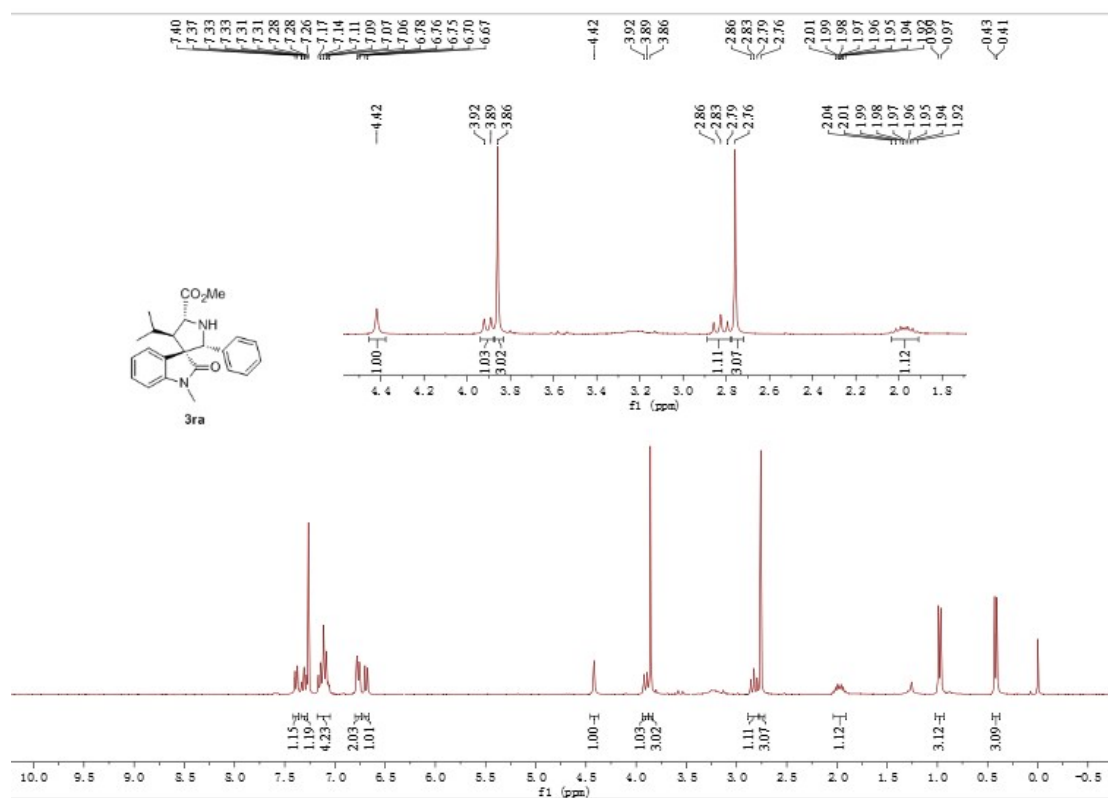

### <sup>13</sup>C NMR of 3ra

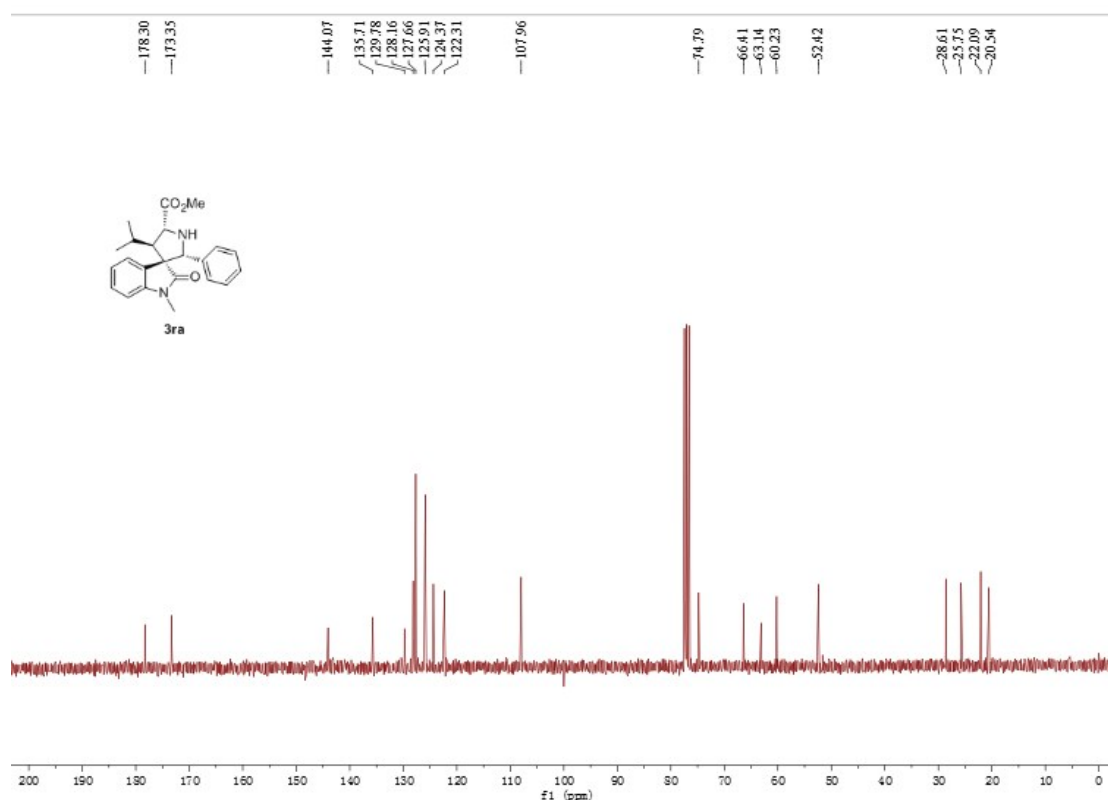



### <sup>1</sup>H NMR of 3ta

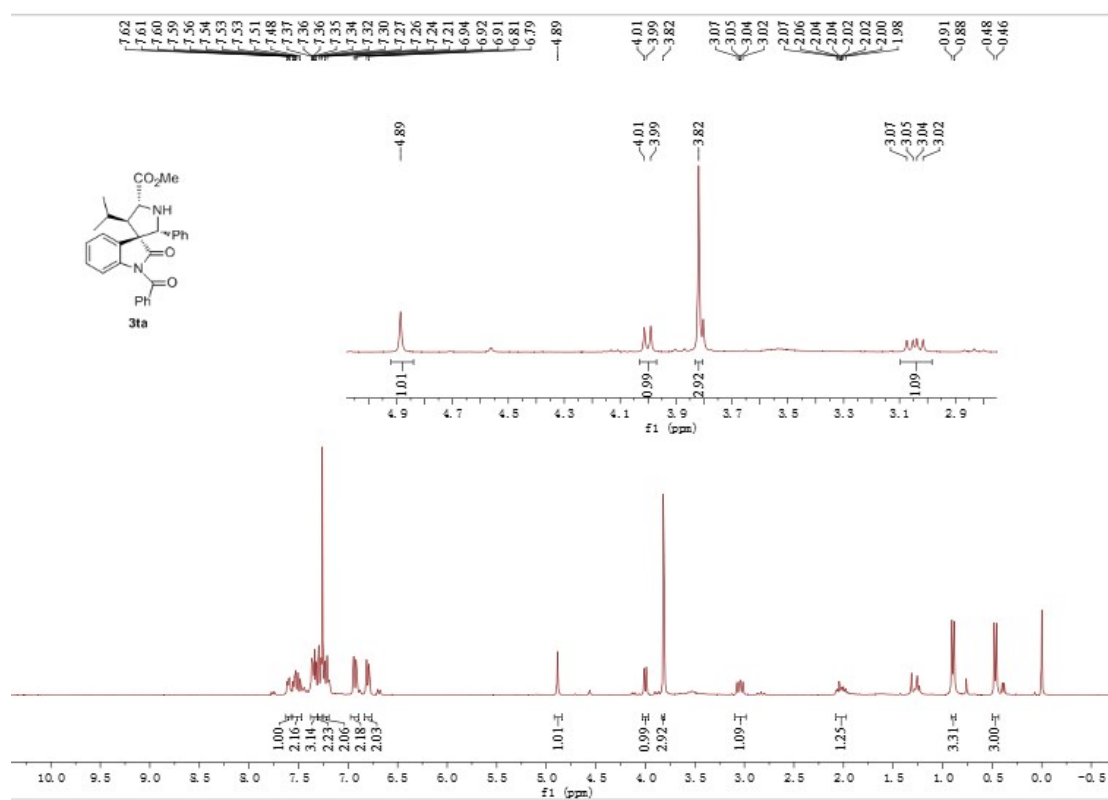

### <sup>13</sup>C NMR of 3ta

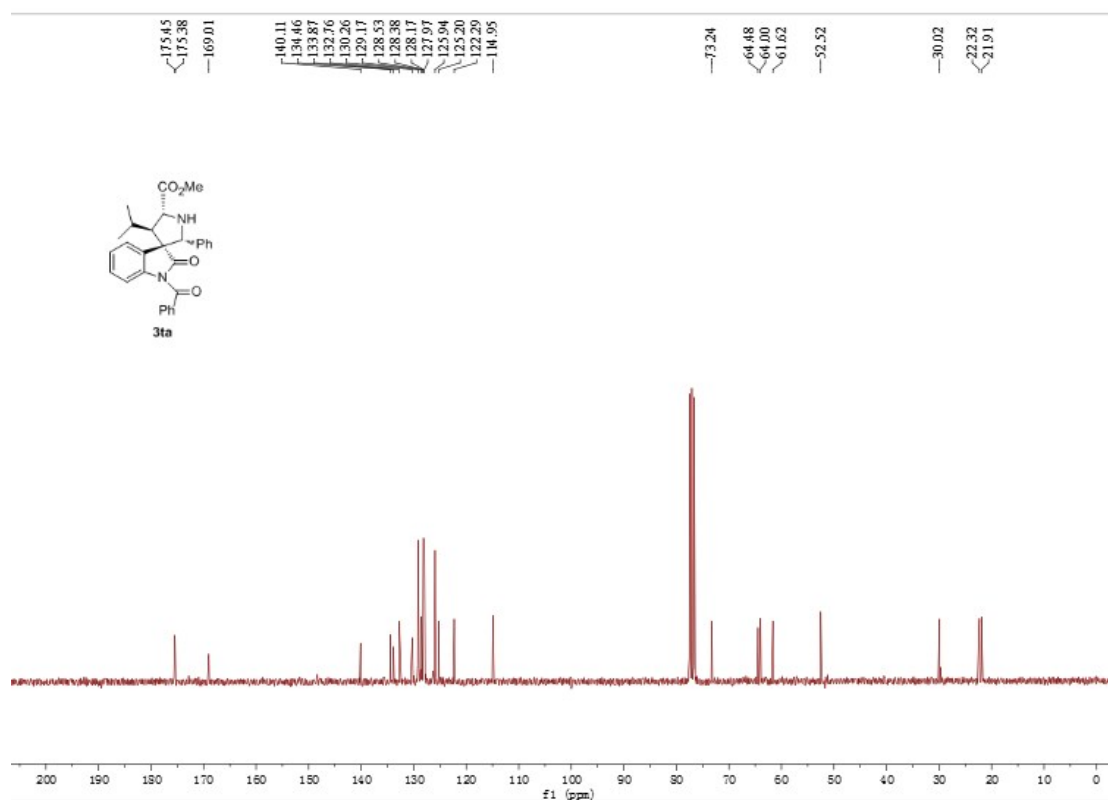

### <sup>1</sup>H NMR of 3ua

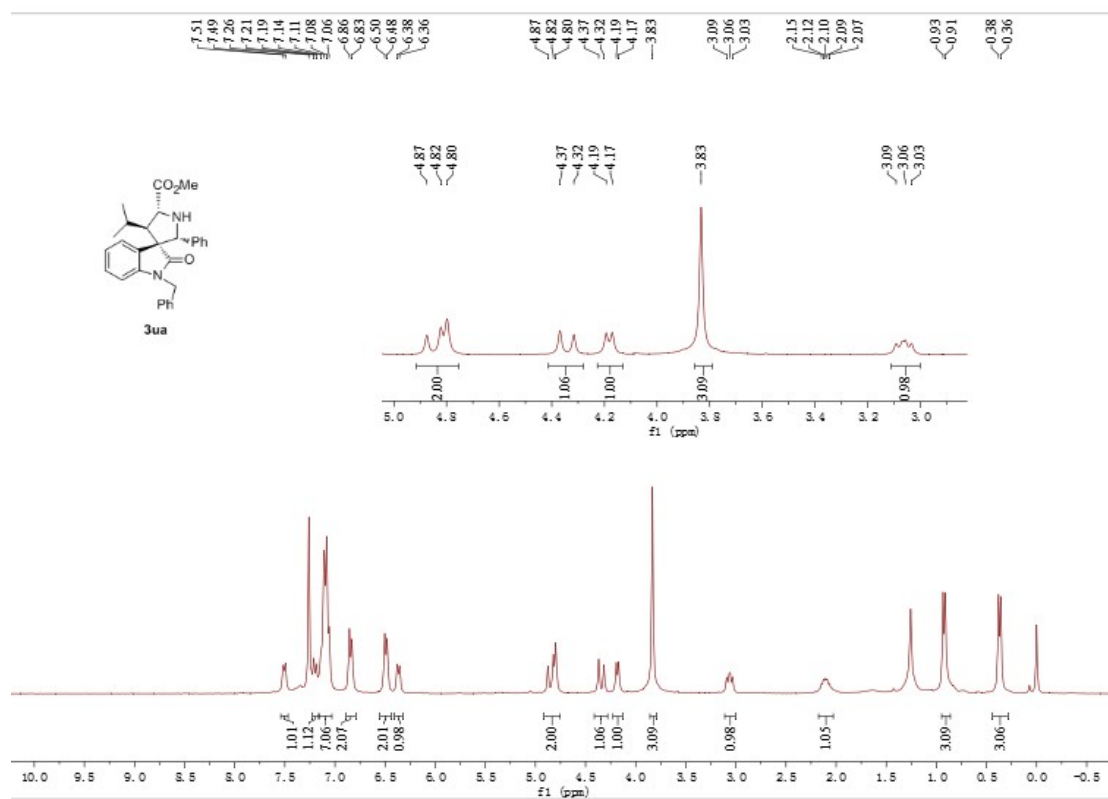

### <sup>13</sup>C NMR of 3ua

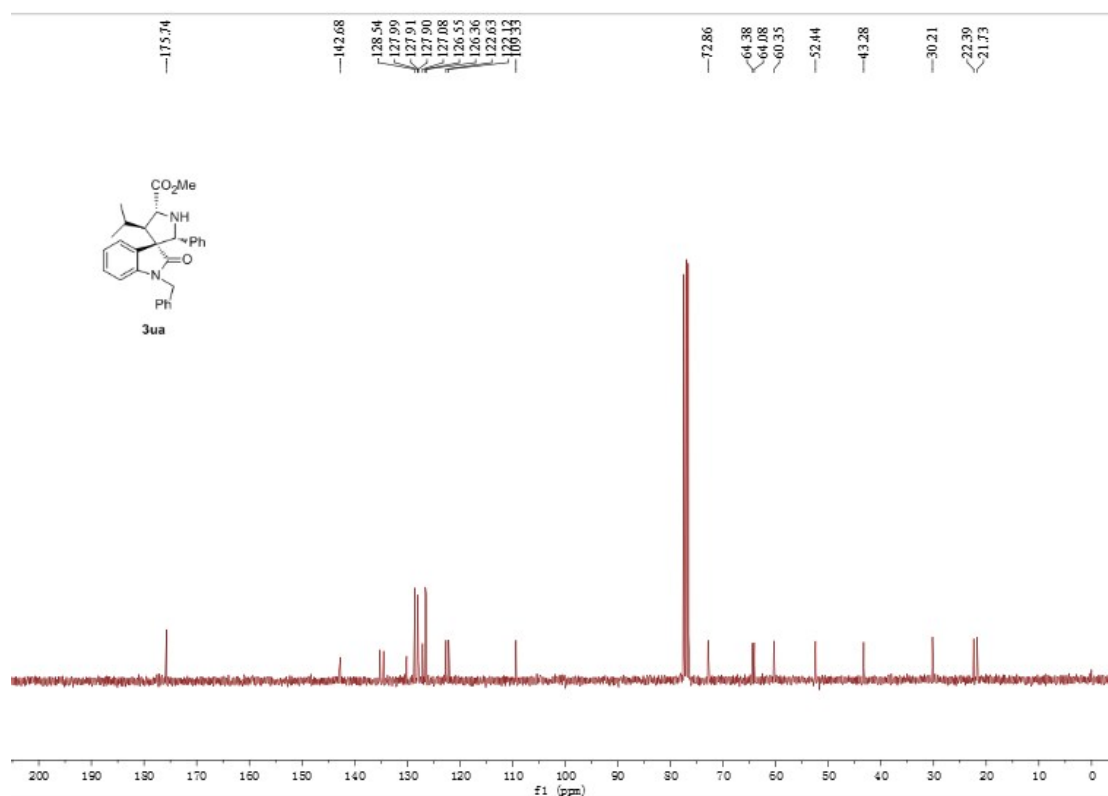

## 8. Copies of HPLC Chromatograms

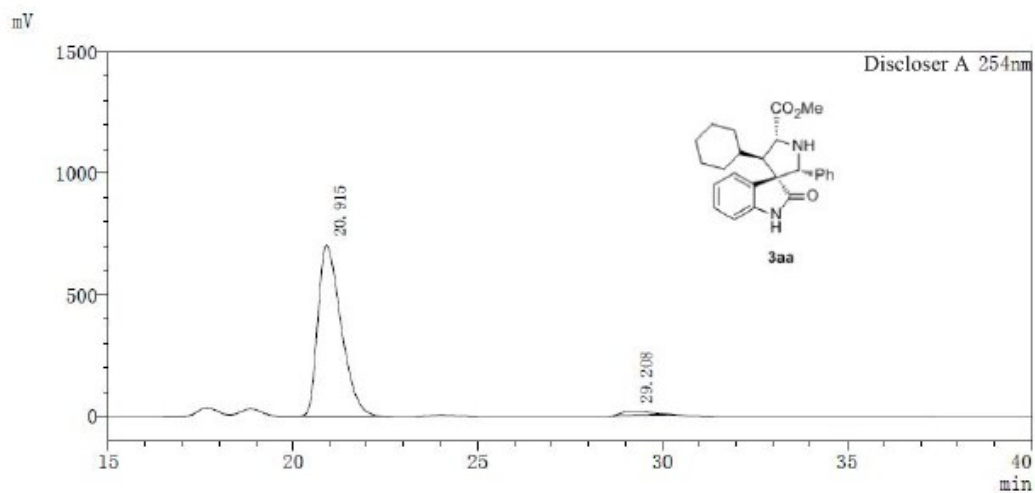

Discloser A 254 nm

| Peak  | Reten time (min) | Area (%) |
|-------|------------------|----------|
| 1     | 20.915           | 97.526   |
| 2     | 29.208           | 2.474    |
| Total |                  | 100.000  |

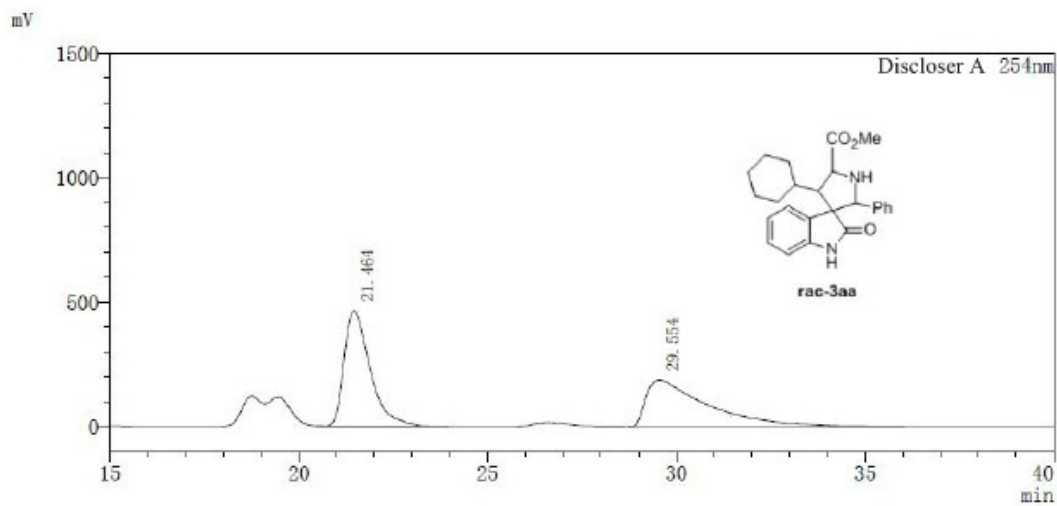

Discloser A 254 nm

| Peak  | Reten time (min) | Area (%) |
|-------|------------------|----------|
| 1     | 21.464           | 51.439   |
| 2     | 29.554           | 48.561   |
| Total |                  | 100.000  |



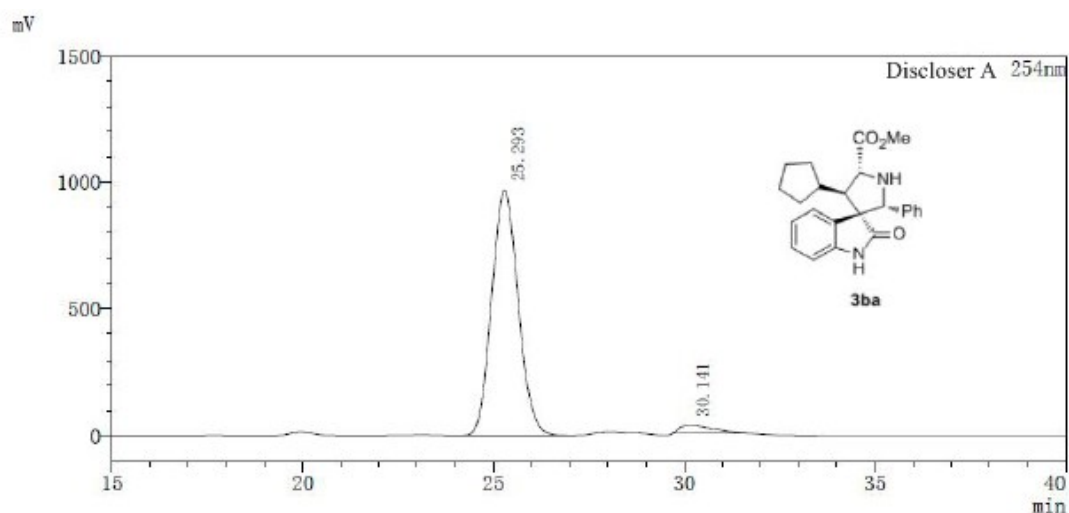

Discloser A 254 nm

| Peak  | Reten time (min) | Area (%) |
|-------|------------------|----------|
| 1     | 25.293           | 96.319   |
| 2     | 30.141           | 3.681    |
| Total |                  | 100.000  |

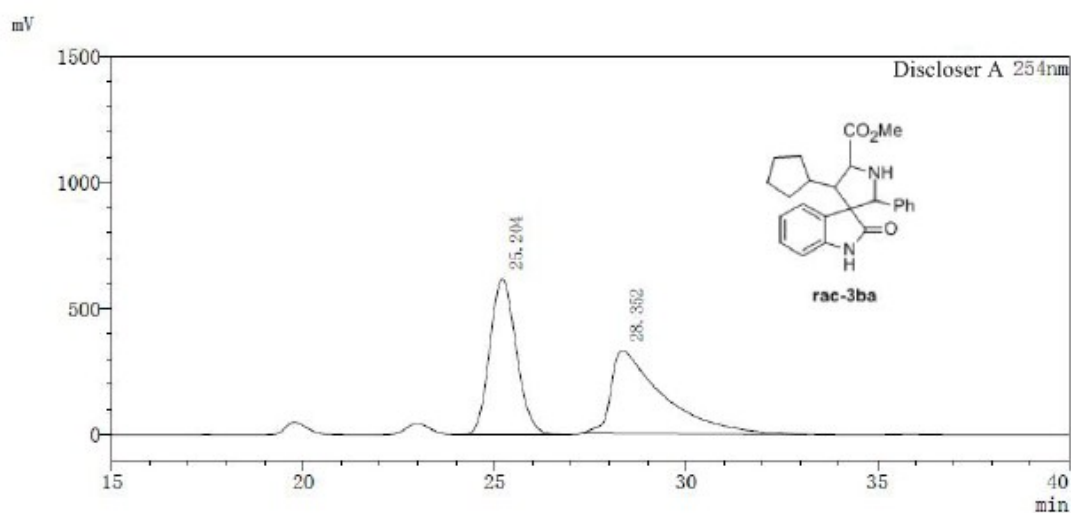

Discloser A 254 nm

| Peak  | Reten time (min) | Area (%) |
|-------|------------------|----------|
| 1     | 25.204           | 49.163   |
| 2     | 28.352           | 50.837   |
| Total |                  | 100.000  |

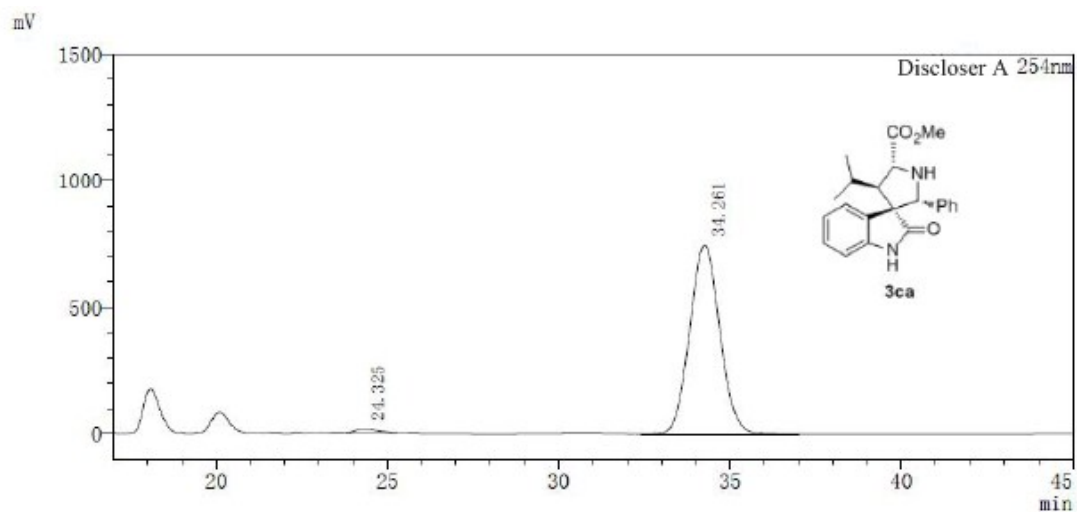

Discloser A 254 nm

| Peak  | Reten time (min) | Area (%) |
|-------|------------------|----------|
| 1     | 24.325           | 1.481    |
| 2     | 34.261           | 98.519   |
| Total |                  | 100.000  |

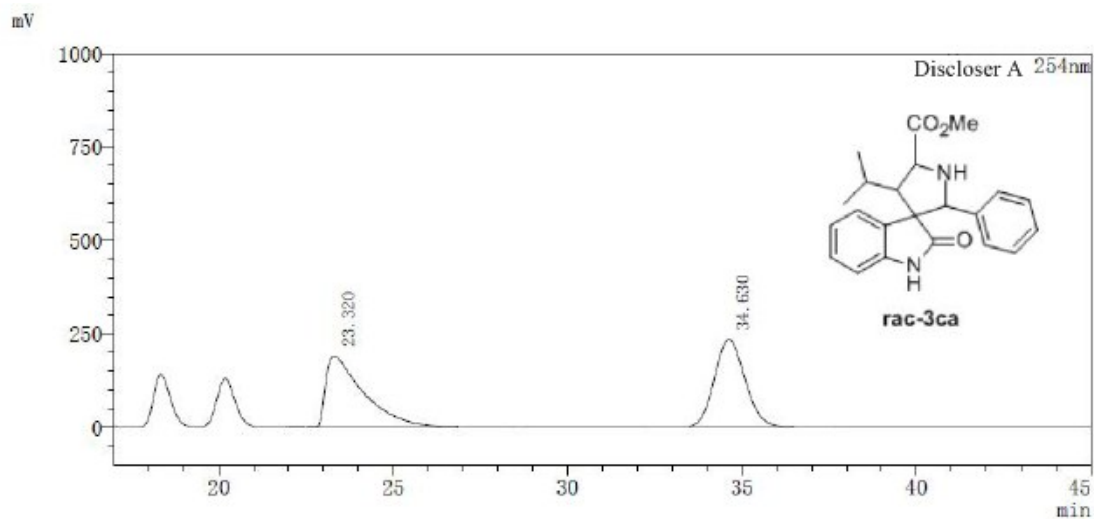

Discloser A 254 nm

| Peak  | Reten time (min) | Area (%) |
|-------|------------------|----------|
| 1     | 23.320           | 50.326   |
| 2     | 34.630           | 49.674   |
| Total |                  | 100.000  |

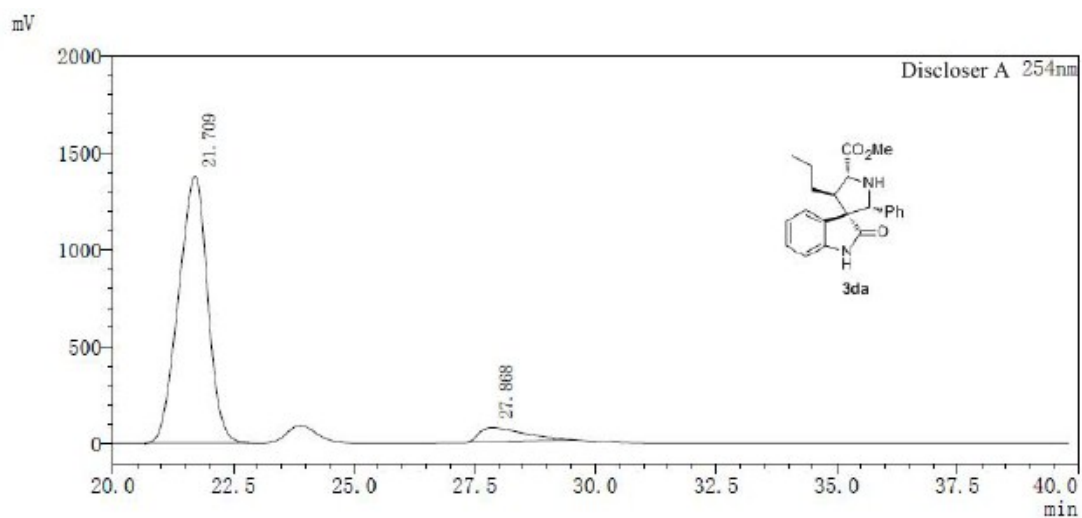

Discloser A 254 nm

| Peak  | Reten time (min) | Area (%) |
|-------|------------------|----------|
| 1     | 21.709           | 92.410   |
| 2     | 27.868           | 7.590    |
| Total |                  | 100.000  |

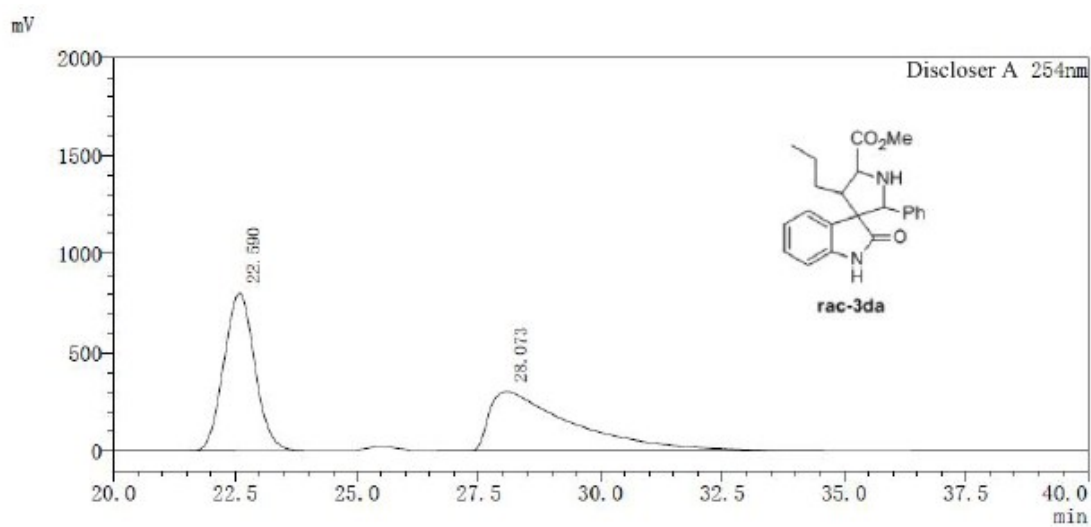

Discloser A 254 nm

| Peak  | Reten time (min) | Area (%) |
|-------|------------------|----------|
| 1     | 22.590           | 49.550   |
| 2     | 28.073           | 50.450   |
| Total |                  | 100.000  |

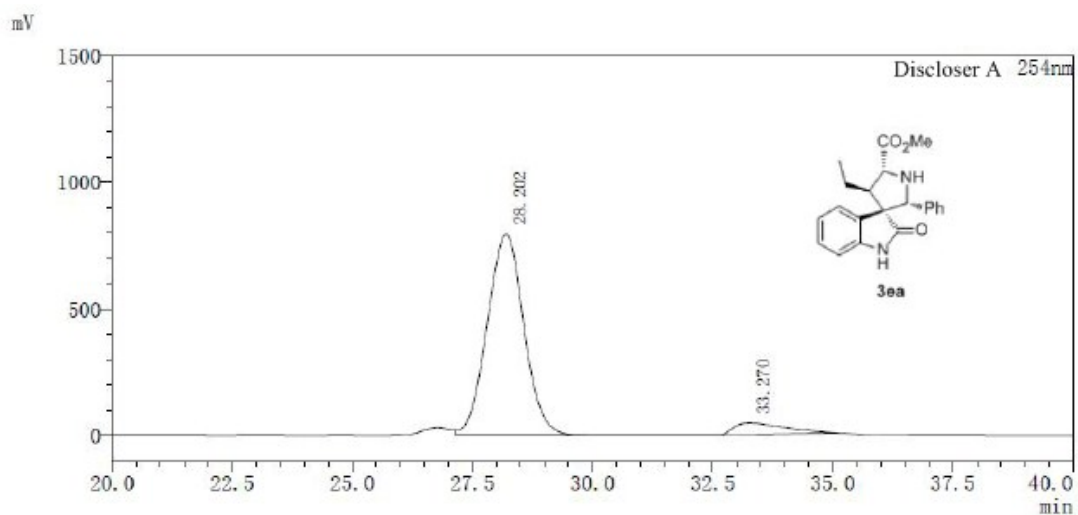

Discloser A 254 nm

| Peak  | Reten time (min) | Area (%) |
|-------|------------------|----------|
| 1     | 28.202           | 92.677   |
| 2     | 33.270           | 7.323    |
| Total |                  | 100.000  |

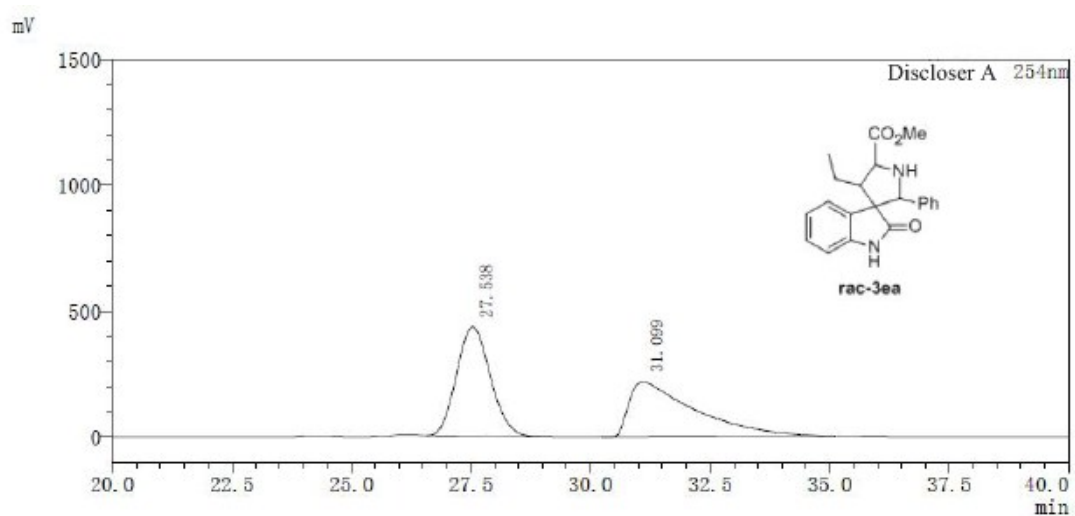

Discloser A 254 nm

| Peak  | Reten time (min) | Area (%) |
|-------|------------------|----------|
| 1     | 27.538           | 50.313   |
| 2     | 31.099           | 49.687   |
| Total |                  | 100.000  |

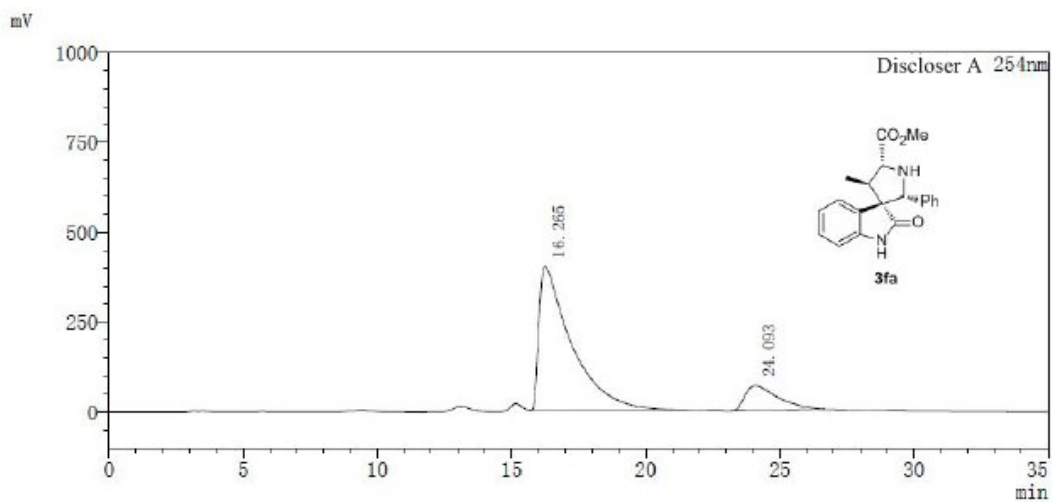

Discloser A 254 nm

| Peak  | Reten time (min) | Area (%) |
|-------|------------------|----------|
| 1     | 16.265           | 85.113   |
| 2     | 24.093           | 14.887   |
| Total |                  | 100.000  |

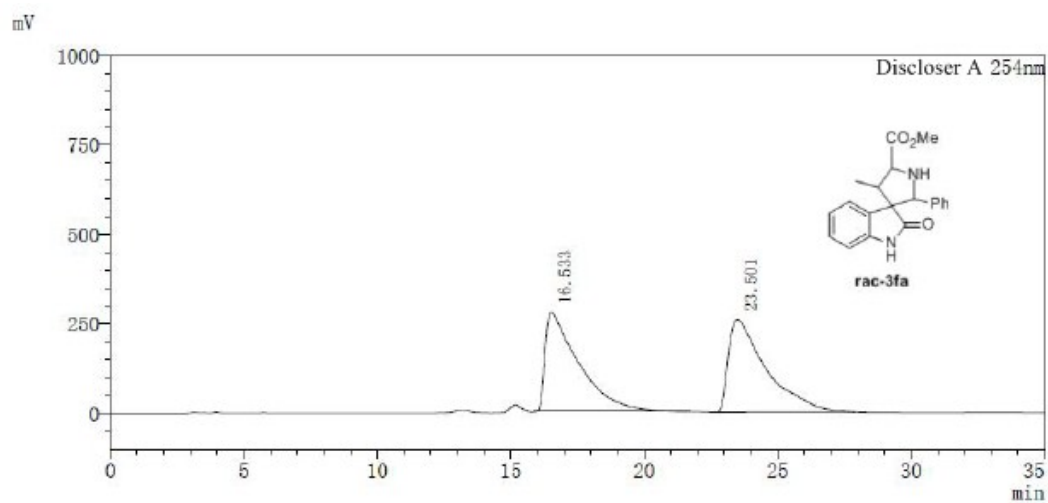

Discloser A 254 nm

| Peak  | Reten time (min) | Area (%) |
|-------|------------------|----------|
| 1     | 16.533           | 49.059   |
| 2     | 23.501           | 50.941   |
| Total |                  | 100.000  |

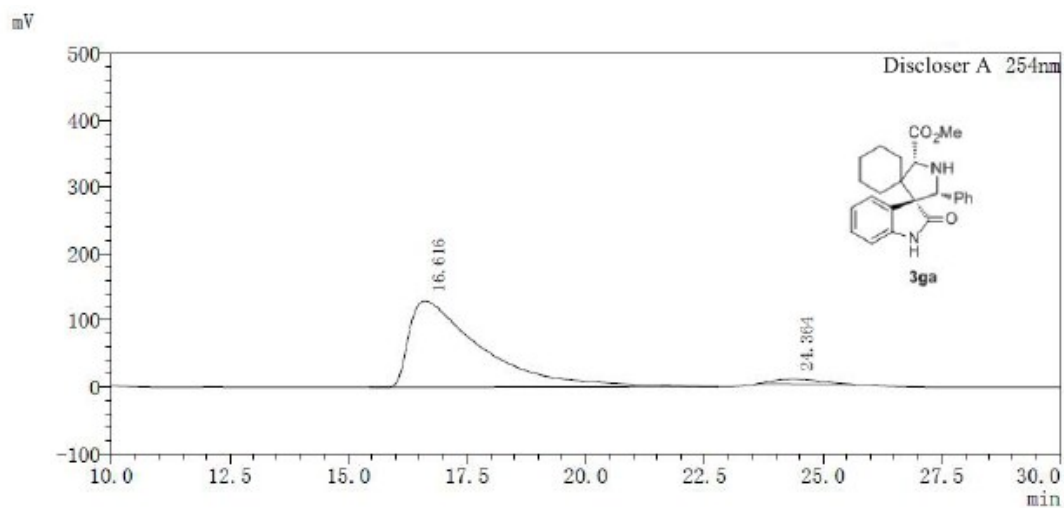

Discloser A 254 nm

| Peak  | Reten time (min) | Area (%) |
|-------|------------------|----------|
| 1     | 16.616           | 96.277   |
| 2     | 24.364           | 3.723    |
| Total |                  | 100.000  |

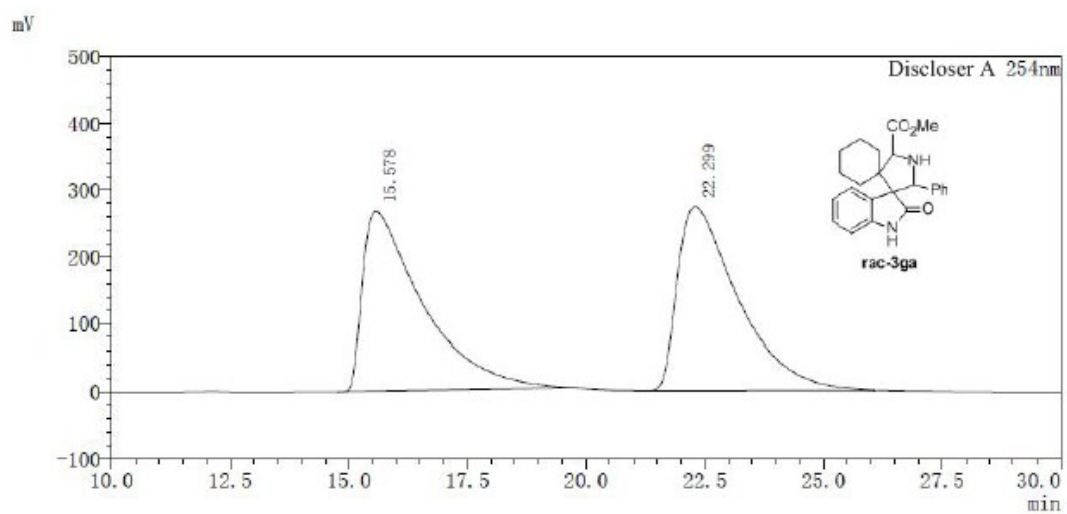

Discloser A 254 nm

| Peak  | Reten time (min) | Area (%) |
|-------|------------------|----------|
| 1     | 15.578           | 49.302   |
| 2     | 22.299           | 50.698   |
| Total |                  | 100.000  |

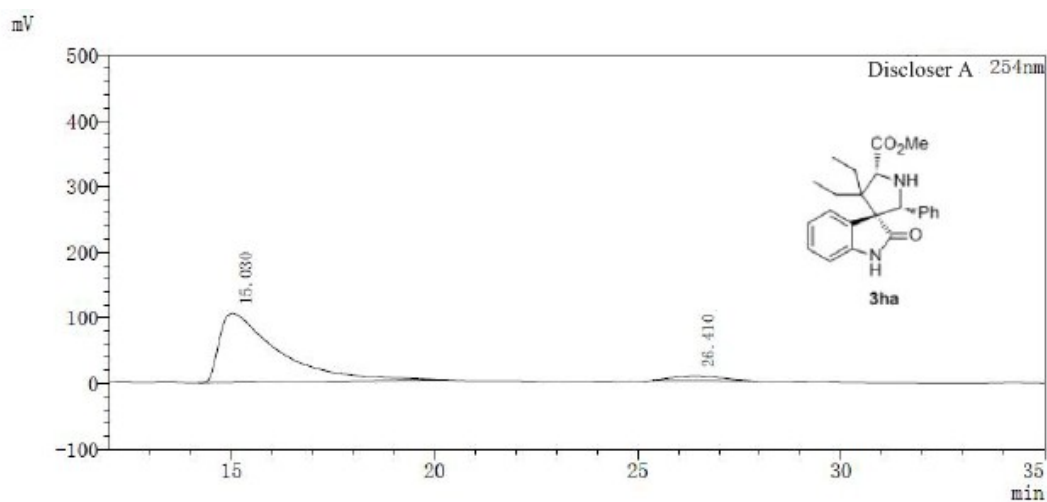

Discloser A 254 nm

| Peak  | Reten time (min) | Area (%) |
|-------|------------------|----------|
| 1     | 15.030           | 95.062   |
| 2     | 26.410           | 4.938    |
| Total |                  | 100.000  |

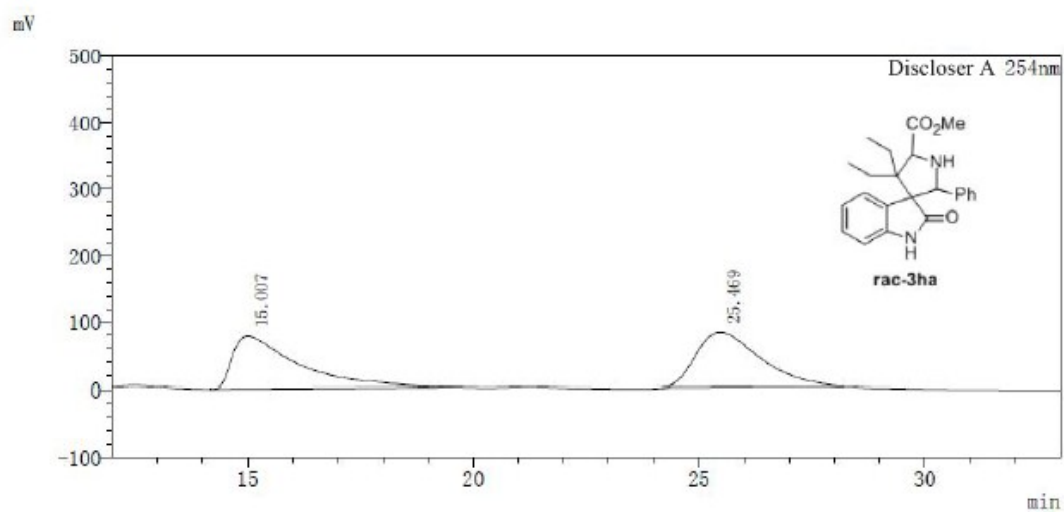

Discloser A 254 nm

| Peak  | Reten time (min) | Area (%) |
|-------|------------------|----------|
| 1     | 15.007           | 49.505   |
| 2     | 25.469           | 50.495   |
| Total |                  | 100.000  |

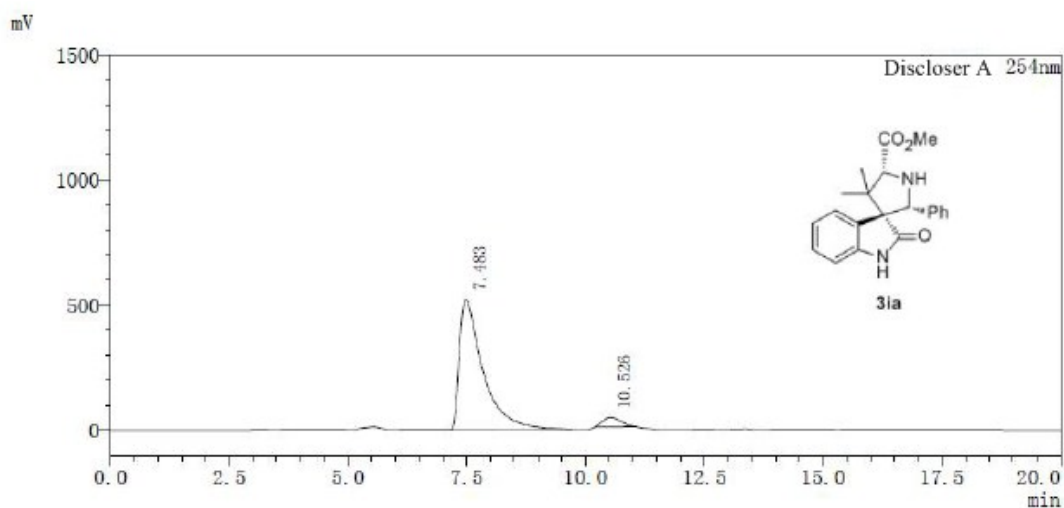

Discloser A 254 nm

| Peak  | Reten time (min) | Area (%) |
|-------|------------------|----------|
| 1     | 7.483            | 94.704   |
| 2     | 10.526           | 5.296    |
| Total |                  | 100.000  |

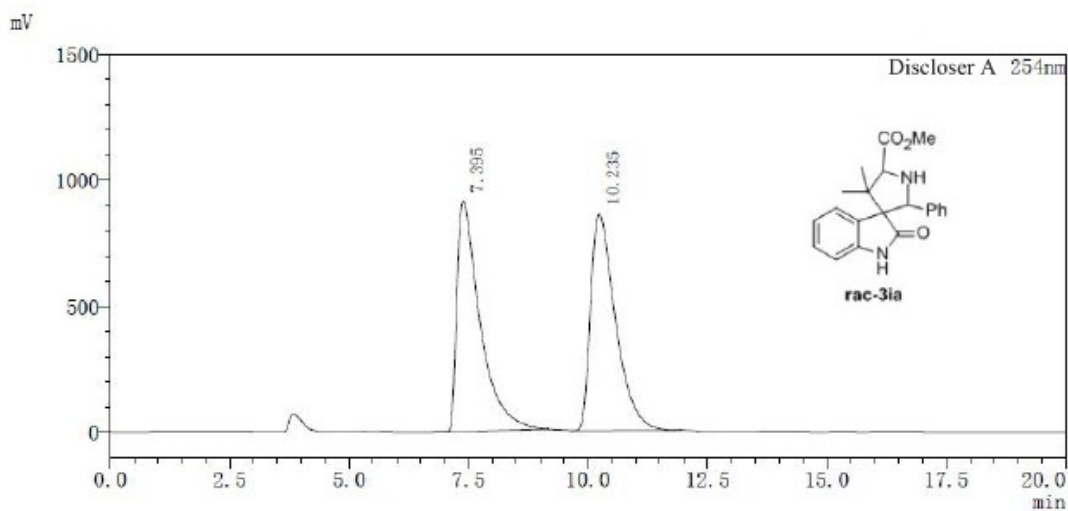

Discloser A 254 nm

| Peak  | Reten time (min) | Area (%) |
|-------|------------------|----------|
| 1     | 7.395            | 49.649   |
| 2     | 10.235           | 50.351   |
| Total |                  | 100.000  |



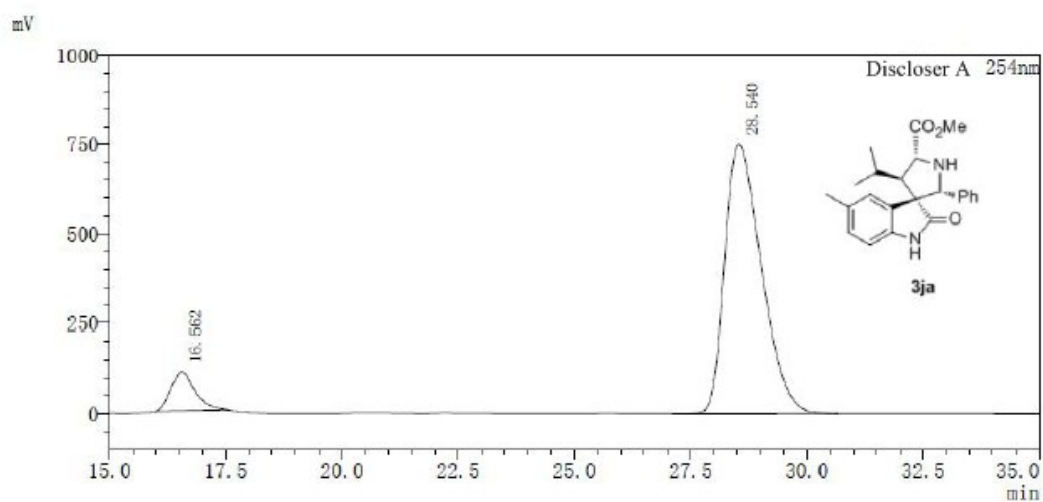

Discloser A 254 nm

| Peak  | Reten time (min) | Area (%) |
|-------|------------------|----------|
| 1     | 16.562           | 8.721    |
| 2     | 28.540           | 91.279   |
| Total |                  | 100.000  |

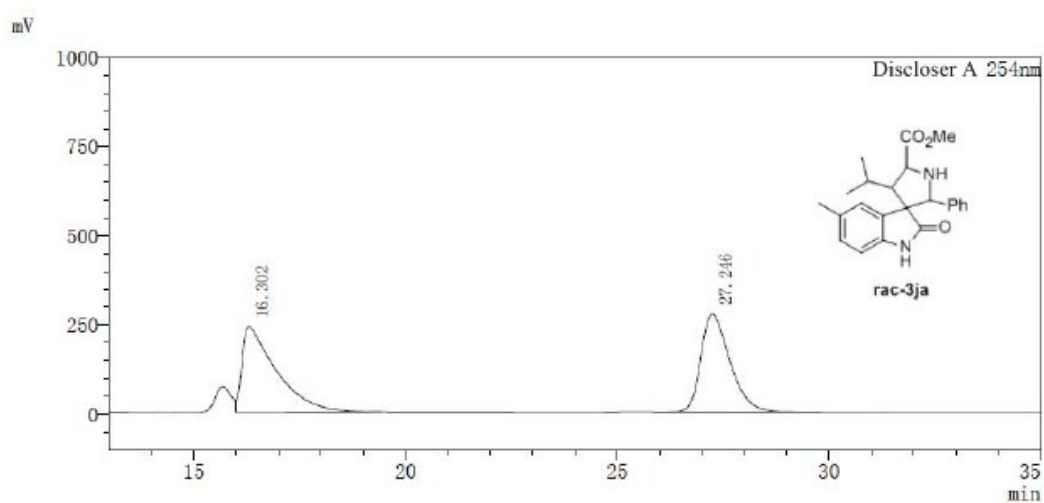

Discloser A 254 nm

| Peak  | Reten time (min) | Area (%) |
|-------|------------------|----------|
| 1     | 16.302           | 50.824   |
| 2     | 27.246           | 49.176   |
| Total |                  | 100.000  |

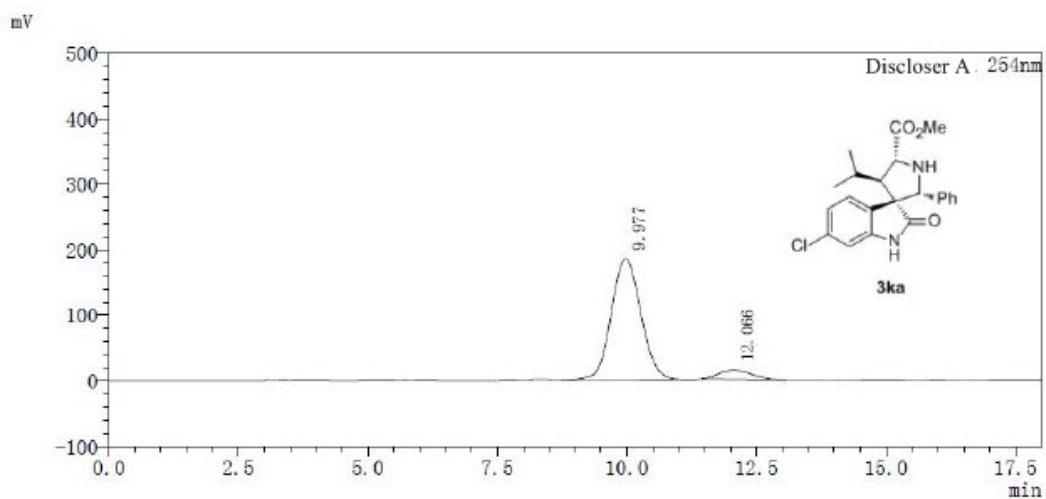

Discloser A 254 nm

| Peak  | Reten time (min) | Area (%) |
|-------|------------------|----------|
| 1     | 9.977            | 92.206   |
| 2     | 12.066           | 7.794    |
| Total |                  | 100.000  |

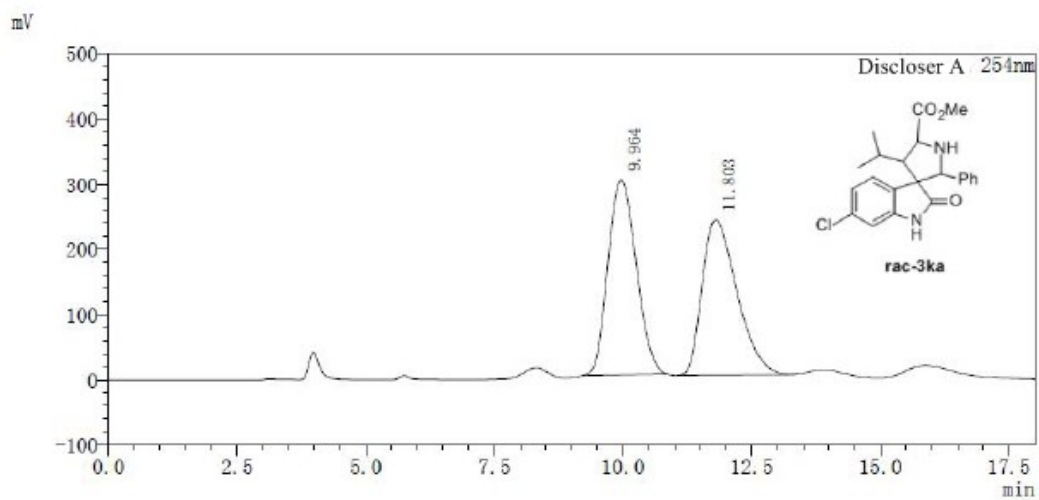

Discloser A 254 nm

| Peak  | Reten time (min) | Area (%) |
|-------|------------------|----------|
| 1     | 9.964            | 50.456   |
| 2     | 11.803           | 49.544   |
| Total |                  | 100.000  |

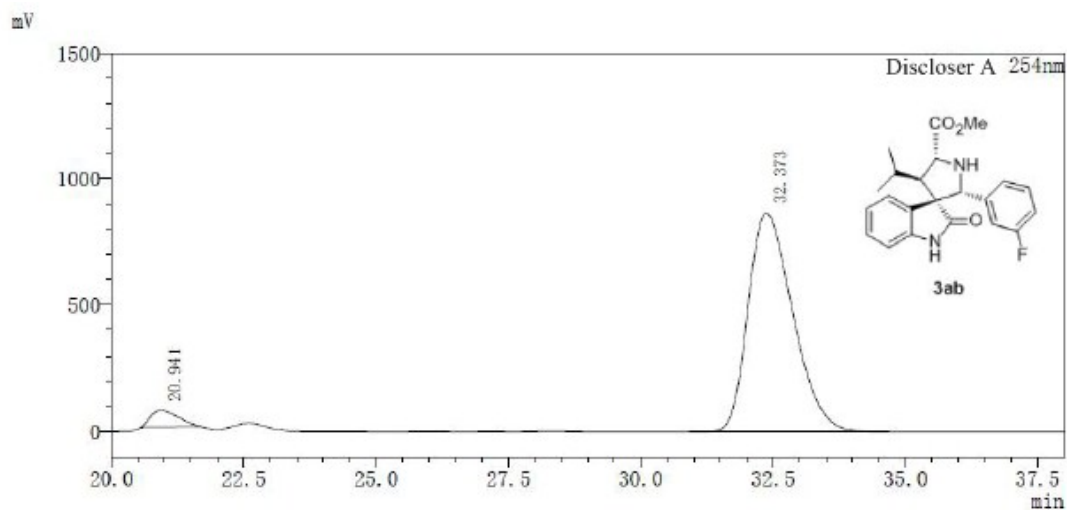

Discloser A 254 nm

| Peak  | Reten time (min) | Area (%) |
|-------|------------------|----------|
| 1     | 20.941           | 4.591    |
| 2     | 32.373           | 95.409   |
| Total |                  | 100.000  |

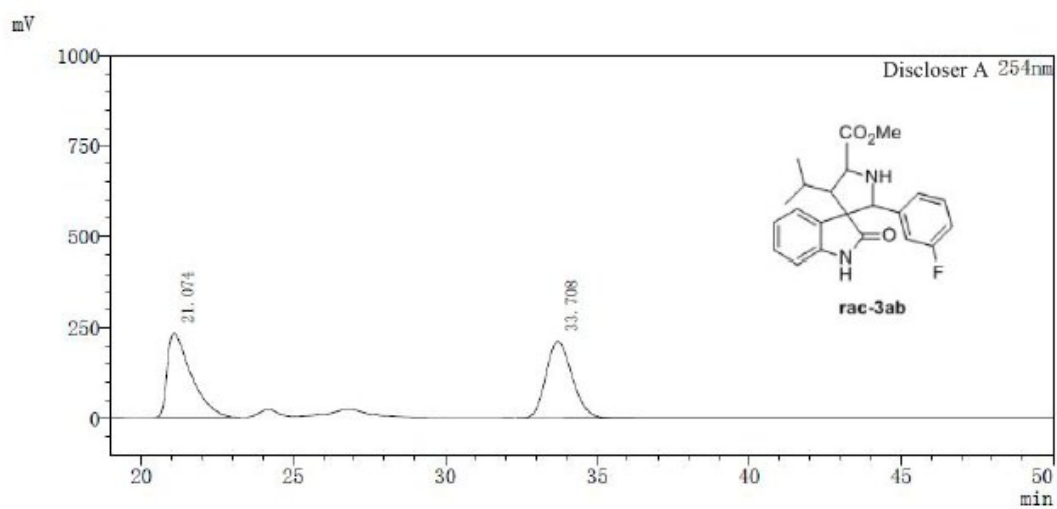

Discloser A 254 nm

| Peak  | Reten time (min) | Area (%) |
|-------|------------------|----------|
| 1     | 21.074           | 49.824   |
| 2     | 33.708           | 50.176   |
| Total |                  | 100.000  |

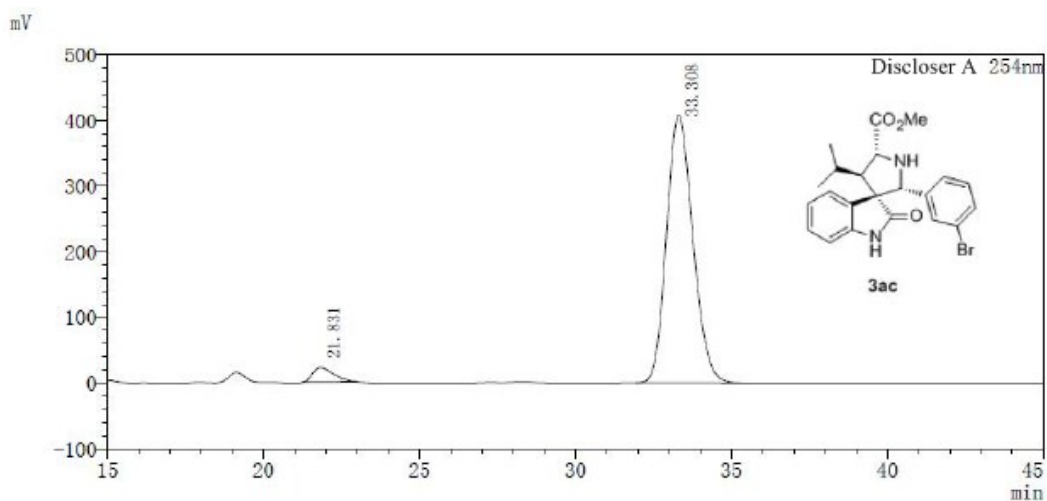

Discloser A 254 nm

| Peak  | Reten time (min) | Area (%) |
|-------|------------------|----------|
| 1     | 21.831           | 4.183    |
| 2     | 33.308           | 95.817   |
| Total |                  | 100.000  |

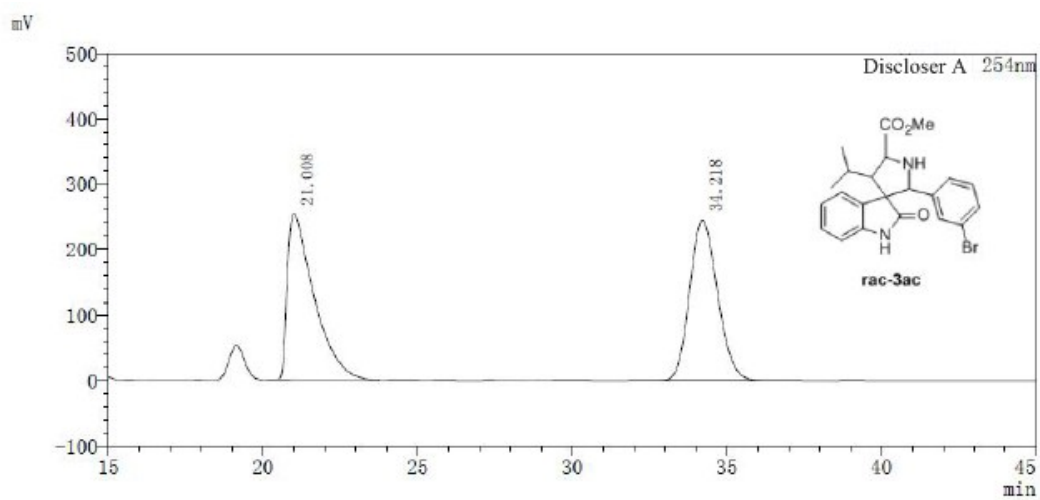

Discloser A 254 nm

| Peak  | Reten time (min) | Area (%) |
|-------|------------------|----------|
| 1     | 21.008           | 49.650   |
| 2     | 34.218           | 50.350   |
| Total |                  | 100.000  |

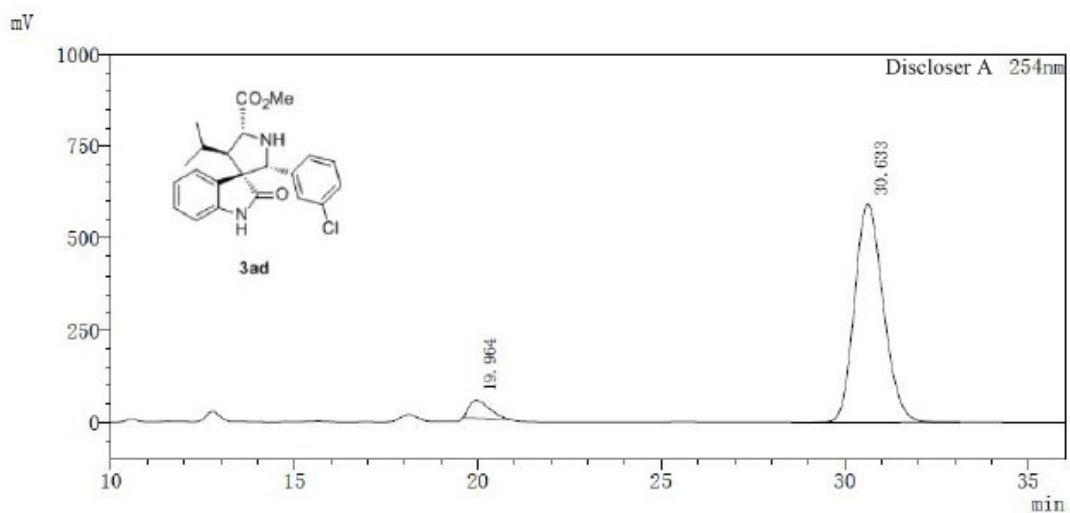

Discloser A 254 nm

| Peak  | Reten time (min) | Area (%) |
|-------|------------------|----------|
| 1     | 19.964           | 5.485    |
| 2     | 30.633           | 94.515   |
| Total |                  | 100.000  |

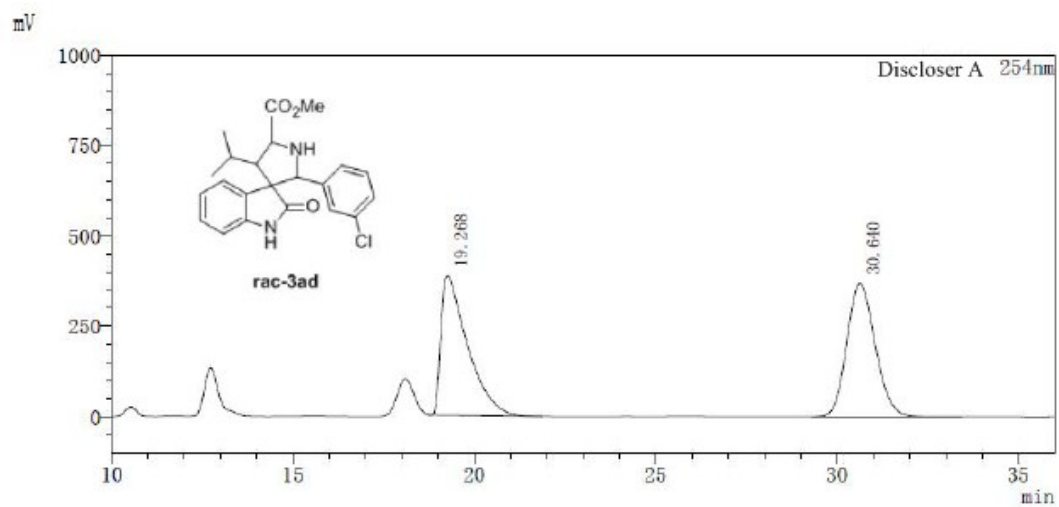

Discloser A 254 nm

| Peak  | Reten time (min) | Area (%) |
|-------|------------------|----------|
| 1     | 19.268           | 49.498   |
| 2     | 30.640           | 50.502   |
| Total |                  | 100.000  |

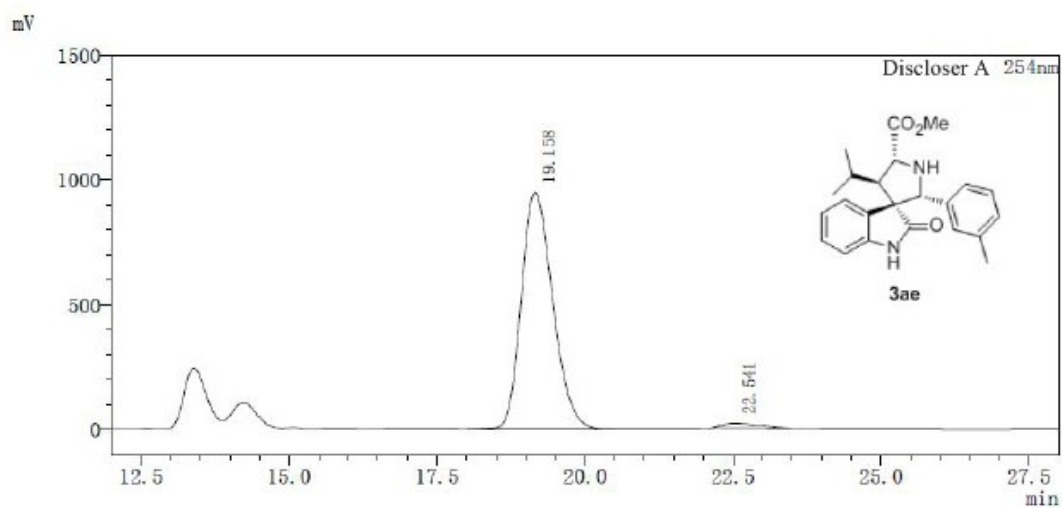

Discloser A 254 nm

| Peak  | Reten time (min) | Area (%) |
|-------|------------------|----------|
| 1     | 19.158           | 97.843   |
| 2     | 22.541           | 2.157    |
| Total |                  | 100.000  |

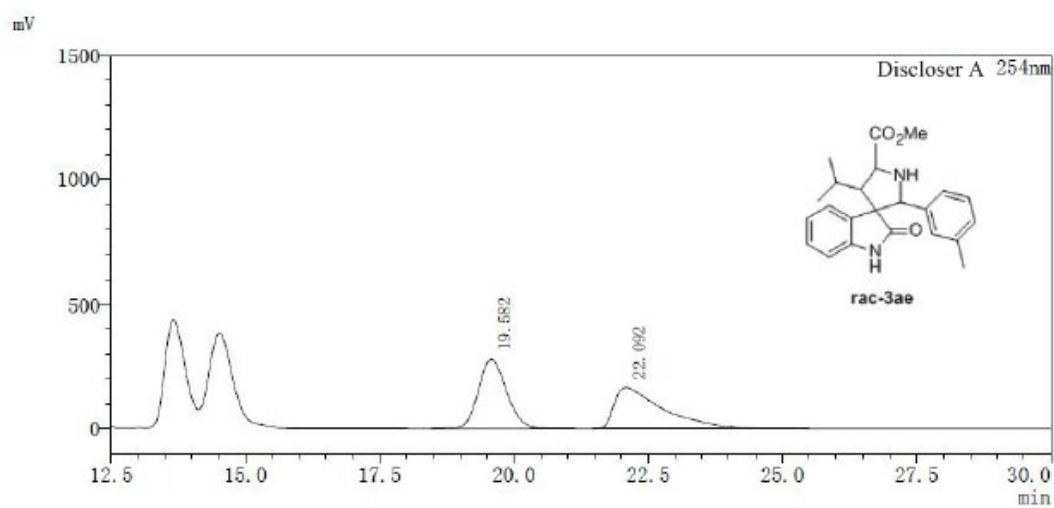

Discloser A 254 nm

| Peak  | Reten time (min) | Area (%) |
|-------|------------------|----------|
| 1     | 19.582           | 49.430   |
| 2     | 22.092           | 50.570   |
| Total |                  | 100.000  |

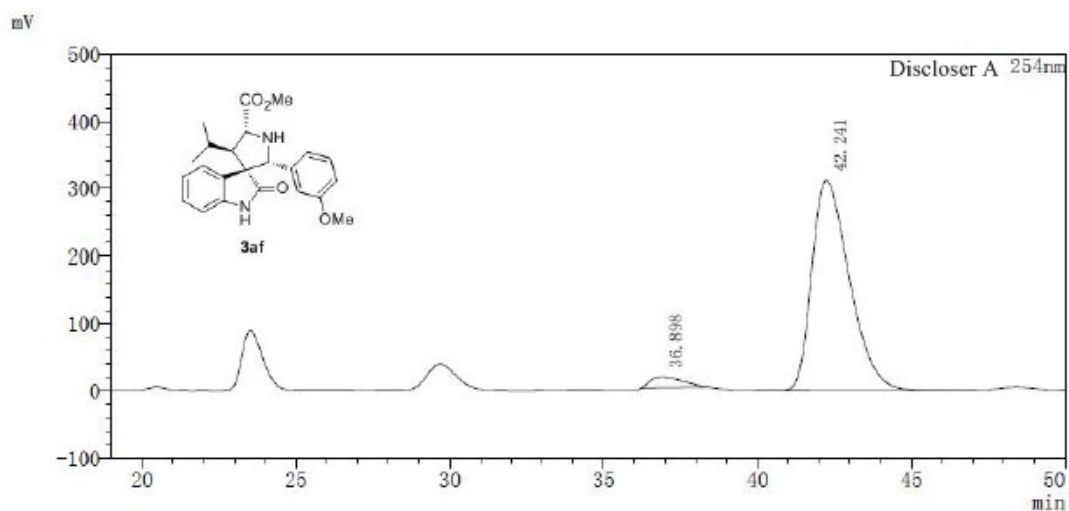

Discloser A 254 nm

| Peak  | Reten time (min) | Area (%) |
|-------|------------------|----------|
| 1     | 36.898           | 4.251    |
| 2     | 42.241           | 95.749   |
| Total |                  | 100.000  |

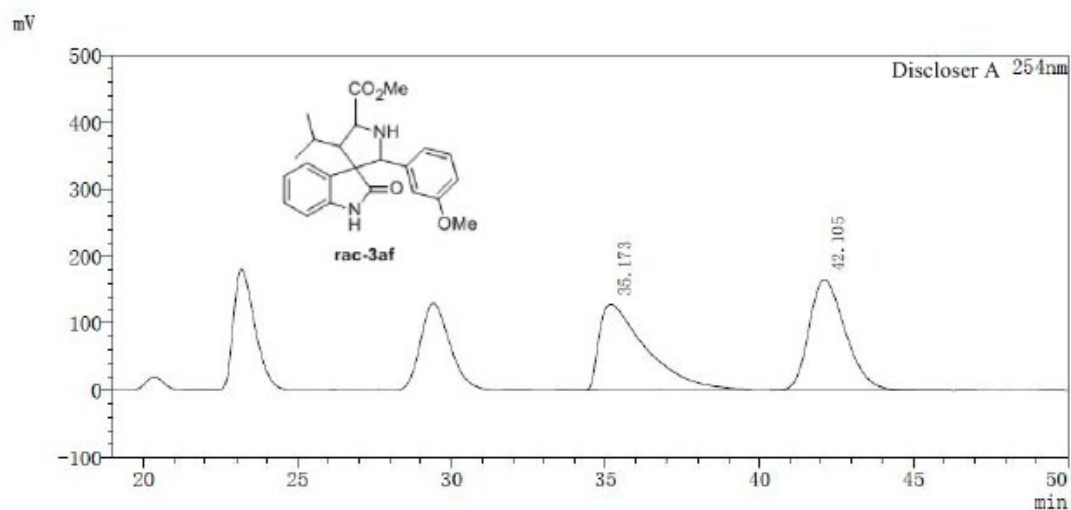

Discloser A 254 nm

| Peak  | Reten time (min) | Area (%) |
|-------|------------------|----------|
| 1     | 35.173           | 50.102   |
| 2     | 42.105           | 49.898   |
| Total |                  | 100.000  |

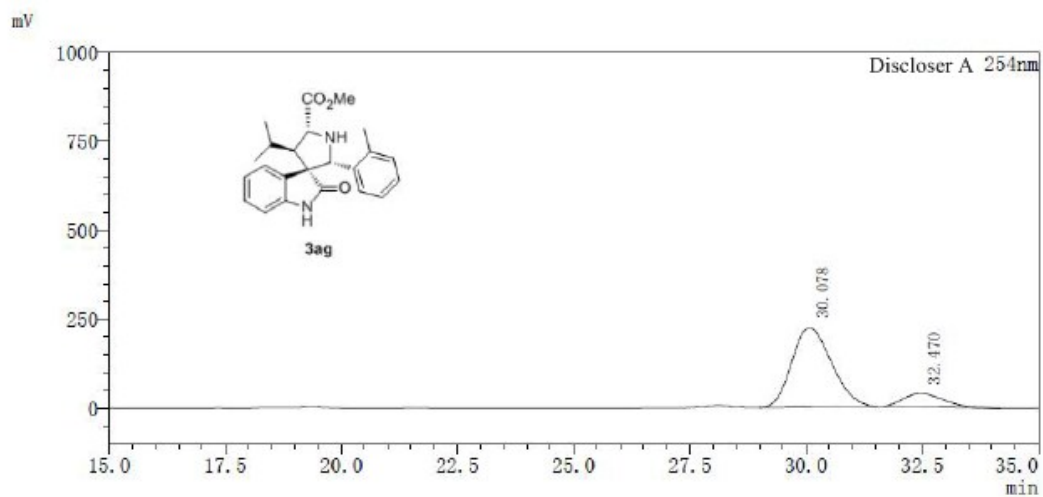

Discloser A 254 nm

| Peak  | Reten time (min) | Area (%) |
|-------|------------------|----------|
| 1     | 30.078           | 85.953   |
| 2     | 32.470           | 14.047   |
| Total |                  | 100.000  |

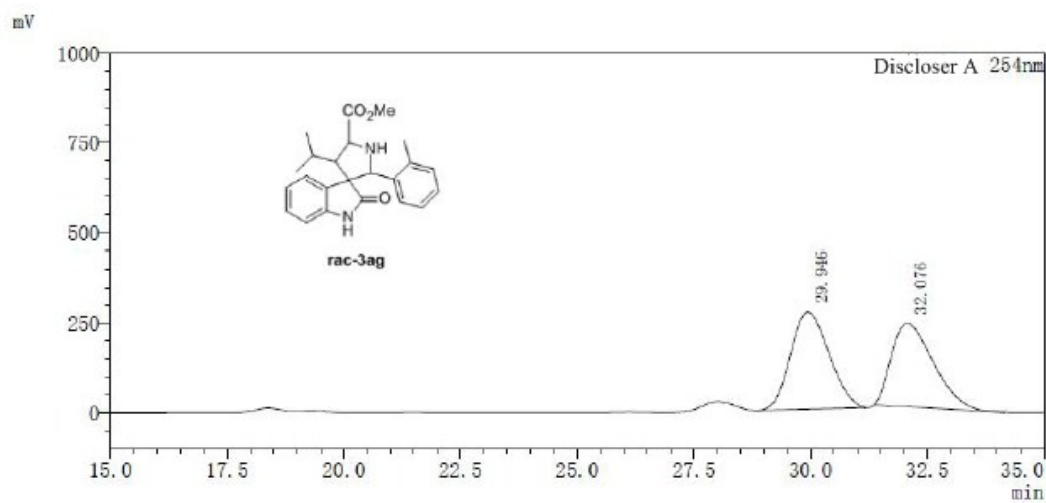

Discloser A 254 nm

| Peak  | Reten time (min) | Area (%) |
|-------|------------------|----------|
| 1     | 29.946           | 51.716   |
| 2     | 32.076           | 48.284   |
| Total |                  | 100.000  |



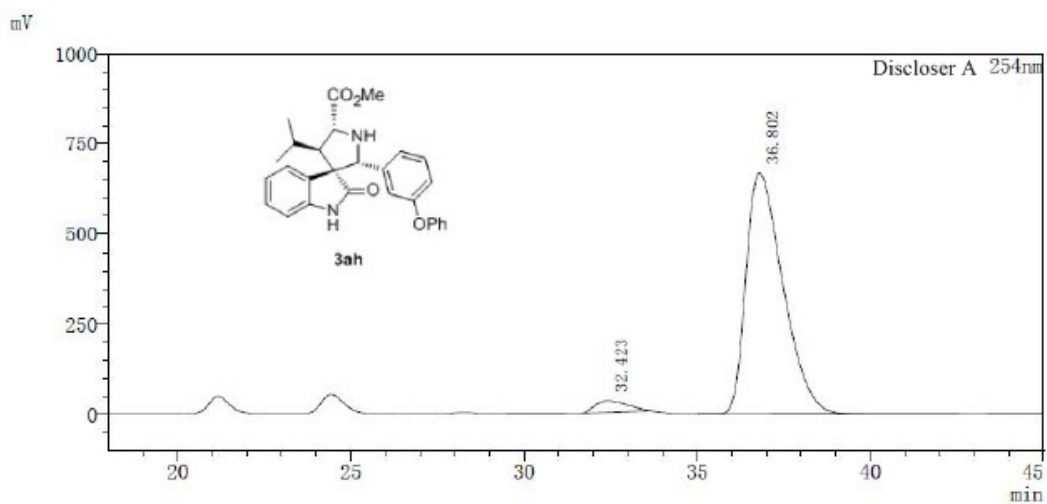

Discloser A 254 nm

| Peak  | Reten time (min) | Area (%) |
|-------|------------------|----------|
| 1     | 32.423           | 4.110    |
| 2     | 36.802           | 95.890   |
| Total |                  | 100.000  |

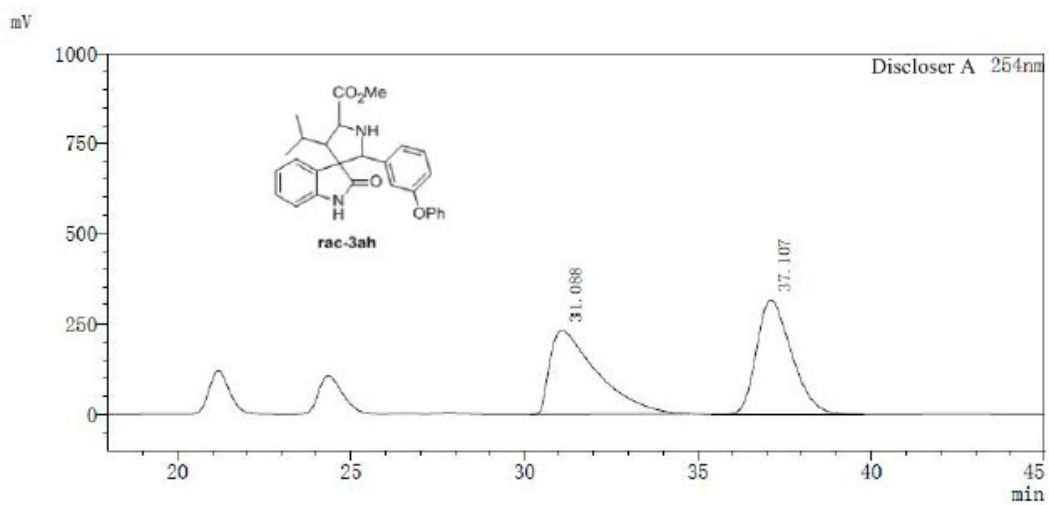

Discloser A 254 nm

| Peak  | Reten time (min) | Area (%) |
|-------|------------------|----------|
| 1     | 31.088           | 49.808   |
| 2     | 37.107           | 50.192   |
| Total |                  | 100.000  |

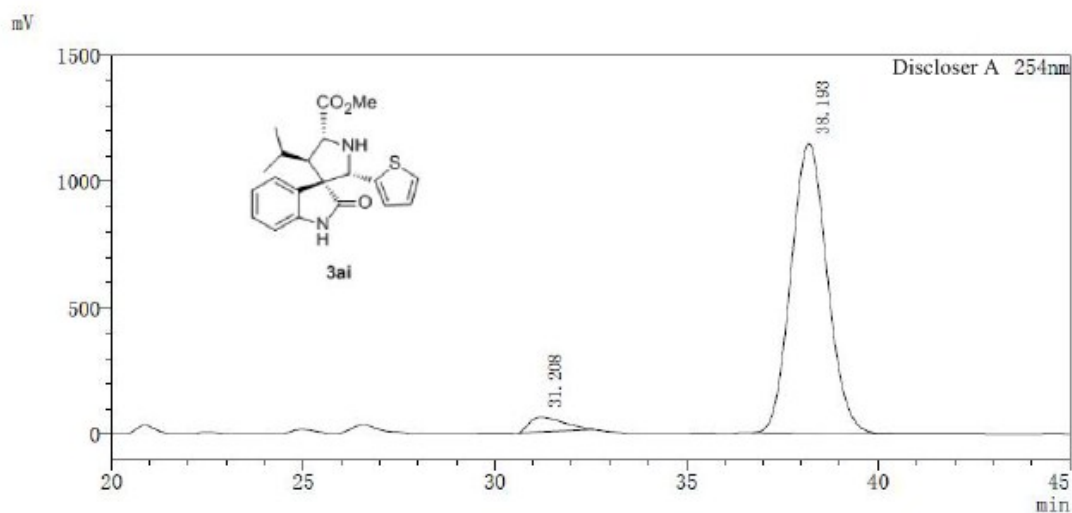

Discloser A 254 nm

| Peak  | Reten time (min) | Area (%) |
|-------|------------------|----------|
| 1     | 31.208           | 4.549    |
| 2     | 38.193           | 95.451   |
| Total |                  | 100.000  |

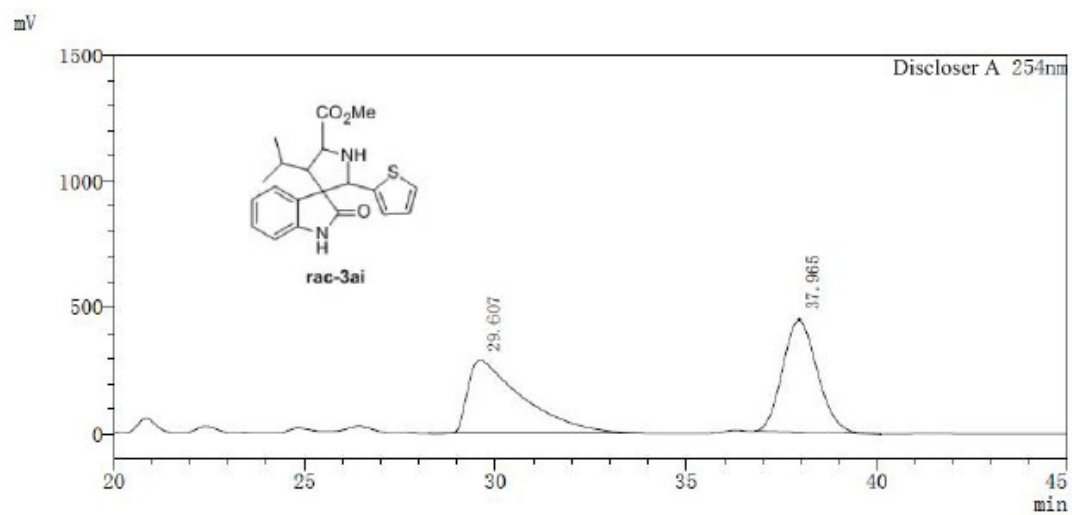

Discloser A 254 nm

| Peak  | Reten time (min) | Area (%) |
|-------|------------------|----------|
| 1     | 29.607           | 50.751   |
| 2     | 37.965           | 49.249   |
| Total |                  | 100.000  |

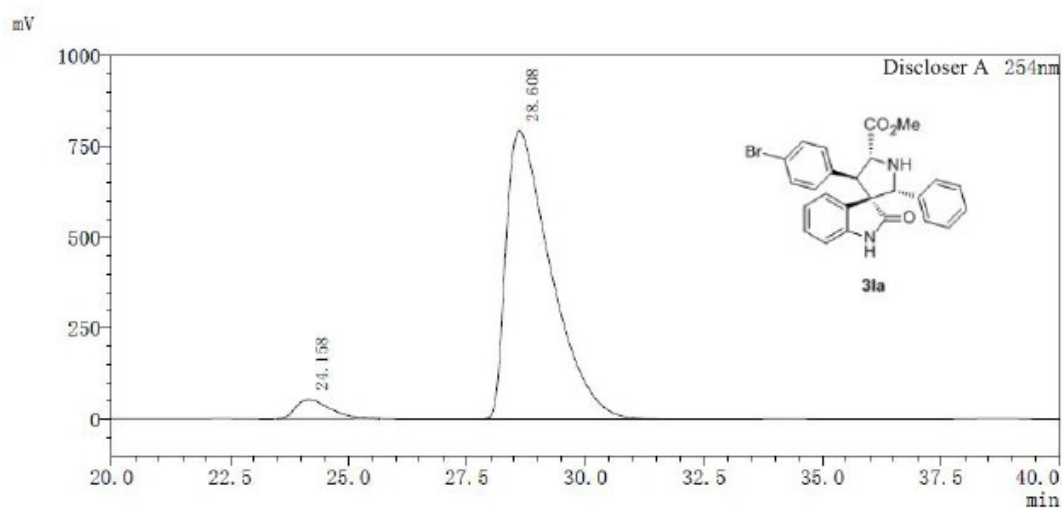

Discloser A 254 nm

| Peak  | Reten time (min) | Area (%) |
|-------|------------------|----------|
| 1     | 24.158           | 4.946    |
| 2     | 28.608           | 95.054   |
| Total |                  | 100.000  |

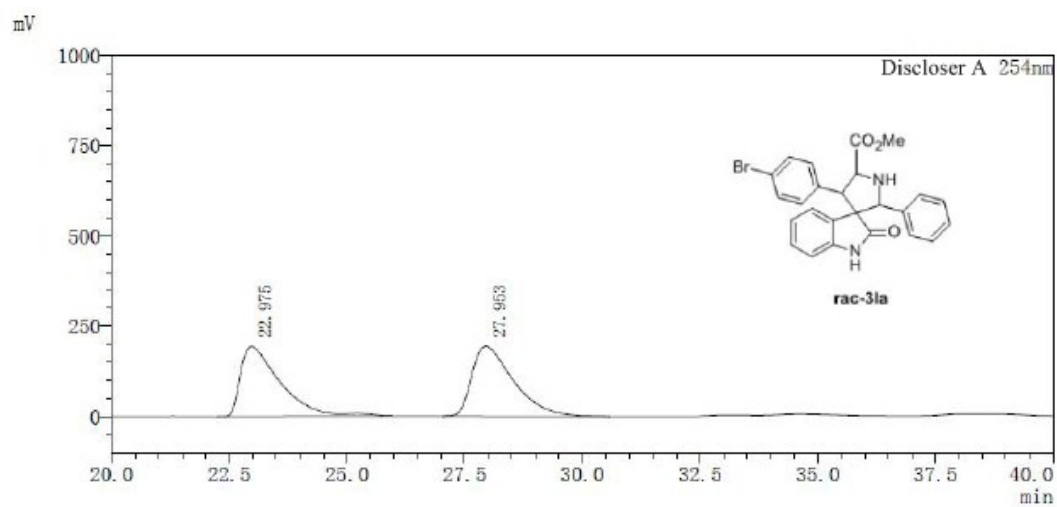

Discloser A 254 nm

| Peak  | Reten time (min) | Area (%) |
|-------|------------------|----------|
| 1     | 22.975           | 49.001   |
| 2     | 27.953           | 50.999   |
| Total |                  | 100.000  |

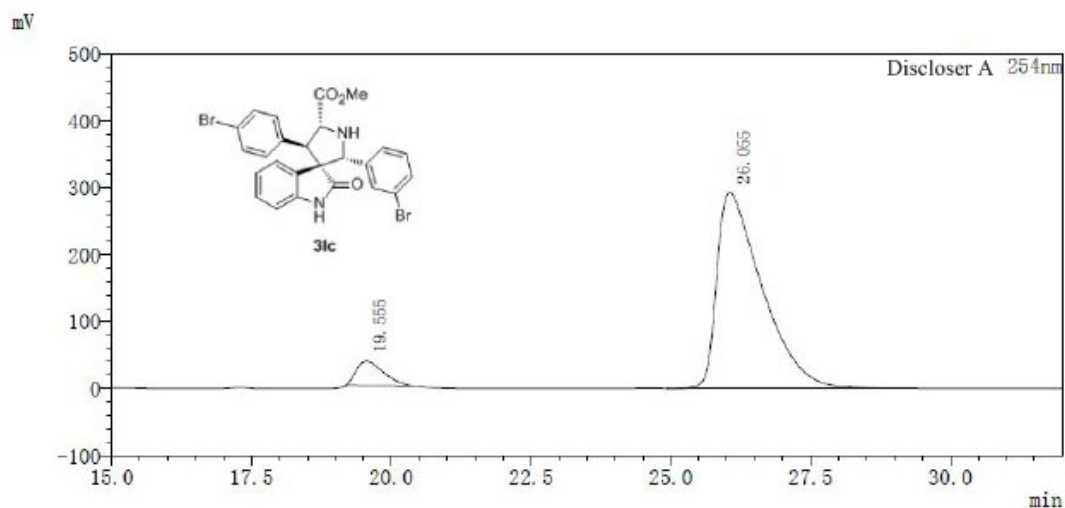

Discloser A 254 nm

| Peak  | Reten time (min) | Area (%) |
|-------|------------------|----------|
| 1     | 19.555           | 6.962    |
| 2     | 26.055           | 93.038   |
| Total |                  | 100.000  |

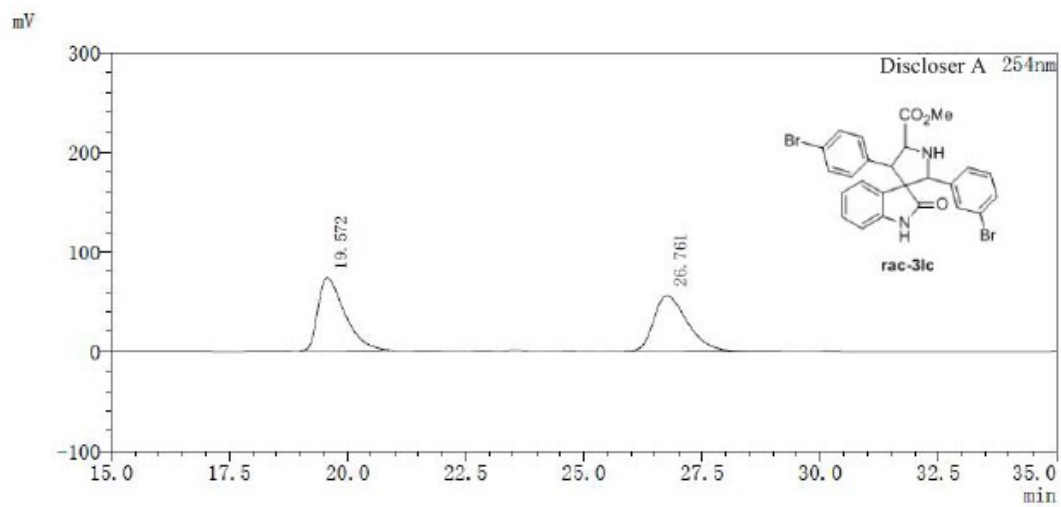

Discloser A 254 nm

| Peak  | Reten time (min) | Area (%) |
|-------|------------------|----------|
| 1     | 19.572           | 50.822   |
| 2     | 26.761           | 49.178   |
| Total |                  | 100.000  |

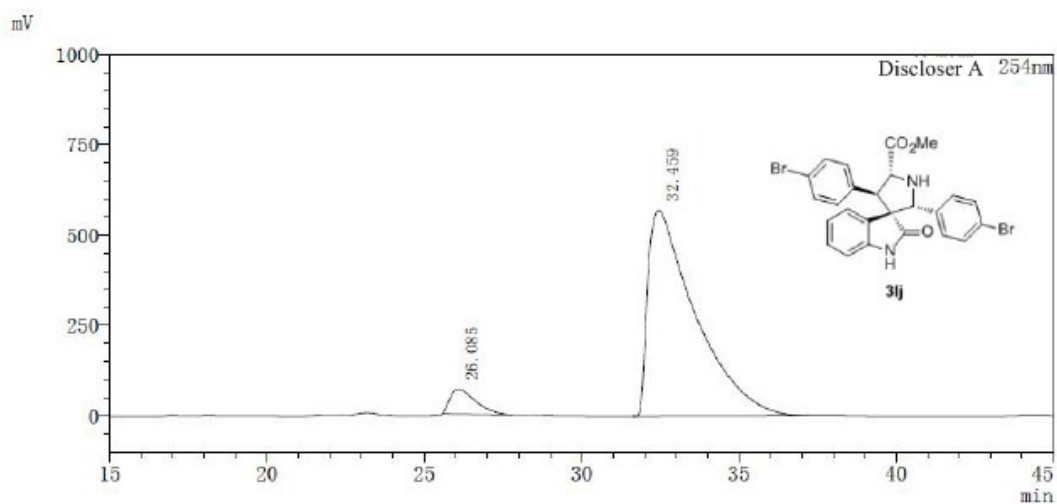

Discloser A 254 nm

| Peak  | Reten time (min) | Area (%) |
|-------|------------------|----------|
| 1     | 26.085           | 6.085    |
| 2     | 32.459           | 93.915   |
| Total |                  | 100.000  |

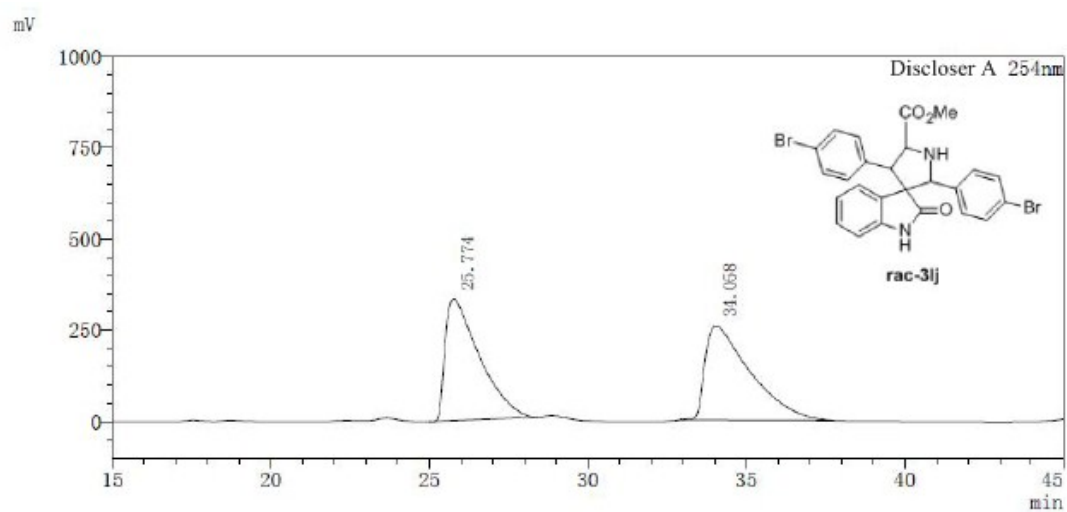

Discloser A 254 nm

| Peak  | Reten time (min) | Area (%) |
|-------|------------------|----------|
| 1     | 25.774           | 49.449   |
| 2     | 34.058           | 50.551   |
| Total |                  | 100.000  |

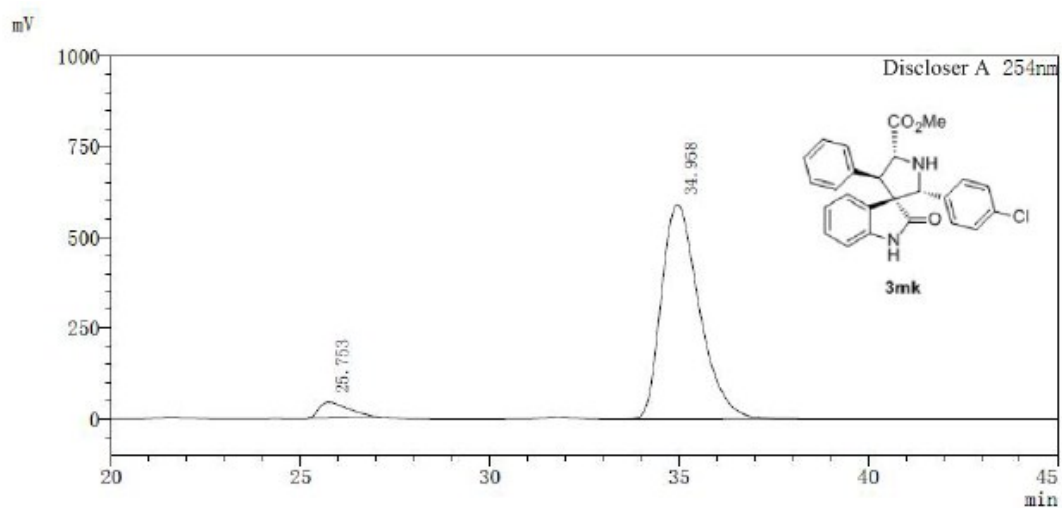

Discloser A 254 nm

| Peak  | Reten time (min) | Area (%) |
|-------|------------------|----------|
| 1     | 25.753           | 5.444    |
| 2     | 34.958           | 94.556   |
| Total |                  | 100.000  |

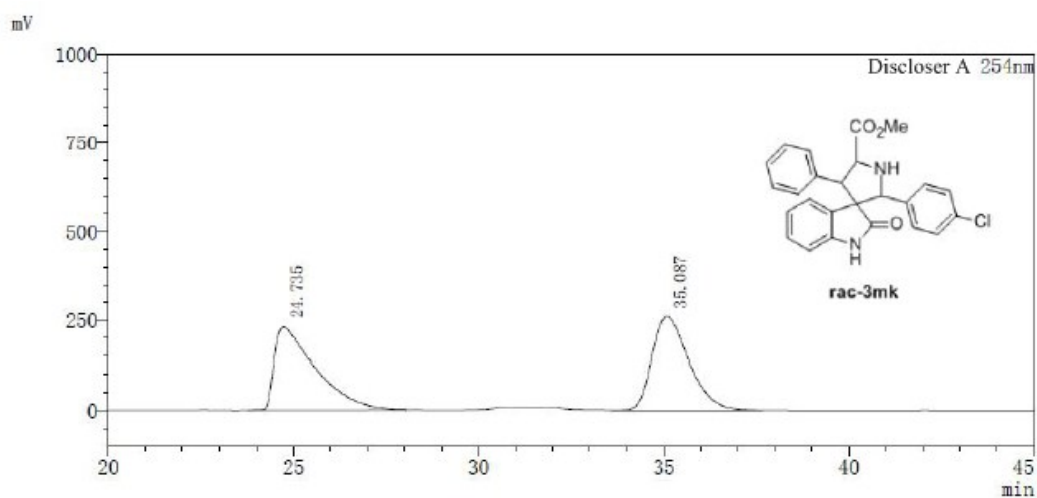

Discloser A 254 nm

| Peak  | Reten time (min) | Area (%) |
|-------|------------------|----------|
| 1     | 24.735           | 49.879   |
| 2     | 35.087           | 50.121   |
| Total |                  | 100.000  |

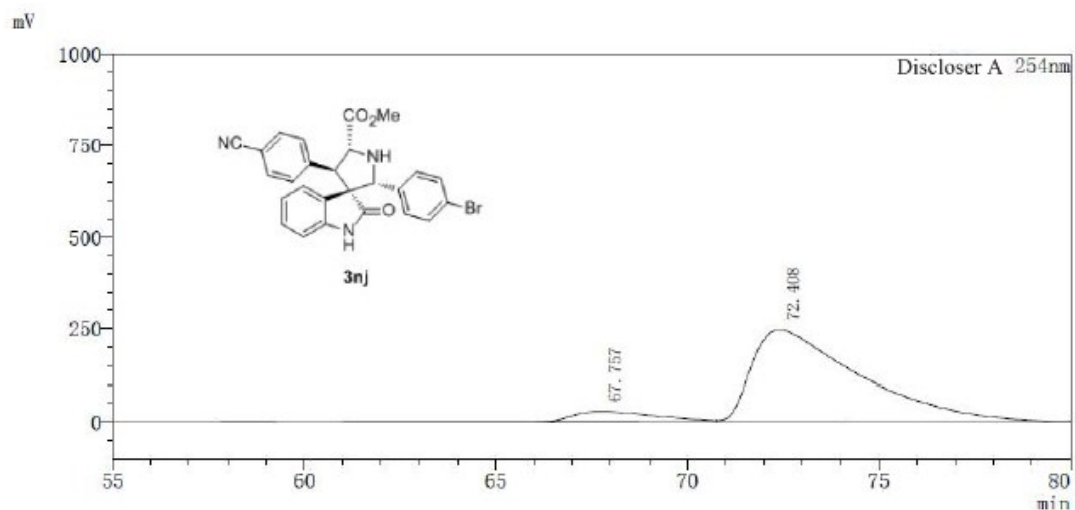

Discloser A 254 nm

| Peak  | Reten time (min) | Area (%) |
|-------|------------------|----------|
| 1     | 67.757           | 8.472    |
| 2     | 72.408           | 91.528   |
| Total |                  | 100.000  |

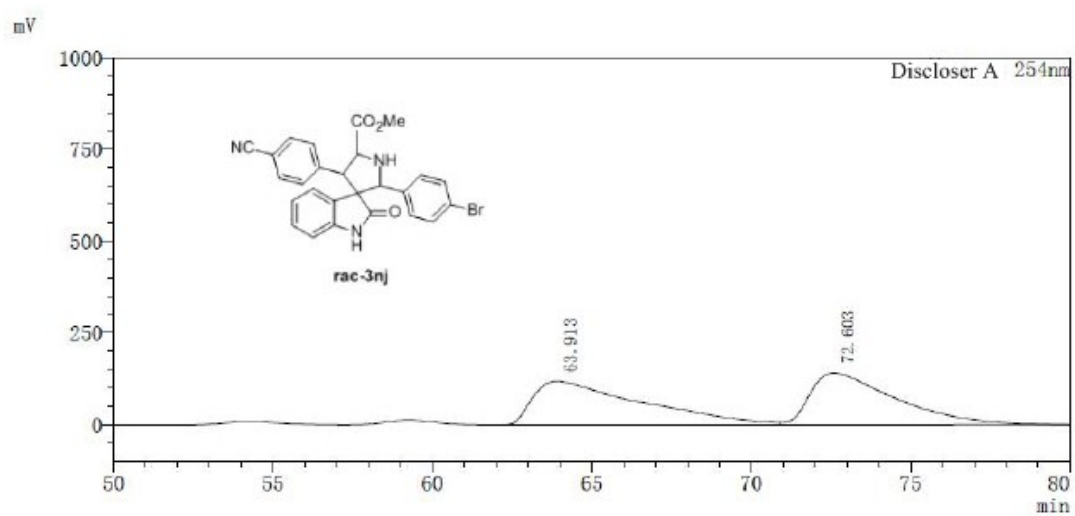

Discloser A 254 nm

| Peak  | Reten time (min) | Area (%) |
|-------|------------------|----------|
| 1     | 63.913           | 51.713   |
| 2     | 72.603           | 48.287   |
| Total |                  | 100.000  |

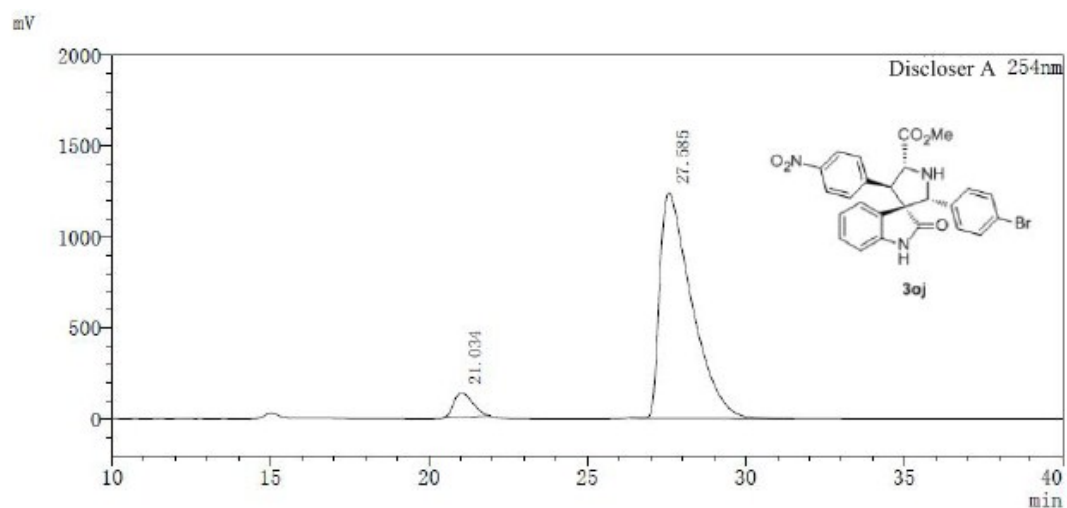

Discloser A 254 nm

| Peak  | Reten time (min) | Area (%) |
|-------|------------------|----------|
| 1     | 21.034           | 6.138    |
| 2     | 27.585           | 93.862   |
| Total |                  | 100.000  |

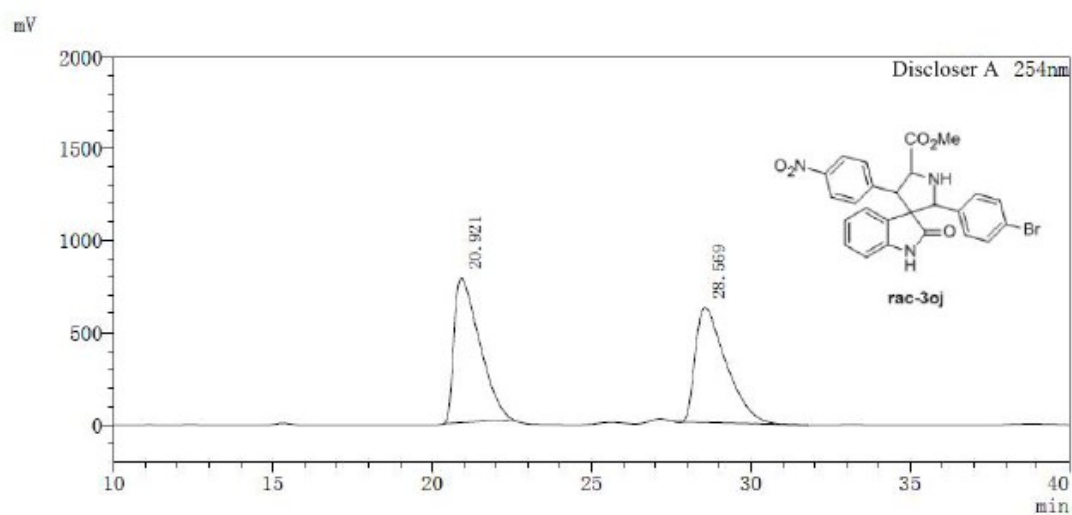

Discloser A 254 nm

| Peak  | Reten time (min) | Area (%) |
|-------|------------------|----------|
| 1     | 20.921           | 51.077   |
| 2     | 28.569           | 48.923   |
| Total |                  | 100.000  |



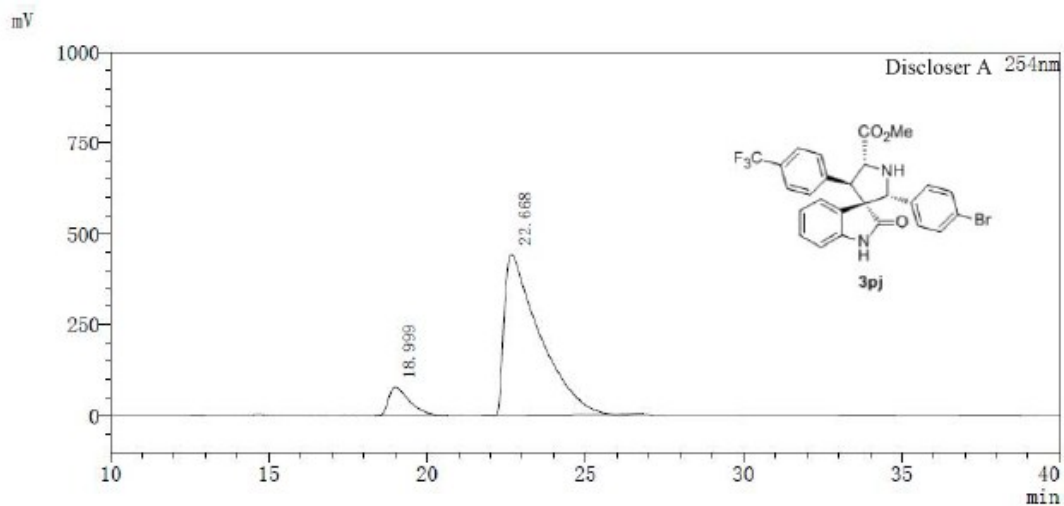

Discloser A 254 nm

| Peak  | Reten time (min) | Area (%) |
|-------|------------------|----------|
| 1     | 18.999           | 9.470    |
| 2     | 22.668           | 90.530   |
| Total |                  | 100.000  |

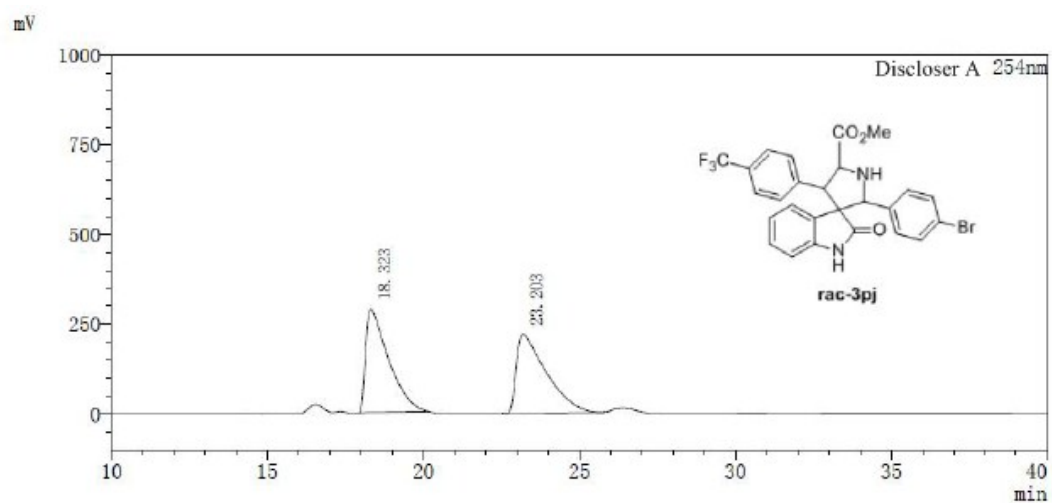

Discloser A 254 nm

| Peak  | Reten time (min) | Area (%) |
|-------|------------------|----------|
| 1     | 18.323           | 50.238   |
| 2     | 23.203           | 49.762   |
| Total |                  | 100.000  |

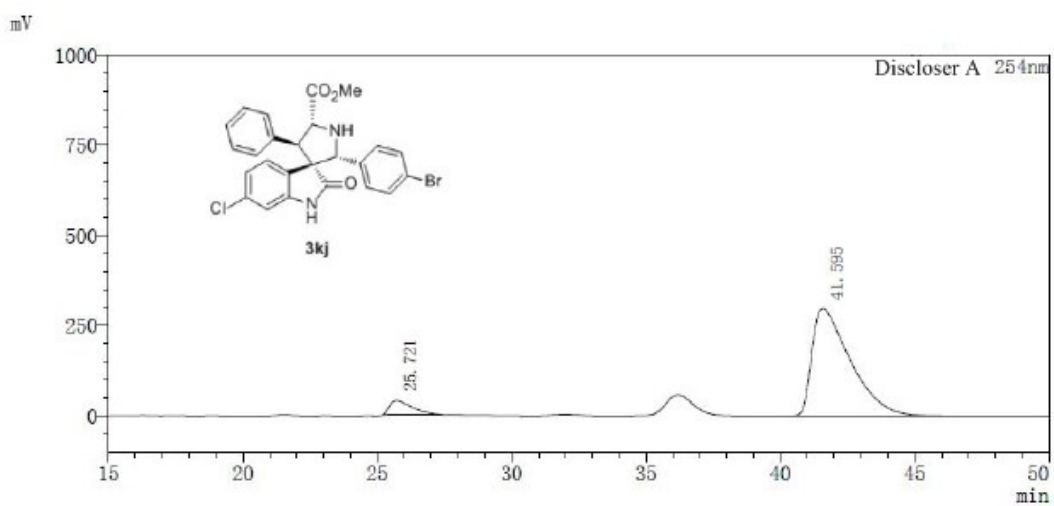

Discloser A 254 nm

| Peak  | Reten time (min) | Area (%) |
|-------|------------------|----------|
| 1     | 25.721           | 7.181    |
| 2     | 41.595           | 92.819   |
| Total |                  | 100.000  |

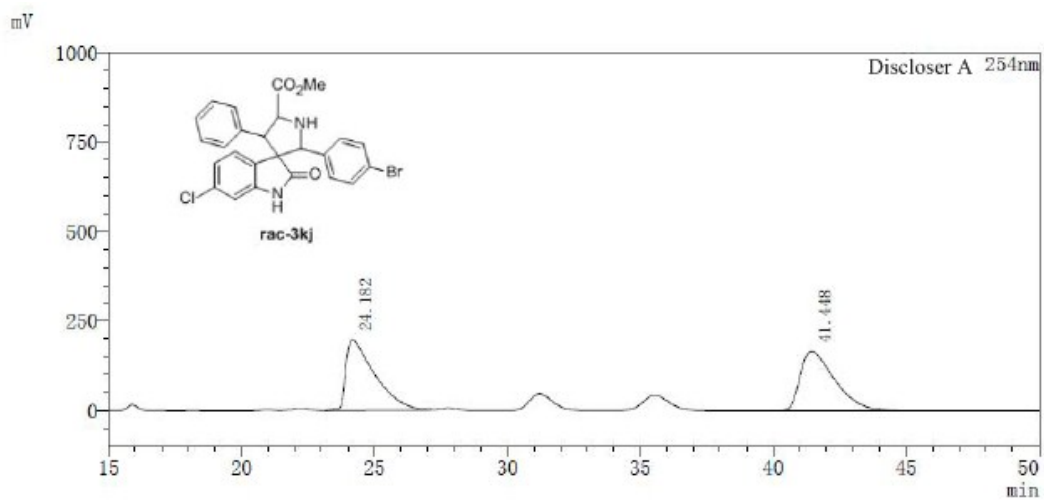

Discloser A 254 nm

| Peak  | Reten time (min) | Area (%) |
|-------|------------------|----------|
| 1     | 24.182           | 49.733   |
| 2     | 41.448           | 50.267   |
| Total |                  | 100.000  |

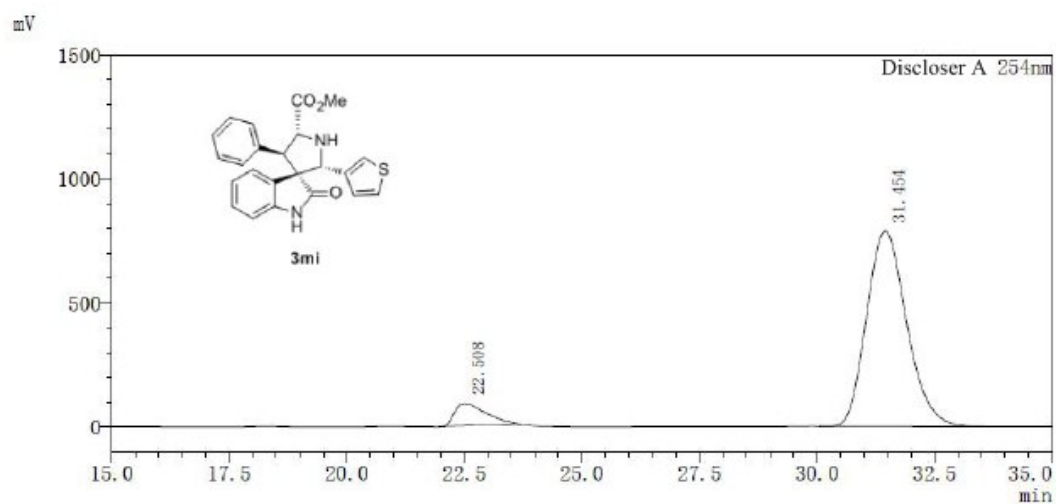

Discloser A 254 nm

| Peak  | Reten time (min) | Area (%) |
|-------|------------------|----------|
| 1     | 22.508           | 8.047    |
| 2     | 31.454           | 91.953   |
| Total |                  | 100.000  |

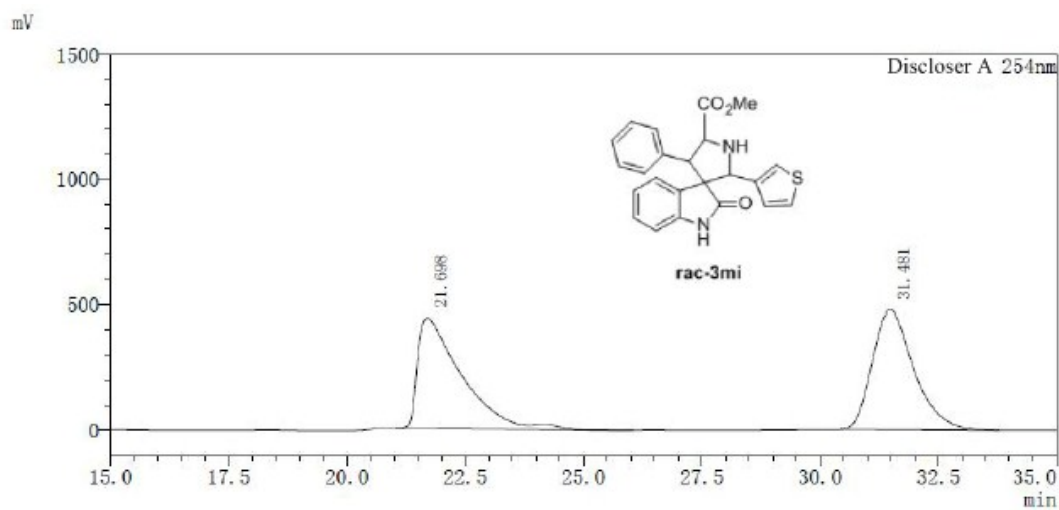

Discloser A 254 nm

| Peak  | Reten time (min) | Area (%) |
|-------|------------------|----------|
| 1     | 21.698           | 49.544   |
| 2     | 31.481           | 50.456   |
| Total |                  | 100.000  |

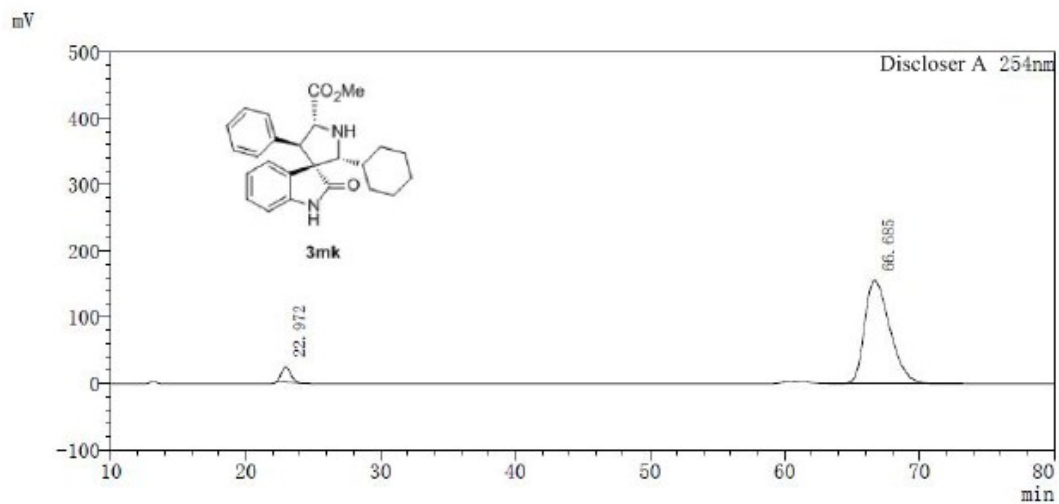

Discloser A 254 nm

| Peak  | Reten time (min) | Area (%) |
|-------|------------------|----------|
| 1     | 22.972           | 5.203    |
| 2     | 66.685           | 94.797   |
| Total |                  | 100.000  |

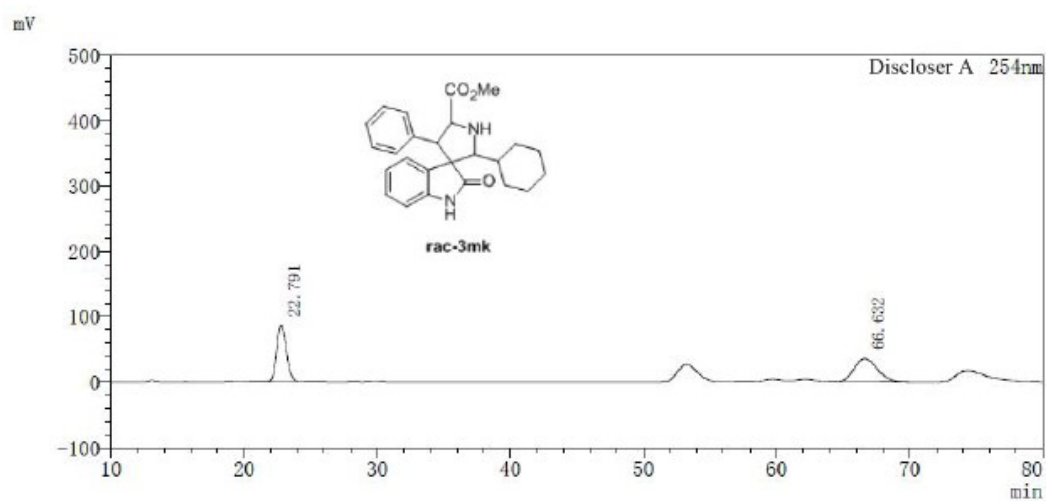

Discloser A 254 nm

| Peak  | Reten time (min) | Area (%) |
|-------|------------------|----------|
| 1     | 22.791           | 50.699   |
| 2     | 66.632           | 49.301   |
| Total |                  | 100.000  |

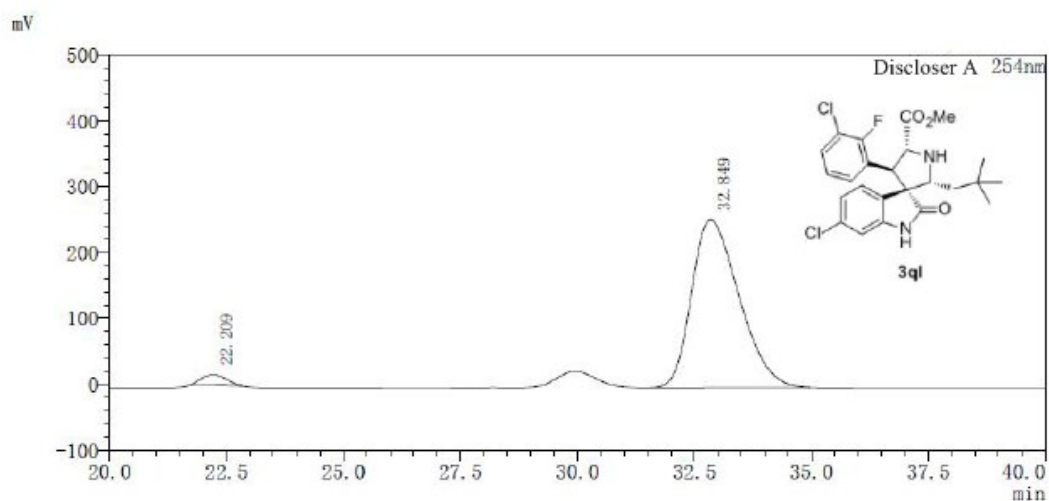

Discloser A 254 nm

| Peak  | Reten time (min) | Area (%) |
|-------|------------------|----------|
| 1     | 22.209           | 3.121    |
| 2     | 32.849           | 96.879   |
| Total |                  | 100.000  |

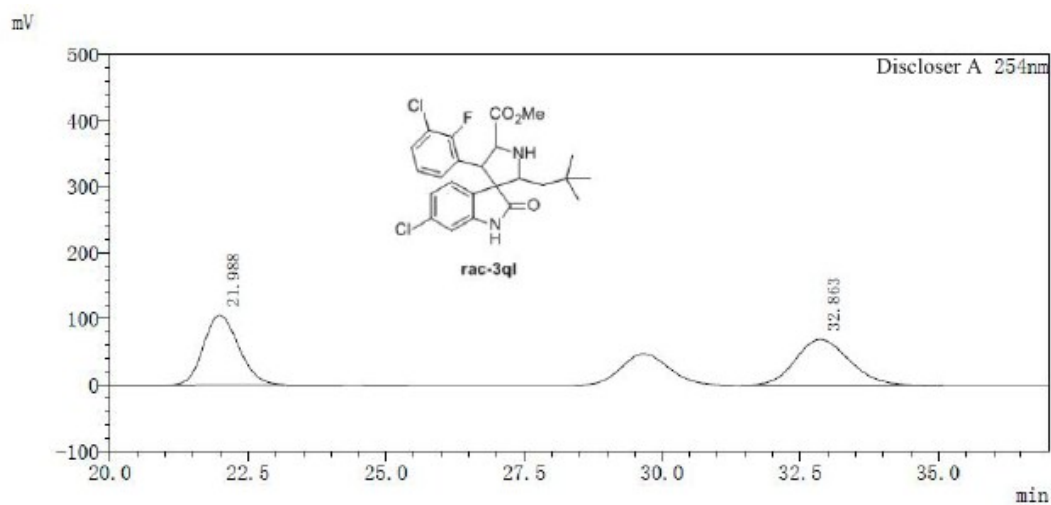

Discloser A 254 nm

| Peak  | Reten time (min) | Area (%) |
|-------|------------------|----------|
| 1     | 21.988           | 50.040   |
| 2     | 32.863           | 49.960   |
| Total |                  | 100.000  |

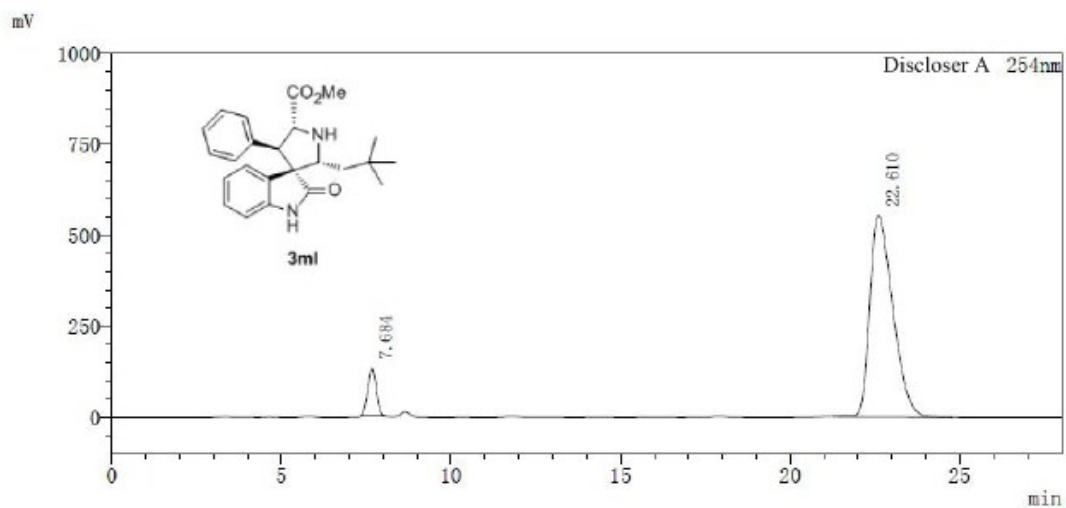

Discloser A 254 nm

| Peak  | Reten time (min) | Area (%) |
|-------|------------------|----------|
| 1     | 7.684            | 8.224    |
| 2     | 22.610           | 91.776   |
| Total |                  | 100.000  |

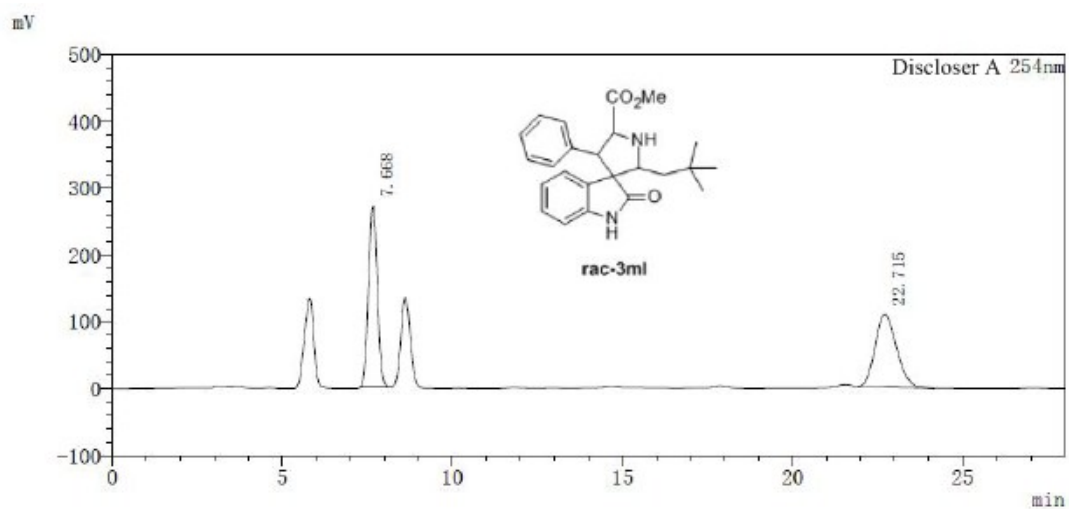

Discloser A 254 nm

| Peak  | Reten time (min) | Area (%) |
|-------|------------------|----------|
| 1     | 7.668            | 50.611   |
| 2     | 22.715           | 49.389   |
| Total |                  | 100.000  |

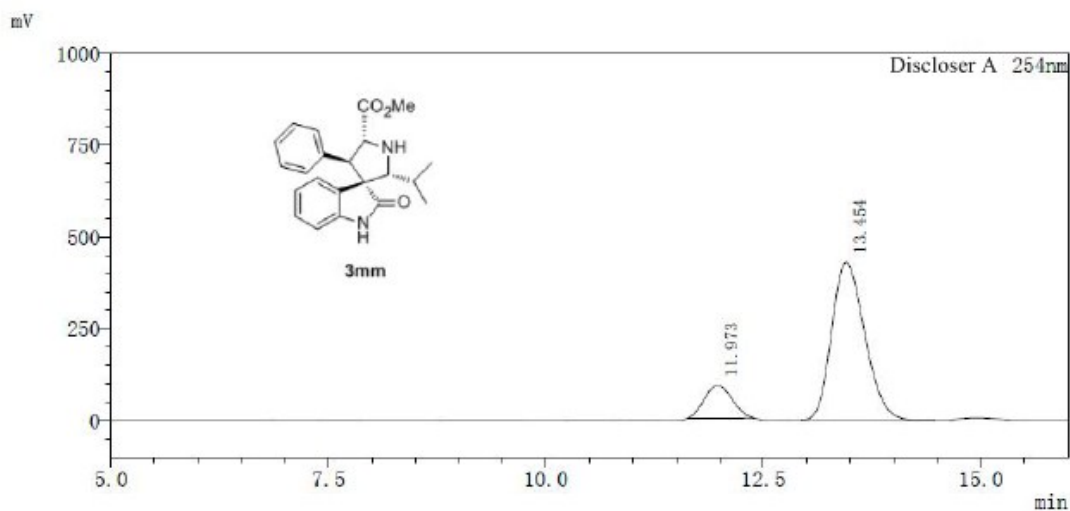

Discloser A 254 nm

| Peak  | Reten time (min) | Area (%) |
|-------|------------------|----------|
| 1     | 11.973           | 14.891   |
| 2     | 13.454           | 85.109   |
| Total |                  | 100.000  |

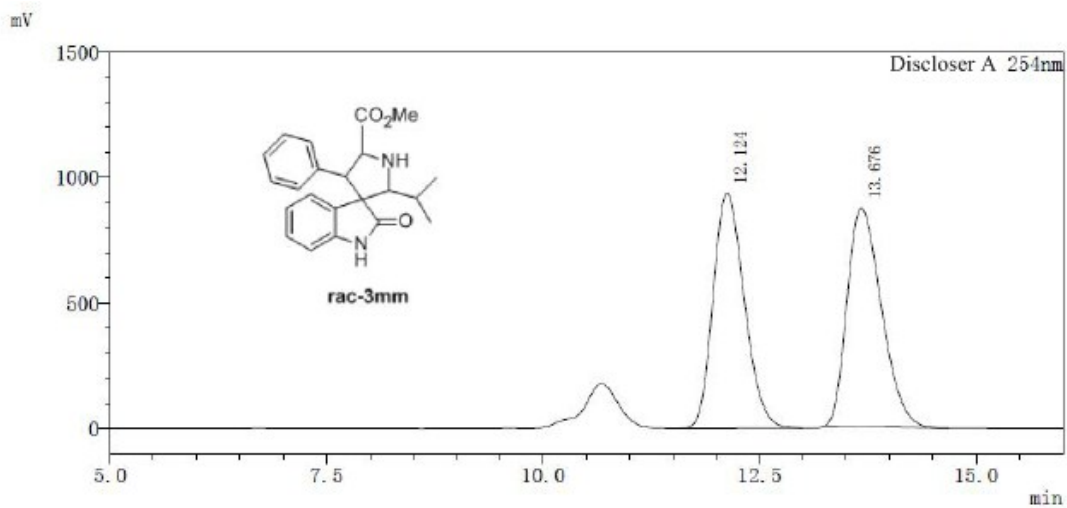

Discloser A 254 nm

| Peak  | Reten time (min) | Area (%) |
|-------|------------------|----------|
| 1     | 12.124           | 49.438   |
| 2     | 13.676           | 50.562   |
| Total |                  | 100.000  |

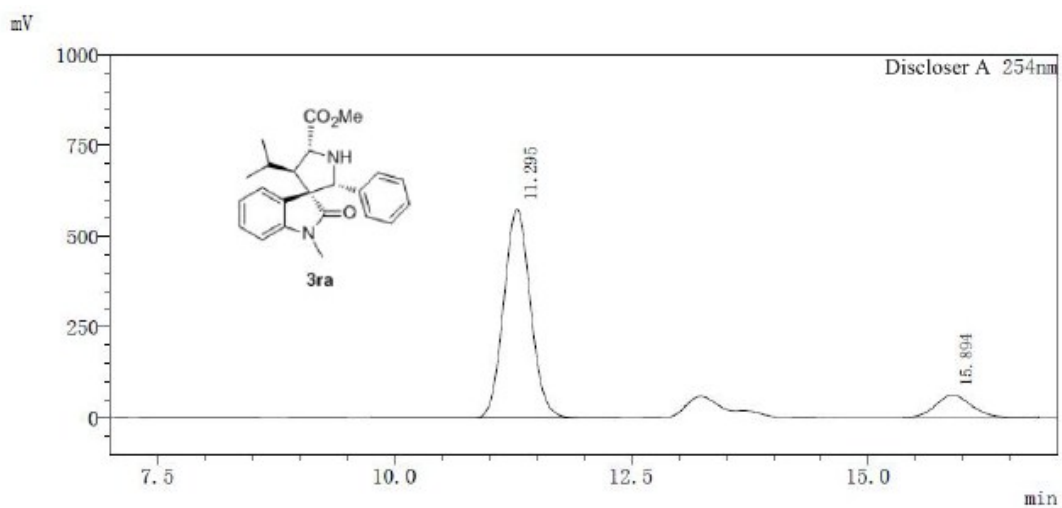

Discloser A 254 nm

| Peak  | Reten time (min) | Area (%) |
|-------|------------------|----------|
| 1     | 11.295           | 87.434   |
| 2     | 15.894           | 12.566   |
| Total |                  | 100.000  |

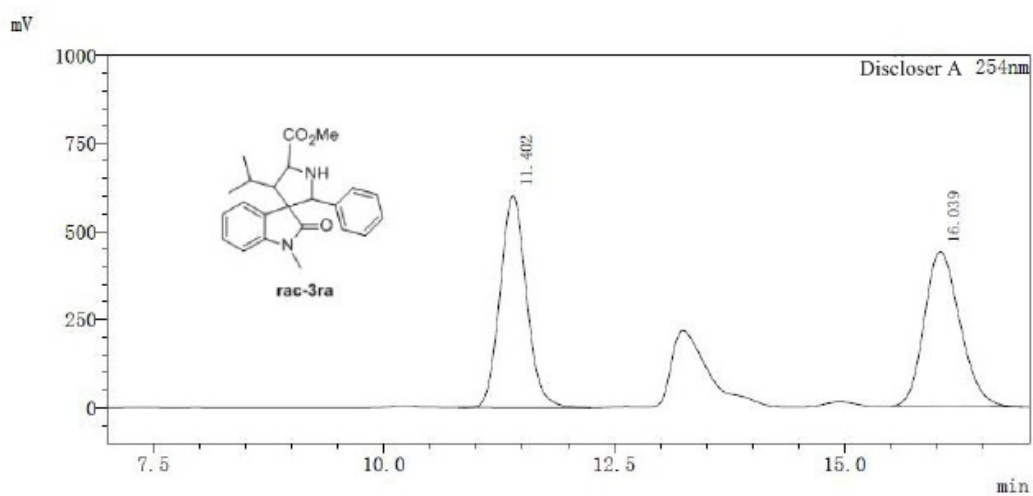

Discloser A 254 nm

| Peak  | Reten time (min) | Area (%) |
|-------|------------------|----------|
| 1     | 11.402           | 50.442   |
| 2     | 16.039           | 49.558   |
| Total |                  | 100.000  |



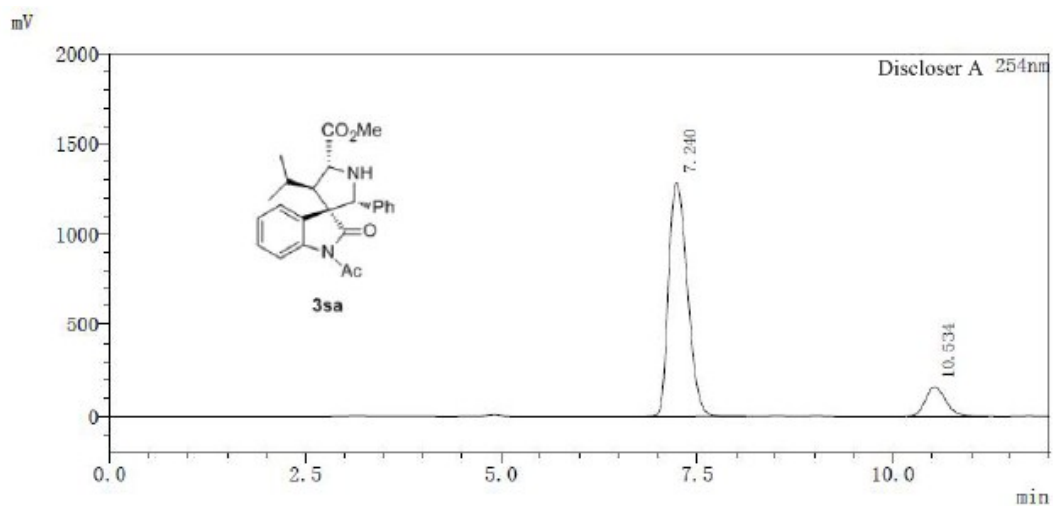

Discloser A 254 nm

| Peak  | Reten time (min) | Area (%) |
|-------|------------------|----------|
| 1     | 7.240            | 87.835   |
| 2     | 10.534           | 12.165   |
| Total |                  | 100.000  |

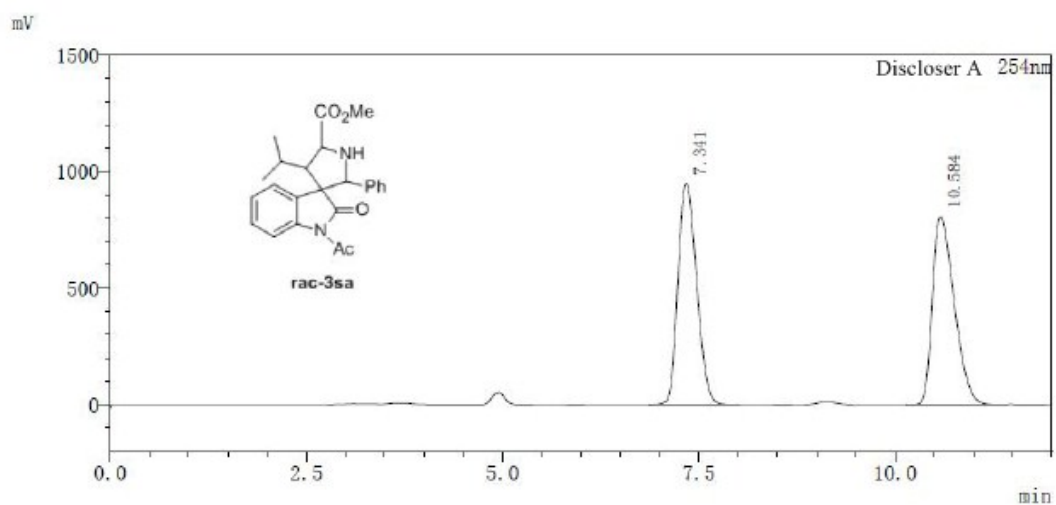

Discloser A 254 nm

| Peak  | Reten time (min) | Area (%) |
|-------|------------------|----------|
| 1     | 7.341            | 50.063   |
| 2     | 10.584           | 49.937   |
| Total |                  | 100.000  |

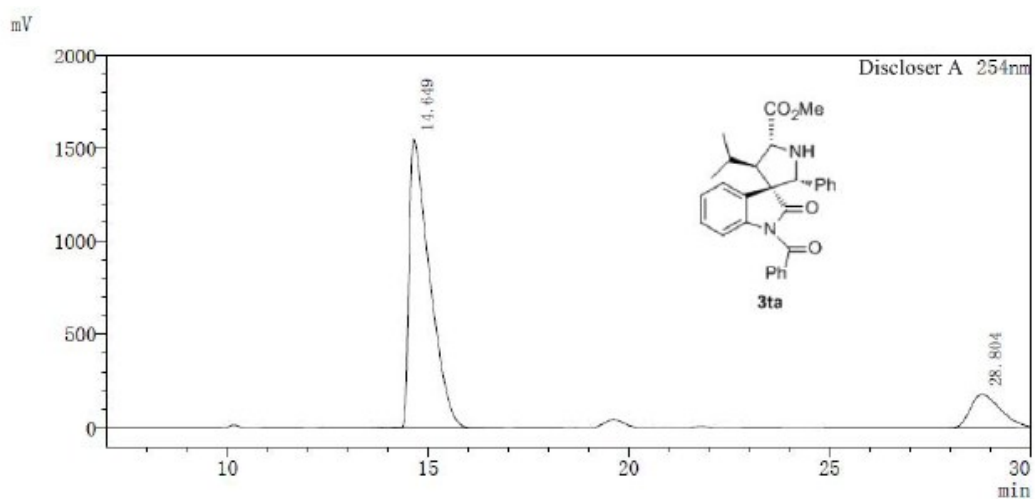

Discloser A 254 nm

| Peak  | Reten time (min) | Area (%) |
|-------|------------------|----------|
| 1     | 14.649           | 84.980   |
| 2     | 28.804           | 15.020   |
| Total |                  | 100.000  |

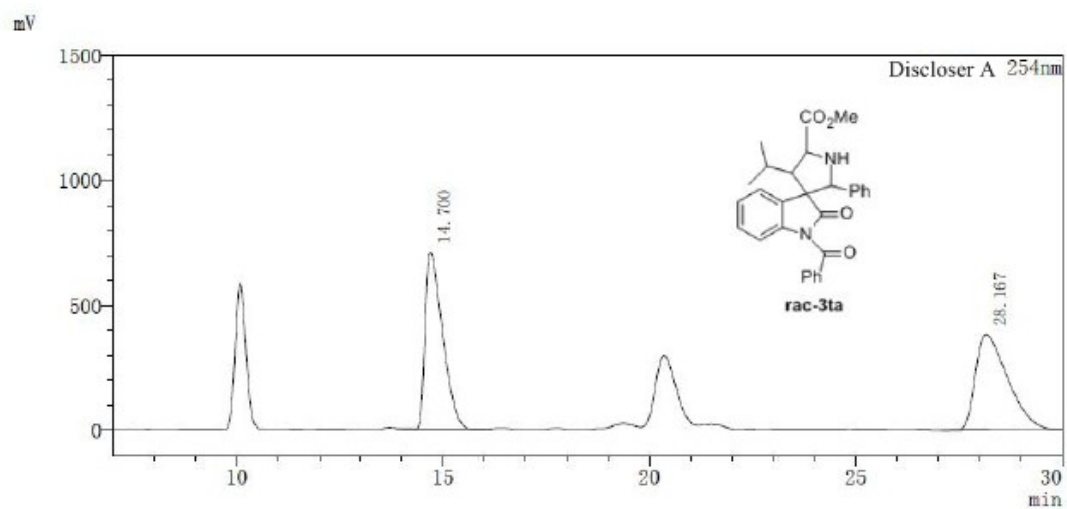

Discloser A 254 nm

| Peak  | Reten time (min) | Area (%) |
|-------|------------------|----------|
| 1     | 14.700           | 49.903   |
| 2     | 28.167           | 50.097   |
| Total |                  | 100.000  |

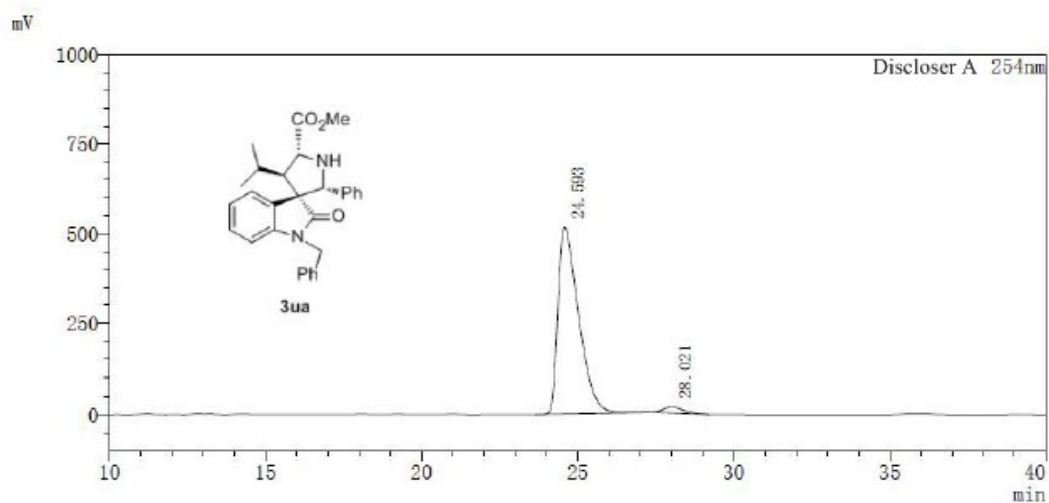

Discloser A 254 nm

| Peak  | Reten time (min) | Area (%) |
|-------|------------------|----------|
| 1     | 24.593           | 96.998   |
| 2     | 28.021           | 3.002    |
| Total |                  | 100.000  |

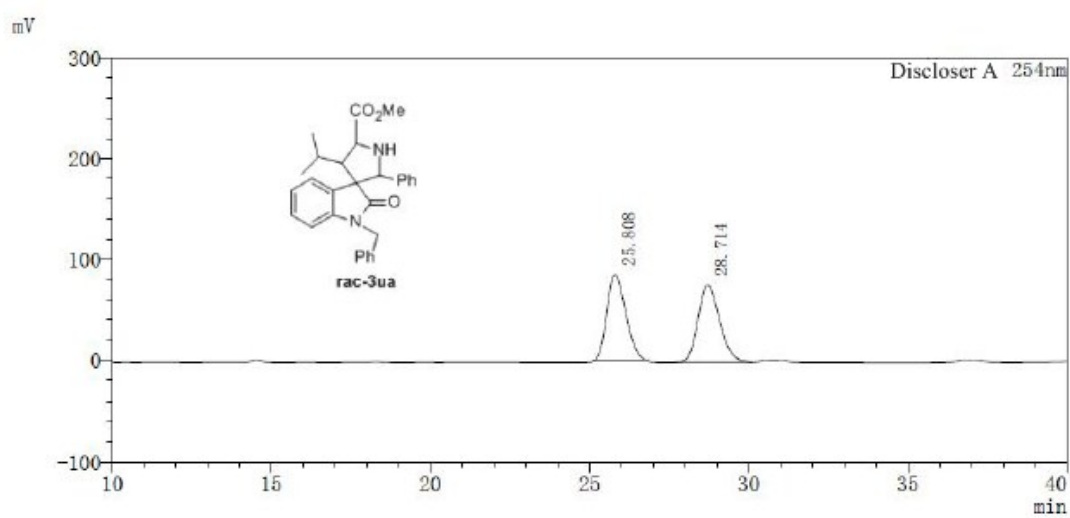

Discloser A 254 nm

| Peak  | Reten time (min) | Area (%) |
|-------|------------------|----------|
| 1     | 25.808           | 49.512   |
| 2     | 28.714           | 50.488   |
| Total |                  | 100.000  |

## 9. X-ray crystal structures

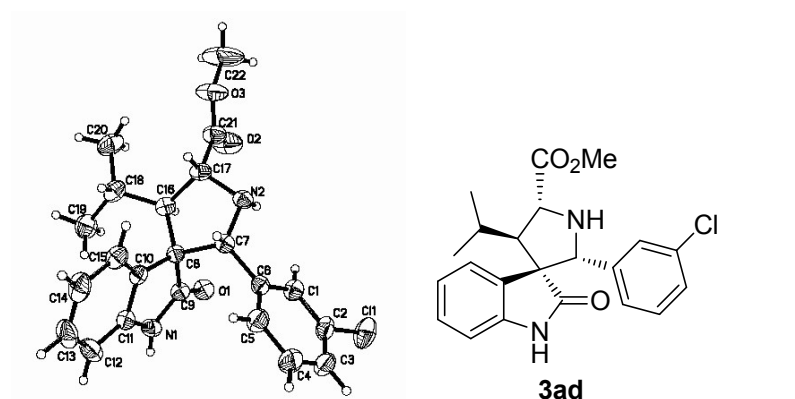

**Table S3 Crystal data and structure refinement for 3ad (CCDC 1955469).**

|                       |                                                                 |
|-----------------------|-----------------------------------------------------------------|
| Identification code   | 201909229                                                       |
| Empirical formula     | C <sub>22</sub> H <sub>23</sub> ClN <sub>2</sub> O <sub>3</sub> |
| Formula weight        | 398.87                                                          |
| Temperature/K         | 293(2)                                                          |
| Crystal system        | monoclinic                                                      |
| Space group           | C2                                                              |
| a/Å                   | 24.1998(14)                                                     |
| b/Å                   | 12.3700(6)                                                      |
| c/Å                   | 9.5879(6)                                                       |
| $\alpha$ /°           | 90                                                              |
| $\beta$ /°            | 119.944(8)                                                      |
| $\gamma$ /°           | 90                                                              |
| Volume/Å <sup>3</sup> | 2487.0(3)                                                       |
| Z                     | 4                                                               |

|                                                |                                                               |
|------------------------------------------------|---------------------------------------------------------------|
| $\rho_{\text{calc}}/\text{cm}^3$               | 1.065                                                         |
| $\mu/\text{mm}^{-1}$                           | 1.526                                                         |
| F(000)                                         | 840.0                                                         |
| Crystal size/ $\text{mm}^3$                    | $0.17 \times 0.12 \times 0.09$                                |
| Radiation                                      | CuK $\alpha$ ( $\lambda = 1.54184$ )                          |
| $2\Theta$ range for data collection/ $^\circ$  | 8.434 to 134.126                                              |
| Index ranges                                   | $-28 \leq h \leq 28, -13 \leq k \leq 14, -11 \leq l \leq 11$  |
| Reflections collected                          | 17070                                                         |
| Independent reflections                        | 4120 [ $R_{\text{int}} = 0.0281, R_{\text{sigma}} = 0.0257$ ] |
| Data/restraints/parameters                     | 4120/3/264                                                    |
| Goodness-of-fit on $F^2$                       | 1.050                                                         |
| Final R indexes [ $I \geq 2\sigma(I)$ ]        | $R_1 = 0.0448, wR_2 = 0.1259$                                 |
| Final R indexes [all data]                     | $R_1 = 0.0472, wR_2 = 0.1292$                                 |
| Largest diff. peak/hole / $e \text{ \AA}^{-3}$ | 0.25/-0.20                                                    |
| Flack parameter                                | 0.000(18)                                                     |

## 10. Energy, geometrical coordinates and vibrational frequencies of the optimized structures R1

Zero-point correction= 0.871945

Thermal correction to Energy= 0.924878

Thermal correction to Enthalpy= 0.925822

Thermal correction to Gibbs Free Energy= 0.785236

Sum of electronic and zero-point Energies= -4460.003288

Sum of electronic and thermal Energies= -4459.950355

Sum of electronic and thermal Enthalpies= -4459.949410

Sum of electronic and thermal Free Energies= -4460.089997

Cartesian coordinates

|   |           |           |           |
|---|-----------|-----------|-----------|
| C | 0.477545  | 0.182237  | 0.750986  |
| C | 0.357149  | -0.486473 | 3.053787  |
| C | 1.175078  | 0.165783  | 1.902161  |
| C | -1.057793 | 0.065939  | 2.794491  |
| H | -1.809325 | -0.373092 | 3.457892  |
| H | -1.102396 | 1.158380  | 2.856650  |
| C | -0.618231 | -2.197991 | 1.665534  |
| C | 0.211103  | -1.985575 | 2.713603  |
| C | 0.884841  | -0.193839 | 4.445039  |
| H | 1.899397  | -0.576362 | 4.596801  |
| H | 0.914409  | 0.885776  | 4.624429  |
| H | 0.238902  | -0.642224 | 5.206222  |
| C | 1.033155  | -2.986526 | 3.445962  |
| H | 0.615229  | -3.212373 | 4.435510  |
| H | 1.116788  | -3.930149 | 2.900906  |
| H | 2.043952  | -2.601756 | 3.627613  |
| C | -0.960819 | -3.443505 | 0.984847  |
| C | -1.189555 | -3.440266 | -0.402922 |
| C | -1.086776 | -4.667099 | 1.667907  |
| C | -1.492895 | -4.612090 | -1.085083 |
| H | -1.141119 | -2.497812 | -0.945864 |
| C | -1.392227 | -5.838754 | 0.983189  |
| H | -0.973613 | -4.690369 | 2.748191  |
| C | -1.589561 | -5.819936 | -0.396511 |
| H | -1.663420 | -4.578248 | -2.158436 |
| H | -1.488579 | -6.771188 | 1.533585  |

|   |           |           |           |
|---|-----------|-----------|-----------|
| H | -1.830711 | -6.736325 | -0.928257 |
| P | -1.200093 | -0.535663 | 1.062766  |
| C | 2.554237  | 0.633675  | 2.127804  |
| C | 2.849254  | 2.002697  | 2.143523  |
| C | 3.592583  | -0.281517 | 2.347235  |
| C | 4.152700  | 2.446117  | 2.352288  |
| H | 2.046268  | 2.721130  | 1.987110  |
| C | 4.895572  | 0.162327  | 2.545591  |
| H | 3.376392  | -1.348104 | 2.326452  |
| C | 5.181282  | 1.527162  | 2.546470  |
| H | 4.365064  | 3.511971  | 2.356915  |
| H | 5.690959  | -0.562058 | 2.699656  |
| H | 6.200667  | 1.870912  | 2.701275  |
| C | 0.886692  | 0.549654  | -0.650427 |
| H | 0.314066  | -0.121570 | -1.308803 |
| C | 2.353910  | 0.318630  | -0.939718 |
| C | 2.815172  | -0.999685 | -1.022923 |
| C | 3.277263  | 1.349229  | -1.079540 |
| C | 4.162905  | -1.270872 | -1.209880 |
| H | 2.104766  | -1.820686 | -0.921888 |
| C | 4.633049  | 1.072902  | -1.255235 |
| H | 2.937530  | 2.381010  | -1.026390 |
| C | 5.108723  | -0.238942 | -1.314281 |
| H | 4.488848  | -2.307457 | -1.269617 |
| H | 5.324666  | 1.906628  | -1.334565 |
| N | 0.443918  | 1.928351  | -0.978543 |
| H | 0.299625  | 2.484799  | -0.140464 |
| S | -0.885536 | 2.177929  | -2.007095 |
| O | -1.854165 | 0.993474  | -1.940040 |

|    |           |           |           |
|----|-----------|-----------|-----------|
| C  | -0.097034 | 1.975336  | -3.697657 |
| C  | -1.232471 | 2.317671  | -4.655496 |
| H  | -0.861264 | 2.269992  | -5.684000 |
| H  | -2.060830 | 1.610090  | -4.561883 |
| H  | -1.619601 | 3.328703  | -4.488831 |
| C  | 0.371271  | 0.547798  | -3.903788 |
| H  | -0.408434 | -0.169403 | -3.626886 |
| H  | 0.599313  | 0.397234  | -4.964504 |
| H  | 1.281363  | 0.326513  | -3.338528 |
| C  | 1.034811  | 2.981424  | -3.791491 |
| H  | 1.416822  | 2.995365  | -4.817796 |
| H  | 0.702702  | 3.997882  | -3.551870 |
| H  | 1.861099  | 2.719632  | -3.124462 |
| C  | 6.588076  | -0.577628 | -1.490617 |
| C  | 7.045783  | -1.493441 | -0.347930 |
| H  | 8.104240  | -1.751913 | -0.467275 |
| H  | 6.928360  | -1.000275 | 0.623296  |
| H  | 6.479217  | -2.429745 | -0.317151 |
| C  | 7.467260  | 0.671299  | -1.479857 |
| H  | 8.519267  | 0.386285  | -1.585909 |
| H  | 7.227408  | 1.351983  | -2.303507 |
| H  | 7.366945  | 1.227109  | -0.540158 |
| C  | 6.779726  | -1.307778 | -2.826192 |
| H  | 6.200499  | -2.236420 | -2.864448 |
| H  | 6.464232  | -0.683589 | -3.669448 |
| H  | 7.834131  | -1.566899 | -2.977237 |
| Cu | -2.692148 | -0.054128 | -0.324996 |
| C  | -4.959396 | 1.720924  | 0.713443  |
| H  | -6.032756 | 1.847345  | 0.898284  |



|   |           |           |           |
|---|-----------|-----------|-----------|
| N | -4.555314 | 0.682200  | 0.012882  |
| C | -5.448682 | -0.189047 | -0.523539 |
| C | -4.919757 | -1.260303 | -1.260300 |
| O | -3.691094 | -1.456914 | -1.463526 |
| O | -5.847486 | -2.109637 | -1.773882 |
| C | -5.318091 | -3.224357 | -2.483539 |
| H | -4.728466 | -3.872396 | -1.826735 |
| H | -6.180353 | -3.774777 | -2.861723 |
| H | -4.685248 | -2.908962 | -3.318546 |
| C | -4.089995 | 2.730873  | 1.257405  |
| C | -4.633282 | 3.729182  | 2.095188  |
| C | -2.706751 | 2.796438  | 0.985540  |
| C | -3.836312 | 4.726893  | 2.638695  |
| H | -5.699276 | 3.704961  | 2.314905  |
| C | -1.914683 | 3.793240  | 1.534810  |
| H | -2.279460 | 2.039015  | 0.332155  |
| C | -2.467343 | 4.768292  | 2.367830  |
| H | -4.284641 | 5.479805  | 3.282568  |
| H | -0.849876 | 3.820740  | 1.306837  |
| H | -1.843730 | 5.550392  | 2.791482  |
| H | -6.520935 | -0.061545 | -0.385839 |

Vibrational frequencies

|         |          |          |
|---------|----------|----------|
| 12.8807 | 15.7056  | 23.1477  |
| 28.4358 | 33.7473  | 37.8047  |
| 42.2244 | 51.0325  | 53.9785  |
| 56.0026 | 60.1946  | 67.0103  |
| 69.4935 | 73.2860  | 79.7877  |
| 81.8937 | 86.5359  | 88.2684  |
| 95.4657 | 104.4766 | 113.4181 |

|          |          |          |
|----------|----------|----------|
| 120.2250 | 128.9712 | 132.6633 |
| 135.1942 | 143.9172 | 150.6084 |
| 159.8327 | 168.2484 | 178.2821 |
| 181.5508 | 189.4131 | 198.5504 |
| 199.8648 | 204.3080 | 221.5637 |
| 225.8263 | 228.1745 | 238.5763 |
| 240.6375 | 246.5607 | 250.3086 |
| 254.9633 | 261.9192 | 267.4012 |
| 273.0511 | 274.6641 | 281.8768 |
| 288.6761 | 291.0226 | 304.7014 |
| 305.9194 | 317.9791 | 324.0421 |
| 329.3780 | 335.0063 | 341.2551 |
| 349.1930 | 353.3309 | 360.2731 |
| 375.3434 | 378.0237 | 379.3887 |
| 384.7669 | 391.0467 | 402.9286 |
| 411.6398 | 414.2785 | 415.8508 |
| 424.8103 | 427.1935 | 430.5171 |
| 432.5528 | 434.9952 | 458.4146 |
| 473.5496 | 479.3620 | 485.6954 |
| 492.2861 | 507.0678 | 512.5963 |
| 518.6914 | 535.0228 | 546.8851 |
| 555.1385 | 560.1063 | 565.3495 |
| 575.1507 | 582.1852 | 614.6791 |
| 616.0047 | 625.8350 | 628.4243 |
| 637.3345 | 637.8273 | 651.2389 |
| 658.1742 | 666.1526 | 692.6941 |
| 700.2339 | 706.4636 | 713.8831 |
| 715.5126 | 718.7400 | 719.1155 |
| 722.5161 | 739.1402 | 748.9065 |

|           |           |           |
|-----------|-----------|-----------|
| 762.2214  | 764.9010  | 768.1833  |
| 770.6951  | 806.8805  | 818.2989  |
| 819.7400  | 832.9454  | 846.1357  |
| 847.9023  | 848.5568  | 857.0913  |
| 864.5627  | 865.0380  | 870.8615  |
| 871.4370  | 898.5095  | 903.0723  |
| 912.8002  | 916.3421  | 916.7315  |
| 924.1072  | 934.9190  | 938.3742  |
| 947.7614  | 952.1586  | 952.8975  |
| 956.2293  | 962.9608  | 964.9704  |
| 965.6923  | 968.8833  | 972.5343  |
| 973.1718  | 987.8590  | 989.6637  |
| 992.9386  | 996.3814  | 1009.7469 |
| 1013.3587 | 1014.7227 | 1016.3936 |
| 1022.1159 | 1022.5753 | 1030.9484 |
| 1031.7880 | 1033.9350 | 1040.4127 |
| 1043.2318 | 1046.8731 | 1053.0225 |
| 1055.9394 | 1056.5578 | 1061.1064 |
| 1061.2420 | 1080.6362 | 1098.1716 |
| 1102.9217 | 1110.3726 | 1111.1280 |
| 1121.7700 | 1134.3717 | 1136.2128 |
| 1161.3161 | 1166.1279 | 1166.7789 |
| 1166.8189 | 1167.9045 | 1184.6081 |
| 1186.7069 | 1195.0499 | 1196.5761 |
| 1197.2656 | 1197.8639 | 1203.8791 |
| 1207.7997 | 1214.9145 | 1231.9480 |
| 1234.5368 | 1242.0336 | 1242.5044 |
| 1253.2532 | 1268.5699 | 1271.5217 |
| 1296.8759 | 1297.2844 | 1298.1558 |

|           |           |           |
|-----------|-----------|-----------|
| 1313.6664 | 1319.8848 | 1326.6498 |
| 1332.7859 | 1336.3785 | 1342.7438 |
| 1345.7595 | 1372.8702 | 1377.8648 |
| 1379.7592 | 1382.2478 | 1385.8848 |
| 1388.2460 | 1391.8824 | 1396.2138 |
| 1398.2871 | 1399.9888 | 1402.9488 |
| 1407.2050 | 1418.1299 | 1439.6862 |
| 1440.4666 | 1443.7320 | 1457.6848 |
| 1458.7907 | 1460.0555 | 1463.4429 |
| 1464.0587 | 1464.9185 | 1467.7056 |
| 1469.4844 | 1469.8996 | 1470.5381 |
| 1472.7792 | 1474.9052 | 1475.5298 |
| 1476.1543 | 1476.8212 | 1481.7872 |
| 1483.6638 | 1487.0346 | 1492.6995 |
| 1492.9780 | 1493.8212 | 1500.8631 |
| 1506.4846 | 1525.5693 | 1526.5140 |
| 1531.8112 | 1546.2038 | 1562.5874 |
| 1614.5098 | 1623.0467 | 1625.3199 |
| 1628.6407 | 1646.9519 | 1654.4809 |
| 1656.9929 | 1665.1544 | 1668.8797 |
| 1669.4177 | 1693.2941 | 3038.6336 |
| 3045.1207 | 3049.5583 | 3051.8135 |
| 3051.9737 | 3056.5754 | 3057.8274 |
| 3059.1210 | 3059.6435 | 3061.8207 |
| 3084.5959 | 3087.6499 | 3124.5042 |
| 3139.0610 | 3139.6806 | 3141.1433 |
| 3146.4921 | 3148.8655 | 3149.5317 |
| 3150.6644 | 3152.0083 | 3152.2007 |
| 3152.4047 | 3152.6874 | 3158.6258 |

|           |           |           |
|-----------|-----------|-----------|
| 3162.3913 | 3167.3740 | 3167.9094 |
| 3168.2104 | 3169.8496 | 3171.1655 |
| 3175.2670 | 3175.9528 | 3177.4235 |
| 3177.4509 | 3180.2550 | 3184.2681 |
| 3189.6641 | 3191.1912 | 3193.7792 |
| 3194.3831 | 3197.0115 | 3198.1221 |
| 3198.3790 | 3198.4608 | 3202.0996 |
| 3207.6261 | 3216.8805 | 3217.2372 |
| 3217.5414 | 3217.6224 | 3564.2444 |

## R2

Zero-point correction= 0.224402

Thermal correction to Energy= 0.236859

Thermal correction to Enthalpy= 0.237803

Thermal correction to Gibbs Free Energy= 0.185826

Sum of electronic and zero-point Energies= -594.840001

Sum of electronic and thermal Energies= -594.827545

Sum of electronic and thermal Enthalpies= -594.826601

Sum of electronic and thermal Free Energies= -594.878578

Cartesian coordinates

|   |           |           |           |
|---|-----------|-----------|-----------|
| C | -1.891257 | 0.489778  | -0.016976 |
| C | -0.695578 | -0.263812 | -0.058820 |
| C | -0.775898 | -1.653915 | -0.108429 |
| C | -2.031476 | -2.266354 | -0.136749 |
| C | -3.196225 | -1.500043 | -0.106825 |
| C | -3.142836 | -0.105434 | -0.041353 |
| C | -0.209132 | 2.053202  | 0.077451  |
| C | 0.407253  | 0.690386  | -0.017387 |
| H | 0.121783  | -2.265271 | -0.115988 |

|   |           |           |           |
|---|-----------|-----------|-----------|
| H | -2.099067 | -3.349361 | -0.177255 |
| H | -4.164822 | -1.992232 | -0.127364 |
| H | -4.048678 | 0.492693  | -0.008906 |
| O | 0.345186  | 3.141035  | 0.145947  |
| N | -1.576929 | 1.841943  | 0.058493  |
| C | 1.745327  | 0.547746  | -0.073591 |
| H | 2.322691  | 1.473529  | -0.009215 |
| C | 2.514827  | -0.727598 | -0.192557 |
| H | 1.938866  | -1.420452 | -0.822063 |
| C | 2.674791  | -1.376130 | 1.186963  |
| H | 3.208916  | -2.328618 | 1.105397  |
| H | 3.249204  | -0.727823 | 1.857626  |
| H | 1.704872  | -1.568060 | 1.656604  |
| C | 3.870549  | -0.492678 | -0.846547 |
| H | 4.419159  | -1.432687 | -0.961587 |
| H | 3.769638  | -0.040658 | -1.838106 |
| H | 4.486628  | 0.178035  | -0.236498 |
| H | -2.254244 | 2.588136  | 0.109246  |

Vibrational frequencies

|          |          |          |
|----------|----------|----------|
| 53.8357  | 86.4030  | 107.2821 |
| 127.9128 | 149.7500 | 232.4101 |
| 252.8081 | 260.8507 | 270.9847 |
| 305.5839 | 349.7837 | 383.0777 |
| 417.2738 | 422.2194 | 482.1674 |
| 502.0613 | 529.3505 | 592.9270 |
| 599.8555 | 632.2863 | 678.8152 |
| 734.2257 | 757.3911 | 760.7563 |
| 788.5106 | 862.3648 | 865.2899 |
| 896.4909 | 906.2556 | 929.8143 |

|           |           |           |
|-----------|-----------|-----------|
| 930.4665  | 967.6863  | 978.7197  |
| 979.9927  | 999.6872  | 1057.2688 |
| 1118.8672 | 1132.3731 | 1157.1160 |
| 1171.2440 | 1196.1151 | 1206.9183 |
| 1229.1559 | 1267.7348 | 1299.7262 |
| 1319.4821 | 1345.9577 | 1370.4913 |
| 1380.5564 | 1395.1481 | 1407.6604 |
| 1445.9610 | 1464.4009 | 1469.2434 |
| 1480.0891 | 1486.7194 | 1506.6475 |
| 1522.2724 | 1648.5952 | 1675.4839 |
| 1730.5435 | 1824.4846 | 3048.7498 |
| 3052.1702 | 3059.4344 | 3138.3592 |
| 3148.9180 | 3149.1689 | 3153.1326 |
| 3155.8466 | 3194.6069 | 3198.6179 |
| 3210.0443 | 3224.6195 | 3662.0621 |

### PreR

Zero-point correction= 1.097339

Thermal correction to Energy= 1.163651

Thermal correction to Enthalpy= 1.164596

Thermal correction to Gibbs Free Energy= 0.997280

Sum of electronic and zero-point Energies= -5054.865591

Sum of electronic and thermal Energies= -5054.799279

Sum of electronic and thermal Enthalpies= -5054.798334

Sum of electronic and thermal Free Energies= -5054.965650

Cartesian coordinates

|   |          |           |           |
|---|----------|-----------|-----------|
| C | 1.551942 | -0.232167 | -0.639162 |
| C | 1.200544 | 0.572412  | -2.871577 |
| C | 2.090054 | -0.221730 | -1.874574 |

|   |           |           |           |
|---|-----------|-----------|-----------|
| C | -0.214029 | 0.124456  | -2.452731 |
| H | -1.007411 | 0.644729  | -2.996140 |
| H | -0.368073 | -0.954770 | -2.548344 |
| C | 0.574532  | 2.278919  | -1.284192 |
| C | 1.240552  | 2.054902  | -2.440481 |
| C | 1.508997  | 0.325602  | -4.335730 |
| H | 2.522366  | 0.635731  | -4.610214 |
| H | 1.419119  | -0.739105 | -4.573439 |
| H | 0.807220  | 0.870572  | -4.974757 |
| C | 2.056115  | 3.024523  | -3.219854 |
| H | 1.543598  | 3.346847  | -4.135549 |
| H | 2.294436  | 3.921850  | -2.643315 |
| H | 2.997833  | 2.568978  | -3.547633 |
| C | 0.435115  | 3.505228  | -0.504179 |
| C | 0.345292  | 3.434986  | 0.897472  |
| C | 0.327485  | 4.771868  | -1.106485 |
| C | 0.182379  | 4.580515  | 1.666730  |
| H | 0.372060  | 2.460973  | 1.382457  |
| C | 0.164263  | 5.917793  | -0.334965 |
| H | 0.329450  | 4.850146  | -2.190365 |
| C | 0.095328  | 5.830086  | 1.054553  |
| H | 0.110507  | 4.493319  | 2.748064  |
| H | 0.073549  | 6.884357  | -0.824032 |
| H | -0.039557 | 6.726739  | 1.653520  |
| P | -0.078762 | 0.640965  | -0.694441 |
| C | 3.353043  | -0.854482 | -2.288046 |
| C | 3.485065  | -2.248269 | -2.218652 |
| C | 4.442541  | -0.100471 | -2.748321 |
| C | 4.673310  | -2.872096 | -2.587380 |



|   |           |           |           |
|---|-----------|-----------|-----------|
| H | 2.642110  | -2.841965 | -1.869277 |
| C | 5.635220  | -0.723851 | -3.101171 |
| H | 4.361874  | 0.984089  | -2.792998 |
| C | 5.755177  | -2.110777 | -3.022970 |
| H | 4.755298  | -3.954036 | -2.526930 |
| H | 6.474755  | -0.123059 | -3.440666 |
| H | 6.686639  | -2.594852 | -3.304126 |
| C | 2.150070  | -0.669110 | 0.673550  |
| H | 1.696645  | -0.011530 | 1.431524  |
| C | 3.645426  | -0.446675 | 0.738560  |
| C | 4.106386  | 0.874399  | 0.742711  |
| C | 4.584098  | -1.472244 | 0.748405  |
| C | 5.464364  | 1.154478  | 0.719539  |
| H | 3.382917  | 1.690296  | 0.745201  |
| C | 5.949670  | -1.186818 | 0.710505  |
| H | 4.245776  | -2.505931 | 0.750303  |
| C | 6.420867  | 0.127088  | 0.681555  |
| H | 5.789863  | 2.192930  | 0.722067  |
| H | 6.649807  | -2.016995 | 0.687124  |
| N | 1.740318  | -2.048915 | 1.031269  |
| H | 1.427033  | -2.569145 | 0.215621  |
| S | 0.549337  | -2.245445 | 2.241722  |
| O | -0.283443 | -0.968959 | 2.357606  |
| C | 1.601402  | -2.205066 | 3.792882  |
| C | 0.594224  | -2.425405 | 4.915597  |
| H | 1.126908  | -2.473342 | 5.870739  |
| H | -0.128964 | -1.607296 | 4.971031  |
| H | 0.044743  | -3.365620 | 4.795402  |
| C | 2.290335  | -0.862310 | 3.937759  |

|    |           |           |           |
|----|-----------|-----------|-----------|
| H  | 1.582847  | -0.036449 | 3.807051  |
| H  | 2.709712  | -0.782986 | 4.946407  |
| H  | 3.115726  | -0.744660 | 3.229548  |
| C  | 2.584222  | -3.357185 | 3.693237  |
| H  | 3.141284  | -3.437351 | 4.632721  |
| H  | 2.077648  | -4.314675 | 3.529529  |
| H  | 3.303368  | -3.202431 | 2.883925  |
| C  | 7.907029  | 0.475423  | 0.615379  |
| C  | 8.164471  | 1.399065  | -0.581972 |
| H  | 9.226594  | 1.663494  | -0.637977 |
| H  | 7.889486  | 0.911644  | -1.523602 |
| H  | 7.596958  | 2.332199  | -0.511319 |
| C  | 8.780554  | -0.766921 | 0.452426  |
| H  | 9.833304  | -0.474234 | 0.377665  |
| H  | 8.692118  | -1.451275 | 1.303109  |
| H  | 8.525862  | -1.324192 | -0.456662 |
| C  | 8.314723  | 1.203873  | 1.901878  |
| H  | 7.736122  | 2.122848  | 2.044759  |
| H  | 8.160760  | 0.572518  | 2.783887  |
| H  | 9.374985  | 1.480458  | 1.868688  |
| Cu | -1.336940 | 0.195731  | 0.921024  |
| C  | -3.614610 | -1.867673 | 0.902395  |
| H  | -4.637055 | -2.129493 | 1.203468  |
| N  | -3.132714 | -0.701317 | 1.272385  |
| C  | -3.884127 | 0.150962  | 2.014771  |
| C  | -3.263283 | 1.338690  | 2.432977  |
| O  | -2.052901 | 1.629457  | 2.229574  |
| O  | -4.068831 | 2.196937  | 3.113153  |
| C  | -3.435920 | 3.397808  | 3.546011  |

|   |           |           |           |
|---|-----------|-----------|-----------|
| H | -3.022786 | 3.960714  | 2.702752  |
| H | -4.212585 | 3.984029  | 4.038675  |
| H | -2.625757 | 3.192769  | 4.252748  |
| C | -2.921242 | -2.842487 | 0.100212  |
| C | -3.619659 | -4.001248 | -0.302767 |
| C | -1.587485 | -2.706094 | -0.338921 |
| C | -3.027248 | -4.955755 | -1.117703 |
| H | -4.651139 | -4.127599 | 0.025298  |
| C | -1.002786 | -3.658147 | -1.160999 |
| H | -1.029933 | -1.827311 | -0.021649 |
| C | -1.713697 | -4.790812 | -1.562547 |
| H | -3.594116 | -5.835261 | -1.413899 |
| H | 0.024111  | -3.514758 | -1.496936 |
| H | -1.251339 | -5.534814 | -2.205352 |
| C | -6.078073 | -1.526447 | -1.381601 |
| C | -5.842512 | -0.213460 | -0.908662 |
| C | -6.719193 | 0.334577  | 0.024797  |
| C | -7.798399 | -0.429755 | 0.480534  |
| C | -8.003902 | -1.724767 | 0.005296  |
| C | -7.143773 | -2.294128 | -0.938472 |
| C | -4.153733 | -0.856881 | -2.437050 |
| C | -4.622569 | 0.254622  | -1.552590 |
| H | -6.572968 | 1.343484  | 0.401651  |
| H | -8.483974 | -0.008213 | 1.209630  |
| H | -8.848914 | -2.303348 | 0.369142  |
| H | -7.301882 | -3.301908 | -1.312286 |
| H | -4.980499 | -2.776353 | -2.716005 |
| O | -3.171035 | -0.901145 | -3.165151 |
| N | -5.093517 | -1.863427 | -2.301235 |

|   |           |           |           |
|---|-----------|-----------|-----------|
| C | -3.919097 | 1.401036  | -1.462260 |
| H | -3.015239 | 1.446933  | -2.077389 |
| C | -4.269320 | 2.630306  | -0.685254 |
| H | -4.684225 | 2.321645  | 0.285217  |
| C | -5.347918 | 3.426209  | -1.427115 |
| H | -5.638679 | 4.311222  | -0.851345 |
| H | -4.980924 | 3.768598  | -2.401255 |
| H | -6.245730 | 2.824466  | -1.601840 |
| C | -3.028136 | 3.475215  | -0.437896 |
| H | -3.267962 | 4.391550  | 0.112903  |
| H | -2.279172 | 2.921731  | 0.137891  |
| H | -2.571021 | 3.775016  | -1.389895 |
| H | -4.915628 | -0.081050 | 2.275718  |

Vibrational frequencies

|          |          |          |
|----------|----------|----------|
| -6.6808  | 18.3567  | 21.6328  |
| 25.5081  | 29.0534  | 31.8122  |
| 37.8198  | 41.0314  | 44.7743  |
| 46.4595  | 49.8981  | 53.6084  |
| 54.4116  | 57.9727  | 65.9278  |
| 68.9044  | 69.3851  | 73.7518  |
| 74.7053  | 78.2076  | 81.1806  |
| 82.0456  | 87.7372  | 91.1835  |
| 93.2278  | 98.9854  | 101.6001 |
| 107.6682 | 114.6650 | 119.0910 |
| 122.9041 | 124.6428 | 132.4805 |
| 140.7409 | 148.6058 | 151.0931 |
| 155.1636 | 159.5638 | 165.4972 |
| 167.8919 | 171.3952 | 177.5719 |
| 183.5870 | 189.8180 | 199.7815 |

|          |          |          |
|----------|----------|----------|
| 202.4352 | 212.2432 | 214.6719 |
| 219.8552 | 224.4074 | 237.9655 |
| 238.7025 | 246.0970 | 252.2181 |
| 254.8421 | 255.8517 | 256.5088 |
| 263.9624 | 268.0596 | 272.3267 |
| 274.2647 | 283.3198 | 285.5341 |
| 287.9234 | 301.0479 | 307.3947 |
| 319.6655 | 323.2176 | 326.7400 |
| 327.8454 | 329.7475 | 332.4102 |
| 333.0745 | 337.8023 | 341.3761 |
| 345.9008 | 356.1791 | 360.5412 |
| 365.0544 | 371.7614 | 373.6330 |
| 384.4420 | 393.1330 | 408.4734 |
| 411.8795 | 414.2258 | 422.0198 |
| 423.0104 | 424.4034 | 425.8503 |
| 429.1761 | 431.1779 | 436.3711 |
| 440.5868 | 455.8549 | 472.0130 |
| 481.6169 | 487.9950 | 493.4688 |
| 503.3414 | 507.6094 | 507.9042 |
| 512.7205 | 526.0925 | 531.0663 |
| 548.1737 | 558.3715 | 559.3849 |
| 565.7345 | 579.7804 | 582.9247 |
| 594.9154 | 597.7695 | 608.5670 |
| 610.9650 | 617.8282 | 628.3283 |
| 630.1516 | 636.0460 | 637.2353 |
| 639.9194 | 652.8214 | 660.1129 |
| 667.7728 | 681.8163 | 701.5868 |
| 706.4972 | 707.2440 | 711.6339 |
| 716.3439 | 720.5492 | 721.5212 |

|           |           |           |
|-----------|-----------|-----------|
| 723.5948  | 733.2643  | 735.9235  |
| 752.6696  | 756.1066  | 761.8257  |
| 766.1433  | 767.2986  | 768.8595  |
| 772.7843  | 787.6478  | 811.3730  |
| 818.1061  | 819.8589  | 838.0254  |
| 842.6769  | 850.3434  | 855.1981  |
| 856.3715  | 859.3436  | 862.6356  |
| 865.3432  | 866.2076  | 871.5816  |
| 895.7672  | 898.4099  | 900.5824  |
| 903.4418  | 906.4864  | 909.8326  |
| 914.6314  | 918.0947  | 919.2787  |
| 922.9541  | 933.4932  | 939.8750  |
| 940.3874  | 946.5626  | 952.3368  |
| 952.7721  | 958.9477  | 961.4005  |
| 963.3419  | 964.4901  | 968.2342  |
| 969.6220  | 974.5024  | 976.4720  |
| 983.6774  | 987.6230  | 990.4577  |
| 990.8955  | 992.9561  | 996.8610  |
| 1002.2521 | 1012.2341 | 1014.5102 |
| 1015.0490 | 1017.1289 | 1021.5699 |
| 1031.9889 | 1033.0129 | 1034.8404 |
| 1038.9698 | 1039.7242 | 1042.3643 |
| 1044.3851 | 1051.2916 | 1052.7481 |
| 1055.8728 | 1056.3794 | 1059.7872 |
| 1063.0316 | 1077.5354 | 1096.9958 |
| 1103.9380 | 1112.6405 | 1113.8896 |
| 1116.4012 | 1117.3146 | 1128.4843 |
| 1134.0547 | 1140.0201 | 1157.0805 |
| 1157.9897 | 1164.6448 | 1167.3983 |

|           |           |           |
|-----------|-----------|-----------|
| 1167.4806 | 1169.9873 | 1173.6446 |
| 1178.7394 | 1190.2164 | 1192.6244 |
| 1192.7968 | 1192.8144 | 1195.1701 |
| 1197.4486 | 1199.2458 | 1202.7243 |
| 1207.9506 | 1218.2330 | 1232.1757 |
| 1232.6015 | 1234.5119 | 1239.3167 |
| 1240.3144 | 1254.7046 | 1269.3043 |
| 1269.9032 | 1270.7645 | 1292.7410 |
| 1296.4848 | 1298.5325 | 1300.8096 |
| 1310.0450 | 1316.9588 | 1318.6217 |
| 1324.2383 | 1328.2446 | 1341.7603 |
| 1345.3197 | 1347.1639 | 1350.1880 |
| 1373.1306 | 1375.2622 | 1376.8455 |
| 1380.9312 | 1380.9847 | 1383.8084 |
| 1384.1887 | 1387.3167 | 1390.3021 |
| 1392.7551 | 1393.4941 | 1395.0663 |
| 1395.9556 | 1401.9348 | 1405.9114 |
| 1411.1495 | 1411.6767 | 1433.2089 |
| 1435.8501 | 1443.7533 | 1449.1798 |
| 1450.3834 | 1453.4686 | 1454.0707 |
| 1457.1938 | 1458.6527 | 1461.5179 |
| 1464.8765 | 1464.9784 | 1466.6037 |
| 1467.6591 | 1468.7559 | 1470.3505 |
| 1470.8648 | 1471.7015 | 1471.9641 |
| 1474.7644 | 1478.0078 | 1478.6984 |
| 1479.3613 | 1481.3511 | 1481.6772 |
| 1481.8756 | 1490.2336 | 1491.9066 |
| 1495.6037 | 1497.1142 | 1502.8721 |
| 1504.6521 | 1521.9055 | 1524.4796 |

|           |           |           |
|-----------|-----------|-----------|
| 1528.3158 | 1528.6374 | 1543.7937 |
| 1562.9674 | 1616.6029 | 1623.1675 |
| 1627.1921 | 1627.2329 | 1643.8222 |
| 1645.3295 | 1653.2042 | 1654.4943 |
| 1661.1237 | 1669.1630 | 1669.8675 |
| 1675.4132 | 1692.1977 | 1721.4134 |
| 1815.3889 | 3032.9247 | 3044.0025 |
| 3044.4756 | 3045.6395 | 3046.7690 |
| 3049.3692 | 3054.5030 | 3054.6222 |
| 3055.6822 | 3058.9664 | 3061.5087 |
| 3061.6112 | 3062.2698 | 3079.4650 |
| 3096.0865 | 3120.1826 | 3125.2521 |
| 3134.5599 | 3137.6698 | 3138.4841 |
| 3141.2777 | 3144.9773 | 3145.6019 |
| 3146.8249 | 3148.2650 | 3151.6816 |
| 3153.8061 | 3154.2179 | 3154.4107 |
| 3154.6713 | 3155.0246 | 3155.2880 |
| 3159.0143 | 3161.2294 | 3161.6103 |
| 3163.7313 | 3168.9593 | 3169.8155 |
| 3171.4202 | 3171.4999 | 3171.7785 |
| 3174.0560 | 3179.6279 | 3184.4089 |
| 3186.4521 | 3187.8357 | 3188.8170 |
| 3189.6006 | 3191.4827 | 3191.8718 |
| 3193.5399 | 3194.7493 | 3198.9448 |
| 3200.7089 | 3203.4150 | 3207.6536 |
| 3208.0188 | 3211.9531 | 3213.0336 |
| 3218.6900 | 3220.2466 | 3220.4645 |
| 3224.9295 | 3567.3463 | 3678.4951 |



## PreS

Zero-point correction= 1.098629

Thermal correction to Energy= 1.165153

Thermal correction to Enthalpy= 1.166097

Thermal correction to Gibbs Free Energy= 0.998294

Sum of electronic and zero-point Energies= -5054.851475

Sum of electronic and thermal Energies= -5054.784951

Sum of electronic and thermal Enthalpies= -5054.784006

Sum of electronic and thermal Free Energies= -5054.951810

### Cartesian coordinates

|   |           |           |           |
|---|-----------|-----------|-----------|
| C | -1.899403 | -1.070978 | -0.130579 |
| C | -2.553663 | -2.072771 | -2.226127 |
| C | -2.959992 | -1.464407 | -0.867656 |
| C | -1.336330 | -1.217347 | -2.615392 |
| H | -0.826726 | -1.581654 | -3.513331 |
| H | -1.596288 | -0.160286 | -2.741535 |
| C | -0.710984 | -3.337419 | -1.339379 |
| C | -1.931528 | -3.443596 | -1.914540 |
| C | -3.643969 | -2.103327 | -3.281474 |
| H | -4.533027 | -2.651718 | -2.954276 |
| H | -3.961729 | -1.089244 | -3.542397 |
| H | -3.273475 | -2.577247 | -4.196170 |
| C | -2.743366 | -4.671016 | -2.135584 |
| H | -2.793786 | -4.952057 | -3.195223 |
| H | -2.354421 | -5.529812 | -1.583974 |
| H | -3.779996 | -4.501144 | -1.818189 |
| C | 0.181707  | -4.417465 | -0.926743 |
| C | 0.232321  | -5.641122 | -1.622692 |
| C | 1.035474  | -4.252962 | 0.175686  |

|   |           |           |           |
|---|-----------|-----------|-----------|
| C | 1.059711  | -6.673477 | -1.194203 |
| H | -0.358373 | -5.771367 | -2.525341 |
| C | 1.856467  | -5.289231 | 0.605209  |
| H | 1.064446  | -3.290619 | 0.680503  |
| C | 1.866620  | -6.509314 | -0.069027 |
| H | 1.082786  | -7.607326 | -1.750292 |
| H | 2.502520  | -5.134145 | 1.467058  |
| H | 2.511935  | -7.317832 | 0.264965  |
| P | -0.354133 | -1.514262 | -1.082426 |
| C | -4.368577 | -1.443497 | -0.424382 |
| C | -5.315625 | -0.586021 | -1.002080 |
| C | -4.773983 | -2.285880 | 0.620563  |
| C | -6.625178 | -0.559613 | -0.532892 |
| H | -5.009818 | 0.089959  | -1.798080 |
| C | -6.088042 | -2.267396 | 1.080695  |
| H | -4.045486 | -2.960460 | 1.068150  |
| C | -7.015589 | -1.398695 | 0.509915  |
| H | -7.343538 | 0.123364  | -0.978940 |
| H | -6.385365 | -2.928161 | 1.890855  |
| H | -8.039223 | -1.376527 | 0.873628  |
| C | -2.033415 | -0.369318 | 1.211440  |
| H | -2.427620 | -1.075759 | 1.950585  |
| C | -3.020966 | 0.779064  | 1.109016  |
| C | -4.118884 | 0.875048  | 1.956875  |
| C | -2.838033 | 1.771421  | 0.139803  |
| C | -5.039683 | 1.913061  | 1.817118  |
| H | -4.282537 | 0.105184  | 2.709402  |
| C | -3.747090 | 2.811525  | 0.012846  |
| H | -1.980745 | 1.711232  | -0.532820 |

|   |           |           |           |
|---|-----------|-----------|-----------|
| C | -4.880913 | 2.896351  | 0.836960  |
| H | -5.901764 | 1.934698  | 2.477676  |
| H | -3.583210 | 3.566373  | -0.754781 |
| N | -0.824419 | 0.247217  | 1.801972  |
| H | -0.489364 | 1.020862  | 1.229461  |
| S | 0.560093  | -0.422982 | 2.506640  |
| O | 1.340796  | -1.370185 | 1.608675  |
| C | -0.200342 | -1.543107 | 3.809700  |
| C | 0.970214  | -1.819508 | 4.751595  |
| H | 0.646661  | -2.504807 | 5.541819  |
| H | 1.804079  | -2.291050 | 4.221849  |
| H | 1.335719  | -0.904588 | 5.229636  |
| C | -0.655840 | -2.852621 | 3.185194  |
| H | 0.187161  | -3.373616 | 2.724282  |
| H | -1.060926 | -3.498228 | 3.972593  |
| H | -1.429220 | -2.738219 | 2.420368  |
| C | -1.298738 | -0.792324 | 4.542750  |
| H | -0.952624 | 0.185231  | 4.893820  |
| H | -2.187112 | -0.629516 | 3.927542  |
| H | -1.601549 | -1.369597 | 5.423731  |
| C | -5.883845 | 4.027287  | 0.620936  |
| C | -6.393259 | 3.982487  | -0.825709 |
| H | -7.125863 | 4.779110  | -0.998237 |
| H | -5.583357 | 4.118354  | -1.549398 |
| H | -6.879555 | 3.025556  | -1.046005 |
| C | -5.190007 | 5.373384  | 0.864602  |
| H | -5.887096 | 6.202308  | 0.697044  |
| H | -4.817223 | 5.449157  | 1.891814  |
| H | -4.338639 | 5.515141  | 0.190489  |

|    |           |           |           |
|----|-----------|-----------|-----------|
| C  | -7.086493 | 3.916070  | 1.555591  |
| H  | -7.629978 | 2.975741  | 1.406778  |
| H  | -6.797172 | 3.975400  | 2.610321  |
| H  | -7.785936 | 4.735605  | 1.359953  |
| Cu | 1.550445  | -0.648061 | -0.694211 |
| C  | 3.087541  | 1.418695  | -2.440941 |
| H  | 4.069679  | 1.804822  | -2.742493 |
| N  | 3.045603  | 0.256797  | -1.812960 |
| C  | 4.201018  | -0.428623 | -1.647336 |
| C  | 4.133081  | -1.644844 | -0.938480 |
| O  | 3.102776  | -2.086156 | -0.386440 |
| O  | 5.303457  | -2.342744 | -0.905971 |
| C  | 5.223789  | -3.609059 | -0.255811 |
| H  | 4.567966  | -4.292580 | -0.804505 |
| H  | 6.240666  | -4.003043 | -0.242874 |
| H  | 4.847826  | -3.515523 | 0.767717  |
| C  | 1.958184  | 2.226246  | -2.816367 |
| C  | 0.616551  | 1.859926  | -2.583846 |
| C  | 2.196903  | 3.466034  | -3.447975 |
| C  | -0.426567 | 2.693520  | -2.960108 |
| H  | 0.438774  | 0.921860  | -2.066629 |
| C  | 1.149931  | 4.300113  | -3.816088 |
| H  | 3.225982  | 3.765857  | -3.640757 |
| C  | -0.172907 | 3.922488  | -3.575987 |
| H  | -1.454005 | 2.383374  | -2.773565 |
| H  | 1.364015  | 5.251105  | -4.298212 |
| H  | -0.993658 | 4.571554  | -3.868968 |
| C  | 3.119261  | 4.274637  | 0.315572  |
| C  | 4.123590  | 3.398658  | 0.790770  |

|   |          |           |           |
|---|----------|-----------|-----------|
| C | 5.379754 | 3.918740  | 1.097329  |
| C | 5.612114 | 5.285364  | 0.926340  |
| C | 4.607944 | 6.126114  | 0.444551  |
| C | 3.340757 | 5.629777  | 0.128413  |
| C | 2.153385 | 2.210891  | 0.347211  |
| C | 3.540325 | 2.063679  | 0.822164  |
| H | 6.176221 | 3.274594  | 1.459762  |
| H | 6.588704 | 5.696419  | 1.164780  |
| H | 4.811541 | 7.184547  | 0.308869  |
| H | 2.556911 | 6.279056  | -0.250996 |
| O | 1.277149 | 1.332466  | 0.232792  |
| N | 1.956047 | 3.543053  | 0.091146  |
| C | 4.006962 | 0.849439  | 1.199737  |
| H | 3.304818 | 0.018209  | 1.084514  |
| C | 5.325674 | 0.557715  | 1.841045  |
| H | 5.547859 | 1.389617  | 2.527409  |
| C | 6.471301 | 0.488876  | 0.824946  |
| H | 7.435842 | 0.449027  | 1.343190  |
| H | 6.382168 | -0.408299 | 0.204566  |
| H | 6.479106 | 1.357830  | 0.159039  |
| C | 5.236349 | -0.732250 | 2.647246  |
| H | 6.182167 | -0.958457 | 3.149582  |
| H | 4.450724 | -0.678083 | 3.408835  |
| H | 4.993846 | -1.574397 | 1.987080  |
| H | 5.132349 | -0.081777 | -2.094234 |
| H | 1.109196 | 3.908363  | -0.321275 |

Vibrational frequencies

|         |         |         |
|---------|---------|---------|
| 16.9967 | 20.0143 | 25.4807 |
| 26.6166 | 28.2238 | 35.2312 |

|          |          |          |
|----------|----------|----------|
| 36.3183  | 39.9172  | 44.6020  |
| 46.4462  | 47.7641  | 55.2420  |
| 59.8606  | 61.0852  | 68.9272  |
| 71.6367  | 74.3392  | 78.5123  |
| 80.1998  | 84.7104  | 87.2583  |
| 93.8057  | 99.5778  | 100.7724 |
| 104.3684 | 106.7925 | 113.5537 |
| 115.7396 | 122.7511 | 128.1959 |
| 133.7862 | 136.2319 | 140.8191 |
| 143.3476 | 148.4610 | 154.4204 |
| 162.4966 | 163.9669 | 165.7735 |
| 171.3536 | 178.1560 | 186.7060 |
| 190.7942 | 205.6682 | 207.0673 |
| 216.7232 | 227.5450 | 229.6853 |
| 231.1243 | 244.3510 | 249.0804 |
| 253.6213 | 257.4585 | 261.1483 |
| 262.0149 | 263.7144 | 270.2030 |
| 279.8102 | 284.5369 | 288.0681 |
| 291.3082 | 292.2355 | 293.7328 |
| 298.1923 | 308.9416 | 317.8085 |
| 322.3666 | 323.7048 | 328.5966 |
| 331.9356 | 333.7830 | 338.4267 |
| 340.9705 | 341.8336 | 346.0400 |
| 353.2408 | 355.6136 | 365.4488 |
| 366.4147 | 376.9009 | 377.6828 |
| 389.5083 | 393.5254 | 396.8207 |
| 414.9485 | 415.3508 | 418.3621 |
| 424.9347 | 425.9689 | 427.0315 |
| 430.5608 | 435.6375 | 442.3128 |

|          |          |          |
|----------|----------|----------|
| 452.6246 | 457.0798 | 467.7617 |
| 471.7712 | 473.1450 | 485.1354 |
| 501.3021 | 503.7238 | 512.8427 |
| 520.3772 | 521.8983 | 529.7167 |
| 538.1815 | 543.0848 | 558.4706 |
| 568.8104 | 577.1184 | 579.9232 |
| 581.3977 | 594.1199 | 600.3816 |
| 613.3404 | 621.2009 | 628.3784 |
| 630.1460 | 636.1008 | 638.0230 |
| 647.7696 | 651.5760 | 665.4128 |
| 668.2288 | 680.2827 | 690.8181 |
| 708.0591 | 711.1272 | 715.7592 |
| 721.2734 | 721.6744 | 726.7396 |
| 731.8881 | 737.6041 | 755.0664 |
| 758.4695 | 762.0697 | 764.7149 |
| 765.4667 | 767.4267 | 773.8799 |
| 779.1778 | 786.1538 | 800.1815 |
| 809.3739 | 813.8239 | 829.1189 |
| 843.4788 | 854.0388 | 859.3976 |
| 859.6123 | 861.7783 | 864.1274 |
| 865.4741 | 870.7838 | 870.8450 |
| 872.3525 | 895.5591 | 898.1097 |
| 900.0544 | 908.2060 | 911.5901 |
| 912.3730 | 924.0531 | 925.0676 |
| 930.8899 | 932.9024 | 936.0968 |
| 938.7259 | 952.2044 | 952.9789 |
| 953.9382 | 956.6148 | 962.0753 |
| 964.3463 | 967.9857 | 972.0240 |
| 973.4459 | 975.3856 | 976.8969 |

|           |           |           |
|-----------|-----------|-----------|
| 979.7368  | 982.1819  | 987.8304  |
| 990.5388  | 997.3747  | 1002.5754 |
| 1003.3523 | 1003.4378 | 1010.4585 |
| 1012.9038 | 1016.0796 | 1017.9381 |
| 1020.0702 | 1030.6672 | 1035.5739 |
| 1037.3681 | 1039.2462 | 1044.4103 |
| 1045.4505 | 1051.3730 | 1051.7556 |
| 1054.0153 | 1058.6681 | 1061.0167 |
| 1064.6605 | 1083.7689 | 1104.8575 |
| 1111.5296 | 1112.0067 | 1114.2700 |
| 1119.7527 | 1125.3621 | 1127.6489 |
| 1134.5800 | 1151.2075 | 1155.4649 |
| 1159.9140 | 1165.3748 | 1166.3758 |
| 1166.8965 | 1171.9651 | 1175.2221 |
| 1189.9022 | 1191.8228 | 1194.9713 |
| 1195.1301 | 1198.0364 | 1202.9883 |
| 1204.4176 | 1205.6236 | 1209.1304 |
| 1211.3555 | 1221.8836 | 1222.4948 |
| 1228.5339 | 1234.4123 | 1240.0163 |
| 1240.0767 | 1258.6373 | 1270.4718 |
| 1271.4383 | 1271.9767 | 1274.9204 |
| 1294.7775 | 1299.5946 | 1300.4347 |
| 1306.1318 | 1312.6529 | 1318.5831 |
| 1320.6281 | 1328.4397 | 1338.7698 |
| 1342.0359 | 1344.0379 | 1347.8729 |
| 1366.5619 | 1371.1952 | 1381.1303 |
| 1382.1153 | 1382.4993 | 1383.3348 |
| 1386.6857 | 1387.5233 | 1388.5743 |
| 1390.5576 | 1390.9478 | 1397.9160 |



|           |           |           |
|-----------|-----------|-----------|
| 1399.4913 | 1404.9069 | 1408.2150 |
| 1409.2530 | 1410.7245 | 1438.9213 |
| 1439.2785 | 1445.3348 | 1445.8251 |
| 1448.0924 | 1451.9604 | 1452.2760 |
| 1457.8763 | 1463.5470 | 1464.3661 |
| 1464.6374 | 1466.7316 | 1468.2055 |
| 1470.1846 | 1472.4642 | 1472.6343 |
| 1476.0416 | 1476.0864 | 1478.8295 |
| 1480.1243 | 1483.2035 | 1483.2520 |
| 1484.2873 | 1484.6171 | 1486.0513 |
| 1493.3554 | 1493.6418 | 1495.8893 |
| 1497.3956 | 1497.9676 | 1504.8333 |
| 1510.8181 | 1521.5251 | 1526.3764 |
| 1529.4317 | 1531.6220 | 1554.3322 |
| 1560.3509 | 1616.2595 | 1624.3523 |
| 1624.8985 | 1631.0305 | 1642.3038 |
| 1642.7963 | 1648.5481 | 1657.6293 |
| 1661.2161 | 1663.9061 | 1673.3949 |
| 1674.2796 | 1678.9961 | 1714.9471 |
| 1805.9734 | 3016.4054 | 3039.5977 |
| 3042.0329 | 3042.6085 | 3047.6850 |
| 3047.9611 | 3052.3444 | 3052.5749 |
| 3053.1241 | 3056.3423 | 3057.1051 |
| 3058.5785 | 3062.9345 | 3086.9595 |
| 3091.0519 | 3124.7831 | 3130.6096 |
| 3135.3238 | 3139.5571 | 3143.9348 |
| 3144.4690 | 3145.9089 | 3147.0655 |
| 3147.2741 | 3148.1086 | 3148.9256 |
| 3152.7540 | 3154.2507 | 3155.4448 |

|           |           |           |
|-----------|-----------|-----------|
| 3158.5651 | 3160.7307 | 3161.0609 |
| 3162.4659 | 3163.1719 | 3169.2159 |
| 3171.8386 | 3173.3781 | 3173.8434 |
| 3174.4257 | 3175.5028 | 3177.1707 |
| 3181.6891 | 3182.7472 | 3184.6114 |
| 3186.9135 | 3192.7964 | 3193.6964 |
| 3194.7910 | 3195.4943 | 3197.3483 |
| 3198.0317 | 3199.0313 | 3200.1634 |
| 3201.1638 | 3205.3447 | 3205.3570 |
| 3213.1570 | 3214.1705 | 3215.9379 |
| 3217.5383 | 3219.6974 | 3222.1788 |
| 3229.2935 | 3447.0828 | 3661.8032 |

## TS1R

Zero-point correction= 1.097161

Thermal correction to Energy= 1.163377

Thermal correction to Enthalpy= 1.164321

Thermal correction to Gibbs Free Energy= 0.995675

Sum of electronic and zero-point Energies= -5054.848871

Sum of electronic and thermal Energies= -5054.782655

Sum of electronic and thermal Enthalpies= -5054.781711

Sum of electronic and thermal Free Energies= -5054.950357

Cartesian coordinates

|   |           |           |           |
|---|-----------|-----------|-----------|
| C | 1.793500  | -0.224014 | -0.674746 |
| C | 1.230015  | 0.452763  | -2.906483 |
| C | 2.281863  | -0.141682 | -1.925723 |
| C | -0.074632 | -0.212976 | -2.423089 |
| H | -0.972078 | 0.158077  | -2.922240 |
| H | -0.041673 | -1.306053 | -2.494549 |

|   |           |           |           |
|---|-----------|-----------|-----------|
| C | 0.378881  | 2.070488  | -1.341278 |
| C | 1.025964  | 1.931965  | -2.520226 |
| C | 1.532163  | 0.213609  | -4.373467 |
| H | 2.466081  | 0.688765  | -4.690952 |
| H | 1.625436  | -0.858043 | -4.577330 |
| H | 0.725301  | 0.604431  | -5.001113 |
| C | 1.617217  | 3.003728  | -3.364423 |
| H | 1.055025  | 3.141423  | -4.297004 |
| H | 1.645359  | 3.966206  | -2.847581 |
| H | 2.639777  | 2.743370  | -3.665067 |
| C | 0.051269  | 3.276348  | -0.585861 |
| C | 0.139088  | 3.262184  | 0.817166  |
| C | -0.381055 | 4.461600  | -1.207050 |
| C | -0.164305 | 4.391449  | 1.568381  |
| H | 0.440417  | 2.344353  | 1.319302  |
| C | -0.687321 | 5.590503  | -0.453269 |
| H | -0.508694 | 4.481746  | -2.286244 |
| C | -0.577520 | 5.563627  | 0.936385  |
| H | -0.083342 | 4.351591  | 2.651924  |
| H | -1.027963 | 6.493009  | -0.954509 |
| H | -0.823268 | 6.445251  | 1.522040  |
| P | 0.039646  | 0.369039  | -0.685553 |
| C | 3.624291  | -0.526580 | -2.400303 |
| C | 3.957323  | -1.877621 | -2.559502 |
| C | 4.580612  | 0.445396  | -2.723031 |
| C | 5.221231  | -2.249635 | -3.009893 |
| H | 3.213773  | -2.637884 | -2.324373 |
| C | 5.845269  | 0.072165  | -3.166195 |
| H | 4.335819  | 1.498266  | -2.595072 |

|   |          |           |           |
|---|----------|-----------|-----------|
| C | 6.171895 | -1.275843 | -3.307603 |
| H | 5.464935 | -3.302859 | -3.122478 |
| H | 6.579193 | 0.838947  | -3.400177 |
| H | 7.161573 | -1.564630 | -3.651836 |
| C | 2.445574 | -0.634427 | 0.616843  |
| H | 1.969103 | -0.026536 | 1.402136  |
| C | 3.930762 | -0.354263 | 0.661659  |
| C | 4.346142 | 0.980560  | 0.714704  |
| C | 4.903742 | -1.346038 | 0.600365  |
| C | 5.693789 | 1.306907  | 0.682417  |
| H | 3.596903 | 1.771142  | 0.764801  |
| C | 6.258309 | -1.013367 | 0.556530  |
| H | 4.600764 | -2.389827 | 0.559301  |
| C | 6.683882 | 0.316295  | 0.587529  |
| H | 5.984834 | 2.354840  | 0.723461  |
| H | 6.985651 | -1.816885 | 0.483444  |
| N | 2.102583 | -2.046021 | 0.928004  |
| H | 1.826590 | -2.555092 | 0.092991  |
| S | 0.970062 | -2.394770 | 2.148675  |
| O | 0.026609 | -1.206809 | 2.360565  |
| C | 2.051100 | -2.342711 | 3.679260  |
| C | 1.096425 | -2.706484 | 4.810405  |
| H | 1.656026 | -2.748973 | 5.750247  |
| H | 0.304753 | -1.960920 | 4.922333  |
| H | 0.631063 | -3.686246 | 4.658393  |
| C | 2.623985 | -0.952900 | 3.877195  |
| H | 1.843068 | -0.187547 | 3.822232  |
| H | 3.077644 | -0.893368 | 4.872326  |
| H | 3.406066 | -0.723963 | 3.147435  |

|    |           |           |           |
|----|-----------|-----------|-----------|
| C  | 3.128787  | -3.395192 | 3.496040  |
| H  | 3.712372  | -3.475725 | 4.419009  |
| H  | 2.705196  | -4.383876 | 3.287503  |
| H  | 3.811415  | -3.130694 | 2.683714  |
| C  | 8.155509  | 0.721762  | 0.525099  |
| C  | 8.376994  | 1.649773  | -0.675536 |
| H  | 9.420162  | 1.983717  | -0.713653 |
| H  | 8.153945  | 1.134424  | -1.616037 |
| H  | 7.745177  | 2.542798  | -0.626345 |
| C  | 9.078224  | -0.485160 | 0.369305  |
| H  | 10.119624 | -0.152145 | 0.307891  |
| H  | 9.004954  | -1.175407 | 1.216849  |
| H  | 8.856939  | -1.048249 | -0.544945 |
| C  | 8.530199  | 1.470504  | 1.810242  |
| H  | 7.917802  | 2.368229  | 1.946128  |
| H  | 8.395560  | 0.838291  | 2.694648  |
| H  | 9.579376  | 1.786010  | 1.779460  |
| Cu | -1.137525 | -0.153996 | 0.974351  |
| C  | -3.701265 | -1.776557 | 0.603161  |
| H  | -4.792976 | -1.806563 | 0.689612  |
| N  | -3.050244 | -0.751809 | 1.087634  |
| C  | -3.788393 | 0.320228  | 1.558744  |
| C  | -3.027306 | 1.198353  | 2.408985  |
| O  | -1.781816 | 1.238547  | 2.427852  |
| O  | -3.776872 | 2.010963  | 3.174708  |
| C  | -3.047841 | 2.993357  | 3.917630  |
| H  | -2.457464 | 3.629842  | 3.250632  |
| H  | -3.797937 | 3.589486  | 4.436407  |
| H  | -2.378764 | 2.520799  | 4.641273  |

|   |           |           |           |
|---|-----------|-----------|-----------|
| C | -3.071353 | -2.908460 | -0.041119 |
| C | -3.884833 | -3.920189 | -0.582559 |
| C | -1.677514 | -3.028673 | -0.184463 |
| C | -3.326300 | -5.005803 | -1.245564 |
| H | -4.965548 | -3.835371 | -0.480431 |
| C | -1.123142 | -4.114461 | -0.845886 |
| H | -1.046822 | -2.251866 | 0.244910  |
| C | -1.941965 | -5.108683 | -1.384011 |
| H | -3.972656 | -5.775926 | -1.658523 |
| H | -0.041865 | -4.190994 | -0.946495 |
| H | -1.504130 | -5.957107 | -1.902597 |
| C | -6.510529 | -1.199680 | -1.660284 |
| C | -6.328044 | -0.110356 | -0.761740 |
| C | -7.365010 | 0.205592  | 0.121601  |
| C | -8.553984 | -0.529519 | 0.083350  |
| C | -8.715580 | -1.580983 | -0.820605 |
| C | -7.686431 | -1.934731 | -1.701153 |
| C | -4.356145 | -0.445889 | -1.975017 |
| C | -4.988250 | 0.385375  | -0.952927 |
| H | -7.249204 | 1.019462  | 0.835381  |
| H | -9.361809 | -0.278306 | 0.765994  |
| H | -9.647493 | -2.140096 | -0.838956 |
| H | -7.801546 | -2.763924 | -2.395225 |
| H | -5.180137 | -2.075409 | -3.072331 |
| O | -3.229516 | -0.390928 | -2.478018 |
| N | -5.342069 | -1.363606 | -2.377108 |
| C | -4.270099 | 1.353581  | -0.241356 |
| H | -3.238233 | 1.449926  | -0.602067 |
| C | -4.857944 | 2.653288  | 0.284470  |

|   |           |          |           |
|---|-----------|----------|-----------|
| H | -5.377770 | 2.460536 | 1.234662  |
| C | -5.872145 | 3.249980 | -0.691746 |
| H | -6.259695 | 4.201215 | -0.309579 |
| H | -5.404323 | 3.450056 | -1.662537 |
| H | -6.722706 | 2.585858 | -0.866234 |
| C | -3.744893 | 3.669275 | 0.530716  |
| H | -4.104519 | 4.537316 | 1.094505  |
| H | -2.892110 | 3.245496 | 1.069917  |
| H | -3.355987 | 4.035345 | -0.427359 |
| H | -4.834772 | 0.156082 | 1.828268  |

Vibrational frequencies

|           |          |          |
|-----------|----------|----------|
| -374.0912 | 15.0411  | 17.3105  |
| 19.7132   | 23.5366  | 28.3978  |
| 32.3494   | 34.3887  | 36.7743  |
| 39.6849   | 44.5846  | 47.8592  |
| 54.4813   | 56.4917  | 58.8901  |
| 61.8898   | 63.2577  | 70.1273  |
| 71.1341   | 78.0443  | 79.7078  |
| 85.1604   | 91.2930  | 92.3069  |
| 99.3073   | 103.2881 | 105.6335 |
| 113.5825  | 119.8231 | 124.3717 |
| 127.9191  | 129.8316 | 140.2513 |
| 144.0665  | 148.6096 | 151.2277 |
| 154.2629  | 160.8107 | 168.9023 |
| 169.6290  | 180.8833 | 187.3901 |
| 191.5203  | 191.8365 | 208.2367 |
| 210.6055  | 212.3046 | 222.6334 |
| 226.2686  | 229.2766 | 238.5712 |
| 245.3856  | 247.7518 | 249.9949 |

|          |          |          |
|----------|----------|----------|
| 256.3304 | 262.1116 | 270.0400 |
| 272.7588 | 275.6377 | 276.9126 |
| 278.8236 | 280.7396 | 289.4635 |
| 293.6892 | 298.7092 | 300.4455 |
| 308.7488 | 313.4507 | 318.7599 |
| 326.7158 | 328.8193 | 335.5181 |
| 342.7322 | 345.3830 | 351.1513 |
| 356.2428 | 359.4074 | 362.0158 |
| 364.0093 | 372.3852 | 375.9892 |
| 383.4524 | 400.7116 | 408.4156 |
| 414.1861 | 415.2892 | 421.5245 |
| 421.7838 | 424.5964 | 424.8093 |
| 427.3350 | 429.7072 | 431.4459 |
| 445.5905 | 458.8607 | 472.9047 |
| 473.8353 | 487.4231 | 488.6124 |
| 496.4991 | 506.1627 | 508.3383 |
| 512.1828 | 520.8401 | 527.0651 |
| 533.6561 | 549.5658 | 555.7537 |
| 558.0755 | 565.4675 | 575.9351 |
| 582.4103 | 593.2086 | 596.2171 |
| 611.6453 | 616.2528 | 627.2741 |
| 628.9026 | 630.3463 | 631.6939 |
| 638.3101 | 653.6943 | 661.3683 |
| 668.1966 | 681.5475 | 702.3607 |
| 707.0019 | 714.8836 | 715.3651 |
| 716.8487 | 723.8999 | 725.0418 |
| 734.1517 | 741.6605 | 745.8611 |
| 749.0654 | 763.4992 | 765.8704 |
| 768.3524 | 770.6587 | 773.0577 |



|           |           |           |
|-----------|-----------|-----------|
| 774.8186  | 809.1974  | 817.9593  |
| 819.8196  | 834.8613  | 840.3503  |
| 849.9316  | 853.1754  | 853.3507  |
| 856.1766  | 863.4459  | 866.8484  |
| 873.3732  | 873.7644  | 889.4734  |
| 895.7030  | 902.3562  | 905.1814  |
| 909.9421  | 912.5330  | 918.5393  |
| 919.1897  | 927.3027  | 932.4617  |
| 933.6888  | 939.1475  | 940.3090  |
| 942.8802  | 950.0244  | 951.7303  |
| 954.1040  | 954.4823  | 962.7500  |
| 964.2285  | 964.9117  | 967.4398  |
| 970.7750  | 971.4587  | 977.9995  |
| 981.8400  | 984.1851  | 988.5432  |
| 989.3940  | 991.6358  | 992.9905  |
| 1008.8654 | 1014.4570 | 1014.8631 |
| 1015.8328 | 1016.4825 | 1017.2915 |
| 1026.1907 | 1033.7121 | 1037.5302 |
| 1037.6553 | 1038.2131 | 1041.9661 |
| 1046.5756 | 1047.0794 | 1047.9973 |
| 1051.6429 | 1054.1483 | 1057.1906 |
| 1060.5973 | 1065.4897 | 1095.7883 |
| 1102.6181 | 1110.3105 | 1111.8022 |
| 1113.5976 | 1122.0148 | 1124.1838 |
| 1134.4470 | 1139.1889 | 1148.7313 |
| 1158.2654 | 1160.7241 | 1161.7550 |
| 1167.5234 | 1167.8539 | 1169.2992 |
| 1183.8319 | 1186.1835 | 1189.1945 |
| 1192.0979 | 1194.4523 | 1198.0141 |

|           |           |           |
|-----------|-----------|-----------|
| 1198.8573 | 1206.0136 | 1206.7817 |
| 1210.5252 | 1211.1772 | 1212.4367 |
| 1231.9229 | 1234.8050 | 1240.5466 |
| 1241.9395 | 1253.8969 | 1262.4925 |
| 1269.5379 | 1274.5181 | 1279.2244 |
| 1294.2010 | 1297.0541 | 1299.0052 |
| 1309.3291 | 1319.3296 | 1320.9916 |
| 1324.0120 | 1333.9790 | 1335.2427 |
| 1343.4685 | 1347.0389 | 1351.5249 |
| 1364.7628 | 1374.2226 | 1376.4074 |
| 1381.7941 | 1383.0263 | 1384.1270 |
| 1386.7136 | 1390.0053 | 1391.7873 |
| 1391.9265 | 1392.6398 | 1394.8941 |
| 1401.4072 | 1404.4357 | 1409.4266 |
| 1409.5968 | 1409.8450 | 1435.1951 |
| 1440.7597 | 1446.9123 | 1448.6940 |
| 1449.5783 | 1451.6427 | 1452.0880 |
| 1455.9702 | 1457.0308 | 1460.1905 |
| 1464.3191 | 1464.9640 | 1465.0638 |
| 1467.6900 | 1470.2427 | 1470.4104 |
| 1470.9677 | 1472.5418 | 1476.2741 |
| 1476.8309 | 1477.4842 | 1479.4262 |
| 1481.1426 | 1481.3994 | 1483.9518 |
| 1484.6046 | 1484.8928 | 1485.7612 |
| 1493.1616 | 1494.0068 | 1495.6033 |
| 1502.8644 | 1513.8260 | 1522.8024 |
| 1523.8928 | 1533.9327 | 1548.7614 |
| 1550.2918 | 1596.3402 | 1623.0153 |
| 1624.6859 | 1627.5681 | 1627.8969 |

|           |           |           |
|-----------|-----------|-----------|
| 1630.8345 | 1653.5198 | 1657.3732 |
| 1659.6106 | 1664.4667 | 1673.6293 |
| 1675.0569 | 1678.5754 | 1698.4237 |
| 1761.4374 | 3033.2538 | 3043.2808 |
| 3043.6455 | 3045.5208 | 3046.3440 |
| 3047.0124 | 3048.6207 | 3053.4209 |
| 3054.8199 | 3057.7705 | 3058.9540 |
| 3061.2844 | 3063.2482 | 3088.9034 |
| 3101.7472 | 3103.2025 | 3118.7077 |
| 3128.9565 | 3131.4135 | 3131.9223 |
| 3136.5541 | 3138.2010 | 3145.2191 |
| 3145.5257 | 3146.7289 | 3146.9125 |
| 3151.0357 | 3152.0411 | 3156.0424 |
| 3156.7060 | 3160.6410 | 3162.6034 |
| 3163.4122 | 3163.4469 | 3163.8583 |
| 3165.3855 | 3167.1699 | 3169.7258 |
| 3171.7422 | 3174.3196 | 3176.1982 |
| 3182.4431 | 3182.9298 | 3183.6055 |
| 3184.5666 | 3187.1082 | 3189.8584 |
| 3191.4322 | 3195.0021 | 3195.3478 |
| 3196.2717 | 3197.8428 | 3198.7461 |
| 3199.3520 | 3202.4716 | 3206.7321 |
| 3207.7482 | 3208.7599 | 3210.8284 |
| 3217.4828 | 3217.6941 | 3218.7793 |
| 3221.0653 | 3563.1464 | 3676.6358 |

## TS1S

Zero-point correction= 1.098635

Thermal correction to Energy= 1.164219

Thermal correction to Enthalpy= 1.165163  
 Thermal correction to Gibbs Free Energy= 0.999388  
 Sum of electronic and zero-point Energies= -5054.841589  
 Sum of electronic and thermal Energies= -5054.776005  
 Sum of electronic and thermal Enthalpies= -5054.775061  
 Sum of electronic and thermal Free Energies= -5054.940836

Cartesian coordinates

|   |           |          |           |
|---|-----------|----------|-----------|
| C | 1.937159  | 1.033176 | -0.151280 |
| C | 2.596968  | 1.970872 | -2.274970 |
| C | 3.000702  | 1.388529 | -0.903120 |
| C | 1.361244  | 1.128491 | -2.635821 |
| H | 0.853003  | 1.479419 | -3.539991 |
| H | 1.599555  | 0.063148 | -2.735262 |
| C | 0.785883  | 3.289567 | -1.400902 |
| C | 1.999854  | 3.358839 | -1.993788 |
| C | 3.681030  | 1.956966 | -3.336991 |
| H | 4.580982  | 2.498059 | -3.027839 |
| H | 3.979587  | 0.931895 | -3.576318 |
| H | 3.313242  | 2.415616 | -4.260501 |
| C | 2.828973  | 4.566988 | -2.252492 |
| H | 2.897266  | 4.804060 | -3.321744 |
| H | 2.443359  | 5.451888 | -1.740976 |
| H | 3.859157  | 4.396987 | -1.914387 |
| C | -0.067270 | 4.402292 | -0.989931 |
| C | -0.138658 | 5.586772 | -1.747656 |
| C | -0.844275 | 4.316591 | 0.175815  |
| C | -0.917828 | 6.658964 | -1.326812 |
| H | 0.402380  | 5.653403 | -2.687923 |
| C | -1.613269 | 5.394846 | 0.599734  |

|   |           |           |           |
|---|-----------|-----------|-----------|
| H | -0.853189 | 3.384827  | 0.737712  |
| C | -1.649611 | 6.574199  | -0.143247 |
| H | -0.959535 | 7.561995  | -1.930423 |
| H | -2.194519 | 5.308803  | 1.515590  |
| H | -2.255743 | 7.413811  | 0.186770  |
| P | 0.396512  | 1.481674  | -1.103967 |
| C | 4.409716  | 1.353144  | -0.463311 |
| C | 5.344898  | 0.475827  | -1.030118 |
| C | 4.826670  | 2.202422  | 0.571661  |
| C | 6.653665  | 0.436517  | -0.559624 |
| H | 5.030037  | -0.205332 | -1.818165 |
| C | 6.140136  | 2.171807  | 1.032214  |
| H | 4.106874  | 2.891839  | 1.010453  |
| C | 7.055448  | 1.282941  | 0.472841  |
| H | 7.362629  | -0.261873 | -0.996730 |
| H | 6.446610  | 2.838523  | 1.834051  |
| H | 8.078561  | 1.250744  | 0.837270  |
| C | 2.054309  | 0.347719  | 1.201207  |
| H | 2.460258  | 1.055014  | 1.933230  |
| C | 3.021015  | -0.819577 | 1.110783  |
| C | 4.118102  | -0.924958 | 1.958539  |
| C | 2.823899  | -1.816324 | 0.148738  |
| C | 5.024989  | -1.976022 | 1.825264  |
| H | 4.292600  | -0.152097 | 2.705809  |
| C | 3.720305  | -2.867820 | 0.026631  |
| H | 1.966912  | -1.749604 | -0.522947 |
| C | 4.854122  | -2.961861 | 0.849736  |
| H | 5.887422  | -2.004891 | 2.485317  |
| H | 3.546311  | -3.623578 | -0.737794 |

|   |           |           |           |
|---|-----------|-----------|-----------|
| N | 0.829446  | -0.232945 | 1.790791  |
| H | 0.451499  | -0.985728 | 1.212738  |
| S | -0.522760 | 0.486352  | 2.507897  |
| O | -1.260012 | 1.486795  | 1.629584  |
| C | 0.278106  | 1.542563  | 3.840953  |
| C | -0.886419 | 1.831270  | 4.787487  |
| H | -0.543136 | 2.478606  | 5.601083  |
| H | -1.702113 | 2.347154  | 4.270900  |
| H | -1.285813 | 0.914422  | 5.233655  |
| C | 0.785214  | 2.852063  | 3.259328  |
| H | -0.029032 | 3.402499  | 2.781239  |
| H | 1.178840  | 3.472452  | 4.072300  |
| H | 1.583344  | 2.730347  | 2.521333  |
| C | 1.347827  | 0.735141  | 4.556215  |
| H | 0.968419  | -0.240070 | 4.878858  |
| H | 2.232898  | 0.560656  | 3.938843  |
| H | 1.665748  | 1.277600  | 5.453912  |
| C | 5.843945  | -4.104905 | 0.636739  |
| C | 6.348689  | -4.073613 | -0.811954 |
| H | 7.072700  | -4.878508 | -0.982573 |
| H | 5.534866  | -4.205543 | -1.532015 |
| H | 6.843621  | -3.122798 | -1.039604 |
| C | 5.136694  | -5.442239 | 0.890080  |
| H | 5.824694  | -6.279402 | 0.724971  |
| H | 4.766414  | -5.508154 | 1.918849  |
| H | 4.281667  | -5.578754 | 0.219549  |
| C | 7.051152  | -4.001562 | 1.566318  |
| H | 7.604141  | -3.067888 | 1.410636  |
| H | 6.765230  | -4.052316 | 2.622379  |

|    |           |           |           |
|----|-----------|-----------|-----------|
| H  | 7.741025  | -4.829541 | 1.372215  |
| Cu | -1.496171 | 0.612572  | -0.685852 |
| C  | -3.216256 | -1.463211 | -2.172007 |
| H  | -4.212619 | -1.919306 | -2.227753 |
| N  | -3.095300 | -0.266997 | -1.643964 |
| C  | -4.233576 | 0.268829  | -1.080960 |
| C  | -4.097615 | 1.661180  | -0.727127 |
| O  | -3.006251 | 2.175273  | -0.461731 |
| O  | -5.255551 | 2.347066  | -0.666863 |
| C  | -5.127358 | 3.702261  | -0.218432 |
| H  | -4.518652 | 4.286818  | -0.913098 |
| H  | -6.141526 | 4.098517  | -0.180520 |
| H  | -4.669311 | 3.745290  | 0.773792  |
| C  | -2.133712 | -2.246701 | -2.719868 |
| C  | -0.786497 | -1.846601 | -2.649671 |
| C  | -2.428484 | -3.497752 | -3.293745 |
| C  | 0.220279  | -2.662614 | -3.143821 |
| H  | -0.565275 | -0.905564 | -2.153055 |
| C  | -1.416796 | -4.315691 | -3.779699 |
| H  | -3.466218 | -3.824566 | -3.336514 |
| C  | -0.085776 | -3.902164 | -3.711087 |
| H  | 1.257537  | -2.338096 | -3.079976 |
| H  | -1.664739 | -5.280826 | -4.214004 |
| H  | 0.706431  | -4.541560 | -4.091150 |
| C  | -3.184212 | -4.180600 | 0.396400  |
| C  | -4.211820 | -3.235940 | 0.673544  |
| C  | -5.506823 | -3.717625 | 0.894081  |
| C  | -5.754063 | -5.089069 | 0.816145  |
| C  | -4.729249 | -5.991835 | 0.521173  |

|   |           |           |           |
|---|-----------|-----------|-----------|
| C | -3.423585 | -5.544230 | 0.308033  |
| C | -2.199089 | -2.132305 | 0.379098  |
| C | -3.593130 | -1.928299 | 0.676154  |
| H | -6.322112 | -3.036779 | 1.122504  |
| H | -6.762056 | -5.459110 | 0.984443  |
| H | -4.946431 | -7.054685 | 0.458126  |
| H | -2.617721 | -6.237834 | 0.082088  |
| O | -1.271726 | -1.280473 | 0.271071  |
| N | -1.993282 | -3.490301 | 0.246093  |
| C | -4.082340 | -0.634984 | 0.911266  |
| H | -3.286100 | 0.085499  | 1.118764  |
| C | -5.380158 | -0.386509 | 1.658055  |
| H | -5.494144 | -1.239412 | 2.346149  |
| C | -6.639292 | -0.350967 | 0.793022  |
| H | -7.535221 | -0.417717 | 1.419684  |
| H | -6.702202 | 0.581512  | 0.224102  |
| H | -6.671198 | -1.178323 | 0.076756  |
| C | -5.268135 | 0.875253  | 2.506153  |
| H | -6.177171 | 1.043279  | 3.093347  |
| H | -4.423009 | 0.818749  | 3.201505  |
| H | -5.115555 | 1.759351  | 1.875966  |
| H | -5.205153 | -0.096095 | -1.414754 |
| H | -1.112777 | -3.896073 | -0.034749 |

Vibrational frequencies

|           |         |         |
|-----------|---------|---------|
| -370.7526 | 14.3770 | 18.2954 |
| 24.5044   | 27.4577 | 29.1152 |
| 35.7514   | 40.4015 | 47.7429 |
| 49.6806   | 53.8305 | 54.3227 |
| 60.3837   | 62.9941 | 64.6255 |



|          |          |          |
|----------|----------|----------|
| 70.4976  | 73.2420  | 77.8666  |
| 78.6952  | 87.1429  | 88.1797  |
| 95.2757  | 99.4862  | 102.7409 |
| 106.3376 | 107.8999 | 117.6985 |
| 122.1339 | 125.0979 | 130.3687 |
| 133.6605 | 135.6914 | 148.3518 |
| 150.6462 | 155.6001 | 158.1501 |
| 162.1978 | 170.2000 | 172.0052 |
| 180.2267 | 182.2965 | 193.7860 |
| 202.7251 | 208.3625 | 213.1037 |
| 218.2446 | 224.4286 | 228.0813 |
| 235.8251 | 240.9018 | 242.7358 |
| 249.0207 | 256.4182 | 260.3008 |
| 264.4946 | 268.7290 | 269.5629 |
| 277.1773 | 281.7716 | 284.3357 |
| 288.0660 | 292.3598 | 296.9520 |
| 303.5605 | 308.5791 | 312.1154 |
| 315.6820 | 319.0444 | 325.0140 |
| 330.2435 | 330.7691 | 340.1460 |
| 345.1930 | 345.7397 | 348.9823 |
| 354.1267 | 357.4784 | 360.3424 |
| 367.0122 | 368.8324 | 370.6590 |
| 379.9361 | 402.4959 | 407.0822 |
| 413.6360 | 415.4118 | 420.3779 |
| 424.3209 | 429.9244 | 430.7634 |
| 433.4394 | 434.9502 | 452.1824 |
| 453.6837 | 469.4139 | 471.9386 |
| 475.0595 | 475.4512 | 489.2395 |
| 500.1644 | 506.6244 | 518.5968 |

|           |           |           |
|-----------|-----------|-----------|
| 522.0287  | 524.3131  | 529.5706  |
| 534.5044  | 540.9115  | 544.6736  |
| 550.5802  | 562.9167  | 570.5556  |
| 581.8958  | 592.7500  | 604.2409  |
| 610.2806  | 620.2666  | 628.3853  |
| 631.0048  | 637.1898  | 639.0184  |
| 647.7644  | 649.9980  | 666.5634  |
| 667.8340  | 689.6031  | 689.9630  |
| 714.6023  | 714.7327  | 717.0755  |
| 719.9786  | 727.1550  | 728.5361  |
| 746.3869  | 750.7917  | 751.9042  |
| 755.5917  | 762.5418  | 764.1587  |
| 768.9292  | 772.5064  | 773.9275  |
| 776.4308  | 806.9590  | 811.5649  |
| 817.9491  | 832.4582  | 842.1156  |
| 848.9735  | 851.3673  | 856.7398  |
| 858.0075  | 861.5545  | 863.6558  |
| 864.3072  | 877.6543  | 891.9056  |
| 900.2926  | 901.7404  | 905.9369  |
| 906.9792  | 914.2214  | 921.2881  |
| 922.7226  | 924.0354  | 931.3668  |
| 937.4780  | 939.7600  | 940.5396  |
| 947.7008  | 948.2398  | 954.8226  |
| 955.9848  | 957.5542  | 960.2040  |
| 963.1101  | 968.7619  | 968.8964  |
| 969.1739  | 969.8086  | 974.1072  |
| 982.1527  | 982.9363  | 988.3059  |
| 992.7493  | 995.4669  | 1016.1985 |
| 1016.8904 | 1017.6505 | 1018.2032 |

|           |           |           |
|-----------|-----------|-----------|
| 1020.5422 | 1027.3843 | 1034.3400 |
| 1036.0897 | 1038.3313 | 1040.7106 |
| 1042.0245 | 1045.1638 | 1046.7601 |
| 1050.4294 | 1054.8363 | 1055.5768 |
| 1056.7186 | 1057.2827 | 1062.3633 |
| 1064.9133 | 1072.7596 | 1102.5061 |
| 1107.8787 | 1108.7496 | 1115.7539 |
| 1117.0198 | 1119.6699 | 1122.9886 |
| 1137.5633 | 1140.3617 | 1152.3439 |
| 1163.1063 | 1166.4541 | 1166.8593 |
| 1171.3499 | 1175.7900 | 1177.7663 |
| 1184.4573 | 1189.7582 | 1191.5344 |
| 1191.9335 | 1196.9229 | 1201.7486 |
| 1206.5640 | 1209.6764 | 1213.8708 |
| 1215.0310 | 1217.4796 | 1227.7896 |
| 1236.0566 | 1240.1358 | 1241.3545 |
| 1248.1341 | 1256.4139 | 1265.8950 |
| 1268.6823 | 1269.5004 | 1273.0013 |
| 1285.0661 | 1295.7458 | 1300.8155 |
| 1307.7388 | 1314.7461 | 1321.2294 |
| 1324.9300 | 1334.9695 | 1337.1462 |
| 1337.7512 | 1340.0428 | 1362.4517 |
| 1370.2270 | 1375.1927 | 1378.3133 |
| 1381.4281 | 1383.0403 | 1383.8601 |
| 1387.4651 | 1389.4821 | 1390.1469 |
| 1390.3045 | 1392.5507 | 1398.5738 |
| 1402.5145 | 1404.0478 | 1406.1488 |
| 1407.5441 | 1412.7199 | 1426.6934 |
| 1437.6957 | 1443.0997 | 1449.8098 |

|           |           |           |
|-----------|-----------|-----------|
| 1450.8519 | 1452.6038 | 1456.8942 |
| 1457.4194 | 1461.6037 | 1463.0285 |
| 1467.8042 | 1469.3953 | 1470.6260 |
| 1470.8159 | 1471.7594 | 1475.0156 |
| 1475.2828 | 1475.5059 | 1476.2247 |
| 1479.8945 | 1480.6811 | 1482.1441 |
| 1483.2207 | 1484.9260 | 1485.5757 |
| 1486.1119 | 1488.9924 | 1492.5469 |
| 1495.5684 | 1499.9020 | 1500.7645 |
| 1503.2436 | 1517.3980 | 1520.5054 |
| 1529.1346 | 1533.1047 | 1543.6159 |
| 1552.2830 | 1587.9229 | 1624.6813 |
| 1625.9000 | 1627.2896 | 1628.6773 |
| 1632.0497 | 1649.6512 | 1659.7244 |
| 1663.0277 | 1664.1915 | 1665.4534 |
| 1670.5119 | 1672.8910 | 1694.1352 |
| 1702.7144 | 3030.1591 | 3035.3220 |
| 3041.5805 | 3045.0838 | 3046.0696 |
| 3047.5443 | 3048.8170 | 3050.8125 |
| 3051.7089 | 3054.7097 | 3057.6286 |
| 3057.8433 | 3064.4140 | 3077.7895 |
| 3088.2184 | 3106.0964 | 3116.9089 |
| 3128.9239 | 3136.7512 | 3138.3421 |
| 3139.2945 | 3139.5499 | 3142.1622 |
| 3144.1266 | 3146.5879 | 3148.0828 |
| 3148.2938 | 3152.8058 | 3153.7055 |
| 3157.2057 | 3157.8742 | 3159.7229 |
| 3160.9621 | 3161.5244 | 3163.7094 |
| 3164.1159 | 3165.4346 | 3166.5208 |

|           |           |           |
|-----------|-----------|-----------|
| 3167.4705 | 3169.3409 | 3170.8098 |
| 3178.0449 | 3182.4473 | 3182.9283 |
| 3183.8064 | 3184.8480 | 3188.6332 |
| 3190.2648 | 3192.7645 | 3194.9391 |
| 3196.0855 | 3198.5430 | 3203.1868 |
| 3204.4970 | 3205.5422 | 3207.0415 |
| 3207.3450 | 3208.0656 | 3209.6435 |
| 3212.7343 | 3215.9473 | 3222.2751 |
| 3224.2083 | 3490.9480 | 3659.9857 |

### **MIR**

Zero-point correction= 1.099509

Thermal correction to Energy= 1.165946

Thermal correction to Enthalpy= 1.166890

Thermal correction to Gibbs Free Energy= 0.997139

Sum of electronic and zero-point Energies= -5054.857775

Sum of electronic and thermal Energies= -5054.791338

Sum of electronic and thermal Enthalpies= -5054.790394

Sum of electronic and thermal Free Energies= -5054.960145

Cartesian coordinates

|   |           |           |           |
|---|-----------|-----------|-----------|
| C | 1.787979  | -0.243885 | -0.703029 |
| C | 1.208237  | 0.410049  | -2.937948 |
| C | 2.274762  | -0.155108 | -1.954042 |
| C | -0.082546 | -0.280539 | -2.453123 |
| H | -0.991700 | 0.068794  | -2.946574 |
| H | -0.023568 | -1.372702 | -2.517372 |
| C | 0.334095  | 2.015438  | -1.371843 |
| C | 0.979782  | 1.885969  | -2.553058 |
| C | 1.516210  | 0.172092  | -4.403740 |

|   |           |           |           |
|---|-----------|-----------|-----------|
| H | 2.442759  | 0.661703  | -4.720869 |
| H | 1.627686  | -0.898358 | -4.604687 |
| H | 0.703738  | 0.547944  | -5.033135 |
| C | 1.565110  | 2.964087  | -3.392919 |
| H | 0.999991  | 3.103669  | -4.323333 |
| H | 1.590672  | 3.924694  | -2.872491 |
| H | 2.587837  | 2.708119  | -3.696837 |
| C | 0.034148  | 3.215641  | -0.596698 |
| C | 0.155594  | 3.183257  | 0.803997  |
| C | -0.384661 | 4.417131  | -1.194769 |
| C | -0.096438 | 4.312732  | 1.573657  |
| H | 0.454535  | 2.253734  | 1.288268  |
| C | -0.641520 | 5.545604  | -0.421949 |
| H | -0.538615 | 4.451395  | -2.270054 |
| C | -0.494120 | 5.501739  | 0.963570  |
| H | 0.014374  | 4.261680  | 2.654019  |
| H | -0.972032 | 6.461668  | -0.904822 |
| H | -0.700421 | 6.383706  | 1.563718  |
| P | 0.021117  | 0.309539  | -0.720992 |
| C | 3.629225  | -0.498701 | -2.427200 |
| C | 3.992050  | -1.837221 | -2.621951 |
| C | 4.567204  | 0.502005  | -2.713423 |
| C | 5.267974  | -2.169473 | -3.068918 |
| H | 3.263777  | -2.619749 | -2.415344 |
| C | 5.843985  | 0.168192  | -3.153242 |
| H | 4.298646  | 1.545360  | -2.558463 |
| C | 6.201006  | -1.168077 | -3.328262 |
| H | 5.534764  | -3.213718 | -3.209344 |
| H | 6.563324  | 0.956987  | -3.357058 |

|   |          |           |           |
|---|----------|-----------|-----------|
| H | 7.200521 | -1.426025 | -3.668665 |
| C | 2.443622 | -0.629512 | 0.593748  |
| H | 1.960670 | -0.014337 | 1.369432  |
| C | 3.926542 | -0.339931 | 0.641146  |
| C | 4.334952 | 0.996517  | 0.706500  |
| C | 4.904578 | -1.326540 | 0.573822  |
| C | 5.681252 | 1.329513  | 0.682325  |
| H | 3.581517 | 1.782930  | 0.760650  |
| C | 6.257618 | -0.987013 | 0.539227  |
| H | 4.606847 | -2.371505 | 0.523038  |
| C | 6.676768 | 0.344439  | 0.585732  |
| H | 5.966884 | 2.378546  | 0.732434  |
| H | 6.989276 | -1.786344 | 0.463552  |
| N | 2.109104 | -2.040050 | 0.922213  |
| H | 1.824187 | -2.558046 | 0.095205  |
| S | 0.988022 | -2.377189 | 2.155051  |
| O | 0.031266 | -1.194464 | 2.347099  |
| C | 2.072525 | -2.287062 | 3.681729  |
| C | 1.128453 | -2.661484 | 4.818143  |
| H | 1.691405 | -2.684862 | 5.756578  |
| H | 0.321756 | -1.931592 | 4.926811  |
| H | 0.683595 | -3.651980 | 4.675004  |
| C | 2.615916 | -0.883500 | 3.865138  |
| H | 1.819036 | -0.135022 | 3.807421  |
| H | 3.073101 | -0.806240 | 4.857371  |
| H | 3.389541 | -0.644508 | 3.129641  |
| C | 3.171857 | -3.317846 | 3.503571  |
| H | 3.756032 | -3.382703 | 4.427379  |
| H | 2.768573 | -4.315849 | 3.298903  |

|    |           |           |           |
|----|-----------|-----------|-----------|
| H  | 3.849305  | -3.042929 | 2.690293  |
| C  | 8.147032  | 0.757012  | 0.536776  |
| C  | 8.378224  | 1.674182  | -0.670507 |
| H  | 9.416320  | 2.025296  | -0.690841 |
| H  | 8.185216  | 1.143231  | -1.608794 |
| H  | 7.730125  | 2.556661  | -0.646257 |
| C  | 9.077705  | -0.446412 | 0.404064  |
| H  | 10.118300 | -0.108860 | 0.355656  |
| H  | 8.994471  | -1.130614 | 1.255582  |
| H  | 8.873086  | -1.017228 | -0.509123 |
| C  | 8.503766  | 1.520035  | 1.818852  |
| H  | 7.888799  | 2.418220  | 1.938129  |
| H  | 8.359729  | 0.896645  | 2.708008  |
| H  | 9.552650  | 1.837028  | 1.797200  |
| Cu | -1.187408 | -0.254032 | 0.920778  |
| C  | -3.739811 | -1.798278 | 0.479907  |
| H  | -4.833786 | -1.806050 | 0.508101  |
| N  | -3.085004 | -0.798339 | 0.986881  |
| C  | -3.883434 | 0.334411  | 1.395152  |
| C  | -3.107512 | 1.044776  | 2.458460  |
| O  | -1.875931 | 1.054847  | 2.496206  |
| O  | -3.870471 | 1.678218  | 3.343638  |
| C  | -3.167316 | 2.479398  | 4.309803  |
| H  | -2.564830 | 3.240835  | 3.807408  |
| H  | -3.938510 | 2.948525  | 4.917881  |
| H  | -2.521363 | 1.854252  | 4.929277  |
| C  | -3.099780 | -2.954422 | -0.121020 |
| C  | -3.898659 | -3.916866 | -0.758510 |
| C  | -1.707104 | -3.133028 | -0.109482 |



|   |           |           |           |
|---|-----------|-----------|-----------|
| C | -3.319871 | -5.020571 | -1.372880 |
| H | -4.978818 | -3.783543 | -0.769618 |
| C | -1.132453 | -4.240427 | -0.714693 |
| H | -1.098253 | -2.385892 | 0.397220  |
| C | -1.935423 | -5.186777 | -1.353701 |
| H | -3.948794 | -5.755705 | -1.867366 |
| H | -0.052992 | -4.374093 | -0.688027 |
| H | -1.482933 | -6.051490 | -1.831268 |
| C | -6.513305 | -0.909047 | -1.843853 |
| C | -6.280022 | -0.016187 | -0.747081 |
| C | -7.314444 | 0.173931  | 0.183996  |
| C | -8.532607 | -0.490446 | 0.012741  |
| C | -8.738906 | -1.349059 | -1.069899 |
| C | -7.721644 | -1.567778 | -2.012548 |
| C | -4.344224 | -0.139829 | -2.008102 |
| C | -4.949546 | 0.470674  | -0.862579 |
| H | -7.169061 | 0.845488  | 1.030216  |
| H | -9.331953 | -0.336459 | 0.734542  |
| H | -9.694209 | -1.854284 | -1.188254 |
| H | -7.875548 | -2.242148 | -2.852757 |
| H | -5.206371 | -1.506393 | -3.413927 |
| O | -3.201255 | -0.033226 | -2.491578 |
| N | -5.350982 | -0.959734 | -2.579810 |
| C | -4.171539 | 1.262178  | 0.107095  |
| H | -3.178057 | 1.432787  | -0.342376 |
| C | -4.758123 | 2.631478  | 0.542996  |
| H | -5.374140 | 2.472961  | 1.441143  |
| C | -5.646227 | 3.252785  | -0.527356 |
| H | -5.974061 | 4.252034  | -0.217314 |

|   |           |          |           |
|---|-----------|----------|-----------|
| H | -5.099137 | 3.362850 | -1.470981 |
| H | -6.537143 | 2.652984 | -0.730549 |
| C | -3.643560 | 3.618944 | 0.884671  |
| H | -4.033352 | 4.509266 | 1.391784  |
| H | -2.856924 | 3.199608 | 1.517358  |
| H | -3.147393 | 3.953998 | -0.034748 |
| H | -4.870316 | 0.043240 | 1.784659  |

Vibrational frequencies

|          |          |          |
|----------|----------|----------|
| 9.0546   | 18.0624  | 19.9293  |
| 21.6487  | 28.8891  | 29.9949  |
| 32.8241  | 38.0489  | 43.8419  |
| 44.7530  | 47.2740  | 50.7370  |
| 57.5564  | 59.7508  | 61.4820  |
| 63.4419  | 68.2823  | 72.2015  |
| 75.2824  | 78.9209  | 82.8917  |
| 89.9572  | 95.0691  | 100.8358 |
| 103.9827 | 106.5359 | 113.8956 |
| 115.6877 | 118.6708 | 121.2043 |
| 130.5902 | 135.5777 | 138.4475 |
| 142.0745 | 149.4835 | 153.9547 |
| 158.9950 | 167.3689 | 180.1934 |
| 180.4053 | 183.4862 | 186.6911 |
| 190.5691 | 207.4226 | 212.6709 |
| 213.9920 | 218.6815 | 224.6604 |
| 228.1697 | 229.3221 | 237.8067 |
| 242.4271 | 247.5026 | 251.4142 |
| 256.7511 | 260.6334 | 268.4901 |
| 270.8511 | 272.4043 | 273.5385 |
| 277.4650 | 289.6095 | 290.3308 |

|          |          |          |
|----------|----------|----------|
| 293.2390 | 299.6292 | 307.3652 |
| 311.8511 | 317.6491 | 324.9441 |
| 335.6910 | 336.3113 | 343.1313 |
| 345.4945 | 348.8009 | 355.6788 |
| 360.5987 | 361.6681 | 363.7479 |
| 372.4250 | 375.3932 | 380.5018 |
| 388.4652 | 407.3501 | 410.3396 |
| 414.3034 | 414.7296 | 422.6627 |
| 423.4851 | 424.7611 | 427.4535 |
| 429.0721 | 434.5786 | 448.2565 |
| 459.0247 | 473.7425 | 475.1441 |
| 486.1305 | 494.8532 | 496.7329 |
| 509.1992 | 510.2353 | 512.8045 |
| 519.9896 | 531.0184 | 535.1608 |
| 555.8182 | 557.8620 | 563.2905 |
| 569.6603 | 574.1711 | 579.1557 |
| 595.0321 | 599.3856 | 612.2446 |
| 618.1703 | 618.5618 | 628.2810 |
| 631.1643 | 633.7300 | 638.5253 |
| 653.9877 | 658.9936 | 662.7047 |
| 686.0821 | 700.8256 | 707.2590 |
| 713.3626 | 714.7110 | 716.0703 |
| 722.1533 | 726.3774 | 727.0909 |
| 732.3244 | 740.8393 | 748.3553 |
| 762.3163 | 767.8005 | 769.8079 |
| 772.7246 | 778.5843 | 779.6066 |
| 808.4952 | 817.8158 | 818.1678 |
| 820.3108 | 833.6498 | 848.6130 |
| 852.2305 | 855.8471 | 856.4874 |

|           |           |           |
|-----------|-----------|-----------|
| 861.1654  | 865.0211  | 866.0658  |
| 871.2264  | 879.5059  | 883.9025  |
| 886.5153  | 901.5099  | 909.9926  |
| 913.8889  | 913.9987  | 918.7189  |
| 919.7357  | 922.7462  | 939.5100  |
| 942.5933  | 947.9406  | 948.7726  |
| 952.6855  | 953.9902  | 956.5672  |
| 961.9775  | 962.6852  | 965.8959  |
| 966.6728  | 969.5372  | 969.8232  |
| 970.3948  | 974.6201  | 977.8109  |
| 987.5877  | 988.1754  | 992.4535  |
| 999.0820  | 1006.0475 | 1007.0720 |
| 1013.0270 | 1016.7173 | 1017.3365 |
| 1019.1420 | 1032.1422 | 1037.0282 |
| 1037.1264 | 1037.5059 | 1038.6130 |
| 1042.1420 | 1044.8683 | 1045.8637 |
| 1049.1158 | 1050.4544 | 1052.5844 |
| 1055.2083 | 1058.6241 | 1063.2430 |
| 1092.2696 | 1095.1041 | 1101.0142 |
| 1111.3848 | 1112.6960 | 1118.8249 |
| 1121.5039 | 1127.3359 | 1136.0866 |
| 1137.7359 | 1143.4672 | 1163.6393 |
| 1165.7148 | 1168.2431 | 1168.6131 |
| 1170.8163 | 1171.5645 | 1172.5974 |
| 1184.2985 | 1188.6196 | 1191.2422 |
| 1197.2659 | 1198.2945 | 1199.3840 |
| 1201.6723 | 1203.3568 | 1203.8647 |
| 1210.4766 | 1230.8170 | 1231.7583 |
| 1234.5747 | 1241.3115 | 1253.6571 |

|           |           |           |
|-----------|-----------|-----------|
| 1254.1498 | 1261.0903 | 1268.3221 |
| 1271.4703 | 1276.3223 | 1280.7909 |
| 1293.6559 | 1294.3367 | 1299.0203 |
| 1311.7067 | 1314.1744 | 1319.5659 |
| 1323.6437 | 1330.7765 | 1335.8486 |
| 1345.7813 | 1346.2192 | 1355.9628 |
| 1363.3153 | 1375.3485 | 1377.6772 |
| 1381.4094 | 1381.7633 | 1386.2573 |
| 1387.8236 | 1388.7481 | 1390.7885 |
| 1391.5860 | 1393.5831 | 1395.9409 |
| 1398.9640 | 1403.8079 | 1407.5658 |
| 1408.9548 | 1411.5624 | 1422.6447 |
| 1429.0503 | 1444.4323 | 1446.6874 |
| 1449.6655 | 1449.8363 | 1451.8411 |
| 1453.6626 | 1453.9423 | 1457.6944 |
| 1460.6576 | 1462.8046 | 1464.3734 |
| 1465.3348 | 1467.4352 | 1468.6530 |
| 1470.1011 | 1470.7477 | 1472.6164 |
| 1473.1643 | 1475.0857 | 1475.1854 |
| 1476.5827 | 1480.1378 | 1482.0669 |
| 1482.1754 | 1482.9289 | 1484.4000 |
| 1486.8358 | 1490.3653 | 1493.5660 |
| 1495.4948 | 1512.3919 | 1523.7053 |
| 1525.6036 | 1525.8088 | 1534.4642 |
| 1550.4087 | 1614.1504 | 1616.6395 |
| 1623.2928 | 1626.6492 | 1627.7393 |
| 1643.9163 | 1653.5403 | 1654.7784 |
| 1658.3829 | 1662.5313 | 1671.7429 |
| 1675.5759 | 1698.3003 | 1722.3314 |

|           |           |           |
|-----------|-----------|-----------|
| 1738.1045 | 3001.6994 | 3039.0904 |
| 3041.0542 | 3046.9463 | 3048.8653 |
| 3049.1200 | 3051.7930 | 3053.7375 |
| 3054.3837 | 3055.6437 | 3057.2967 |
| 3057.4809 | 3059.9075 | 3062.1070 |
| 3075.0742 | 3089.3245 | 3120.0034 |
| 3130.4887 | 3133.3090 | 3133.3322 |
| 3138.4447 | 3142.7134 | 3145.3362 |
| 3145.8643 | 3146.0563 | 3146.5970 |
| 3149.1657 | 3149.9510 | 3154.9378 |
| 3161.5886 | 3161.8005 | 3161.8582 |
| 3164.4084 | 3164.4204 | 3166.0368 |
| 3168.6513 | 3169.1504 | 3172.9602 |
| 3174.5885 | 3176.2787 | 3177.2304 |
| 3177.5459 | 3178.8612 | 3181.5251 |
| 3183.2832 | 3184.3289 | 3189.2624 |
| 3189.6440 | 3193.4417 | 3196.3318 |
| 3196.4268 | 3198.3151 | 3198.9006 |
| 3200.5417 | 3200.9864 | 3205.0175 |
| 3209.3314 | 3210.3115 | 3217.0192 |
| 3219.6845 | 3221.3699 | 3222.1246 |
| 3226.5051 | 3563.3756 | 3667.0762 |

## **MIS**

Zero-point correction= 1.101664

Thermal correction to Energy= 1.167157

Thermal correction to Enthalpy= 1.168101

Thermal correction to Gibbs Free Energy= 1.002802

Sum of electronic and zero-point Energies= -5054.853266

Sum of electronic and thermal Energies= -5054.787773

Sum of electronic and thermal Enthalpies= -5054.786829

Sum of electronic and thermal Free Energies= -5054.952129

Cartesian coordinates

|   |           |           |           |
|---|-----------|-----------|-----------|
| C | -1.954845 | -1.020177 | -0.128887 |
| C | -2.555888 | -1.998179 | -2.249736 |
| C | -2.997643 | -1.406565 | -0.894177 |
| C | -1.330721 | -1.133974 | -2.598553 |
| H | -0.799895 | -1.484133 | -3.490105 |
| H | -1.590119 | -0.075465 | -2.714561 |
| C | -0.729649 | -3.271018 | -1.336469 |
| C | -1.934324 | -3.370143 | -1.945039 |
| C | -3.621645 | -2.017940 | -3.329888 |
| H | -4.514358 | -2.575554 | -3.029391 |
| H | -3.938940 | -1.001651 | -3.582405 |
| H | -3.229604 | -2.476484 | -4.243435 |
| C | -2.730428 | -4.598658 | -2.211858 |
| H | -2.781679 | -4.837370 | -3.281657 |
| H | -2.328628 | -5.473323 | -1.695340 |
| H | -3.768043 | -4.453569 | -1.884882 |
| C | 0.155186  | -4.363749 | -0.936933 |
| C | 0.259155  | -5.533825 | -1.714040 |
| C | 0.939587  | -4.272099 | 0.223098  |
| C | 1.074196  | -6.587532 | -1.315884 |
| H | -0.285159 | -5.602865 | -2.652105 |
| C | 1.747536  | -5.330983 | 0.622800  |
| H | 0.925064  | -3.349986 | 0.799355  |
| C | 1.813944  | -6.497613 | -0.137492 |
| H | 1.138827  | -7.479397 | -1.933960 |

|   |           |           |           |
|---|-----------|-----------|-----------|
| H | 2.336649  | -5.237444 | 1.532775  |
| H | 2.449206  | -7.322519 | 0.174411  |
| P | -0.389085 | -1.452621 | -1.045199 |
| C | -4.415295 | -1.389900 | -0.480914 |
| C | -5.354305 | -0.532062 | -1.070674 |
| C | -4.837152 | -2.238159 | 0.552935  |
| C | -6.671727 | -0.510195 | -0.623395 |
| H | -5.037006 | 0.148178  | -1.858533 |
| C | -6.158786 | -2.224740 | 0.990536  |
| H | -4.115380 | -2.914094 | 1.008968  |
| C | -7.078151 | -1.354957 | 0.408529  |
| H | -7.383706 | 0.173694  | -1.078299 |
| H | -6.468591 | -2.890492 | 1.791880  |
| H | -8.107805 | -1.336375 | 0.754837  |
| C | -2.107312 | -0.313072 | 1.208496  |
| H | -2.516561 | -1.016625 | 1.942132  |
| C | -3.092675 | 0.834887  | 1.087407  |
| C | -4.203011 | 0.926301  | 1.919755  |
| C | -2.901037 | 1.826678  | 0.119194  |
| C | -5.126210 | 1.959966  | 1.768029  |
| H | -4.372830 | 0.156061  | 2.670891  |
| C | -3.814088 | 2.862187  | -0.019947 |
| H | -2.033941 | 1.769792  | -0.540910 |
| C | -4.958599 | 2.943044  | 0.789419  |
| H | -5.997005 | 1.978519  | 2.417226  |
| H | -3.644389 | 3.617156  | -0.785641 |
| N | -0.903077 | 0.292635  | 1.815214  |
| H | -0.516639 | 1.047861  | 1.243354  |
| S | 0.441849  | -0.422005 | 2.546907  |



|    |           |           |           |
|----|-----------|-----------|-----------|
| O  | 1.189610  | -1.410761 | 1.661773  |
| C  | -0.369237 | -1.499684 | 3.857415  |
| C  | 0.783780  | -1.792199 | 4.816768  |
| H  | 0.428185  | -2.438824 | 5.625626  |
| H  | 1.602686  | -2.311650 | 4.309376  |
| H  | 1.181493  | -0.877338 | 5.268370  |
| C  | -0.860146 | -2.808048 | 3.259280  |
| H  | -0.037803 | -3.346810 | 2.781489  |
| H  | -1.252158 | -3.439904 | 4.064171  |
| H  | -1.654870 | -2.688831 | 2.517821  |
| C  | -1.451836 | -0.705021 | 4.568152  |
| H  | -1.080727 | 0.268076  | 4.906344  |
| H  | -2.330381 | -0.526830 | 3.942525  |
| H  | -1.777980 | -1.258802 | 5.455893  |
| C  | -5.962075 | 4.071382  | 0.562393  |
| C  | -6.441411 | 4.038714  | -0.894840 |
| H  | -7.177690 | 4.830560  | -1.073602 |
| H  | -5.618034 | 4.190882  | -1.599860 |
| H  | -6.914154 | 3.080014  | -1.136234 |
| C  | -5.278829 | 5.417455  | 0.834108  |
| H  | -5.975013 | 6.246098  | 0.660438  |
| H  | -4.928444 | 5.483206  | 1.869786  |
| H  | -4.413456 | 5.568184  | 0.180068  |
| C  | -7.183282 | 3.946181  | 1.470759  |
| H  | -7.717854 | 3.003420  | 1.305354  |
| H  | -6.916663 | 4.000580  | 2.531656  |
| H  | -7.883389 | 4.762904  | 1.265970  |
| Cu | 1.450052  | -0.487563 | -0.578731 |
| C  | 3.237986  | 1.398996  | -2.118039 |

|   |           |           |           |
|---|-----------|-----------|-----------|
| H | 4.233715  | 1.858446  | -2.142480 |
| N | 3.072316  | 0.265933  | -1.499170 |
| C | 4.216823  | -0.121318 | -0.697434 |
| C | 4.130558  | -1.611381 | -0.547461 |
| O | 3.065790  | -2.157879 | -0.306427 |
| O | 5.288170  | -2.259504 | -0.693966 |
| C | 5.208962  | -3.684865 | -0.501628 |
| H | 4.483972  | -4.124758 | -1.189647 |
| H | 6.208741  | -4.064933 | -0.703504 |
| H | 4.915849  | -3.916787 | 0.525381  |
| C | 2.202800  | 2.126125  | -2.824959 |
| C | 0.842409  | 1.787328  | -2.734499 |
| C | 2.573512  | 3.243128  | -3.592102 |
| C | -0.110520 | 2.523340  | -3.423665 |
| H | 0.568137  | 0.957438  | -2.088332 |
| C | 1.616092  | 3.980711  | -4.276519 |
| H | 3.623851  | 3.523207  | -3.642135 |
| C | 0.270874  | 3.619622  | -4.199641 |
| H | -1.161505 | 2.252063  | -3.349282 |
| H | 1.915630  | 4.840426  | -4.869217 |
| H | -0.479664 | 4.196934  | -4.732786 |
| C | 3.221387  | 4.233724  | 0.526396  |
| C | 4.233830  | 3.233833  | 0.697183  |
| C | 5.554431  | 3.679547  | 0.880792  |
| C | 5.836159  | 5.044653  | 0.874337  |
| C | 4.826490  | 5.996382  | 0.692441  |
| C | 3.500195  | 5.593363  | 0.519898  |
| C | 2.203097  | 2.207339  | 0.458427  |
| C | 3.580336  | 1.961218  | 0.647764  |

|   |          |           |           |
|---|----------|-----------|-----------|
| H | 6.361754 | 2.969394  | 1.034578  |
| H | 6.862969 | 5.374673  | 1.015458  |
| H | 5.071239 | 7.055134  | 0.687935  |
| H | 2.704233 | 6.321992  | 0.384258  |
| O | 1.229993 | 1.379859  | 0.353361  |
| N | 2.015544 | 3.582076  | 0.384511  |
| C | 4.061713 | 0.558511  | 0.749615  |
| H | 3.228308 | -0.014528 | 1.185665  |
| C | 5.305239 | 0.344326  | 1.651776  |
| H | 5.322874 | 1.203539  | 2.335781  |
| C | 6.643004 | 0.319821  | 0.916534  |
| H | 7.469705 | 0.398989  | 1.630333  |
| H | 6.781239 | -0.614702 | 0.362712  |
| H | 6.747959 | 1.141232  | 0.200305  |
| C | 5.155100 | -0.905672 | 2.512613  |
| H | 6.001851 | -1.016037 | 3.199091  |
| H | 4.238740 | -0.871535 | 3.111911  |
| H | 5.116671 | -1.819055 | 1.906565  |
| H | 5.163994 | 0.192305  | -1.151409 |
| H | 1.118431 | 4.019979  | 0.244806  |

Vibrational frequencies

|         |         |          |
|---------|---------|----------|
| 17.5244 | 20.8012 | 23.2039  |
| 27.5795 | 33.5496 | 40.1276  |
| 42.8843 | 47.6949 | 53.4318  |
| 55.6998 | 57.4224 | 60.1244  |
| 63.2744 | 63.4178 | 69.4892  |
| 72.4837 | 76.4720 | 77.8531  |
| 84.8722 | 89.1577 | 91.1266  |
| 93.8795 | 96.5248 | 108.4123 |

|          |          |          |
|----------|----------|----------|
| 110.9071 | 118.6797 | 121.4025 |
| 125.6231 | 128.7178 | 130.2645 |
| 133.3643 | 142.0210 | 145.4377 |
| 149.9871 | 155.5007 | 158.8462 |
| 170.0187 | 174.0570 | 183.4068 |
| 187.7597 | 188.4185 | 194.5097 |
| 198.5427 | 203.2887 | 213.0926 |
| 224.6506 | 227.3626 | 228.8520 |
| 231.0783 | 233.8343 | 242.6633 |
| 259.0472 | 262.6994 | 264.2713 |
| 267.7601 | 270.4596 | 272.8845 |
| 276.9465 | 279.7533 | 282.5248 |
| 287.8109 | 296.3268 | 299.5079 |
| 302.1294 | 305.1116 | 312.5264 |
| 321.0060 | 327.8332 | 330.8643 |
| 334.0548 | 338.5142 | 341.4654 |
| 344.4155 | 345.7208 | 347.3709 |
| 351.8500 | 359.2101 | 361.4571 |
| 366.2309 | 368.7352 | 378.6919 |
| 390.3599 | 401.0926 | 405.3086 |
| 411.6888 | 417.5526 | 418.9939 |
| 423.1062 | 426.5305 | 427.4710 |
| 431.8269 | 437.1881 | 443.8533 |
| 454.4958 | 466.2653 | 469.6392 |
| 475.1327 | 478.8940 | 487.7386 |
| 500.0712 | 511.5994 | 521.6744 |
| 523.1662 | 531.7164 | 533.8788 |
| 541.8329 | 549.4343 | 560.7757 |
| 562.4990 | 570.2647 | 580.6066 |

|           |           |           |
|-----------|-----------|-----------|
| 592.1531  | 601.7893  | 611.6602  |
| 620.6353  | 627.3035  | 628.5260  |
| 633.0359  | 638.6532  | 647.4597  |
| 650.0330  | 661.8507  | 667.1948  |
| 690.0046  | 690.3682  | 710.2031  |
| 712.4235  | 713.6397  | 716.6896  |
| 720.4090  | 720.6024  | 733.7932  |
| 743.5464  | 752.7423  | 754.0523  |
| 758.8398  | 763.0050  | 774.3032  |
| 776.5470  | 777.2861  | 793.2176  |
| 805.9349  | 811.1182  | 816.2157  |
| 821.9252  | 830.9132  | 849.2324  |
| 855.3665  | 860.2389  | 860.9628  |
| 863.3024  | 863.7868  | 870.9072  |
| 876.2562  | 878.3920  | 883.3588  |
| 895.1993  | 901.2684  | 903.5256  |
| 912.7061  | 917.3410  | 924.9305  |
| 928.0262  | 928.1266  | 934.9057  |
| 935.7199  | 940.5190  | 950.2956  |
| 951.5959  | 954.3844  | 956.0478  |
| 958.5688  | 961.2937  | 961.8613  |
| 963.1490  | 967.3986  | 971.5956  |
| 973.1980  | 975.6799  | 979.6459  |
| 981.3684  | 989.0738  | 992.2308  |
| 1001.1021 | 1001.4798 | 1015.8516 |
| 1016.3705 | 1017.1945 | 1020.7196 |
| 1022.5777 | 1027.3129 | 1028.8265 |
| 1036.1985 | 1037.7018 | 1039.3156 |
| 1043.7478 | 1045.7523 | 1049.4782 |

|           |           |           |
|-----------|-----------|-----------|
| 1050.6681 | 1052.7170 | 1057.1647 |
| 1058.0677 | 1061.0871 | 1069.2869 |
| 1076.2137 | 1103.6469 | 1110.5104 |
| 1111.4662 | 1113.3680 | 1119.7139 |
| 1122.7225 | 1128.4916 | 1137.9831 |
| 1141.1227 | 1149.9990 | 1156.9081 |
| 1157.0166 | 1165.2695 | 1171.7682 |
| 1172.8050 | 1173.3236 | 1174.9825 |
| 1187.2872 | 1187.6194 | 1193.9118 |
| 1194.7433 | 1201.6478 | 1204.4887 |
| 1205.9533 | 1207.5309 | 1209.4433 |
| 1213.2708 | 1217.8475 | 1232.9846 |
| 1234.7294 | 1239.8424 | 1252.9420 |
| 1256.4373 | 1257.9909 | 1266.3538 |
| 1266.8738 | 1270.9122 | 1272.0786 |
| 1287.5727 | 1288.9242 | 1300.1567 |
| 1303.2330 | 1312.5373 | 1315.7751 |
| 1327.5070 | 1335.2977 | 1338.8931 |
| 1346.5132 | 1348.2107 | 1351.3756 |
| 1365.0412 | 1371.6861 | 1376.9161 |
| 1377.0182 | 1383.5429 | 1385.1918 |
| 1385.3382 | 1388.5934 | 1390.0377 |
| 1390.5023 | 1392.3458 | 1398.0902 |
| 1402.6785 | 1406.6788 | 1407.4283 |
| 1411.3637 | 1412.3002 | 1412.9983 |
| 1424.5085 | 1429.5923 | 1438.7563 |
| 1448.2625 | 1449.5823 | 1451.0772 |
| 1452.0753 | 1455.1936 | 1459.4716 |
| 1463.3318 | 1465.8896 | 1465.9357 |

|           |           |           |
|-----------|-----------|-----------|
| 1467.6366 | 1468.1948 | 1470.1314 |
| 1472.4977 | 1472.8456 | 1475.9110 |
| 1477.2055 | 1479.0541 | 1480.0471 |
| 1482.3841 | 1482.7159 | 1482.9007 |
| 1484.3617 | 1486.0191 | 1488.4891 |
| 1488.7009 | 1497.4949 | 1499.0277 |
| 1502.9600 | 1511.4535 | 1523.9723 |
| 1526.4732 | 1532.0742 | 1534.9624 |
| 1552.6148 | 1608.9463 | 1615.6841 |
| 1624.4419 | 1627.7049 | 1628.1126 |
| 1628.9914 | 1649.2429 | 1651.1307 |
| 1658.7458 | 1663.9527 | 1664.1432 |
| 1672.0838 | 1675.6844 | 1686.4481 |
| 1788.7812 | 3029.9470 | 3033.5544 |
| 3038.3897 | 3041.4960 | 3045.9814 |
| 3048.9881 | 3049.9324 | 3052.9427 |
| 3054.5576 | 3055.6838 | 3058.2477 |
| 3058.8623 | 3064.2341 | 3074.6522 |
| 3078.4435 | 3079.2249 | 3088.7441 |
| 3116.6721 | 3128.9729 | 3136.1768 |
| 3141.8675 | 3143.2316 | 3145.2672 |
| 3146.0157 | 3147.3100 | 3148.7862 |
| 3149.6437 | 3150.1730 | 3152.5168 |
| 3152.7537 | 3156.2923 | 3157.1889 |
| 3158.4917 | 3158.6071 | 3164.0053 |
| 3170.3336 | 3170.3793 | 3170.8163 |
| 3171.1824 | 3171.6393 | 3174.3453 |
| 3175.1991 | 3175.2505 | 3177.9495 |
| 3179.7511 | 3183.8966 | 3186.0877 |

|           |           |           |
|-----------|-----------|-----------|
| 3187.2362 | 3188.0065 | 3189.0117 |
| 3189.9386 | 3197.3018 | 3198.4682 |
| 3199.4999 | 3200.2491 | 3202.7300 |
| 3207.6634 | 3210.5697 | 3212.3843 |
| 3214.7594 | 3215.8962 | 3217.4841 |
| 3230.9497 | 3488.5645 | 3669.7235 |

## TS2R

Zero-point correction= 1.101093

Thermal correction to Energy= 1.165779

Thermal correction to Enthalpy= 1.166723

Thermal correction to Gibbs Free Energy= 1.003938

Sum of electronic and zero-point Energies= -5054.839163

Sum of electronic and thermal Energies= -5054.774477

Sum of electronic and thermal Enthalpies= -5054.773533

Sum of electronic and thermal Free Energies= -5054.936319

Cartesian coordinates

|   |           |           |           |
|---|-----------|-----------|-----------|
| C | -1.948509 | -1.024092 | -0.653303 |
| C | -1.459793 | -3.216369 | 0.194273  |
| C | -2.498259 | -2.231634 | -0.416798 |
| C | -0.177429 | -2.865825 | -0.591578 |
| H | 0.705140  | -3.386223 | -0.205450 |
| H | -0.279198 | -3.042082 | -1.668414 |
| C | -0.425621 | -1.555306 | 1.597383  |
| C | -1.118957 | -2.713984 | 1.616404  |
| C | -1.846761 | -4.681012 | 0.112018  |
| H | -2.746289 | -4.910308 | 0.692578  |
| H | -2.046295 | -4.970625 | -0.924749 |
| H | -1.037234 | -5.314753 | 0.487837  |



|   |           |           |           |
|---|-----------|-----------|-----------|
| C | -1.614930 | -3.452613 | 2.808521  |
| H | -1.038960 | -4.370944 | 2.982387  |
| H | -1.553827 | -2.849822 | 3.718298  |
| H | -2.655478 | -3.772964 | 2.676754  |
| C | 0.001310  | -0.715175 | 2.711755  |
| C | -0.117791 | 0.681472  | 2.614022  |
| C | 0.539572  | -1.252201 | 3.892296  |
| C | 0.256820  | 1.507597  | 3.667514  |
| H | -0.508729 | 1.116990  | 1.695918  |
| C | 0.919505  | -0.424238 | 4.943591  |
| H | 0.689224  | -2.326348 | 3.967461  |
| C | 0.773442  | 0.958346  | 4.840260  |
| H | 0.148439  | 2.585559  | 3.572757  |
| H | 1.341463  | -0.860432 | 5.845478  |
| H | 1.073935  | 1.603656  | 5.661516  |
| P | -0.166968 | -1.075140 | -0.177164 |
| C | -3.905888 | -2.610806 | -0.608184 |
| C | -4.498484 | -2.555974 | -1.877043 |
| C | -4.693107 | -3.015880 | 0.479873  |
| C | -5.837951 | -2.892938 | -2.053012 |
| H | -3.892345 | -2.262665 | -2.731776 |
| C | -6.033840 | -3.338016 | 0.306836  |
| H | -4.251641 | -3.040035 | 1.474316  |
| C | -6.611381 | -3.279961 | -0.961317 |
| H | -6.278644 | -2.848355 | -3.045482 |
| H | -6.631751 | -3.631311 | 1.165619  |
| H | -7.658746 | -3.536072 | -1.096433 |
| C | -2.574912 | 0.296693  | -1.020627 |
| H | -1.898397 | 1.053439  | -0.594559 |

|   |           |           |           |
|---|-----------|-----------|-----------|
| C | -3.943868 | 0.514756  | -0.407133 |
| C | -4.076998 | 0.425095  | 0.983906  |
| C | -5.077425 | 0.812749  | -1.156369 |
| C | -5.305966 | 0.623780  | 1.594533  |
| H | -3.204359 | 0.180438  | 1.590531  |
| C | -6.313384 | 1.011948  | -0.538124 |
| H | -4.996503 | 0.877528  | -2.238513 |
| C | -6.457305 | 0.921624  | 0.847321  |
| H | -5.375508 | 0.540862  | 2.677610  |
| H | -7.174094 | 1.235483  | -1.162023 |
| N | -2.573089 | 0.547893  | -2.484067 |
| H | -2.656628 | -0.317419 | -3.010043 |
| S | -1.339854 | 1.472425  | -3.205713 |
| O | -0.037804 | 1.386161  | -2.419147 |
| C | -1.948834 | 3.217593  | -2.865541 |
| C | -0.855353 | 4.094185  | -3.464164 |
| H | -1.135718 | 5.147247  | -3.356277 |
| H | 0.100339  | 3.940319  | -2.953868 |
| H | -0.708592 | 3.898433  | -4.532129 |
| C | -2.086725 | 3.478896  | -1.376937 |
| H | -1.178177 | 3.193712  | -0.833291 |
| H | -2.246513 | 4.552145  | -1.220677 |
| H | -2.949230 | 2.958904  | -0.947920 |
| C | -3.263871 | 3.380143  | -3.604968 |
| H | -3.599376 | 4.419938  | -3.525292 |
| H | -3.166056 | 3.147279  | -4.671117 |
| H | -4.043803 | 2.740969  | -3.181271 |
| C | -7.794024 | 1.112932  | 1.560978  |
| C | -8.173410 | -0.193705 | 2.269828  |

|    |           |           |           |
|----|-----------|-----------|-----------|
| H  | -9.118312 | -0.076009 | 2.812939  |
| H  | -8.299163 | -1.008862 | 1.548928  |
| H  | -7.409596 | -0.501905 | 2.991922  |
| C  | -8.917809 | 1.478452  | 0.593322  |
| H  | -9.854068 | 1.612072  | 1.145604  |
| H  | -8.713904 | 2.413067  | 0.059197  |
| H  | -9.087812 | 0.694167  | -0.152262 |
| C  | -7.666187 | 2.231277  | 2.602585  |
| H  | -6.901217 | 2.005704  | 3.352636  |
| H  | -7.401388 | 3.185142  | 2.133254  |
| H  | -8.615735 | 2.370204  | 3.132028  |
| Cu | 1.111854  | 0.403566  | -0.912007 |
| C  | 4.125811  | 0.266372  | -1.334986 |
| H  | 5.035629  | 0.857660  | -1.535226 |
| N  | 2.977322  | 0.963783  | -1.165917 |
| C  | 3.334194  | 2.046523  | -0.287160 |
| C  | 2.117764  | 2.862205  | 0.023875  |
| O  | 0.991462  | 2.380912  | 0.084249  |
| O  | 2.366008  | 4.153227  | 0.248164  |
| C  | 1.229096  | 4.947687  | 0.626336  |
| H  | 0.674471  | 4.471207  | 1.437500  |
| H  | 1.632029  | 5.905879  | 0.950359  |
| H  | 0.564697  | 5.090037  | -0.229764 |
| C  | 4.169289  | -1.049661 | -1.985689 |
| C  | 5.385058  | -1.537251 | -2.483204 |
| C  | 3.042509  | -1.878324 | -2.022246 |
| C  | 5.467399  | -2.820607 | -3.014620 |
| H  | 6.269551  | -0.902635 | -2.438797 |
| C  | 3.120181  | -3.154639 | -2.563764 |

|   |          |           |           |
|---|----------|-----------|-----------|
| H | 2.128575 | -1.475100 | -1.589676 |
| C | 4.334534 | -3.632505 | -3.059687 |
| H | 6.417033 | -3.189087 | -3.393996 |
| H | 2.236289 | -3.787933 | -2.590737 |
| H | 4.397958 | -4.634358 | -3.476863 |
| C | 6.220833 | -1.599997 | 0.732443  |
| C | 6.075048 | -0.192360 | 0.608321  |
| C | 7.224329 | 0.571106  | 0.397826  |
| C | 8.474572 | -0.054226 | 0.333583  |
| C | 8.588178 | -1.438257 | 0.462342  |
| C | 7.453845 | -2.232069 | 0.661495  |
| C | 3.978791 | -1.168621 | 0.916379  |
| C | 4.648846 | 0.104754  | 0.600517  |
| H | 7.158166 | 1.649999  | 0.288435  |
| H | 9.366456 | 0.547506  | 0.178168  |
| H | 9.565807 | -1.909821 | 0.404632  |
| H | 7.532201 | -3.312201 | 0.755135  |
| H | 4.768277 | -3.134627 | 1.017740  |
| O | 2.780219 | -1.392447 | 1.097610  |
| N | 4.965403 | -2.152164 | 0.903949  |
| C | 3.945352 | 1.371172  | 1.031757  |
| H | 3.060314 | 1.024719  | 1.589205  |
| C | 4.751484 | 2.320957  | 1.956376  |
| H | 5.557570 | 1.716212  | 2.394124  |
| C | 3.882564 | 2.817713  | 3.108158  |
| H | 4.450663 | 3.465127  | 3.785754  |
| H | 3.028790 | 3.402355  | 2.741360  |
| H | 3.481693 | 1.984338  | 3.694276  |
| C | 5.412301 | 3.509788  | 1.261213  |

|   |          |          |           |
|---|----------|----------|-----------|
| H | 6.116106 | 3.999821 | 1.942502  |
| H | 5.970326 | 3.227905 | 0.362886  |
| H | 4.674289 | 4.258589 | 0.957237  |
| H | 4.112626 | 2.698345 | -0.714302 |

Vibrational frequencies

|           |          |          |
|-----------|----------|----------|
| -295.8080 | 12.9549  | 21.1326  |
| 32.3341   | 34.3366  | 37.0280  |
| 41.7608   | 44.5455  | 46.0302  |
| 52.5598   | 52.8423  | 55.2256  |
| 63.2190   | 63.2892  | 69.9551  |
| 71.7826   | 73.6570  | 77.2454  |
| 82.3597   | 86.2787  | 92.8176  |
| 96.3365   | 102.0669 | 104.6061 |
| 106.6902  | 113.2653 | 116.2691 |
| 120.5838  | 122.9757 | 124.5220 |
| 131.1313  | 133.4126 | 137.2009 |
| 144.9707  | 156.1967 | 159.3943 |
| 161.2960  | 172.5458 | 175.5850 |
| 182.6388  | 183.8488 | 192.1500 |
| 197.1260  | 209.0880 | 212.5386 |
| 219.4633  | 221.3476 | 228.0006 |
| 230.2337  | 234.2936 | 242.4258 |
| 250.7805  | 257.0478 | 258.0041 |
| 259.4464  | 261.7116 | 265.7497 |
| 270.9558  | 273.6143 | 278.4490 |
| 281.6112  | 285.4325 | 290.5913 |
| 298.1866  | 304.4939 | 317.1809 |
| 317.5653  | 323.5509 | 328.8766 |
| 332.1851  | 335.0463 | 341.3161 |

|          |          |          |
|----------|----------|----------|
| 342.8156 | 344.9864 | 349.5507 |
| 353.3243 | 363.9551 | 366.2117 |
| 373.4321 | 377.3314 | 386.6837 |
| 397.2209 | 406.6054 | 412.0395 |
| 416.4010 | 422.4664 | 424.1037 |
| 426.0448 | 431.5614 | 432.4323 |
| 437.7930 | 445.2212 | 450.5638 |
| 465.3280 | 471.1351 | 473.0844 |
| 487.6223 | 497.5383 | 507.3939 |
| 509.6050 | 513.4771 | 522.8615 |
| 533.1062 | 544.6620 | 553.8674 |
| 556.6670 | 564.8147 | 567.5755 |
| 577.7607 | 583.4775 | 588.2439 |
| 595.4320 | 613.1735 | 616.1386 |
| 617.3056 | 627.8583 | 628.9872 |
| 633.4363 | 639.5001 | 641.5090 |
| 650.7703 | 652.8853 | 659.9806 |
| 684.8016 | 701.9479 | 706.9543 |
| 707.9017 | 720.1704 | 723.0481 |
| 727.2222 | 729.3756 | 739.7901 |
| 750.1687 | 756.4802 | 764.9999 |
| 766.7080 | 770.3232 | 772.7962 |
| 777.3631 | 787.3357 | 800.0261 |
| 807.0969 | 819.1770 | 820.9569 |
| 834.8611 | 844.6955 | 846.4731 |
| 848.9591 | 856.7198 | 865.6249 |
| 868.3865 | 869.4035 | 881.5832 |
| 884.6942 | 891.0044 | 901.2163 |
| 901.6547 | 903.4378 | 910.3942 |

|           |           |           |
|-----------|-----------|-----------|
| 912.8391  | 918.7481  | 929.6740  |
| 931.0364  | 935.8408  | 942.4024  |
| 943.2040  | 944.1592  | 945.7202  |
| 950.2212  | 952.1027  | 952.4120  |
| 960.8688  | 962.2940  | 964.7700  |
| 969.3251  | 970.2721  | 975.5517  |
| 976.6016  | 983.1075  | 987.2749  |
| 989.1189  | 992.8810  | 1000.2791 |
| 1005.5383 | 1008.8823 | 1013.5147 |
| 1017.1790 | 1017.8169 | 1021.5923 |
| 1030.4898 | 1032.9460 | 1034.1961 |
| 1036.3708 | 1037.7269 | 1039.0890 |
| 1043.5672 | 1044.8168 | 1047.4478 |
| 1052.8767 | 1054.0196 | 1056.6032 |
| 1058.1791 | 1076.5616 | 1085.8681 |
| 1093.3323 | 1096.7402 | 1101.4131 |
| 1102.1787 | 1103.7370 | 1105.8685 |
| 1116.9924 | 1132.5431 | 1133.6760 |
| 1142.0293 | 1152.5089 | 1156.9804 |
| 1159.7636 | 1162.9901 | 1163.8773 |
| 1164.9539 | 1166.5544 | 1168.9590 |
| 1179.5074 | 1181.6035 | 1188.4810 |
| 1190.3227 | 1192.1048 | 1194.2455 |
| 1201.3933 | 1201.7311 | 1207.5025 |
| 1218.2069 | 1230.9133 | 1234.4702 |
| 1237.3932 | 1241.5106 | 1242.3613 |
| 1249.2417 | 1257.3541 | 1263.2652 |
| 1267.4397 | 1273.9699 | 1288.9600 |
| 1295.2167 | 1299.1341 | 1309.5134 |

|           |           |           |
|-----------|-----------|-----------|
| 1312.5549 | 1319.6258 | 1327.2863 |
| 1327.6768 | 1330.0899 | 1337.5518 |
| 1338.2951 | 1340.1428 | 1349.1689 |
| 1350.0551 | 1367.1509 | 1369.8660 |
| 1377.6156 | 1379.0165 | 1380.0803 |
| 1382.8440 | 1383.4431 | 1384.4622 |
| 1387.3184 | 1393.1195 | 1395.3207 |
| 1395.7607 | 1399.6052 | 1400.2075 |
| 1400.4096 | 1404.9463 | 1405.3725 |
| 1408.5196 | 1440.1420 | 1442.7189 |
| 1444.8154 | 1449.4941 | 1452.4114 |
| 1453.8668 | 1455.5078 | 1455.9271 |
| 1459.4882 | 1461.1273 | 1462.8610 |
| 1464.6603 | 1465.1191 | 1468.4560 |
| 1470.3995 | 1470.6859 | 1472.7790 |
| 1472.9882 | 1473.4123 | 1473.8283 |
| 1475.5541 | 1475.8443 | 1480.1903 |
| 1480.3975 | 1482.5137 | 1484.3246 |
| 1492.5218 | 1496.9403 | 1497.9327 |
| 1507.1685 | 1509.6401 | 1513.1555 |
| 1519.5411 | 1526.4780 | 1527.7646 |
| 1537.8962 | 1547.6814 | 1622.5117 |
| 1624.6517 | 1630.3381 | 1632.7755 |
| 1637.3116 | 1654.3405 | 1655.6738 |
| 1661.1097 | 1661.9536 | 1673.3957 |
| 1682.8665 | 1705.6703 | 1754.5549 |
| 1767.0888 | 2965.8609 | 2989.2984 |
| 2999.4739 | 3036.5376 | 3040.7407 |
| 3040.8211 | 3042.2336 | 3044.8795 |



|           |           |           |
|-----------|-----------|-----------|
| 3045.7213 | 3049.1751 | 3053.3454 |
| 3055.5674 | 3060.6306 | 3061.1634 |
| 3063.3296 | 3073.8500 | 3080.3941 |
| 3114.1251 | 3123.4598 | 3131.2475 |
| 3138.9263 | 3140.8544 | 3143.9431 |
| 3144.6179 | 3145.1692 | 3145.7165 |
| 3150.6029 | 3152.6958 | 3153.2610 |
| 3154.3382 | 3154.7758 | 3158.4869 |
| 3158.7124 | 3170.5307 | 3172.1172 |
| 3172.9954 | 3173.5570 | 3174.0053 |
| 3174.0577 | 3175.1736 | 3175.5401 |
| 3176.1203 | 3176.1889 | 3176.6298 |
| 3178.7282 | 3185.5612 | 3187.9023 |
| 3189.4454 | 3192.1540 | 3192.6205 |
| 3193.9300 | 3195.2054 | 3196.3258 |
| 3198.5881 | 3200.3711 | 3202.7144 |
| 3206.2781 | 3209.2075 | 3209.2712 |
| 3212.1599 | 3216.0766 | 3219.4956 |
| 3225.5181 | 3568.5907 | 3667.0647 |

## TS2S

Zero-point correction= 1.101708

Thermal correction to Energy= 1.166051

Thermal correction to Enthalpy= 1.166995

Thermal correction to Gibbs Free Energy= 1.005928

Sum of electronic and zero-point Energies= -5054.836799

Sum of electronic and thermal Energies= -5054.772456

Sum of electronic and thermal Enthalpies= -5054.771512

Sum of electronic and thermal Free Energies= -5054.932580

Cartesian coordinates

|   |           |           |           |
|---|-----------|-----------|-----------|
| C | -2.054387 | -0.709494 | -0.319840 |
| C | -2.866773 | -1.368618 | -2.496103 |
| C | -3.159546 | -0.799748 | -1.090764 |
| C | -1.471524 | -0.795346 | -2.803276 |
| H | -1.036374 | -1.197696 | -3.723584 |
| H | -1.473542 | 0.299357  | -2.839579 |
| C | -1.404420 | -3.098112 | -1.696601 |
| C | -2.600470 | -2.867861 | -2.286920 |
| C | -3.906003 | -1.049383 | -3.554127 |
| H | -4.902144 | -1.418788 | -3.291260 |
| H | -3.986407 | 0.031604  | -3.704579 |
| H | -3.622980 | -1.496285 | -4.512608 |
| C | -3.688257 | -3.836827 | -2.592101 |
| H | -3.775509 | -4.042187 | -3.666765 |
| H | -3.548572 | -4.792745 | -2.082063 |
| H | -4.657023 | -3.424416 | -2.283168 |
| C | -0.791513 | -4.374853 | -1.345092 |
| C | -1.060044 | -5.552168 | -2.071833 |
| C | 0.112975  | -4.459305 | -0.272647 |
| C | -0.498899 | -6.767491 | -1.698537 |
| H | -1.688391 | -5.505746 | -2.956144 |
| C | 0.670404  | -5.677774 | 0.098814  |
| H | 0.400679  | -3.550613 | 0.252793  |
| C | 0.358174  | -6.841002 | -0.601294 |
| H | -0.721892 | -7.660406 | -2.276897 |
| H | 1.361511  | -5.716794 | 0.937983  |
| H | 0.795614  | -7.792320 | -0.310220 |
| P | -0.642219 | -1.437830 | -1.292809 |

|   |           |           |           |
|---|-----------|-----------|-----------|
| C | -4.548061 | -0.577263 | -0.636440 |
| C | -5.334787 | 0.490944  | -1.088474 |
| C | -5.099016 | -1.471557 | 0.293206  |
| C | -6.626840 | 0.670121  | -0.602706 |
| H | -4.917346 | 1.204225  | -1.795858 |
| C | -6.396783 | -1.299424 | 0.766249  |
| H | -4.496647 | -2.310139 | 0.639843  |
| C | -7.161652 | -0.222239 | 0.325656  |
| H | -7.220130 | 1.512276  | -0.949529 |
| H | -6.807133 | -2.004223 | 1.484407  |
| H | -8.171164 | -0.078774 | 0.701085  |
| C | -2.049378 | -0.139808 | 1.087656  |
| H | -2.507152 | -0.862169 | 1.772816  |
| C | -2.867069 | 1.137429  | 1.150972  |
| C | -3.903489 | 1.293612  | 2.065072  |
| C | -2.585428 | 2.191629  | 0.275036  |
| C | -4.672182 | 2.457077  | 2.080832  |
| H | -4.140633 | 0.479505  | 2.748664  |
| C | -3.341483 | 3.354220  | 0.305161  |
| H | -1.779036 | 2.086877  | -0.452731 |
| C | -4.415420 | 3.507752  | 1.195998  |
| H | -5.493216 | 2.527251  | 2.788958  |
| H | -3.103118 | 4.155783  | -0.391532 |
| N | -0.742921 | 0.241007  | 1.667544  |
| H | -0.309462 | 1.031403  | 1.189583  |
| S | 0.524357  | -0.646490 | 2.312190  |
| O | 1.155013  | -1.658808 | 1.348679  |
| C | -0.349833 | -1.737605 | 3.567487  |
| C | 0.794640  | -2.198283 | 4.468550  |

|    |           |           |           |
|----|-----------|-----------|-----------|
| H  | 0.408654  | -2.893860 | 5.220761  |
| H  | 1.569031  | -2.719787 | 3.896331  |
| H  | 1.262634  | -1.359157 | 4.993606  |
| C  | -0.974873 | -2.943607 | 2.886482  |
| H  | -0.210315 | -3.540003 | 2.382095  |
| H  | -1.449775 | -3.573971 | 3.646355  |
| H  | -1.737499 | -2.685657 | 2.145236  |
| C  | -1.336171 | -0.899211 | 4.363198  |
| H  | -0.876965 | 0.025576  | 4.727668  |
| H  | -2.225921 | -0.625577 | 3.790175  |
| H  | -1.665194 | -1.470429 | 5.238390  |
| C  | -5.248644 | 4.786987  | 1.156161  |
| C  | -5.806004 | 4.988015  | -0.259281 |
| H  | -6.408283 | 5.902418  | -0.306742 |
| H  | -5.010073 | 5.080185  | -1.005031 |
| H  | -6.445364 | 4.149777  | -0.557113 |
| C  | -4.357138 | 5.983114  | 1.515157  |
| H  | -4.933917 | 6.914882  | 1.487505  |
| H  | -3.936222 | 5.879103  | 2.520987  |
| H  | -3.522323 | 6.090263  | 0.814582  |
| C  | -6.422919 | 4.738439  | 2.131055  |
| H  | -7.096665 | 3.902212  | 1.911664  |
| H  | -6.091898 | 4.643169  | 3.170746  |
| H  | -7.006215 | 5.661968  | 2.055633  |
| Cu | 1.375800  | -1.148900 | -0.800242 |
| C  | 3.603940  | 0.768943  | -1.578374 |
| H  | 4.691558  | 0.844482  | -1.752225 |
| N  | 3.144553  | -0.450647 | -1.203673 |
| C  | 4.023078  | -0.874520 | -0.142373 |

|   |           |           |           |
|---|-----------|-----------|-----------|
| C | 3.575010  | -2.246833 | 0.293730  |
| O | 2.808518  | -2.935018 | -0.365795 |
| O | 4.117831  | -2.663174 | 1.440771  |
| C | 3.604806  | -3.913368 | 1.923827  |
| H | 3.918058  | -4.736621 | 1.276880  |
| H | 4.023774  | -4.041766 | 2.921691  |
| H | 2.512927  | -3.870989 | 1.960331  |
| C | 2.840803  | 1.638070  | -2.491700 |
| C | 1.453449  | 1.511084  | -2.626886 |
| C | 3.496734  | 2.666253  | -3.180908 |
| C | 0.739178  | 2.386358  | -3.434627 |
| H | 0.978485  | 0.708012  | -2.067729 |
| C | 2.780642  | 3.549228  | -3.983979 |
| H | 4.575848  | 2.772677  | -3.074216 |
| C | 1.399138  | 3.412230  | -4.113231 |
| H | -0.338817 | 2.275887  | -3.534495 |
| H | 3.300917  | 4.344394  | -4.511572 |
| H | 0.838933  | 4.099514  | -4.742143 |
| C | 3.927212  | 3.880335  | -0.116409 |
| C | 4.698525  | 2.702464  | 0.047973  |
| C | 6.083522  | 2.788715  | -0.090583 |
| C | 6.673564  | 4.026359  | -0.365411 |
| C | 5.891224  | 5.172024  | -0.518368 |
| C | 4.499484  | 5.111915  | -0.397859 |
| C | 2.447243  | 2.196011  | 0.302908  |
| C | 3.775568  | 1.582520  | 0.199830  |
| H | 6.702248  | 1.900510  | 0.016995  |
| H | 7.753689  | 4.095866  | -0.462724 |
| H | 6.366121  | 6.125283  | -0.734993 |

|   |          |           |           |
|---|----------|-----------|-----------|
| H | 3.884992 | 5.999835  | -0.522517 |
| O | 1.360778 | 1.629098  | 0.492574  |
| N | 2.590563 | 3.547873  | 0.042259  |
| C | 3.992050 | 0.277727  | 0.949674  |
| H | 3.051969 | 0.105830  | 1.489404  |
| C | 5.138852 | 0.309673  | 2.000270  |
| H | 5.429861 | 1.362729  | 2.114069  |
| C | 6.404984 | -0.443880 | 1.606013  |
| H | 7.195172 | -0.264026 | 2.343204  |
| H | 6.238125 | -1.524472 | 1.560720  |
| H | 6.795520 | -0.130322 | 0.631396  |
| C | 4.635484 | -0.152306 | 3.364985  |
| H | 5.428347 | -0.104191 | 4.120337  |
| H | 3.807945 | 0.477004  | 3.712694  |
| H | 4.270211 | -1.184369 | 3.325983  |
| H | 5.071618 | -0.975460 | -0.484179 |
| H | 1.811701 | 4.180912  | -0.059232 |

Vibrational frequencies

|           |          |          |
|-----------|----------|----------|
| -179.8990 | 16.2580  | 21.4057  |
| 26.5287   | 31.9192  | 33.8507  |
| 38.6350   | 42.9902  | 45.6186  |
| 48.1114   | 51.0921  | 54.5959  |
| 57.1815   | 60.0938  | 64.9919  |
| 67.2673   | 72.4960  | 77.1995  |
| 87.3236   | 89.2557  | 90.0624  |
| 94.8673   | 95.4051  | 105.2571 |
| 108.7380  | 119.8193 | 123.1030 |
| 124.4592  | 129.1757 | 131.1808 |
| 135.6278  | 138.8082 | 142.3524 |

|          |          |          |
|----------|----------|----------|
| 151.5562 | 155.4898 | 164.1505 |
| 172.1524 | 177.4144 | 184.9657 |
| 187.2672 | 197.8708 | 201.1154 |
| 210.3990 | 215.6404 | 222.1680 |
| 227.3665 | 229.2379 | 233.0687 |
| 239.4481 | 240.3599 | 243.1149 |
| 248.2149 | 251.7930 | 255.8036 |
| 259.7064 | 262.3583 | 266.5040 |
| 268.7320 | 270.0707 | 275.9828 |
| 285.4650 | 294.9586 | 298.9857 |
| 302.3994 | 304.6578 | 314.4652 |
| 317.5098 | 332.7226 | 333.4570 |
| 338.2201 | 340.6735 | 348.5287 |
| 350.0128 | 350.6501 | 355.3700 |
| 366.5590 | 367.9841 | 370.8800 |
| 374.2885 | 376.2261 | 384.5180 |
| 410.6865 | 411.2553 | 412.1323 |
| 417.2367 | 422.1676 | 423.8586 |
| 433.0188 | 433.2526 | 434.6878 |
| 436.9799 | 455.2376 | 460.9491 |
| 470.0086 | 474.3428 | 481.8564 |
| 494.3955 | 502.8123 | 505.4427 |
| 507.7371 | 518.1584 | 520.6657 |
| 532.2795 | 546.2068 | 552.1098 |
| 557.1781 | 562.2593 | 574.9503 |
| 582.7029 | 584.2939 | 586.0804 |
| 602.0340 | 612.2682 | 621.1484 |
| 626.6306 | 629.3561 | 634.1839 |
| 637.3751 | 647.7317 | 652.6089 |

|           |           |           |
|-----------|-----------|-----------|
| 655.3586  | 658.6646  | 669.5135  |
| 687.8780  | 695.6422  | 705.6759  |
| 712.2075  | 715.8502  | 720.3070  |
| 732.6916  | 737.1132  | 749.9896  |
| 750.1403  | 756.1820  | 762.9692  |
| 771.5441  | 773.4746  | 776.9167  |
| 790.2347  | 792.2182  | 803.8534  |
| 805.3459  | 810.7652  | 826.1952  |
| 832.5219  | 856.1100  | 858.2953  |
| 858.9114  | 862.2942  | 864.2298  |
| 866.5990  | 873.1005  | 876.2332  |
| 885.6473  | 891.5657  | 909.4652  |
| 911.6452  | 915.4642  | 917.5669  |
| 919.7727  | 920.3574  | 922.5872  |
| 927.9332  | 939.6938  | 942.8631  |
| 949.3109  | 949.6126  | 952.8612  |
| 956.5918  | 958.1464  | 962.3786  |
| 962.8929  | 965.5405  | 968.8652  |
| 970.2001  | 971.3837  | 972.9044  |
| 974.5596  | 986.2242  | 988.5671  |
| 993.0915  | 995.1791  | 997.5953  |
| 1003.6589 | 1008.7430 | 1016.0946 |
| 1016.9282 | 1021.9684 | 1025.2623 |
| 1025.8739 | 1034.2679 | 1034.5970 |
| 1034.7695 | 1039.2704 | 1039.6803 |
| 1043.3104 | 1050.1663 | 1054.6337 |
| 1057.2150 | 1060.0313 | 1061.5279 |
| 1063.4654 | 1085.2228 | 1103.6381 |
| 1106.0119 | 1106.8409 | 1109.0577 |



|           |           |           |
|-----------|-----------|-----------|
| 1110.8644 | 1111.5401 | 1119.3339 |
| 1130.9799 | 1135.4376 | 1139.2885 |
| 1139.9931 | 1155.5693 | 1162.1557 |
| 1163.7466 | 1169.7582 | 1170.5044 |
| 1170.8824 | 1172.0784 | 1172.8870 |
| 1180.7881 | 1191.0774 | 1192.9782 |
| 1195.1681 | 1199.9751 | 1200.8557 |
| 1202.4737 | 1209.8832 | 1210.9421 |
| 1229.7826 | 1234.8058 | 1235.7181 |
| 1238.6080 | 1241.7651 | 1246.6622 |
| 1252.5581 | 1264.0700 | 1265.5125 |
| 1271.3366 | 1275.2866 | 1292.1315 |
| 1294.7915 | 1298.5944 | 1301.5144 |
| 1311.6867 | 1315.1194 | 1319.9084 |
| 1327.7888 | 1329.1871 | 1332.8842 |
| 1335.5288 | 1344.9912 | 1360.3359 |
| 1366.4114 | 1372.5026 | 1378.1766 |
| 1381.5873 | 1382.6322 | 1383.7239 |
| 1383.9718 | 1388.5036 | 1389.1032 |
| 1390.2624 | 1392.0387 | 1393.7939 |
| 1396.8136 | 1402.3080 | 1402.4973 |
| 1404.9955 | 1405.6558 | 1410.2338 |
| 1411.7298 | 1441.9537 | 1443.8899 |
| 1445.9817 | 1446.0798 | 1454.3914 |
| 1455.4564 | 1456.5343 | 1458.5537 |
| 1462.4390 | 1463.0504 | 1463.3795 |
| 1465.4141 | 1465.7381 | 1471.5390 |
| 1472.5433 | 1474.1732 | 1474.7692 |
| 1475.2404 | 1475.5656 | 1476.4161 |

|           |           |           |
|-----------|-----------|-----------|
| 1477.6301 | 1481.4897 | 1482.5965 |
| 1484.0376 | 1485.1680 | 1489.7599 |
| 1490.4952 | 1494.2189 | 1497.8465 |
| 1499.4703 | 1510.7340 | 1518.1841 |
| 1524.2175 | 1524.4802 | 1529.1169 |
| 1537.9197 | 1547.6563 | 1619.3300 |
| 1628.2531 | 1629.6052 | 1636.7375 |
| 1637.0572 | 1656.2662 | 1662.9272 |
| 1664.6184 | 1673.4760 | 1674.4974 |
| 1675.6624 | 1690.6993 | 1697.4488 |
| 1754.3360 | 2978.2685 | 2982.3503 |
| 3041.3206 | 3043.8239 | 3044.5457 |
| 3047.8774 | 3048.7980 | 3049.8002 |
| 3050.5984 | 3053.0511 | 3055.0092 |
| 3055.0870 | 3055.1547 | 3058.4478 |
| 3063.8177 | 3084.3072 | 3084.8968 |
| 3112.0307 | 3134.2338 | 3137.0718 |
| 3140.4980 | 3142.0106 | 3143.3101 |
| 3143.7193 | 3144.2610 | 3144.5568 |
| 3144.8163 | 3146.8070 | 3149.1339 |
| 3149.4195 | 3149.8952 | 3154.6625 |
| 3156.6678 | 3160.9520 | 3162.5748 |
| 3168.0204 | 3168.3471 | 3168.8053 |
| 3169.7614 | 3171.0620 | 3177.2863 |
| 3179.0236 | 3179.0996 | 3184.6128 |
| 3185.1109 | 3186.1939 | 3186.7774 |
| 3189.4989 | 3193.4970 | 3194.2424 |
| 3196.8009 | 3197.0417 | 3198.1605 |
| 3201.2964 | 3206.2905 | 3206.8964 |

|           |           |           |
|-----------|-----------|-----------|
| 3206.9458 | 3210.7196 | 3212.0523 |
| 3212.8418 | 3216.3449 | 3218.8296 |
| 3221.5833 | 3478.9270 | 3657.6716 |

## M2R

Zero-point correction= 1.100849

Thermal correction to Energy= 1.166098

Thermal correction to Enthalpy= 1.167042

Thermal correction to Gibbs Free Energy= 1.002697

Sum of electronic and zero-point Energies= -5054.847248

Sum of electronic and thermal Energies= -5054.781999

Sum of electronic and thermal Enthalpies= -5054.781055

Sum of electronic and thermal Free Energies= -5054.945400

Cartesian coordinates

|   |           |           |           |
|---|-----------|-----------|-----------|
| C | -1.913661 | -0.744600 | -0.426695 |
| C | -1.256470 | -3.027948 | -0.111240 |
| C | -2.389364 | -2.002152 | -0.408638 |
| C | -0.070167 | -2.443368 | -0.907203 |
| H | 0.871795  | -2.970566 | -0.725870 |
| H | -0.278241 | -2.391138 | -1.982702 |
| C | -0.153282 | -1.657479 | 1.524185  |
| C | -0.812675 | -2.822527 | 1.350412  |
| C | -1.601643 | -4.459837 | -0.474848 |
| H | -2.449077 | -4.842889 | 0.103734  |
| H | -1.868499 | -4.537197 | -1.533971 |
| H | -0.747355 | -5.120321 | -0.296364 |
| C | -1.203472 | -3.810337 | 2.391751  |
| H | -0.642193 | -4.748708 | 2.295510  |
| H | -1.038049 | -3.427369 | 3.402003  |

|   |           |           |           |
|---|-----------|-----------|-----------|
| H | -2.262448 | -4.082312 | 2.295829  |
| C | 0.392710  | -1.075177 | 2.744932  |
| C | 0.258616  | 0.302438  | 2.981327  |
| C | 1.082630  | -1.846431 | 3.695442  |
| C | 0.771398  | 0.883956  | 4.135185  |
| H | -0.257475 | 0.918223  | 2.247330  |
| C | 1.594771  | -1.263729 | 4.850277  |
| H | 1.242706  | -2.904781 | 3.503907  |
| C | 1.440339  | 0.103612  | 5.077286  |
| H | 0.653549  | 1.953400  | 4.295214  |
| H | 2.132534  | -1.876947 | 5.569194  |
| H | 1.851870  | 0.559535  | 5.974144  |
| P | -0.088688 | -0.783467 | -0.110856 |
| C | -3.781749 | -2.456673 | -0.593659 |
| C | -4.319128 | -2.619529 | -1.876374 |
| C | -4.583502 | -2.753647 | 0.515836  |
| C | -5.635628 | -3.041534 | -2.045730 |
| H | -3.700218 | -2.396911 | -2.744018 |
| C | -5.899012 | -3.173385 | 0.345520  |
| H | -4.175858 | -2.623235 | 1.516501  |
| C | -6.431410 | -3.313881 | -0.935389 |
| H | -6.041476 | -3.152049 | -3.047885 |
| H | -6.511668 | -3.385840 | 1.217862  |
| H | -7.461718 | -3.635609 | -1.065554 |
| C | -2.583634 | 0.582095  | -0.652018 |
| H | -2.031980 | 1.301941  | -0.026752 |
| C | -4.042244 | 0.621564  | -0.255468 |
| C | -4.380231 | 0.636410  | 1.102286  |
| C | -5.074143 | 0.584995  | -1.188647 |

|   |           |           |           |
|---|-----------|-----------|-----------|
| C | -5.708630 | 0.596312  | 1.503541  |
| H | -3.586543 | 0.663284  | 1.849711  |
| C | -6.406673 | 0.536493  | -0.782292 |
| H | -4.831801 | 0.574902  | -2.248625 |
| C | -6.755845 | 0.534973  | 0.570529  |
| H | -5.937677 | 0.605593  | 2.567720  |
| H | -7.178410 | 0.488243  | -1.545573 |
| N | -2.371475 | 1.001895  | -2.064047 |
| H | -2.143961 | 0.206244  | -2.654543 |
| S | -1.284587 | 2.255421  | -2.451255 |
| O | -0.156848 | 2.345241  | -1.427665 |
| C | -2.327073 | 3.769886  | -2.068318 |
| C | -1.450639 | 4.923602  | -2.543608 |
| H | -1.983105 | 5.868060  | -2.392699 |
| H | -0.512815 | 4.969879  | -1.982730 |
| H | -1.210673 | 4.844421  | -3.609490 |
| C | -2.585507 | 3.873219  | -0.576663 |
| H | -1.664396 | 3.712296  | -0.005408 |
| H | -2.951929 | 4.879591  | -0.345768 |
| H | -3.345633 | 3.162647  | -0.238518 |
| C | -3.604315 | 3.673130  | -2.881386 |
| H | -4.158181 | 4.614075  | -2.793723 |
| H | -3.400467 | 3.510074  | -3.945853 |
| H | -4.247999 | 2.863764  | -2.524989 |
| C | -8.202741 | 0.460384  | 1.055935  |
| C | -8.396876 | -0.820088 | 1.878704  |
| H | -9.413088 | -0.861702 | 2.287908  |
| H | -8.247636 | -1.711732 | 1.259933  |
| H | -7.696997 | -0.878211 | 2.719332  |

|    |            |           |           |
|----|------------|-----------|-----------|
| C  | -9.196728  | 0.437249  | -0.102714 |
| H  | -10.219419 | 0.379477  | 0.284415  |
| H  | -9.128813  | 1.338974  | -0.720883 |
| H  | -9.041294  | -0.431342 | -0.752309 |
| C  | -8.509806  | 1.675482  | 1.940634  |
| H  | -7.859491  | 1.715082  | 2.820423  |
| H  | -8.381175  | 2.613081  | 1.388630  |
| H  | -9.545139  | 1.636653  | 2.298512  |
| Cu | 1.135816   | 0.831094  | -0.606508 |
| C  | 4.073093   | 0.576705  | -1.332291 |
| H  | 4.968004   | 1.184256  | -1.587561 |
| N  | 2.972495   | 1.396385  | -1.000027 |
| C  | 3.488295   | 2.086769  | 0.166841  |
| C  | 2.380257   | 2.909105  | 0.756916  |
| O  | 1.262447   | 2.455235  | 0.968272  |
| O  | 2.707556   | 4.181888  | 0.996050  |
| C  | 1.672955   | 4.975907  | 1.595914  |
| H  | 1.388300   | 4.562465  | 2.567264  |
| H  | 2.095401   | 5.971880  | 1.719216  |
| H  | 0.791844   | 5.013864  | 0.950956  |
| C  | 3.904719   | -0.447362 | -2.411718 |
| C  | 4.998332   | -0.820613 | -3.200533 |
| C  | 2.688199   | -1.105327 | -2.595652 |
| C  | 4.873157   | -1.827400 | -4.155010 |
| H  | 5.953538   | -0.314464 | -3.060132 |
| C  | 2.555303   | -2.103347 | -3.554727 |
| H  | 1.868142   | -0.796810 | -1.949561 |
| C  | 3.649939   | -2.470933 | -4.336755 |
| H  | 5.730483   | -2.106236 | -4.762414 |

|   |          |           |           |
|---|----------|-----------|-----------|
| H | 1.598695 | -2.604167 | -3.688699 |
| H | 3.550254 | -3.253221 | -5.084926 |
| C | 6.267029 | -1.720370 | -0.088570 |
| C | 6.049177 | -0.334089 | 0.019026  |
| C | 7.122836 | 0.532636  | -0.140970 |
| C | 8.401617 | 0.009218  | -0.367992 |
| C | 8.594988 | -1.368439 | -0.458493 |
| C | 7.524645 | -2.257796 | -0.324966 |
| C | 4.010893 | -1.482096 | 0.269018  |
| C | 4.583579 | -0.085387 | 0.114823  |
| H | 6.971245 | 1.609379  | -0.092031 |
| H | 9.247444 | 0.681927  | -0.479158 |
| H | 9.591514 | -1.762154 | -0.640073 |
| H | 7.670436 | -3.331219 | -0.407846 |
| H | 4.924171 | -3.373823 | 0.067915  |
| O | 2.854940 | -1.812324 | 0.505838  |
| N | 5.049626 | -2.372631 | 0.060478  |
| C | 3.987180 | 0.932148  | 1.107389  |
| H | 3.059156 | 0.473786  | 1.492591  |
| C | 4.871650 | 1.274288  | 2.308500  |
| H | 5.845404 | 1.629834  | 1.938572  |
| C | 5.109110 | 0.025505  | 3.151700  |
| H | 5.722375 | 0.248773  | 4.031874  |
| H | 4.154202 | -0.384268 | 3.507955  |
| H | 5.618881 | -0.764208 | 2.589239  |
| C | 4.265935 | 2.374393  | 3.172879  |
| H | 4.846839 | 2.509223  | 4.091810  |
| H | 4.238518 | 3.339002  | 2.659460  |
| H | 3.240177 | 2.118662  | 3.472200  |

|   |          |          |           |
|---|----------|----------|-----------|
| H | 4.348574 | 2.748663 | -0.062717 |
|---|----------|----------|-----------|

Vibrational frequencies

|          |          |          |
|----------|----------|----------|
| 15.3281  | 21.8822  | 25.6795  |
| 30.8363  | 35.6390  | 37.8712  |
| 42.6433  | 43.8741  | 47.4543  |
| 50.4551  | 54.2110  | 57.4482  |
| 63.3992  | 68.8128  | 71.3230  |
| 71.9098  | 75.0692  | 79.2970  |
| 85.4469  | 86.2547  | 93.1340  |
| 96.1873  | 101.5343 | 105.0167 |
| 108.1191 | 110.6283 | 114.0491 |
| 116.9598 | 123.2982 | 126.1253 |
| 131.7028 | 132.7038 | 135.6130 |
| 144.8849 | 156.8979 | 159.0142 |
| 170.8759 | 175.8821 | 184.9527 |
| 190.6006 | 195.2948 | 196.2500 |
| 206.6928 | 218.3836 | 219.3103 |
| 221.2608 | 226.3409 | 228.2200 |
| 233.1587 | 240.1606 | 245.5987 |
| 248.0580 | 254.8168 | 257.8546 |
| 258.7104 | 263.4197 | 267.1616 |
| 272.6674 | 277.2290 | 281.3296 |
| 285.1228 | 289.5640 | 297.7459 |
| 315.5716 | 315.7798 | 319.7358 |
| 324.4099 | 326.0337 | 327.4168 |
| 331.9605 | 339.7029 | 341.8343 |
| 345.8551 | 346.9355 | 354.8647 |
| 360.0890 | 365.6855 | 371.2072 |
| 375.4065 | 384.9255 | 389.3510 |



|          |          |          |
|----------|----------|----------|
| 406.6397 | 411.2276 | 417.9423 |
| 420.2957 | 423.3124 | 424.4660 |
| 425.3838 | 428.3829 | 430.8318 |
| 448.6518 | 451.5635 | 462.1622 |
| 470.8382 | 472.3341 | 475.3905 |
| 486.5520 | 497.7358 | 502.7369 |
| 507.1259 | 513.8077 | 532.0357 |
| 542.5621 | 550.7130 | 556.3149 |
| 557.3128 | 566.8540 | 576.9427 |
| 585.4518 | 589.2559 | 597.8801 |
| 614.6540 | 616.7285 | 622.9456 |
| 627.5676 | 628.7621 | 629.1412 |
| 637.3342 | 642.0916 | 647.5169 |
| 654.0152 | 660.7927 | 677.7794 |
| 685.1109 | 701.0172 | 706.9850 |
| 707.2895 | 720.0911 | 722.6678 |
| 727.2901 | 730.6136 | 749.2536 |
| 749.5405 | 762.3924 | 763.8004 |
| 763.9726 | 771.7528 | 773.9846 |
| 798.4916 | 806.5894 | 807.3215 |
| 818.4285 | 820.2481 | 834.7320 |
| 835.2244 | 843.4943 | 848.4401 |
| 854.5971 | 857.2813 | 864.5004 |
| 869.3292 | 872.2054 | 884.6121 |
| 888.8368 | 898.2245 | 900.0461 |
| 903.8532 | 906.1546 | 910.2024 |
| 919.5928 | 922.3524 | 932.7802 |
| 936.2373 | 941.5574 | 942.2367 |
| 946.2567 | 950.2854 | 951.9810 |

|           |           |           |
|-----------|-----------|-----------|
| 953.0659  | 953.8475  | 959.5690  |
| 960.3546  | 960.8999  | 965.7307  |
| 965.7566  | 972.1575  | 975.6927  |
| 978.0864  | 980.7424  | 986.1138  |
| 992.0622  | 992.4522  | 1001.0677 |
| 1010.4068 | 1014.7854 | 1017.0817 |
| 1019.0202 | 1023.8558 | 1029.7731 |
| 1030.1719 | 1031.2975 | 1033.1271 |
| 1037.0297 | 1037.7387 | 1040.6969 |
| 1041.4359 | 1043.0658 | 1047.1395 |
| 1049.5708 | 1054.6615 | 1055.3979 |
| 1057.3002 | 1062.7073 | 1080.8692 |
| 1088.5157 | 1094.9220 | 1100.1755 |
| 1101.3742 | 1102.2768 | 1115.9884 |
| 1126.5131 | 1134.9104 | 1140.8961 |
| 1154.0467 | 1157.2411 | 1161.1540 |
| 1163.2894 | 1164.4810 | 1165.2365 |
| 1168.8338 | 1169.2016 | 1173.7635 |
| 1175.6012 | 1186.0617 | 1186.7060 |
| 1188.1082 | 1194.4462 | 1195.1617 |
| 1200.4241 | 1204.9602 | 1206.7706 |
| 1208.5818 | 1231.3083 | 1232.9858 |
| 1234.1287 | 1241.9836 | 1247.8747 |
| 1258.1414 | 1259.8700 | 1265.1982 |
| 1266.5160 | 1273.7860 | 1278.7942 |
| 1295.1349 | 1298.9436 | 1304.5937 |
| 1308.9880 | 1313.4078 | 1320.6092 |
| 1321.1486 | 1329.3612 | 1331.3838 |
| 1333.2956 | 1337.9903 | 1346.9354 |

|           |           |           |
|-----------|-----------|-----------|
| 1347.5745 | 1355.7605 | 1369.9209 |
| 1378.1523 | 1378.8706 | 1379.4226 |
| 1380.8229 | 1383.4554 | 1384.8364 |
| 1386.0224 | 1388.1970 | 1388.4377 |
| 1393.6049 | 1394.7430 | 1399.5572 |
| 1400.2966 | 1401.7607 | 1406.7163 |
| 1407.3277 | 1418.3505 | 1435.1557 |
| 1442.8692 | 1445.5007 | 1451.1255 |
| 1451.9155 | 1453.7882 | 1455.9401 |
| 1457.0706 | 1461.2002 | 1462.0540 |
| 1464.3994 | 1464.8804 | 1469.7209 |
| 1470.2150 | 1471.8646 | 1472.2329 |
| 1472.3850 | 1473.4330 | 1474.5513 |
| 1477.4253 | 1480.1848 | 1480.4214 |
| 1481.0826 | 1482.9927 | 1483.7765 |
| 1488.4896 | 1493.9710 | 1494.2565 |
| 1495.4021 | 1508.4302 | 1508.8209 |
| 1515.5662 | 1523.2522 | 1527.2616 |
| 1533.6687 | 1551.5578 | 1622.0891 |
| 1624.2749 | 1632.2571 | 1642.5435 |
| 1645.0867 | 1653.9060 | 1655.2608 |
| 1669.0984 | 1671.7794 | 1675.9744 |
| 1684.3068 | 1707.7145 | 1772.8346 |
| 1794.1464 | 2867.1100 | 2914.3228 |
| 3007.1455 | 3029.5373 | 3037.8984 |
| 3039.1297 | 3043.0941 | 3045.4581 |
| 3046.9096 | 3048.5224 | 3053.5818 |
| 3054.4395 | 3060.0153 | 3062.6725 |
| 3063.1601 | 3073.1792 | 3074.3140 |

|           |           |           |
|-----------|-----------|-----------|
| 3114.3243 | 3118.1697 | 3131.6916 |
| 3134.9274 | 3138.8986 | 3140.6147 |
| 3144.2307 | 3144.7739 | 3147.1980 |
| 3150.5962 | 3153.2564 | 3154.0083 |
| 3154.4287 | 3155.5539 | 3157.0296 |
| 3157.8740 | 3160.4129 | 3161.5531 |
| 3166.2381 | 3169.0621 | 3169.7609 |
| 3171.1295 | 3174.2893 | 3174.6484 |
| 3175.4447 | 3176.8091 | 3177.1099 |
| 3179.2977 | 3183.8412 | 3185.4668 |
| 3187.8668 | 3192.2791 | 3192.3138 |
| 3193.2110 | 3194.6710 | 3196.2964 |
| 3200.4420 | 3201.5629 | 3201.8482 |
| 3202.8015 | 3208.5433 | 3208.8762 |
| 3216.4483 | 3217.9042 | 3218.6016 |
| 3225.2573 | 3557.8027 | 3650.3348 |

## M2S

Zero-point correction= 1.102230

Thermal correction to Energy= 1.167208

Thermal correction to Enthalpy= 1.168152

Thermal correction to Gibbs Free Energy= 1.005614

Sum of electronic and zero-point Energies= -5054.839535

Sum of electronic and thermal Energies= -5054.774557

Sum of electronic and thermal Enthalpies= -5054.773612

Sum of electronic and thermal Free Energies= -5054.936151

Cartesian coordinates

|   |          |          |           |
|---|----------|----------|-----------|
| C | 2.084249 | 0.699143 | -0.331617 |
| C | 2.950353 | 1.487220 | -2.444294 |

|   |           |           |           |
|---|-----------|-----------|-----------|
| C | 3.200608  | 0.786459  | -1.086944 |
| C | 1.532959  | 1.012287  | -2.805640 |
| H | 1.129021  | 1.511930  | -3.691806 |
| H | 1.479990  | -0.074214 | -2.933661 |
| C | 1.563718  | 3.217519  | -1.519943 |
| C | 2.754183  | 2.977283  | -2.116586 |
| C | 3.980009  | 1.214336  | -3.524833 |
| H | 4.991951  | 1.508022  | -3.229463 |
| H | 4.006523  | 0.150480  | -3.778254 |
| H | 3.724615  | 1.764010  | -4.436517 |
| C | 3.885426  | 3.919089  | -2.337601 |
| H | 3.987573  | 4.211012  | -3.390707 |
| H | 3.783164  | 4.834281  | -1.749662 |
| H | 4.833917  | 3.440330  | -2.063605 |
| C | 1.003846  | 4.488877  | -1.074363 |
| C | 1.317539  | 5.704076  | -1.715001 |
| C | 0.097442  | 4.528054  | -0.000640 |
| C | 0.798058  | 6.909274  | -1.256797 |
| H | 1.948659  | 5.697152  | -2.598769 |
| C | -0.418099 | 5.736335  | 0.455098  |
| H | -0.227556 | 3.594115  | 0.454499  |
| C | -0.061378 | 6.934785  | -0.159218 |
| H | 1.053902  | 7.832694  | -1.770401 |
| H | -1.111374 | 5.740078  | 1.293278  |
| H | -0.466769 | 7.877706  | 0.197520  |
| P | 0.718393  | 1.570172  | -1.254382 |
| C | 4.572653  | 0.422053  | -0.677164 |
| C | 5.258759  | -0.648168 | -1.268352 |
| C | 5.217486  | 1.161831  | 0.323882  |

|   |           |           |           |
|---|-----------|-----------|-----------|
| C | 6.544130  | -0.980270 | -0.853664 |
| H | 4.765915  | -1.241421 | -2.035463 |
| C | 6.508744  | 0.834980  | 0.730130  |
| H | 4.693652  | 1.999323  | 0.782838  |
| C | 7.173536  | -0.241245 | 0.146629  |
| H | 7.058147  | -1.818741 | -1.316282 |
| H | 6.993245  | 1.418641  | 1.508492  |
| H | 8.178461  | -0.502441 | 0.467250  |
| C | 2.012425  | 0.052985  | 1.040304  |
| H | 2.440725  | 0.738940  | 1.780355  |
| C | 2.814496  | -1.233430 | 1.090925  |
| C | 3.825630  | -1.418803 | 2.028244  |
| C | 2.550139  | -2.265617 | 0.184819  |
| C | 4.587022  | -2.586644 | 2.037817  |
| H | 4.048928  | -0.622062 | 2.736666  |
| C | 3.297792  | -3.434258 | 0.208487  |
| H | 1.762161  | -2.140455 | -0.559063 |
| C | 4.346805  | -3.615379 | 1.123293  |
| H | 5.387808  | -2.678662 | 2.766195  |
| H | 3.072325  | -4.218538 | -0.511609 |
| N | 0.669584  | -0.323015 | 1.536459  |
| H | 0.223757  | -1.072705 | 1.008473  |
| S | -0.565834 | 0.557796  | 2.243247  |
| O | -1.107563 | 1.699681  | 1.377964  |
| C | 0.298045  | 1.456156  | 3.646064  |
| C | -0.871196 | 1.850384  | 4.549234  |
| H | -0.497045 | 2.435259  | 5.395608  |
| H | -1.604207 | 2.463989  | 4.013999  |
| H | -1.388291 | 0.971858  | 4.949868  |

|    |           |           |           |
|----|-----------|-----------|-----------|
| C  | 0.993346  | 2.707678  | 3.136358  |
| H  | 0.278474  | 3.379784  | 2.655022  |
| H  | 1.437700  | 3.238702  | 3.985462  |
| H  | 1.792690  | 2.502838  | 2.417652  |
| C  | 1.219327  | 0.491856  | 4.371949  |
| H  | 0.701768  | -0.435228 | 4.639457  |
| H  | 2.103246  | 0.223287  | 3.787458  |
| H  | 1.561803  | 0.956977  | 5.303141  |
| C  | 5.167239  | -4.903045 | 1.086233  |
| C  | 5.752581  | -5.098059 | -0.318215 |
| H  | 6.333930  | -6.026038 | -0.364147 |
| H  | 4.973579  | -5.159840 | -1.084668 |
| H  | 6.419744  | -4.271845 | -0.586595 |
| C  | 4.254799  | -6.091711 | 1.416496  |
| H  | 4.822238  | -7.029470 | 1.396540  |
| H  | 3.811709  | -5.988934 | 2.412932  |
| H  | 3.435135  | -6.185355 | 0.696282  |
| C  | 6.322071  | -4.876929 | 2.084884  |
| H  | 7.005493  | -4.042166 | 1.890997  |
| H  | 5.971749  | -4.794612 | 3.119340  |
| H  | 6.900718  | -5.803242 | 2.007371  |
| Cu | -1.314547 | 1.305980  | -0.843111 |
| C  | -3.550986 | -0.669411 | -1.548712 |
| H  | -4.596602 | -0.632743 | -1.921560 |
| N  | -3.063607 | 0.619254  | -1.265848 |
| C  | -3.928150 | 1.038742  | -0.188115 |
| C  | -3.487604 | 2.399617  | 0.282474  |
| O  | -2.660459 | 3.077608  | -0.313061 |
| O  | -4.115546 | 2.823286  | 1.384458  |

|   |           |           |           |
|---|-----------|-----------|-----------|
| C | -3.630983 | 4.071267  | 1.902586  |
| H | -3.862358 | 4.892689  | 1.219834  |
| H | -4.141514 | 4.217222  | 2.854063  |
| H | -2.548911 | 4.016667  | 2.048247  |
| C | -2.765263 | -1.536042 | -2.484681 |
| C | -1.386178 | -1.381549 | -2.638176 |
| C | -3.410660 | -2.555606 | -3.194645 |
| C | -0.666207 | -2.221288 | -3.481915 |
| H | -0.918836 | -0.572739 | -2.078331 |
| C | -2.691366 | -3.405189 | -4.031056 |
| H | -4.489027 | -2.675377 | -3.091911 |
| C | -1.314752 | -3.240244 | -4.178131 |
| H | 0.406964  | -2.083053 | -3.598389 |
| H | -3.207147 | -4.191639 | -4.576184 |
| H | -0.752307 | -3.897467 | -4.836561 |
| C | -4.459681 | -3.658594 | -0.089865 |
| C | -4.959346 | -2.346979 | -0.190727 |
| C | -6.281451 | -2.165762 | -0.581509 |
| C | -7.096604 | -3.281552 | -0.799701 |
| C | -6.585022 | -4.571356 | -0.658704 |
| C | -5.248132 | -4.779038 | -0.310058 |
| C | -2.658847 | -2.296021 | 0.285183  |
| C | -3.823906 | -1.390623 | -0.053989 |
| H | -6.680391 | -1.163042 | -0.718681 |
| H | -8.134566 | -3.141235 | -1.088480 |
| H | -7.227644 | -5.429566 | -0.835620 |
| H | -4.835347 | -5.780424 | -0.226428 |
| O | -1.503711 | -1.970737 | 0.554579  |
| N | -3.102271 | -3.597042 | 0.207032  |



|   |           |           |           |
|---|-----------|-----------|-----------|
| C | -3.837032 | -0.130570 | 0.842392  |
| H | -2.800257 | -0.070813 | 1.188645  |
| C | -4.693372 | -0.095904 | 2.114524  |
| H | -4.310886 | 0.769500  | 2.675500  |
| C | -4.437322 | -1.330898 | 2.971950  |
| H | -4.937636 | -1.250745 | 3.943749  |
| H | -4.813843 | -2.239971 | 2.486577  |
| H | -3.366533 | -1.475207 | 3.160959  |
| C | -6.187198 | 0.132879  | 1.919352  |
| H | -6.661017 | 0.372357  | 2.878006  |
| H | -6.394840 | 0.965697  | 1.238820  |
| H | -6.692669 | -0.755166 | 1.528582  |
| H | -4.991829 | 1.142009  | -0.502243 |
| H | -2.498469 | -4.396102 | 0.333662  |

Vibrational frequencies

|          |          |          |
|----------|----------|----------|
| 22.2684  | 23.5999  | 26.5019  |
| 32.3648  | 38.4251  | 41.4108  |
| 45.8837  | 51.1769  | 55.7206  |
| 57.8733  | 60.6068  | 62.9745  |
| 68.3880  | 72.5052  | 76.3312  |
| 80.6874  | 84.4871  | 84.6742  |
| 92.0366  | 94.0432  | 97.4277  |
| 99.8325  | 103.7694 | 109.2644 |
| 111.8902 | 116.2997 | 121.8698 |
| 125.3609 | 129.2932 | 131.7751 |
| 137.3901 | 141.5886 | 146.5599 |
| 149.8888 | 168.7728 | 171.3268 |
| 177.3940 | 185.7516 | 194.1160 |
| 200.5072 | 206.2337 | 215.0874 |

|          |          |          |
|----------|----------|----------|
| 222.3536 | 224.5590 | 228.6242 |
| 229.6502 | 231.6117 | 239.8216 |
| 242.1496 | 244.6712 | 246.8057 |
| 249.4874 | 259.0991 | 263.7960 |
| 267.5576 | 269.0954 | 271.1965 |
| 275.8222 | 279.1561 | 279.9574 |
| 286.0185 | 287.1589 | 291.4928 |
| 303.8977 | 310.2162 | 314.4427 |
| 323.5883 | 329.8569 | 331.3382 |
| 334.8119 | 344.6491 | 346.9818 |
| 352.0765 | 357.3731 | 363.3956 |
| 368.8147 | 369.6878 | 375.2272 |
| 381.4574 | 385.4145 | 390.3601 |
| 399.9035 | 411.0144 | 415.9058 |
| 418.4024 | 426.9940 | 428.2640 |
| 439.8140 | 445.1847 | 446.5827 |
| 452.8820 | 455.4258 | 462.0980 |
| 467.0628 | 468.7000 | 472.5152 |
| 482.7657 | 490.8165 | 505.9658 |
| 508.2875 | 514.6302 | 537.3946 |
| 537.8652 | 547.7373 | 555.2784 |
| 566.8695 | 572.3697 | 576.5281 |
| 579.6200 | 586.5334 | 590.7196 |
| 613.7072 | 620.0474 | 624.8723 |
| 629.3837 | 629.9876 | 635.5821 |
| 638.0861 | 639.4186 | 648.7435 |
| 653.5156 | 657.8868 | 676.0277 |
| 684.1898 | 693.2997 | 694.8566 |
| 714.0251 | 721.2074 | 726.1447 |

|           |           |           |
|-----------|-----------|-----------|
| 729.0331  | 731.2116  | 735.2120  |
| 751.0770  | 752.5359  | 765.0774  |
| 770.0713  | 772.0707  | 776.4015  |
| 796.0114  | 803.9454  | 806.9740  |
| 814.0158  | 822.4677  | 833.1002  |
| 834.7601  | 846.8854  | 854.6696  |
| 858.1100  | 860.1921  | 864.8669  |
| 872.8363  | 875.3510  | 880.1108  |
| 888.6007  | 896.2273  | 898.6707  |
| 904.0167  | 912.3022  | 917.2923  |
| 918.5627  | 924.0330  | 928.4218  |
| 938.9206  | 941.3019  | 944.0641  |
| 944.5782  | 948.0984  | 950.1560  |
| 950.7225  | 950.9129  | 959.8259  |
| 961.9804  | 965.4269  | 969.4589  |
| 969.8402  | 970.5036  | 975.9114  |
| 986.2094  | 987.9985  | 989.5717  |
| 991.2371  | 993.3826  | 1001.6794 |
| 1014.7221 | 1016.1394 | 1018.1679 |
| 1020.9636 | 1024.0665 | 1028.5053 |
| 1032.4767 | 1035.0133 | 1036.9933 |
| 1041.6819 | 1043.1866 | 1045.3199 |
| 1047.8774 | 1051.8694 | 1052.4804 |
| 1056.3564 | 1058.7598 | 1062.3879 |
| 1065.5474 | 1069.0053 | 1086.3197 |
| 1102.3664 | 1103.7047 | 1111.1586 |
| 1119.2758 | 1120.0754 | 1122.5133 |
| 1129.7769 | 1134.9948 | 1137.1125 |
| 1149.2591 | 1156.6130 | 1165.4541 |

|           |           |           |
|-----------|-----------|-----------|
| 1168.0030 | 1168.6585 | 1169.2962 |
| 1175.6523 | 1175.7645 | 1184.3458 |
| 1187.3052 | 1190.7711 | 1193.3058 |
| 1197.9078 | 1202.9937 | 1206.4390 |
| 1208.9152 | 1212.6539 | 1213.0169 |
| 1215.6136 | 1216.2299 | 1234.5257 |
| 1236.0199 | 1236.2250 | 1240.8552 |
| 1253.6843 | 1258.2008 | 1262.5583 |
| 1267.7320 | 1269.7402 | 1273.3683 |
| 1289.2189 | 1299.6202 | 1300.3280 |
| 1311.0687 | 1311.3698 | 1319.5998 |
| 1324.5168 | 1328.9909 | 1330.2704 |
| 1332.4963 | 1335.9026 | 1347.5800 |
| 1354.9317 | 1365.7881 | 1367.9036 |
| 1376.5004 | 1378.3482 | 1379.7881 |
| 1384.5088 | 1385.4925 | 1388.0344 |
| 1390.0962 | 1390.7060 | 1391.0358 |
| 1391.6045 | 1394.2754 | 1394.7148 |
| 1402.6834 | 1406.5704 | 1413.4033 |
| 1413.7696 | 1415.8247 | 1436.8473 |
| 1444.4851 | 1452.6077 | 1453.5159 |
| 1455.6478 | 1458.0274 | 1460.9498 |
| 1461.0709 | 1462.3651 | 1465.7704 |
| 1465.9020 | 1467.1831 | 1468.3112 |
| 1469.5281 | 1471.6789 | 1473.7088 |
| 1475.4430 | 1478.1979 | 1479.3471 |
| 1482.8180 | 1482.9377 | 1484.6308 |
| 1485.5610 | 1486.2639 | 1486.7022 |
| 1487.6708 | 1490.0424 | 1494.9329 |

|           |           |           |
|-----------|-----------|-----------|
| 1495.5282 | 1507.4783 | 1511.1272 |
| 1518.7263 | 1524.6782 | 1532.7532 |
| 1534.0481 | 1546.1564 | 1623.6285 |
| 1625.3848 | 1628.1644 | 1640.7385 |
| 1642.1280 | 1647.1120 | 1656.4580 |
| 1660.2169 | 1666.0313 | 1671.0232 |
| 1673.4557 | 1674.2856 | 1768.7630 |
| 1780.9809 | 2875.4321 | 2892.1850 |
| 3037.9745 | 3043.4995 | 3045.8320 |
| 3047.1642 | 3052.3582 | 3055.4954 |
| 3056.5813 | 3060.5298 | 3060.6301 |
| 3063.4049 | 3063.9725 | 3067.9120 |
| 3082.1151 | 3086.4166 | 3095.8476 |
| 3119.9890 | 3126.3656 | 3136.6635 |
| 3137.2736 | 3141.8131 | 3142.8533 |
| 3144.2599 | 3147.0763 | 3148.5533 |
| 3149.7226 | 3152.6207 | 3153.0124 |
| 3156.5766 | 3158.0160 | 3161.1720 |
| 3162.1445 | 3162.7962 | 3165.1618 |
| 3165.7387 | 3166.1186 | 3167.1533 |
| 3169.8290 | 3172.8174 | 3174.9403 |
| 3177.2578 | 3180.5086 | 3182.9947 |
| 3183.6558 | 3184.9253 | 3185.3513 |
| 3187.8500 | 3189.8504 | 3192.1875 |
| 3192.3679 | 3193.4780 | 3196.4053 |
| 3201.5941 | 3202.2774 | 3209.0277 |
| 3209.0848 | 3212.6752 | 3212.8647 |
| 3215.0154 | 3216.0151 | 3218.6780 |
| 3225.0281 | 3544.2947 | 3648.3698 |

**NEt<sub>3</sub>•H<sup>+</sup>**

Zero-point correction= 0.222507

Thermal correction to Energy= 0.231637

Thermal correction to Enthalpy= 0.232581

Thermal correction to Gibbs Free Energy= 0.189262

Sum of electronic and zero-point Energies= -292.630801

Sum of electronic and thermal Energies= -292.621671

Sum of electronic and thermal Enthalpies= -292.620727

Sum of electronic and thermal Free Energies= -292.664046

## Cartesian coordinates

|   |           |           |           |
|---|-----------|-----------|-----------|
| N | 0.060166  | -0.186572 | 0.677381  |
| C | -1.414547 | -0.559884 | 0.699515  |
| H | -1.475672 | -1.456943 | 1.319334  |
| H | -1.915282 | 0.250328  | 1.233376  |
| C | 0.312138  | 1.305172  | 0.633036  |
| H | -0.222959 | 1.710682  | 1.494890  |
| H | 1.380185  | 1.433646  | 0.819717  |
| C | 0.839890  | -0.982344 | -0.339216 |
| H | 0.567798  | -2.025350 | -0.157697 |
| H | 0.461248  | -0.703586 | -1.324154 |
| C | -2.033956 | -0.811259 | -0.652319 |
| H | -3.102417 | -0.981184 | -0.500458 |
| H | -1.930833 | 0.029528  | -1.340658 |
| H | -1.630417 | -1.705433 | -1.132209 |
| C | -0.112518 | 1.972455  | -0.647597 |
| H | -1.196989 | 1.979044  | -0.775678 |
| H | 0.215741  | 3.013588  | -0.614305 |
| H | 0.344514  | 1.517302  | -1.530611 |

|   |          |           |           |
|---|----------|-----------|-----------|
| C | 2.326921 | -0.770492 | -0.225949 |
| H | 2.830950 | -1.495772 | -0.868108 |
| H | 2.637222 | 0.224475  | -0.554167 |
| H | 2.686121 | -0.930965 | 0.795274  |
| H | 0.422060 | -0.475240 | 1.588971  |

Vibrational frequencies

|           |           |           |
|-----------|-----------|-----------|
| 70.6953   | 108.6034  | 140.9538  |
| 234.3508  | 246.4202  | 270.8266  |
| 294.7613  | 317.7945  | 387.3084  |
| 406.5656  | 466.8093  | 596.7278  |
| 721.5898  | 786.8123  | 804.8426  |
| 827.1906  | 889.1158  | 898.5910  |
| 1024.8115 | 1040.7649 | 1058.4452 |
| 1075.1619 | 1083.3735 | 1114.1247 |
| 1169.6652 | 1194.4967 | 1202.7150 |
| 1294.9524 | 1322.0651 | 1333.2344 |
| 1354.8583 | 1377.9330 | 1396.6555 |
| 1399.4524 | 1412.8404 | 1419.6810 |
| 1439.4908 | 1450.9268 | 1460.3531 |
| 1462.7944 | 1467.0919 | 1471.8625 |
| 1475.5269 | 1481.9872 | 1490.9222 |
| 1496.3781 | 1513.6432 | 3075.5939 |
| 3081.5818 | 3090.4426 | 3096.3452 |
| 3116.5954 | 3125.7995 | 3159.9168 |
| 3165.5503 | 3174.6729 | 3179.1002 |
| 3182.7810 | 3188.0374 | 3194.9191 |
| 3197.5417 | 3201.1989 | 3483.0150 |

**Cat+NEt<sub>3</sub>**

Zero-point correction= 0.898993  
 Thermal correction to Energy= 0.949075  
 Thermal correction to Enthalpy= 0.950019  
 Thermal correction to Gibbs Free Energy= 0.818031  
 Sum of electronic and zero-point Energies= -4159.991771  
 Sum of electronic and thermal Energies= -4159.941689  
 Sum of electronic and thermal Enthalpies= -4159.940744  
 Sum of electronic and thermal Free Energies= -4160.072733

Cartesian coordinates

|   |           |           |           |
|---|-----------|-----------|-----------|
| C | -0.461368 | -0.646679 | -0.770124 |
| C | -0.247351 | -2.890640 | -1.602790 |
| C | -1.176375 | -1.696530 | -1.212298 |
| C | 0.953139  | -2.185334 | -2.267475 |
| H | 1.768063  | -2.874736 | -2.506727 |
| H | 0.666231  | -1.621318 | -3.160748 |
| C | 1.243056  | -2.576791 | 0.260516  |
| C | 0.338981  | -3.426436 | -0.279313 |
| C | -0.893316 | -3.943285 | -2.482669 |
| H | -1.768954 | -4.401313 | -2.012163 |
| H | -1.222062 | -3.508701 | -3.431597 |
| H | -0.178100 | -4.739695 | -2.710222 |
| C | -0.212726 | -4.674122 | 0.310057  |
| H | 0.151166  | -5.567833 | -0.212490 |
| H | 0.041314  | -4.780966 | 1.367036  |
| H | -1.304900 | -4.692388 | 0.213386  |
| C | 1.962443  | -2.631648 | 1.528487  |
| C | 2.244387  | -1.439626 | 2.221003  |
| C | 2.411864  | -3.840333 | 2.088925  |
| C | 2.904123  | -1.457747 | 3.444438  |



|   |           |           |           |
|---|-----------|-----------|-----------|
| H | 1.928635  | -0.488248 | 1.790410  |
| C | 3.077240  | -3.855455 | 3.310018  |
| H | 2.259238  | -4.769818 | 1.547545  |
| C | 3.319914  | -2.667467 | 3.997484  |
| H | 3.100980  | -0.523265 | 3.964185  |
| H | 3.419701  | -4.801117 | 3.721183  |
| H | 3.841404  | -2.682900 | 4.950275  |
| P | 1.338186  | -1.101340 | -0.843682 |
| C | -2.641879 | -1.871737 | -1.292157 |
| C | -3.311711 | -1.688089 | -2.508368 |
| C | -3.374162 | -2.281777 | -0.171784 |
| C | -4.687596 | -1.879387 | -2.594467 |
| H | -2.747748 | -1.377398 | -3.385626 |
| C | -4.749732 | -2.475215 | -0.260519 |
| H | -2.860976 | -2.430215 | 0.776108  |
| C | -5.411646 | -2.269141 | -1.469578 |
| H | -5.195131 | -1.720608 | -3.542210 |
| H | -5.305881 | -2.782621 | 0.621283  |
| H | -6.486858 | -2.414400 | -1.534195 |
| C | -0.833642 | 0.705269  | -0.227365 |
| H | -0.244257 | 0.837351  | 0.693956  |
| C | -2.287689 | 0.893999  | 0.125407  |
| C | -2.716131 | 0.634538  | 1.429919  |
| C | -3.235533 | 1.287213  | -0.816168 |
| C | -4.056697 | 0.749735  | 1.773552  |
| H | -1.985212 | 0.336173  | 2.181201  |
| C | -4.581214 | 1.389483  | -0.471849 |
| H | -2.922708 | 1.506016  | -1.835384 |
| C | -5.023574 | 1.120840  | 0.827755  |

|   |           |           |           |
|---|-----------|-----------|-----------|
| H | -4.358250 | 0.549137  | 2.799966  |
| H | -5.291042 | 1.679970  | -1.241036 |
| N | -0.353938 | 1.743056  | -1.185433 |
| H | -0.194707 | 1.368023  | -2.116917 |
| S | 0.917161  | 2.786630  | -0.810104 |
| O | 1.911444  | 2.113492  | 0.159010  |
| C | 0.102184  | 4.077435  | 0.273803  |
| C | 1.201385  | 5.120970  | 0.448746  |
| H | 0.804420  | 5.963879  | 1.022425  |
| H | 2.057908  | 4.715633  | 0.995249  |
| H | 1.554906  | 5.511334  | -0.511769 |
| C | -0.303196 | 3.485217  | 1.609154  |
| H | 0.517338  | 2.921608  | 2.063107  |
| H | -0.564004 | 4.301176  | 2.291484  |
| H | -1.180596 | 2.838263  | 1.523960  |
| C | -1.077211 | 4.629876  | -0.505210 |
| H | -1.494585 | 5.482848  | 0.039498  |
| H | -0.783614 | 4.986092  | -1.498807 |
| H | -1.866030 | 3.881412  | -0.624209 |
| C | -6.489443 | 1.225341  | 1.245449  |
| C | -6.958187 | -0.123920 | 1.805288  |
| H | -7.995504 | -0.054566 | 2.152222  |
| H | -6.912247 | -0.905475 | 1.039469  |
| H | -6.347465 | -0.449725 | 2.653751  |
| C | -7.397329 | 1.600727  | 0.076358  |
| H | -8.437113 | 1.652390  | 0.415251  |
| H | -7.141174 | 2.577946  | -0.346847 |
| H | -7.350068 | 0.858506  | -0.729041 |
| C | -6.624063 | 2.293116  | 2.339069  |

|    |           |           |           |
|----|-----------|-----------|-----------|
| H  | -6.026589 | 2.043243  | 3.222063  |
| H  | -6.295823 | 3.274770  | 1.980349  |
| H  | -7.668049 | 2.383709  | 2.660000  |
| Cu | 2.772235  | 0.377669  | -0.493489 |
| N  | 4.735204  | 0.788570  | -0.352408 |
| C  | 5.037898  | 0.549393  | 1.084110  |
| H  | 4.344744  | 1.191661  | 1.643732  |
| H  | 4.745664  | -0.485760 | 1.294870  |
| C  | 5.428193  | -0.155069 | -1.277604 |
| H  | 5.371298  | -1.140389 | -0.801810 |
| H  | 4.814112  | -0.219788 | -2.183427 |
| C  | 4.935519  | 2.208105  | -0.723188 |
| H  | 4.417574  | 2.803058  | 0.036651  |
| H  | 5.998831  | 2.481569  | -0.679311 |
| C  | 6.453109  | 0.794500  | 1.567835  |
| H  | 6.469950  | 0.740570  | 2.660402  |
| H  | 7.155509  | 0.043776  | 1.198677  |
| H  | 6.824572  | 1.783944  | 1.285570  |
| C  | 6.856085  | 0.168011  | -1.677131 |
| H  | 7.546592  | 0.208019  | -0.832456 |
| H  | 7.215151  | -0.610845 | -2.356104 |
| H  | 6.929410  | 1.118097  | -2.215217 |
| C  | 4.361969  | 2.508351  | -2.089095 |
| H  | 4.337532  | 3.585744  | -2.272630 |
| H  | 4.934653  | 2.044082  | -2.897731 |
| H  | 3.331840  | 2.132270  | -2.155035 |

Vibrational frequencies

|         |         |         |
|---------|---------|---------|
| 22.7264 | 27.5672 | 30.2866 |
| 36.3649 | 38.3759 | 41.2391 |

|          |          |          |
|----------|----------|----------|
| 43.5868  | 56.4900  | 62.4552  |
| 68.9548  | 78.6090  | 80.2884  |
| 81.1001  | 90.3458  | 95.5107  |
| 97.1525  | 103.4495 | 106.9435 |
| 109.9208 | 115.4176 | 120.1457 |
| 131.9641 | 133.2485 | 146.1682 |
| 153.8126 | 159.3758 | 171.5571 |
| 177.9996 | 182.8489 | 188.6429 |
| 192.1881 | 199.2799 | 215.9160 |
| 223.1833 | 227.9829 | 237.0144 |
| 240.9978 | 249.3235 | 255.1472 |
| 262.9303 | 265.9793 | 269.7371 |
| 271.3924 | 275.8536 | 278.5021 |
| 279.4691 | 285.1300 | 296.9465 |
| 302.5316 | 310.2326 | 320.7931 |
| 323.6463 | 333.0219 | 335.3453 |
| 335.9392 | 352.9261 | 361.1406 |
| 363.7928 | 363.9293 | 366.1828 |
| 373.6734 | 376.2686 | 382.9576 |
| 391.1060 | 402.3614 | 411.7747 |
| 412.6135 | 420.9896 | 424.6237 |
| 429.5335 | 436.3880 | 441.1749 |
| 470.4206 | 473.6240 | 476.7933 |
| 491.9640 | 494.0637 | 510.1614 |
| 514.1924 | 533.7171 | 551.5008 |
| 554.6925 | 560.7571 | 571.7010 |
| 581.4092 | 603.3911 | 614.4426 |
| 623.2711 | 629.6425 | 636.9857 |
| 641.2065 | 654.5891 | 656.1693 |

|           |           |           |
|-----------|-----------|-----------|
| 698.8596  | 707.0049  | 716.6915  |
| 722.9315  | 730.3634  | 735.4922  |
| 748.6831  | 768.3271  | 773.3276  |
| 775.5720  | 782.7091  | 797.0849  |
| 807.5044  | 813.8237  | 816.4089  |
| 832.2728  | 841.6140  | 851.7823  |
| 860.6917  | 861.6532  | 867.1918  |
| 876.0448  | 894.1486  | 906.9792  |
| 911.0269  | 911.5557  | 918.6493  |
| 928.3854  | 931.2875  | 942.7352  |
| 943.8010  | 945.0949  | 946.3162  |
| 953.5859  | 954.9101  | 957.9510  |
| 966.2772  | 967.4524  | 971.4696  |
| 974.1489  | 985.4998  | 989.9903  |
| 992.8348  | 1005.0739 | 1016.4158 |
| 1017.6989 | 1019.1986 | 1020.6915 |
| 1028.3762 | 1033.1010 | 1034.2345 |
| 1035.7109 | 1039.6484 | 1044.6811 |
| 1047.3615 | 1054.9922 | 1058.4175 |
| 1063.1183 | 1074.0984 | 1076.8518 |
| 1086.0723 | 1093.1989 | 1103.3754 |
| 1110.8575 | 1113.7575 | 1117.9060 |
| 1119.9591 | 1136.9178 | 1137.7546 |
| 1160.7308 | 1165.3130 | 1171.2986 |
| 1171.9763 | 1178.8703 | 1183.1216 |
| 1197.2668 | 1199.7999 | 1203.3643 |
| 1205.8232 | 1216.8298 | 1217.9751 |
| 1231.8970 | 1235.2764 | 1240.7431 |
| 1250.2420 | 1269.5122 | 1273.1917 |

|           |           |           |
|-----------|-----------|-----------|
| 1276.6378 | 1292.4752 | 1300.0452 |
| 1311.9359 | 1316.6338 | 1320.4477 |
| 1328.8253 | 1340.5096 | 1342.0773 |
| 1342.2558 | 1350.3688 | 1367.9115 |
| 1378.1017 | 1378.5963 | 1383.0606 |
| 1385.4516 | 1385.5663 | 1388.0030 |
| 1390.7250 | 1394.5461 | 1397.8489 |
| 1397.9974 | 1398.7125 | 1398.8587 |
| 1403.9464 | 1414.0422 | 1417.0896 |
| 1422.4163 | 1432.6621 | 1443.1612 |
| 1448.5090 | 1450.8142 | 1453.1363 |
| 1455.0985 | 1457.2916 | 1458.3289 |
| 1461.0575 | 1465.3433 | 1466.6236 |
| 1467.2554 | 1468.1822 | 1470.8427 |
| 1473.0822 | 1473.6822 | 1474.5862 |
| 1475.1513 | 1476.2422 | 1477.7891 |
| 1481.1311 | 1483.3316 | 1483.6684 |
| 1486.9335 | 1490.0349 | 1490.4186 |
| 1492.1522 | 1494.2553 | 1502.1594 |
| 1517.3996 | 1528.1247 | 1531.9992 |
| 1549.1655 | 1622.7703 | 1626.3317 |
| 1631.1491 | 1655.8893 | 1657.3000 |
| 1666.3971 | 1670.3101 | 1702.1478 |
| 3041.4116 | 3045.5372 | 3045.6931 |
| 3048.8789 | 3050.4213 | 3053.6088 |
| 3055.6732 | 3056.6136 | 3056.7047 |
| 3060.1451 | 3060.2124 | 3064.6689 |
| 3070.6398 | 3071.3979 | 3075.1738 |
| 3086.6233 | 3117.7069 | 3121.4586 |

|           |           |           |
|-----------|-----------|-----------|
| 3125.1292 | 3126.1126 | 3139.8179 |
| 3141.9082 | 3142.5874 | 3144.9447 |
| 3145.4868 | 3150.3616 | 3153.3593 |
| 3153.4251 | 3155.7168 | 3157.3400 |
| 3159.9862 | 3160.5185 | 3161.3247 |
| 3162.1184 | 3162.8980 | 3168.2655 |
| 3168.8815 | 3174.7200 | 3175.2543 |
| 3178.8313 | 3179.7248 | 3180.9497 |
| 3183.1138 | 3183.5338 | 3188.9142 |
| 3189.7786 | 3195.7337 | 3195.8752 |
| 3197.3998 | 3202.4993 | 3203.9782 |
| 3204.5374 | 3214.9444 | 3217.1798 |
| 3223.6683 | 3227.5233 | 3554.1996 |

## PR

Zero-point correction= 0.426235

Thermal correction to Energy= 0.449985

Thermal correction to Enthalpy= 0.450929

Thermal correction to Gibbs Free Energy= 0.373681

Sum of electronic and zero-point Energies= -1187.506863

Sum of electronic and thermal Energies= -1187.483113

Sum of electronic and thermal Enthalpies= -1187.482169

Sum of electronic and thermal Free Energies= -1187.559417

Cartesian coordinates

|   |           |           |           |
|---|-----------|-----------|-----------|
| C | 0.259927  | -0.906368 | -0.746327 |
| H | 0.301182  | -0.484839 | -1.761139 |
| N | -1.013458 | -1.593880 | -0.629258 |
| C | -1.973395 | -0.483762 | -0.632931 |
| C | -3.312616 | -1.017339 | -0.182223 |

|   |           |           |           |
|---|-----------|-----------|-----------|
| O | -3.496599 | -1.541323 | 0.898185  |
| O | -4.259004 | -0.870371 | -1.121004 |
| C | -5.566691 | -1.318538 | -0.732467 |
| H | -5.920605 | -0.757906 | 0.136567  |
| H | -6.212154 | -1.131649 | -1.588994 |
| H | -5.554460 | -2.383350 | -0.490775 |
| C | 1.479398  | -1.759847 | -0.542150 |
| C | 2.711088  | -1.308759 | -1.033536 |
| C | 1.437702  | -2.971869 | 0.152731  |
| C | 3.874783  | -2.039376 | -0.817976 |
| H | 2.752301  | -0.377925 | -1.597029 |
| C | 2.601318  | -3.709238 | 0.359399  |
| H | 0.493786  | -3.353398 | 0.532258  |
| C | 3.823447  | -3.243793 | -0.118678 |
| H | 4.821283  | -1.672581 | -1.205668 |
| H | 2.550293  | -4.651408 | 0.898715  |
| H | 4.729998  | -3.819763 | 0.046590  |
| C | 2.094507  | 1.649591  | 0.632365  |
| C | 1.049926  | 1.469194  | -0.288903 |
| C | 1.052506  | 2.190836  | -1.472900 |
| C | 2.082231  | 3.108709  | -1.711924 |
| C | 3.102734  | 3.281203  | -0.778246 |
| C | 3.127911  | 2.548229  | 0.411111  |
| C | 0.760522  | 0.034786  | 1.571903  |
| C | 0.159379  | 0.370180  | 0.204521  |
| H | 0.266432  | 2.041554  | -2.210624 |
| H | 2.087667  | 3.685912  | -2.631720 |
| H | 3.898775  | 3.993461  | -0.977067 |
| H | 3.928834  | 2.673279  | 1.133737  |



|   |           |           |           |
|---|-----------|-----------|-----------|
| H | 2.501678  | 0.740085  | 2.524683  |
| O | 0.322978  | -0.771732 | 2.378440  |
| N | 1.897170  | 0.796795  | 1.717541  |
| C | -1.380252 | 0.576533  | 0.331689  |
| H | -1.645688 | 0.216808  | 1.337879  |
| C | -1.891740 | 2.012475  | 0.195016  |
| H | -1.503666 | 2.433555  | -0.744537 |
| C | -1.388781 | 2.869507  | 1.350707  |
| H | -1.739507 | 3.902570  | 1.257764  |
| H | -1.758267 | 2.480368  | 2.307761  |
| H | -0.295875 | 2.898770  | 1.406484  |
| C | -3.414551 | 2.059187  | 0.136854  |
| H | -3.768433 | 3.095015  | 0.137854  |
| H | -3.813295 | 1.581139  | -0.762611 |
| H | -3.860677 | 1.562672  | 1.008832  |
| H | -2.049441 | -0.087539 | -1.654205 |
| H | -1.071256 | -2.007072 | 0.304077  |

Vibrational frequencies

|          |          |          |
|----------|----------|----------|
| 32.1638  | 44.1040  | 59.2409  |
| 65.4445  | 68.4032  | 79.9003  |
| 91.5201  | 101.6008 | 120.2798 |
| 131.3917 | 155.8992 | 163.6671 |
| 175.9403 | 198.9176 | 218.7214 |
| 225.3258 | 243.9271 | 246.4086 |
| 252.8624 | 269.0290 | 277.1846 |
| 316.5138 | 319.3493 | 351.0949 |
| 364.6988 | 384.4239 | 404.9130 |
| 413.3129 | 427.7900 | 463.5931 |
| 477.0502 | 496.2847 | 511.3148 |

|           |           |           |
|-----------|-----------|-----------|
| 527.9750  | 559.4593  | 572.8777  |
| 592.5374  | 614.4274  | 631.9868  |
| 640.3106  | 655.7480  | 682.8024  |
| 714.6216  | 719.0280  | 732.7210  |
| 757.5447  | 766.0195  | 771.9385  |
| 796.0247  | 806.5438  | 856.1438  |
| 858.5299  | 872.0940  | 886.4759  |
| 898.1074  | 915.7021  | 923.0467  |
| 928.0009  | 932.9571  | 947.8076  |
| 965.6857  | 969.3438  | 973.4529  |
| 979.9097  | 980.0414  | 992.3799  |
| 996.0445  | 1019.5052 | 1042.8345 |
| 1053.1936 | 1061.2648 | 1069.3200 |
| 1078.6373 | 1103.1438 | 1112.1942 |
| 1132.1497 | 1146.1312 | 1154.6468 |
| 1169.5701 | 1171.2246 | 1177.8380 |
| 1187.4318 | 1196.7942 | 1200.4444 |
| 1205.3389 | 1213.8723 | 1224.9826 |
| 1246.7240 | 1262.1376 | 1264.5058 |
| 1281.2202 | 1301.9001 | 1315.2066 |
| 1327.7192 | 1345.4713 | 1348.3557 |
| 1361.3266 | 1371.4042 | 1378.9180 |
| 1387.8469 | 1397.0840 | 1399.2827 |
| 1411.3613 | 1419.1080 | 1448.7926 |
| 1455.9333 | 1462.4869 | 1470.8978 |
| 1474.0149 | 1484.4790 | 1485.4829 |
| 1491.5680 | 1510.8292 | 1514.1469 |
| 1518.7051 | 1524.2456 | 1546.4633 |
| 1644.7955 | 1657.0247 | 1667.0912 |

|           |           |           |
|-----------|-----------|-----------|
| 1679.4487 | 1820.9308 | 1830.1473 |
| 3034.5608 | 3045.9697 | 3050.1807 |
| 3053.5611 | 3058.4955 | 3076.3905 |
| 3077.3427 | 3133.6974 | 3137.6343 |
| 3158.6393 | 3167.1487 | 3174.2078 |
| 3176.5702 | 3177.1125 | 3190.9785 |
| 3193.8711 | 3196.9513 | 3204.7945 |
| 3206.9117 | 3216.3349 | 3220.3989 |
| 3221.0783 | 3475.8010 | 3648.7262 |

## PS

Zero-point correction= 0.426235

Thermal correction to Energy= 0.449985

Thermal correction to Enthalpy= 0.450929

Thermal correction to Gibbs Free Energy= 0.373681

Sum of electronic and zero-point Energies= -1187.506863

Sum of electronic and thermal Energies= -1187.483113

Sum of electronic and thermal Enthalpies= -1187.482169

Sum of electronic and thermal Free Energies= -1187.559417

Cartesian coordinates

|   |           |           |           |
|---|-----------|-----------|-----------|
| C | -0.259927 | -0.906368 | -0.746327 |
| H | -0.301182 | -0.484839 | -1.761139 |
| N | 1.013458  | -1.593880 | -0.629258 |
| C | 1.973395  | -0.483762 | -0.632931 |
| C | 3.312616  | -1.017339 | -0.182223 |
| O | 3.496599  | -1.541323 | 0.898185  |
| O | 4.259004  | -0.870371 | -1.121004 |
| C | 5.566691  | -1.318538 | -0.732467 |
| H | 5.920605  | -0.757906 | 0.136567  |

|   |           |           |           |
|---|-----------|-----------|-----------|
| H | 6.212154  | -1.131649 | -1.588994 |
| H | 5.554460  | -2.383350 | -0.490775 |
| C | -1.479398 | -1.759847 | -0.542150 |
| C | -2.711088 | -1.308759 | -1.033536 |
| C | -1.437702 | -2.971869 | 0.152731  |
| C | -3.874783 | -2.039376 | -0.817976 |
| H | -2.752301 | -0.377925 | -1.597029 |
| C | -2.601318 | -3.709238 | 0.359399  |
| H | -0.493786 | -3.353398 | 0.532258  |
| C | -3.823447 | -3.243793 | -0.118678 |
| H | -4.821283 | -1.672581 | -1.205668 |
| H | -2.550293 | -4.651408 | 0.898715  |
| H | -4.729998 | -3.819763 | 0.046590  |
| C | -2.094507 | 1.649591  | 0.632365  |
| C | -1.049926 | 1.469194  | -0.288903 |
| C | -1.052506 | 2.190836  | -1.472900 |
| C | -2.082231 | 3.108709  | -1.711924 |
| C | -3.102734 | 3.281203  | -0.778246 |
| C | -3.127911 | 2.548229  | 0.411111  |
| C | -0.760522 | 0.034786  | 1.571903  |
| C | -0.159379 | 0.370180  | 0.204521  |
| H | -0.266432 | 2.041554  | -2.210624 |
| H | -2.087667 | 3.685912  | -2.631720 |
| H | -3.898775 | 3.993461  | -0.977067 |
| H | -3.928834 | 2.673279  | 1.133737  |
| H | -2.501678 | 0.740085  | 2.524683  |
| O | -0.322978 | -0.771732 | 2.378440  |
| N | -1.897170 | 0.796795  | 1.717541  |
| C | 1.380252  | 0.576533  | 0.331689  |

|   |          |           |           |
|---|----------|-----------|-----------|
| H | 1.645688 | 0.216808  | 1.337879  |
| C | 1.891740 | 2.012475  | 0.195016  |
| H | 1.503666 | 2.433555  | -0.744536 |
| C | 1.388781 | 2.869507  | 1.350707  |
| H | 1.739507 | 3.902570  | 1.257764  |
| H | 1.758267 | 2.480368  | 2.307761  |
| H | 0.295875 | 2.898770  | 1.406484  |
| C | 3.414551 | 2.059187  | 0.136854  |
| H | 3.768433 | 3.095015  | 0.137854  |
| H | 3.813295 | 1.581139  | -0.762611 |
| H | 3.860677 | 1.562672  | 1.008832  |
| H | 2.049441 | -0.087539 | -1.654205 |
| H | 1.071256 | -2.007072 | 0.304077  |

Vibrational frequencies

|          |          |          |
|----------|----------|----------|
| 32.1638  | 44.1040  | 59.2409  |
| 65.4446  | 68.4032  | 79.9004  |
| 91.5201  | 101.6008 | 120.2798 |
| 131.3917 | 155.8992 | 163.6671 |
| 175.9403 | 198.9176 | 218.7214 |
| 225.3258 | 243.9271 | 246.4086 |
| 252.8624 | 269.0290 | 277.1846 |
| 316.5138 | 319.3493 | 351.0949 |
| 364.6988 | 384.4239 | 404.9130 |
| 413.3129 | 427.7900 | 463.5931 |
| 477.0502 | 496.2847 | 511.3149 |
| 527.9750 | 559.4593 | 572.8777 |
| 592.5374 | 614.4274 | 631.9868 |
| 640.3106 | 655.7480 | 682.8024 |
| 714.6216 | 719.0280 | 732.7210 |

|           |           |           |
|-----------|-----------|-----------|
| 757.5447  | 766.0195  | 771.9385  |
| 796.0247  | 806.5438  | 856.1438  |
| 858.5299  | 872.0940  | 886.4759  |
| 898.1074  | 915.7021  | 923.0467  |
| 928.0009  | 932.9571  | 947.8076  |
| 965.6857  | 969.3438  | 973.4529  |
| 979.9097  | 980.0414  | 992.3799  |
| 996.0445  | 1019.5053 | 1042.8345 |
| 1053.1936 | 1061.2648 | 1069.3200 |
| 1078.6373 | 1103.1438 | 1112.1942 |
| 1132.1496 | 1146.1312 | 1154.6468 |
| 1169.5700 | 1171.2246 | 1177.8380 |
| 1187.4318 | 1196.7942 | 1200.4444 |
| 1205.3388 | 1213.8723 | 1224.9826 |
| 1246.7240 | 1262.1376 | 1264.5058 |
| 1281.2202 | 1301.9001 | 1315.2066 |
| 1327.7192 | 1345.4713 | 1348.3557 |
| 1361.3266 | 1371.4042 | 1378.9180 |
| 1387.8469 | 1397.0840 | 1399.2827 |
| 1411.3613 | 1419.1080 | 1448.7926 |
| 1455.9333 | 1462.4869 | 1470.8978 |
| 1474.0149 | 1484.4790 | 1485.4829 |
| 1491.5680 | 1510.8292 | 1514.1469 |
| 1518.7051 | 1524.2456 | 1546.4633 |
| 1644.7955 | 1657.0247 | 1667.0912 |
| 1679.4487 | 1820.9308 | 1830.1473 |
| 3034.5608 | 3045.9697 | 3050.1807 |
| 3053.5611 | 3058.4955 | 3076.3905 |
| 3077.3427 | 3133.6974 | 3137.6343 |

|           |           |           |
|-----------|-----------|-----------|
| 3158.6393 | 3167.1487 | 3174.2078 |
| 3176.5702 | 3177.1125 | 3190.9786 |
| 3193.8711 | 3196.9513 | 3204.7945 |
| 3206.9116 | 3216.3349 | 3220.3989 |
| 3221.0783 | 3475.8010 | 3648.7262 |
